# Supplementary material for: 3-Ethynyltriimidazo[1,2-a:1′,2′-c:1″,2″-e][1,3,5]triazine Dual Short- and Long-Lived Emissions with Crystallization-Enhanced Feature: Role of Hydrogen Bonds and π-π Interactions
Source: MDPI journal article supplement (doi:10.3390/molecules29091967), 2024-04-25
Supplement: s1 [file s1]

# 3-Ethynyltriimidazo[1,2-*a*:1',2'-*c*:1'',2''-*e*][1,3,5]triazine Dual Short- and Long-Lived Emissions with Crystallization-Enhanced Feature: Role of Hydrogen Bonds and $\pi$ - $\pi$ Interactions

Daniele Malpicci<sup>1,2</sup>, Daniele Maver<sup>1,2</sup>, Elisabetta Rosadoni<sup>3</sup>, Alessia Colombo<sup>1,4</sup>, Elena Lucenti<sup>2,4</sup>,  
Daniele Marinotto<sup>2,4</sup>, Chiara Botta<sup>5</sup>, Fabio Bellina<sup>3</sup>, Elena Cariatì<sup>1,2,4,\*</sup> and Alessandra Forni<sup>2,4,\*</sup>

## Supplementary information

### Table of Contents

|                                |    |
|--------------------------------|----|
| 1. NMR and GC-MS Spectra ..... | 2  |
| 2. Photophysical Data .....    | 10 |
| 3. Crystal data .....          | 17 |
| 4. Theoretical Studies.....    | 18 |

## 1. NMR and GC-MS Spectra

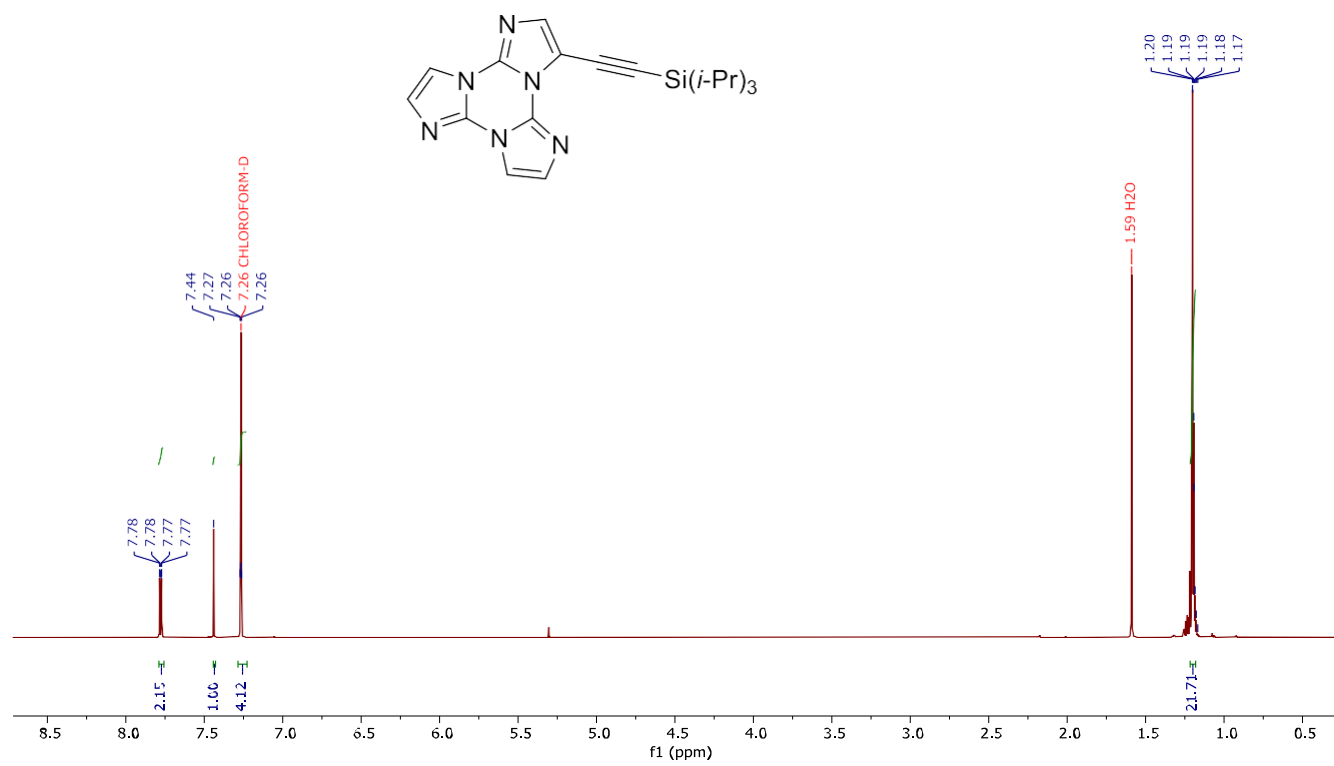

**Figure S1.** <sup>1</sup>H-NMR (CDCl<sub>3</sub>, 500 MHz) of TT-CC-TIPS.

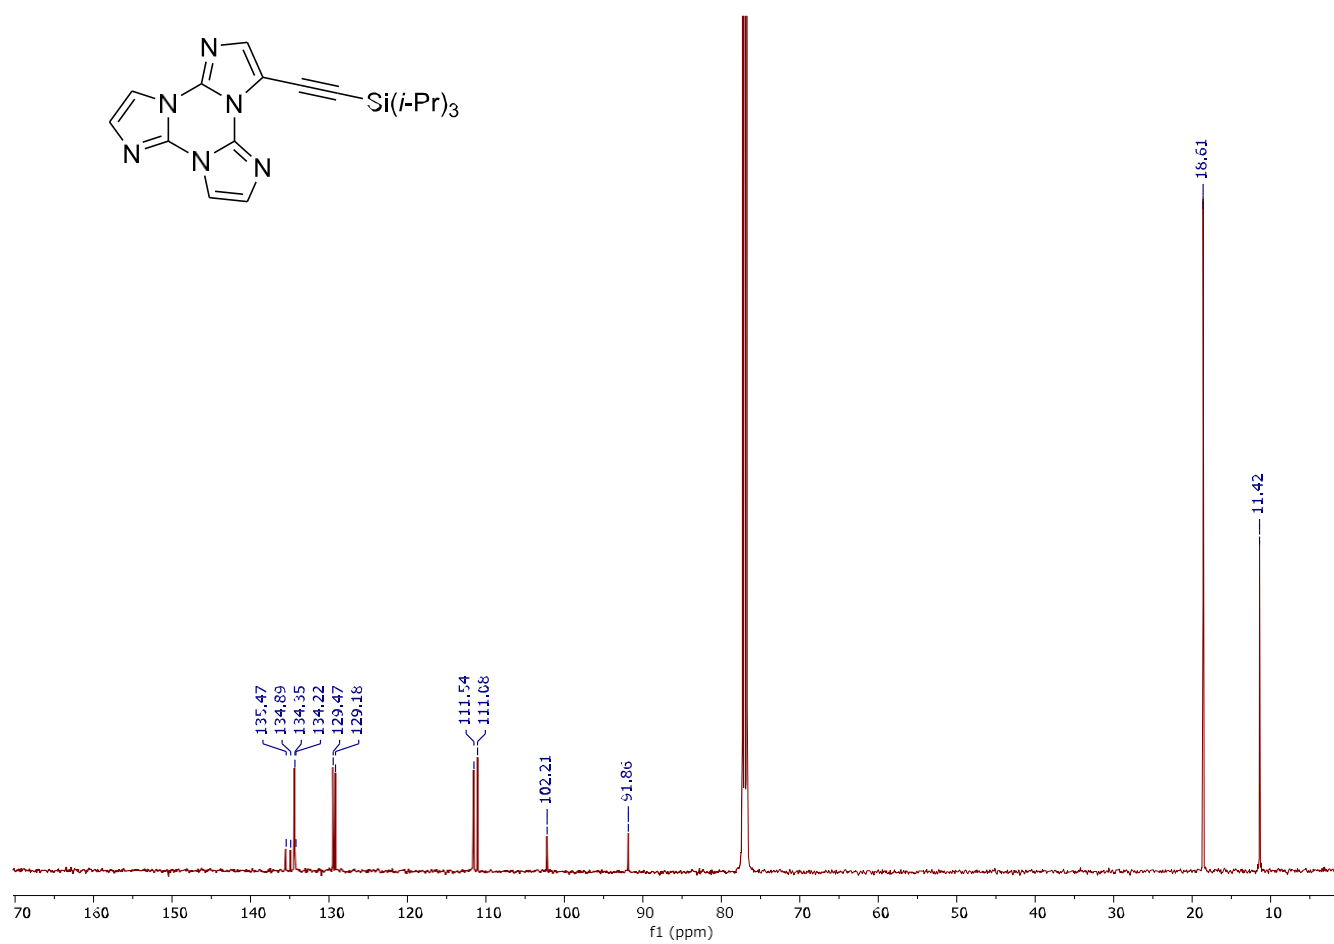

**Figure S2.** <sup>13</sup>C-NMR (CDCl<sub>3</sub>, 125 MHz) of TT-CC-TIPS.

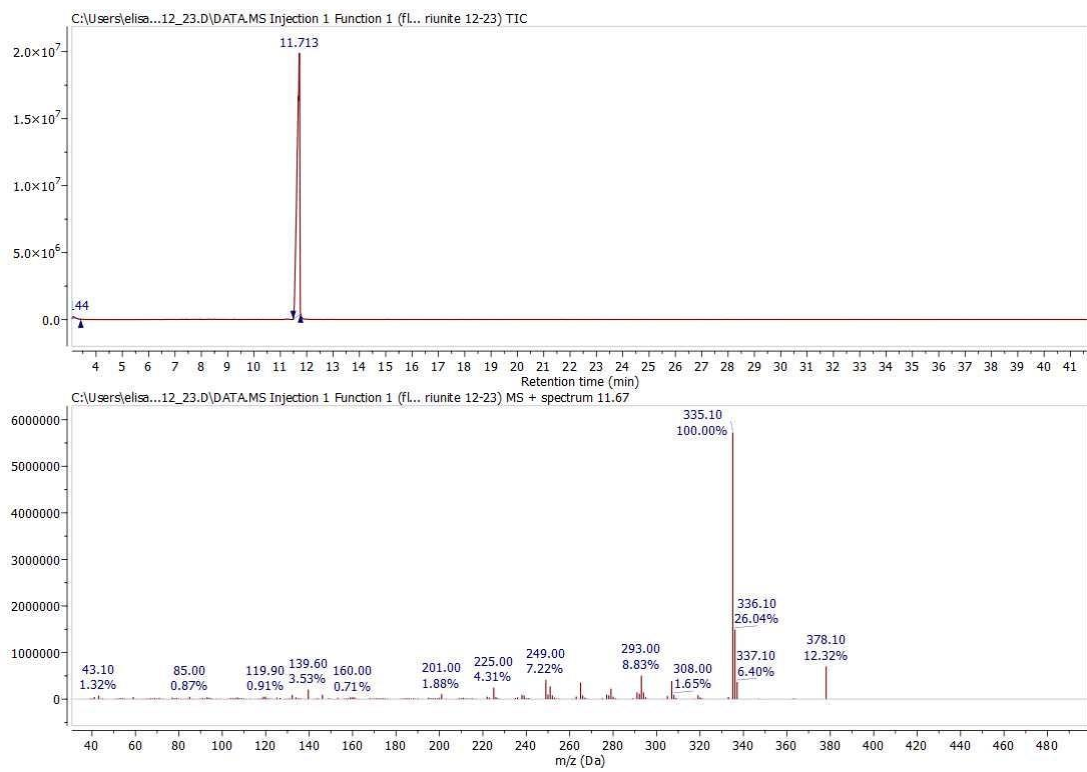

**Figure S3.** GC-MS(EI) profile of TT-CCH

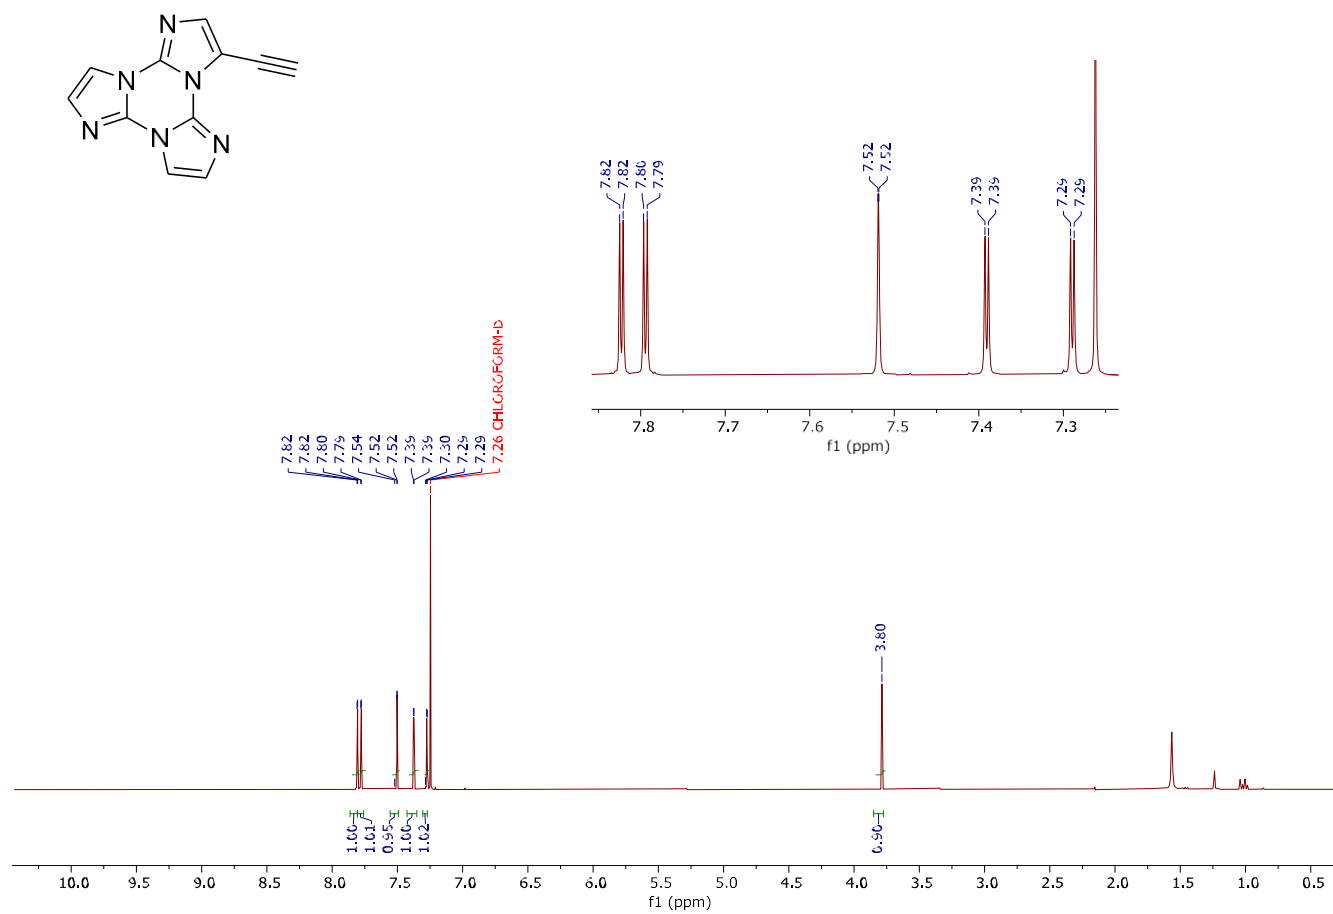

**Figure S4.** <sup>1</sup>H-NMR (CDCl<sub>3</sub>, 500 MHz) of TT-CCH

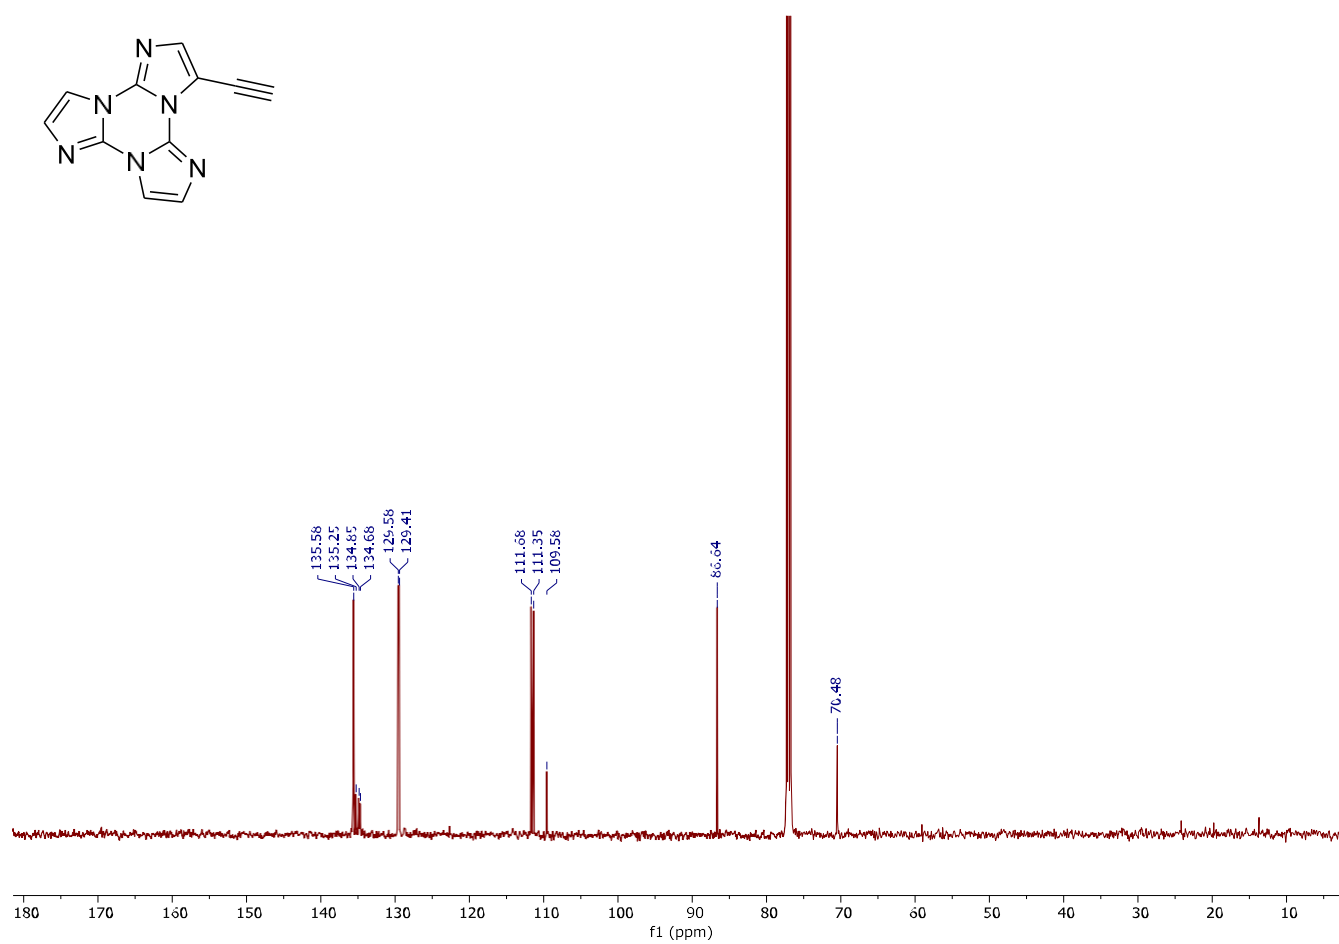

**Figure S5.** <sup>13</sup>C-NMR spectra (CDCl<sub>3</sub>, 125 MHz) of **TT-CCH**

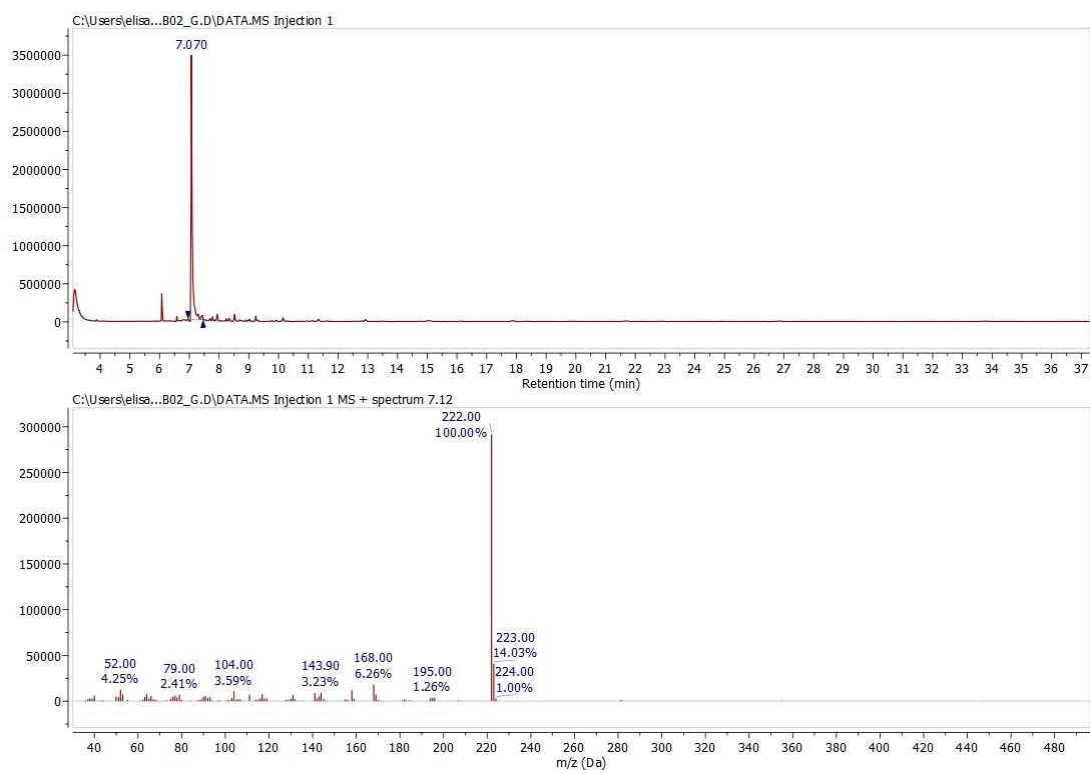

**Figure S6.** GC-MS(EI) profile of TT-CCH

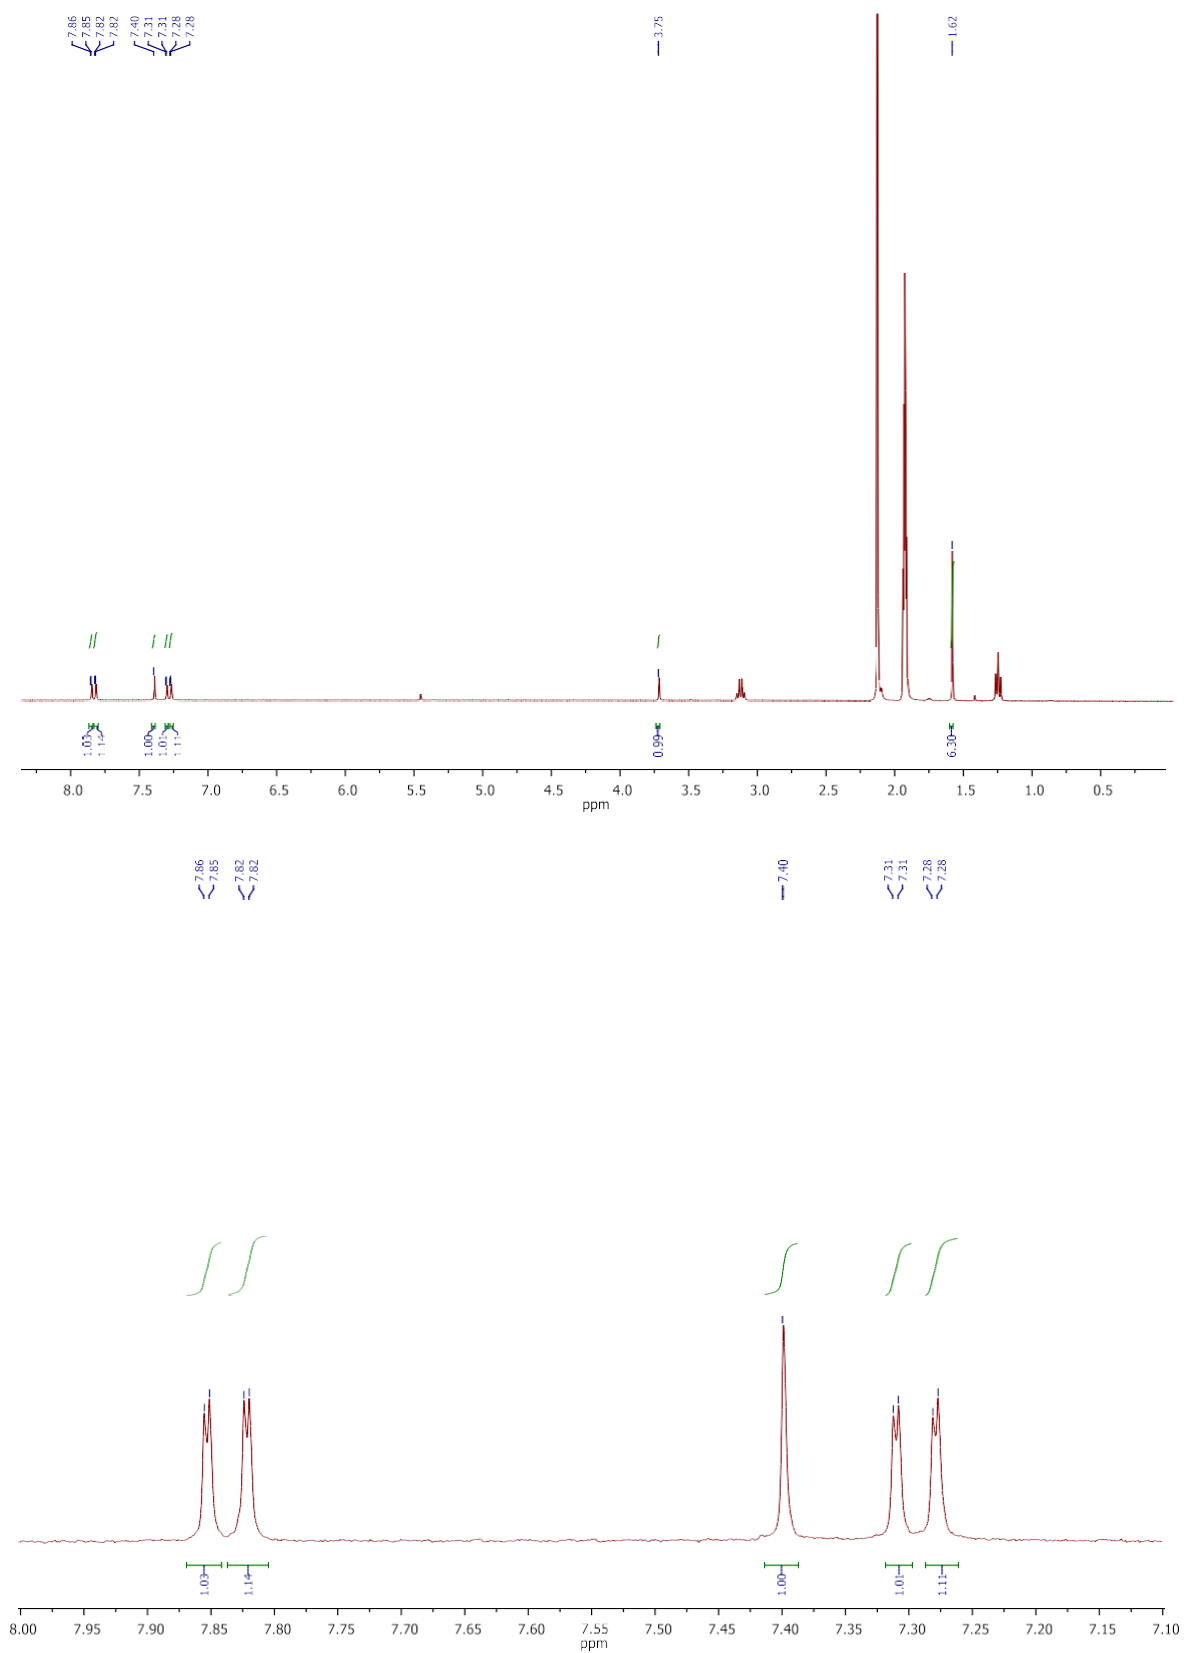

**Figure S7.**  $^1\text{H}$ -NMR ( $\text{CD}_3\text{CN}$ , 400 MHz) of **TT-CC-*i*PrOH** (top) with expansion of aromatic region (below).



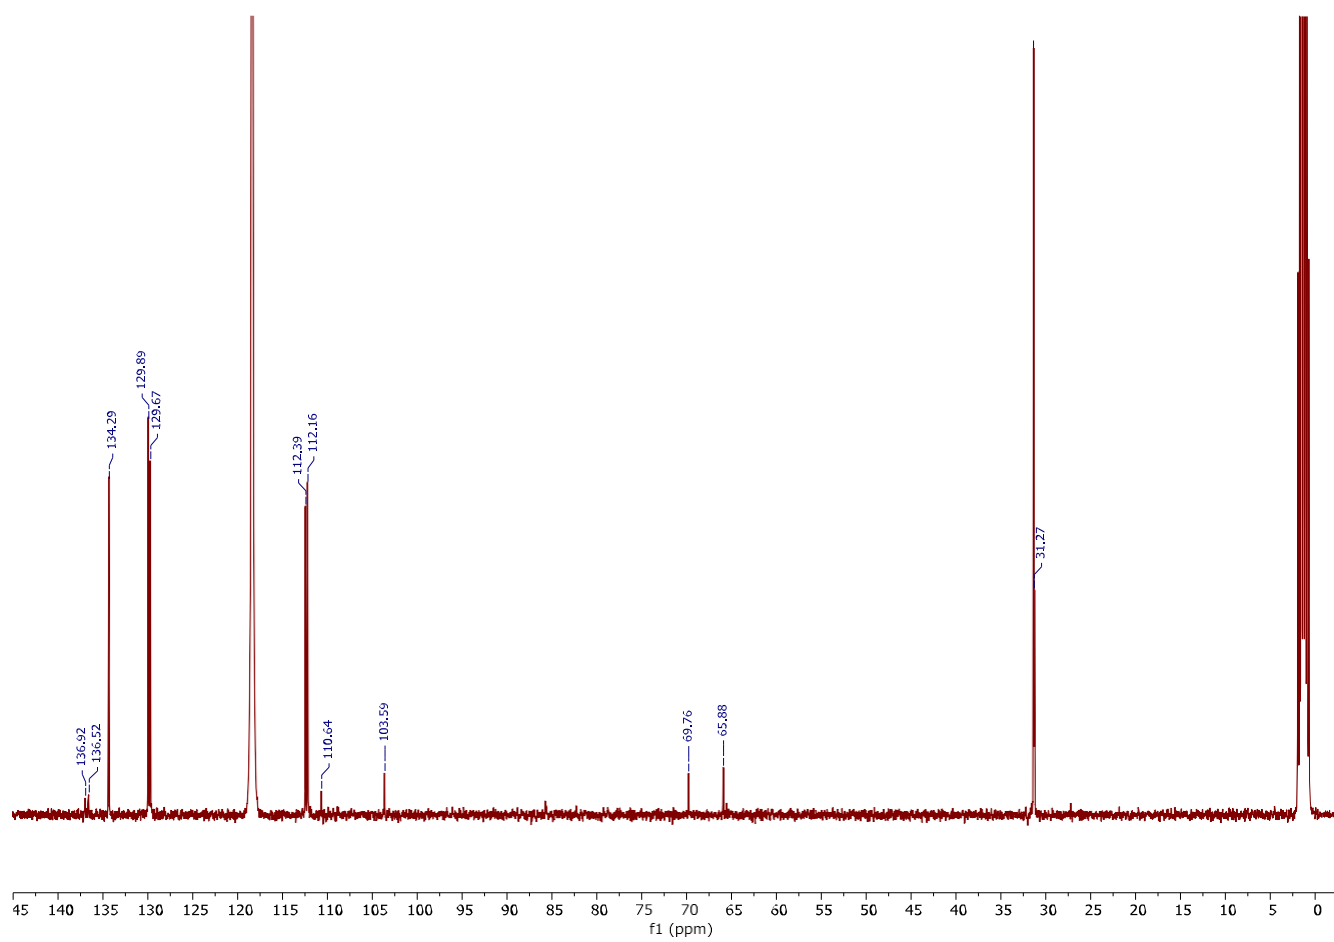

**Figure S8.**  $^{13}\text{C}$ -NMR ( $\text{CD}_3\text{CN}$ , 101 MHz) of TT-CC-*i*PrOH.

## 2. Photophysical Data

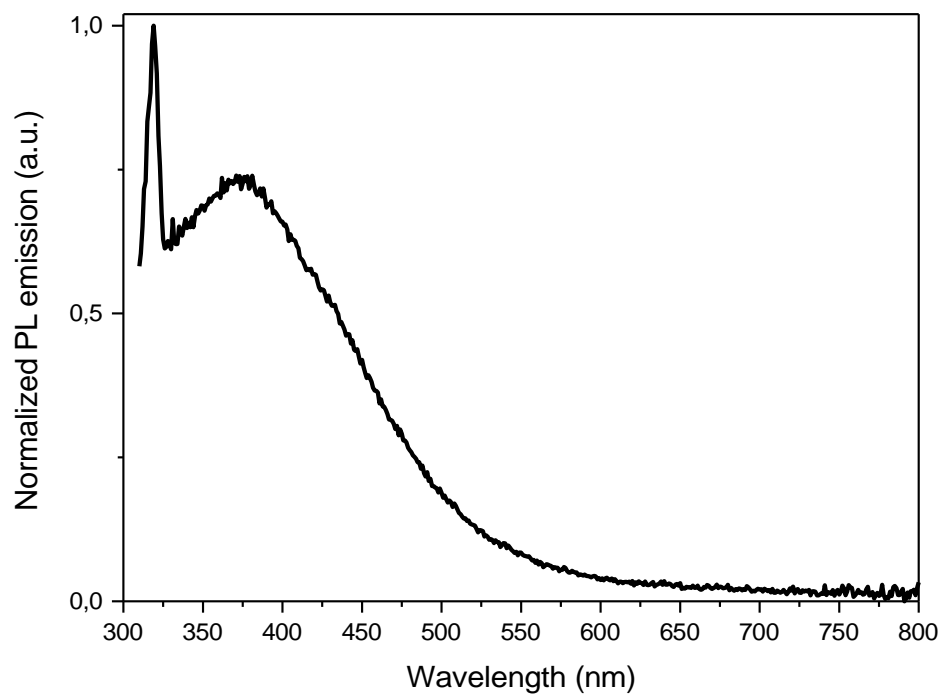

**Figure S9.** Normalized emission ( $\lambda_{\text{exc}} = 290$  nm) of **TT-CCH** in DCM solution ( $1 \times 10^{-5}$  M) at 298 K.

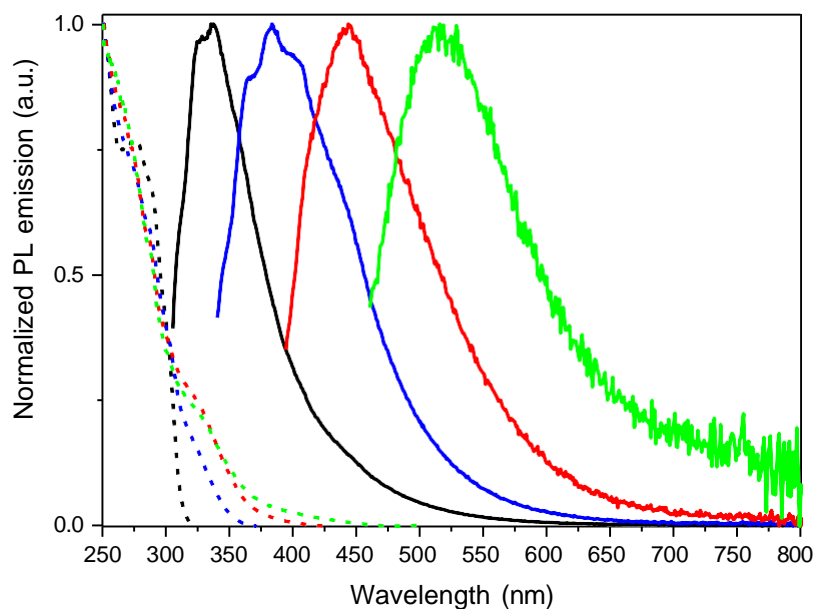

**Figure S10.** Normalized excitation (dashed lines:  $\lambda_{\text{exc}} = 336$  nm (black), 382 nm (blue), 442 nm (red) and 516 nm (green)) and normalized emission (continuous lines:  $\lambda_{\text{em}} = 290$  nm (black), 330 nm (blue), 380 nm (red) and 445 nm (green)) of **TT-CCH** in PMMA film (1.5 wt%) at 298 K.

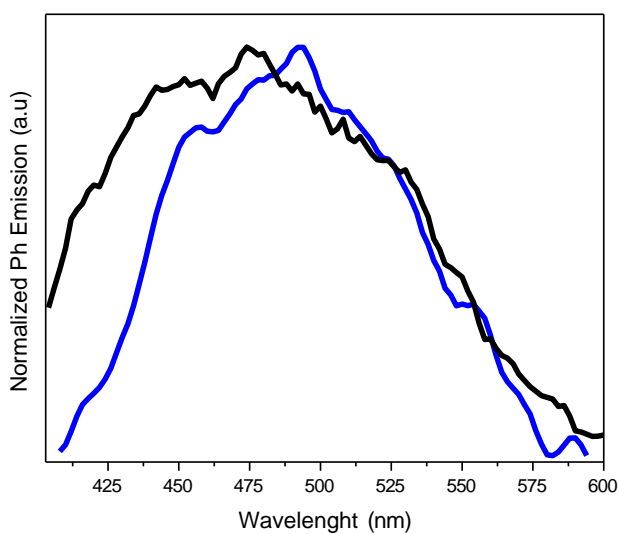

**Figure S11.** Normalized delayed spectra of **TT-CCH** in PMMA matrix (0.1 w/w%), at short (40  $\mu$ s delay, 200  $\mu$ s window; black line) and long (4 ms delay, 20 ms window; blue line) delay times.

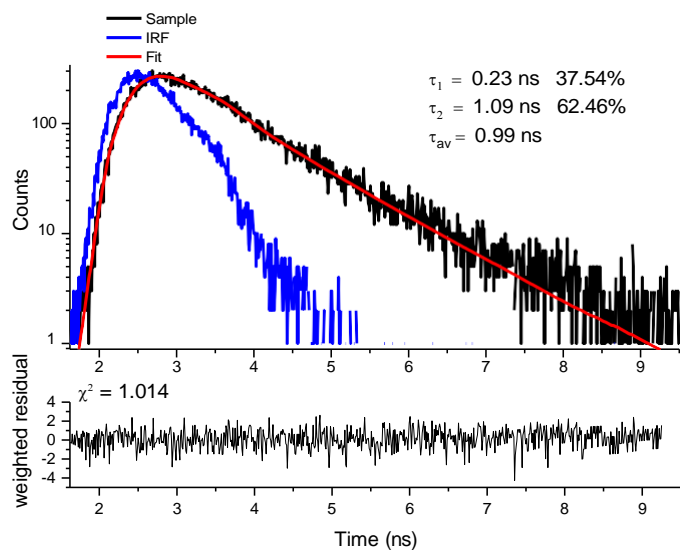

**Figure S12.** Lifetime measurement ( $\lambda_{exc} = 300 \text{ nm}$ ,  $\lambda_{em} = 336 \text{ nm}$ ) of TT-CCH in in PMMA film (5 wt%) at 298 K.

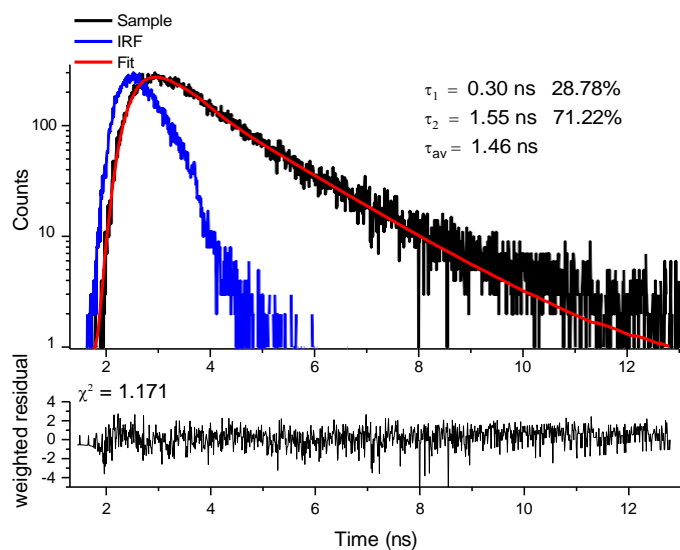

**Figure S13.** Lifetime measurement ( $\lambda_{exc} = 300 \text{ nm}$ ,  $\lambda_{em} = 383 \text{ nm}$ ) of TT-CCH in in PMMA film (5 wt%) at 298 K.

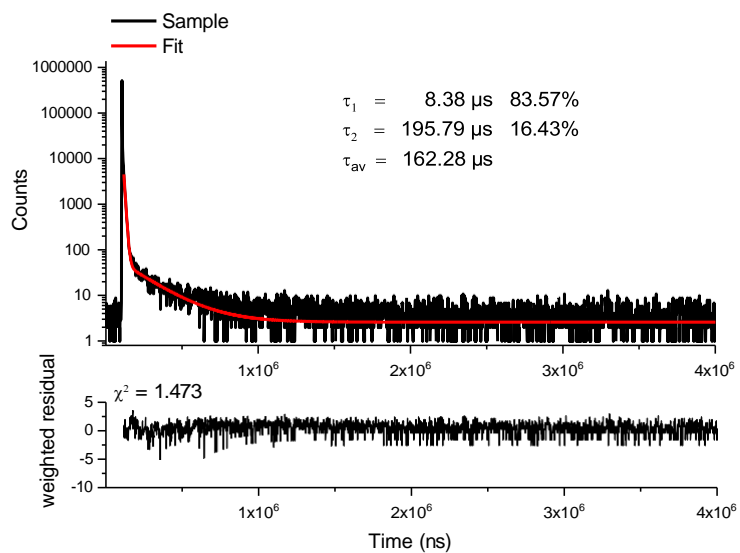

**Figure S14.** Lifetime measurement ( $\lambda_{\text{exc}} = 300 \text{ nm}$ ,  $\lambda_{\text{em}} = 445 \text{ nm}$ ) of TT-CCH in in PMMA film (5 wt%) at 298 K.

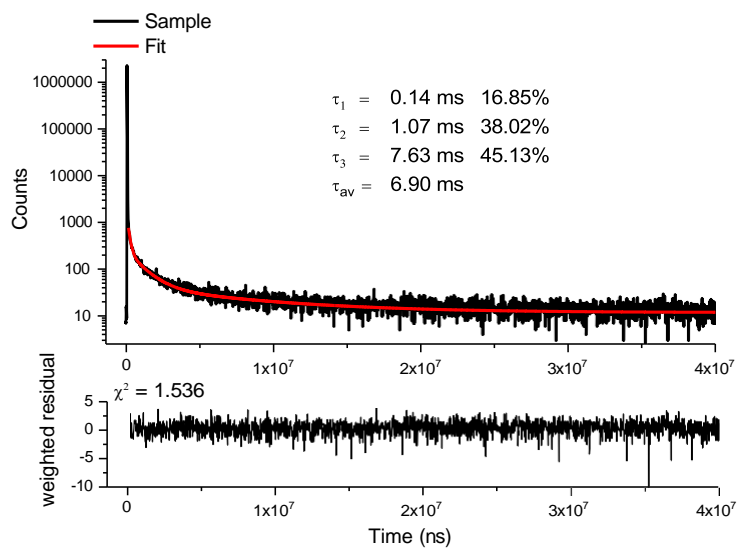

**Figure S15.** Lifetime measurement ( $\lambda_{\text{exc}} = 300 \text{ nm}$ ,  $\lambda_{\text{em}} = 516 \text{ nm}$ ) of TT-CCH in in PMMA film (5 wt%) at 298 K.

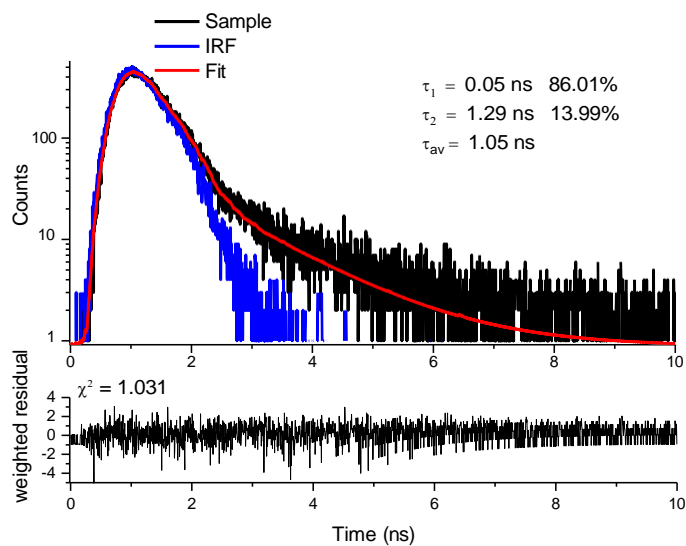

**Figure S16.** Lifetime measurement ( $\lambda_{exc} = 300 \text{ nm}$ ,  $\lambda_{em} = 370 \text{ nm}$ ) of **TT-CCH** crystals at 298 K.

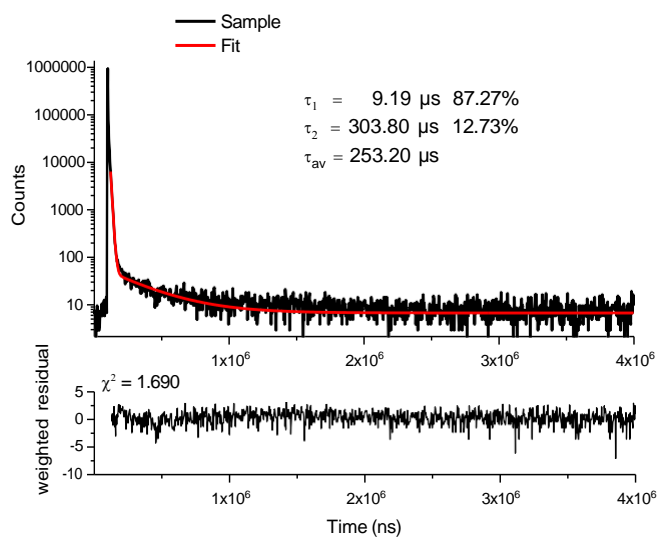

**Figure S17.** Lifetime measurement ( $\lambda_{exc} = 300 \text{ nm}$ ,  $\lambda_{em} = 418 \text{ nm}$ ) of **TT-CCH** crystals at 298 K.

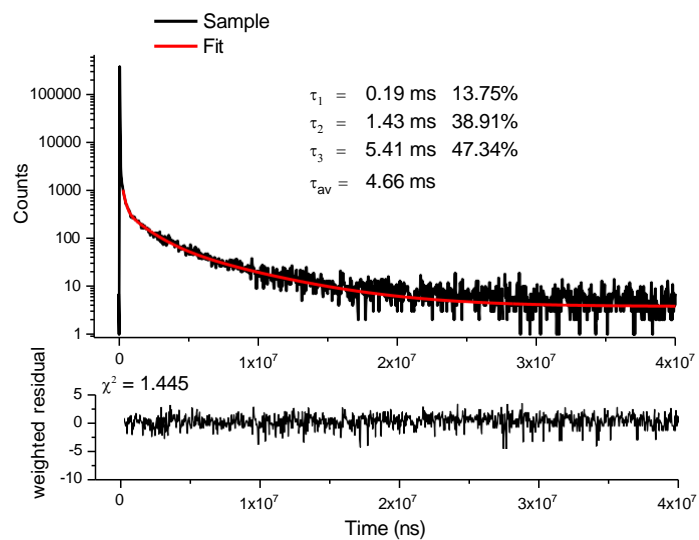

**Figure S18.** Lifetime measurement ( $\lambda_{exc} = 300 \text{ nm}$ ,  $\lambda_{em} = 520 \text{ nm}$ ) of TT-CCH crystals at 298 K.

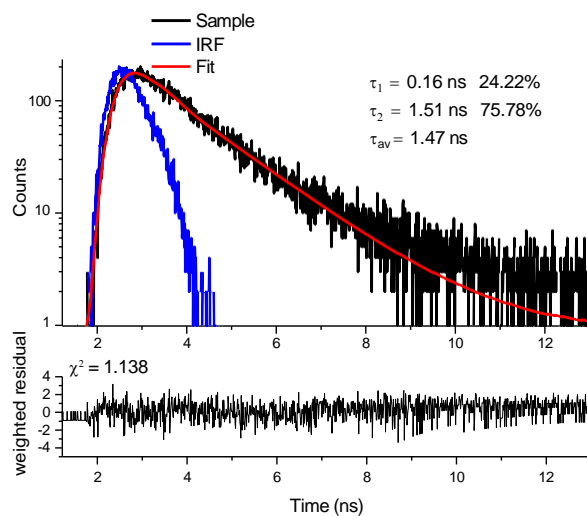

**Figure S19.** Lifetime measurement ( $\lambda_{exc} = 300 \text{ nm}$ ,  $\lambda_{em} = 379 \text{ nm}$ ) of TT-CCH crystals at 77 K.

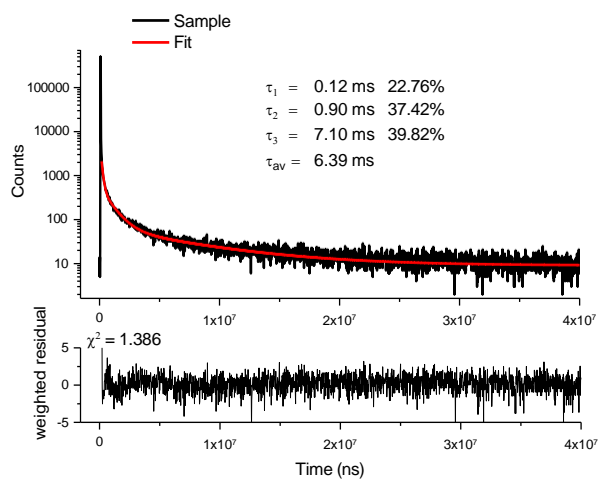

**Figure S20.** Lifetime measurement ( $\lambda_{exc} = 300 \text{ nm}$ ,  $\lambda_{em} = 419 \text{ nm}$ ) of TT-CCH crystals at 77 K.

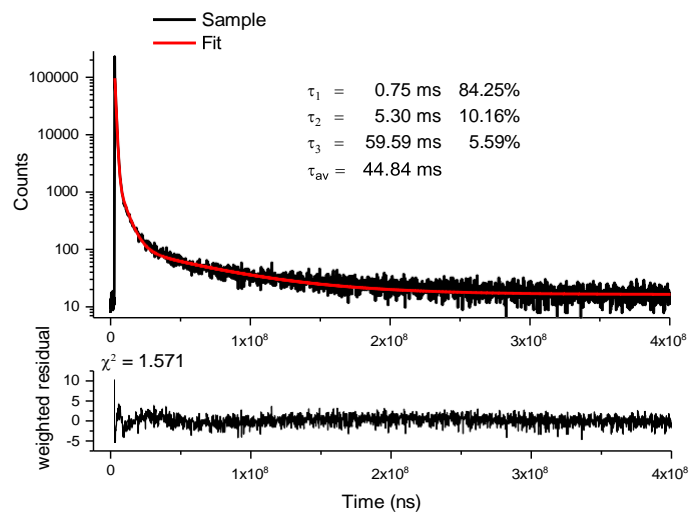

**Figure S21.** Lifetime measurement ( $\lambda_{exc} = 300 \text{ nm}$ ,  $\lambda_{em} = 525 \text{ nm}$ ) of TT-CCH crystals at 77 K.



### 3. Crystal data

**Table S1** Crystal data, data collection and refinement details for **TT-CCH**

|                                                            | <b>TT-CCH</b>                                 |
|------------------------------------------------------------|-----------------------------------------------|
| <i>Crystal data</i>                                        |                                               |
| Chemical formula                                           | C <sub>11</sub> H <sub>6</sub> N <sub>6</sub> |
| M <sub>r</sub>                                             | 222.22                                        |
| Crystal system                                             | monoclinic                                    |
| Space group                                                | P 21/1 (No. 14)                               |
| Temperature [K]                                            | 296(2)                                        |
| a [Å]                                                      | 13.35072(15)                                  |
| b [Å]                                                      | 4.63511(4)                                    |
| c [Å]                                                      | 16.41198(19)                                  |
| α [°]                                                      | 90                                            |
| β [°]                                                      | 96.7803(11)                                   |
| γ [°]                                                      | 90                                            |
| V [Å <sup>3</sup> ]                                        | 1008.504(19)                                  |
| Z                                                          | 4                                             |
| μ(CuKα) [mm <sup>-1</sup> ]                                | 0.805                                         |
| Crystal size [mm]                                          | 0.32 × 0.17 × 0.10                            |
| <i>Data collection</i>                                     |                                               |
| No. of measured reflections                                | 20327                                         |
| No. of independent reflections                             | 2177                                          |
| No. of observed reflections, I > 2σ(I)                     | 2010                                          |
| R <sub>int</sub>                                           | 0.044                                         |
| R <sub>σ</sub>                                             | 0.026                                         |
| (sin θ/λ) <sub>max</sub> [Å <sup>-1</sup> ]                | 0.82                                          |
| <i>Refinement</i>                                          |                                               |
| R[F <sup>2</sup> > 2σ(F <sup>2</sup> )]                    | 0.0440                                        |
| wR(F <sup>2</sup> )                                        | 0.1164                                        |
| S                                                          | 1.050                                         |
| No. of reflections                                         | 2177                                          |
| No. of parameters                                          | 154                                           |
| No. of restraints                                          | 0                                             |
| ΔQ <sub>max</sub> , ΔQ <sub>min</sub> (e Å <sup>-3</sup> ) | 0.162, -0.235                                 |

#### 4. Theoretical studies

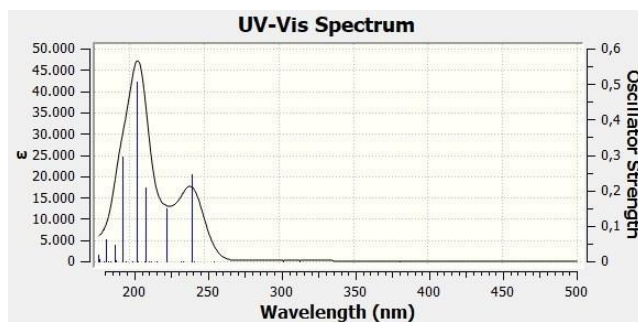

**Figure S22.** TD- $\omega$ B97X/6-311++G(d,p) absorption spectra of **TT-CCH** at the optimized geometry, obtained by convolution of the blue sticks with 0.2 eV of half-bandwidth.

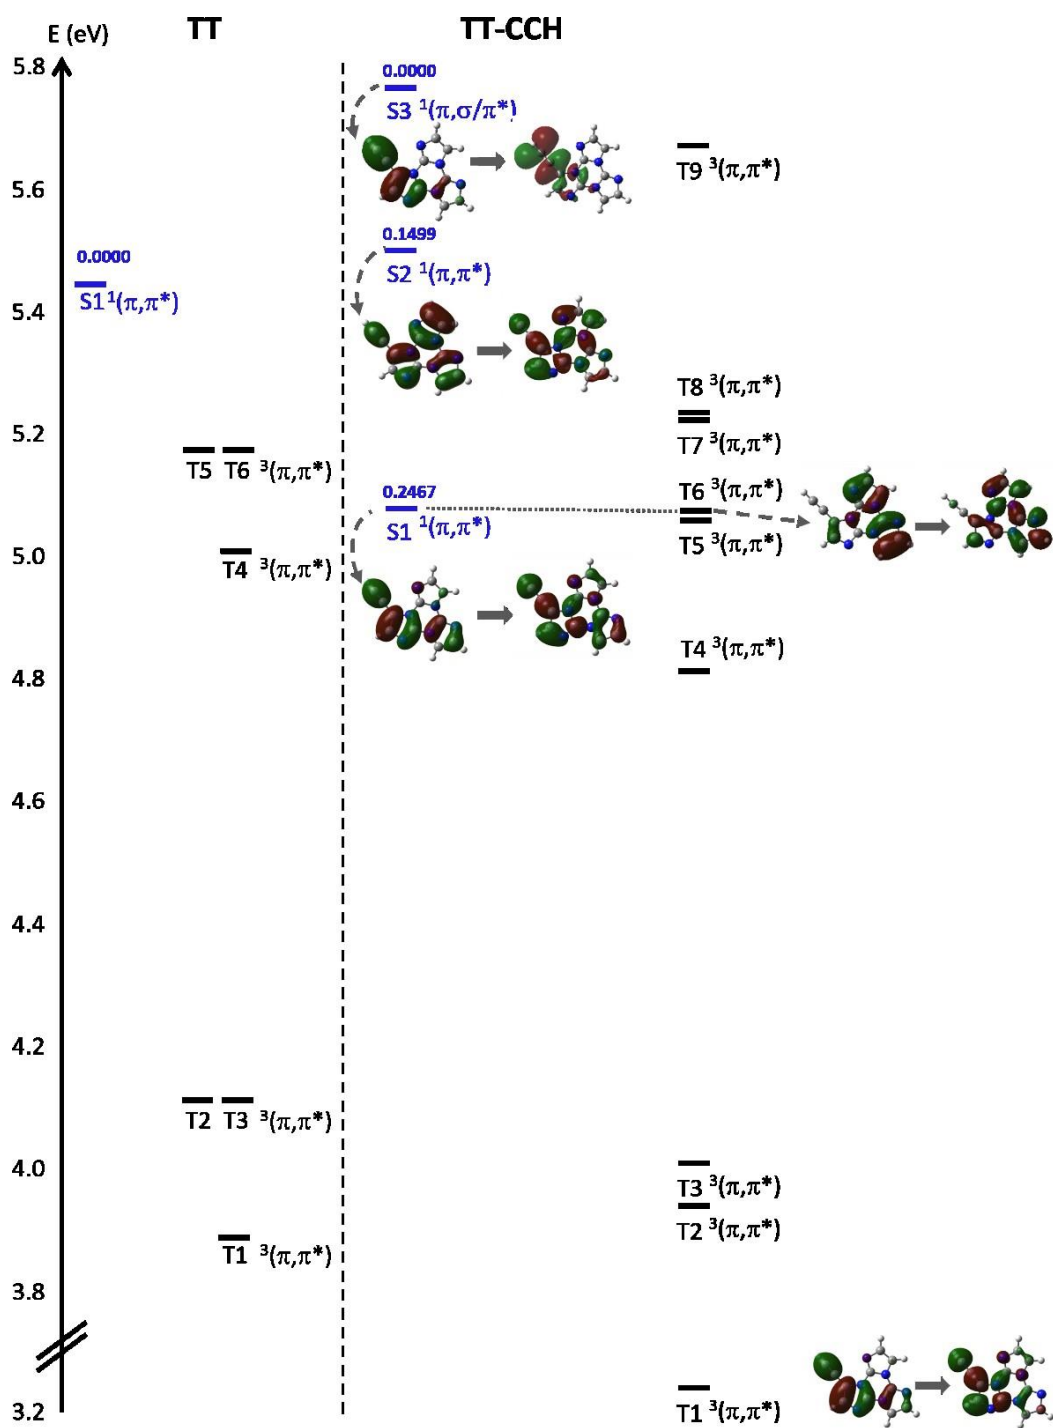

**Figure S23.** TD- $\omega$ B97X/6-311++G(d,p) electronic levels for **TT-CCH** at molecular level, compared with those of unsubstituted **TT**. In blue are reported the singlet levels with the corresponding values of oscillator strength  $f$ . Natural Transition Orbitals are included for selected transitions.

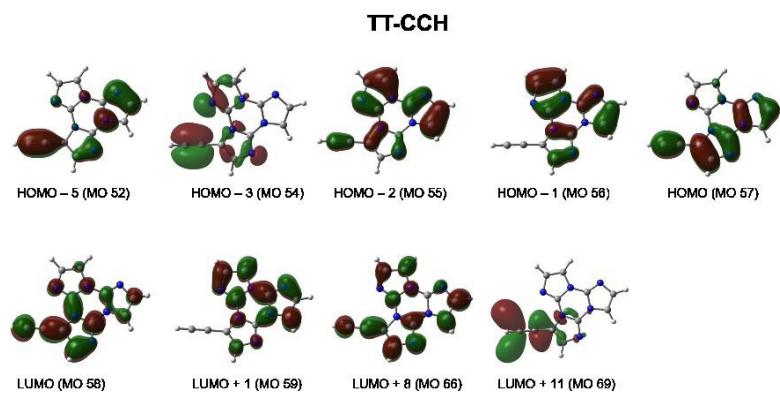

**Figure S24.** Plots of the  $\omega$ B97X/6-311++G(d,p) MOs mainly involved in the lowest energy transitions of **TT-CCH** at the optimized ground state geometry (isosurfaces value 0.02).

**Table S2** First TD- $\omega$ B97X/6-311++G(d,p) triplet and singlet electronic transitions computed for **TT-CCH** at the optimized ground state geometry.

Excitation energies and oscillator strengths:

|               |    |           |           |           |          |              |
|---------------|----|-----------|-----------|-----------|----------|--------------|
| Excited State | 1: | Triplet-A | 3.2486 eV | 381.65 nm | f=n.d.   | <S**2>=2.000 |
| 55 -> 58      |    | 0.12658   |           |           |          |              |
| 57 -> 58      |    | 0.62532   |           |           |          |              |
| 57 -> 66      |    | -0.14362  |           |           |          |              |
| 57 -> 58      |    | 0.10608   |           |           |          |              |
| Excited State | 2: | Triplet-A | 3.9434 eV | 314.41 nm | f=n.d.   | <S**2>=2.000 |
| 55 -> 58      |    | 0.24487   |           |           |          |              |
| 55 -> 66      |    | 0.17562   |           |           |          |              |
| 56 -> 59      |    | 0.53846   |           |           |          |              |
| 57 -> 59      |    | 0.11600   |           |           |          |              |
| 57 -> 66      |    | -0.14104  |           |           |          |              |
| Excited State | 3: | Triplet-A | 4.0891 eV | 303.20 nm | f=n.d.   | <S**2>=2.000 |
| 50 -> 59      |    | 0.10554   |           |           |          |              |
| 55 -> 59      |    | 0.42801   |           |           |          |              |
| 56 -> 58      |    | 0.29856   |           |           |          |              |
| 56 -> 66      |    | 0.26870   |           |           |          |              |
| 57 -> 59      |    | -0.20746  |           |           |          |              |
| Excited State | 4: | Triplet-A | 4.8239 eV | 257.02 nm | f=n.d.   | <S**2>=2.000 |
| 50 -> 58      |    | 0.11664   |           |           |          |              |
| 52 -> 58      |    | 0.18287   |           |           |          |              |
| 52 -> 59      |    | -0.10998  |           |           |          |              |
| 54 -> 69      |    | -0.16366  |           |           |          |              |
| 55 -> 58      |    | -0.12945  |           |           |          |              |
| 55 -> 66      |    | 0.11151   |           |           |          |              |
| 56 -> 58      |    | -0.23700  |           |           |          |              |
| 56 -> 59      |    | 0.14448   |           |           |          |              |
| 57 -> 58      |    | 0.14648   |           |           |          |              |
| 57 -> 59      |    | -0.24663  |           |           |          |              |
| 57 -> 66      |    | 0.31145   |           |           |          |              |
| 57 -> 70      |    | -0.13974  |           |           |          |              |
| 57 -> 77      |    | 0.13786   |           |           |          |              |
| Excited State | 5: | Triplet-A | 5.0893 eV | 243.62 nm | f=n.d.   | <S**2>=2.000 |
| 48 -> 58      |    | -0.12214  |           |           |          |              |
| 55 -> 58      |    | 0.10793   |           |           |          |              |
| 55 -> 59      |    | -0.28606  |           |           |          |              |
| 55 -> 70      |    | -0.15779  |           |           |          |              |
| 56 -> 58      |    | 0.39989   |           |           |          |              |
| 56 -> 70      |    | -0.11775  |           |           |          |              |
| 56 -> 72      |    | 0.14046   |           |           |          |              |
| 57 -> 66      |    | 0.20520   |           |           |          |              |
| Excited State | 6: | Triplet-A | 5.1252 eV | 241.91 nm | f=n.d.   | <S**2>=2.000 |
| 50 -> 59      |    | 0.12441   |           |           |          |              |
| 55 -> 58      |    | -0.31590  |           |           |          |              |
| 55 -> 66      |    | -0.19073  |           |           |          |              |
| 55 -> 72      |    | -0.11210  |           |           |          |              |
| 56 -> 59      |    | 0.13224   |           |           |          |              |
| 56 -> 66      |    | 0.21350   |           |           |          |              |
| 56 -> 70      |    | 0.17978   |           |           |          |              |
| 57 -> 59      |    | 0.31860   |           |           |          |              |
| 57 -> 77      |    | -0.11562  |           |           |          |              |
| Excited State | 7: | Singlet-A | 5.1257 eV | 241.89 nm | f=0.2467 | <S**2>=0.000 |
| 56 -> 59      |    | -0.19348  |           |           |          |              |
| 57 -> 58      |    | 0.63615   |           |           |          |              |
| Excited State | 8: | Triplet-A | 5.2473 eV | 236.28 nm | f=n.d.   | <S**2>=2.000 |
| 47 -> 58      |    | -0.12308  |           |           |          |              |
| 49 -> 69      |    | -0.19306  |           |           |          |              |

|                   |           |           |           |          |              |
|-------------------|-----------|-----------|-----------|----------|--------------|
| 52 -> 59          | -0.11295  |           |           |          |              |
| 54 -> 69          | 0.41961   |           |           |          |              |
| 54 -> 75          | 0.10820   |           |           |          |              |
| 54 -> 79          | -0.12099  |           |           |          |              |
| 55 -> 58          | -0.10282  |           |           |          |              |
| 55 -> 59          | -0.13182  |           |           |          |              |
| 56 -> 59          | 0.11404   |           |           |          |              |
| 57 -> 59          | -0.15741  |           |           |          |              |
| 57 -> 66          | 0.13619   |           |           |          |              |
| Excited State 9:  | Triplet-A | 5.2837 eV | 234.66 nm | f=n.d.   | <S**2>=2.000 |
| 52 -> 69          | -0.21578  |           |           |          |              |
| 54 -> 58          | 0.29832   |           |           |          |              |
| 54 -> 66          | -0.14310  |           |           |          |              |
| 55 -> 69          | 0.16518   |           |           |          |              |
| 57 -> 65          | 0.11325   |           |           |          |              |
| 57 -> 69          | 0.41306   |           |           |          |              |
| 57 -> 75          | 0.10163   |           |           |          |              |
| 57 -> 79          | -0.10644  |           |           |          |              |
| Excited State 10: | Singlet-A | 5.5093 eV | 225.04 nm | f=0.1499 | <S**2>=0.000 |
| 55 -> 58          | 0.27310   |           |           |          |              |
| 56 -> 58          | 0.39090   |           |           |          |              |
| 56 -> 59          | 0.27620   |           |           |          |              |
| 56 -> 66          | 0.12738   |           |           |          |              |
| 57 -> 58          | 0.13036   |           |           |          |              |
| 57 -> 59          | 0.29348   |           |           |          |              |
| 57 -> 66          | -0.14448  |           |           |          |              |
| Excited State 11: | Triplet-A | 5.6867 eV | 218.02 nm | f=n.d.   | <S**2>=2.000 |
| 47 -> 58          | 0.10962   |           |           |          |              |
| 47 -> 59          | -0.13982  |           |           |          |              |
| 48 -> 58          | -0.11166  |           |           |          |              |
| 52 -> 59          | 0.18109   |           |           |          |              |
| 54 -> 69          | 0.18107   |           |           |          |              |
| 55 -> 66          | 0.16159   |           |           |          |              |
| 55 -> 70          | 0.12960   |           |           |          |              |
| 56 -> 58          | 0.13205   |           |           |          |              |
| 56 -> 72          | -0.14933  |           |           |          |              |
| 56 -> 77          | 0.15553   |           |           |          |              |
| 57 -> 59          | 0.26760   |           |           |          |              |
| 57 -> 66          | 0.15159   |           |           |          |              |
| 57 -> 70          | -0.19197  |           |           |          |              |
| Excited State 12: | Singlet-A | 5.7799 eV | 214.51 nm | f=0.0000 | <S**2>=0.000 |
| 52 -> 69          | -0.21387  |           |           |          |              |
| 54 -> 58          | -0.19256  |           |           |          |              |
| 55 -> 69          | 0.18331   |           |           |          |              |
| 57 -> 65          | 0.14784   |           |           |          |              |
| 57 -> 69          | 0.49033   |           |           |          |              |
| 57 -> 75          | 0.10982   |           |           |          |              |
| 57 -> 79          | -0.11410  |           |           |          |              |
| Excited State 13: | Triplet-A | 5.8169 eV | 213.15 nm | f=n.d.   | <S**2>=2.000 |
| 52 -> 69          | 0.11637   |           |           |          |              |
| 54 -> 58          | 0.49806   |           |           |          |              |
| 54 -> 66          | -0.18848  |           |           |          |              |
| 55 -> 69          | -0.10429  |           |           |          |              |
| 57 -> 69          | -0.28791  |           |           |          |              |
| Excited State 14: | Singlet-A | 5.8782 eV | 210.92 nm | f=0.2084 | <S**2>=0.000 |
| 55 -> 58          | 0.22377   |           |           |          |              |
| 55 -> 66          | 0.14455   |           |           |          |              |
| 56 -> 58          | -0.36812  |           |           |          |              |
| 56 -> 59          | 0.47550   |           |           |          |              |
| 57 -> 59          | -0.17946  |           |           |          |              |
| Excited State 15: | Triplet-A | 5.9071 eV | 209.89 nm | f=n.d.   | <S**2>=2.000 |
| 47 -> 58          | 0.15576   |           |           |          |              |
| 48 -> 58          | 0.18283   |           |           |          |              |
| 50 -> 58          | 0.11910   |           |           |          |              |

|                   |           |           |           |          |              |  |
|-------------------|-----------|-----------|-----------|----------|--------------|--|
| 50 -> 66          | -0.13462  |           |           |          |              |  |
| 52 -> 58          | 0.19788   |           |           |          |              |  |
| 54 -> 69          | 0.18537   |           |           |          |              |  |
| 55 -> 59          | 0.14990   |           |           |          |              |  |
| 55 -> 70          | -0.21757  |           |           |          |              |  |
| 55 -> 72          | 0.11767   |           |           |          |              |  |
| 56 -> 58          | -0.15760  |           |           |          |              |  |
| 56 -> 72          | 0.17110   |           |           |          |              |  |
| 56 -> 77          | -0.11789  |           |           |          |              |  |
| 56 -> 87          | 0.10047   |           |           |          |              |  |
| 57 -> 59          | 0.13401   |           |           |          |              |  |
| 57 -> 106         | 0.11428   |           |           |          |              |  |
| Excited State 16: | Singlet-A | 6.0348 eV | 205.45 nm | f=0.0003 | <S**2>=0.000 |  |
| 53 -> 58          | 0.11737   |           |           |          |              |  |
| 54 -> 58          | 0.56379   |           |           |          |              |  |
| 54 -> 66          | -0.21685  |           |           |          |              |  |
| 57 -> 69          | 0.17835   |           |           |          |              |  |
| Excited State 17: | Singlet-A | 6.0392 eV | 205.30 nm | f=0.5076 | <S**2>=0.000 |  |
| 55 -> 59          | -0.38732  |           |           |          |              |  |
| 56 -> 58          | -0.29737  |           |           |          |              |  |
| 57 -> 59          | 0.45048   |           |           |          |              |  |
| Excited State 18: | Triplet-A | 6.1286 eV | 202.30 nm | f=n.d.   | <S**2>=2.000 |  |
| 50 -> 58          | -0.20930  |           |           |          |              |  |
| 55 -> 58          | 0.33109   |           |           |          |              |  |
| 55 -> 70          | -0.10523  |           |           |          |              |  |
| 55 -> 72          | -0.11191  |           |           |          |              |  |
| 55 -> 77          | 0.17012   |           |           |          |              |  |
| 56 -> 58          | -0.15760  |           |           |          |              |  |
| 56 -> 59          | -0.15644  |           |           |          |              |  |
| 56 -> 70          | 0.24664   |           |           |          |              |  |
| 57 -> 59          | 0.14654   |           |           |          |              |  |
| 57 -> 66          | 0.13199   |           |           |          |              |  |

**Table S3** First TD- $\omega$ B97X/6-311++G(d,p) triplet and singlet electronic transitions computed for the hydrogen bonded dimer of TT-CCH (Figure 6a) at the optimized ground state geometry.

Excitation energies and oscillator strengths:

|                  |           |           |           |        |              |  |
|------------------|-----------|-----------|-----------|--------|--------------|--|
| Excited State 1: | Triplet-A | 3.2218 eV | 384.83 nm | f=n.d. | <S**2>=2.000 |  |
| 113 -> 115       | -0.43313  |           |           |        |              |  |
| 113 -> 129       | 0.11947   |           |           |        |              |  |
| 114 -> 116       | 0.44973   |           |           |        |              |  |
| 114 -> 127       | -0.12338  |           |           |        |              |  |
| Excited State 2: | Triplet-A | 3.2248 eV | 384.47 nm | f=n.d. | <S**2>=2.000 |  |
| 113 -> 116       | -0.43783  |           |           |        |              |  |
| 113 -> 127       | 0.11530   |           |           |        |              |  |
| 114 -> 115       | 0.44586   |           |           |        |              |  |
| 114 -> 129       | -0.12603  |           |           |        |              |  |
| Excited State 3: | Triplet-A | 3.9616 eV | 312.97 nm | f=n.d. | <S**2>=2.000 |  |
| 109 -> 116       | 0.16929   |           |           |        |              |  |
| 109 -> 127       | 0.12687   |           |           |        |              |  |
| 110 -> 115       | -0.16744  |           |           |        |              |  |
| 110 -> 129       | -0.12004  |           |           |        |              |  |
| 111 -> 117       | -0.35547  |           |           |        |              |  |
| 112 -> 117       | -0.13365  |           |           |        |              |  |
| 112 -> 118       | 0.38450   |           |           |        |              |  |
| 113 -> 127       | -0.10132  |           |           |        |              |  |
| Excited State 4: | Triplet-A | 3.9616 eV | 312.97 nm | f=n.d. | <S**2>=2.000 |  |
| 109 -> 115       | -0.16511  |           |           |        |              |  |
| 109 -> 129       | -0.11553  |           |           |        |              |  |

|               |       |           |           |           |          |              |  |  |  |
|---------------|-------|-----------|-----------|-----------|----------|--------------|--|--|--|
| 110           | ->116 | 0.17117   |           |           |          |              |  |  |  |
| 110           | ->127 | 0.13167   |           |           |          |              |  |  |  |
| 111           | ->117 | 0.14107   |           |           |          |              |  |  |  |
| 111           | ->118 | 0.37960   |           |           |          |              |  |  |  |
| 112           | ->117 | -0.35663  |           |           |          |              |  |  |  |
| Excited State | 5:    | Triplet-A | 4.1119 eV | 301.53 nm | f=n.d.   | <S**2>=2.000 |  |  |  |
| 109           | ->117 | 0.30927   |           |           |          |              |  |  |  |
| 110           | ->118 | -0.30736  |           |           |          |              |  |  |  |
| 111           | ->116 | -0.20158  |           |           |          |              |  |  |  |
| 111           | ->127 | -0.17999  |           |           |          |              |  |  |  |
| 112           | ->115 | 0.22186   |           |           |          |              |  |  |  |
| 112           | ->129 | 0.17324   |           |           |          |              |  |  |  |
| 113           | ->117 | -0.13228  |           |           |          |              |  |  |  |
| 114           | ->118 | 0.12405   |           |           |          |              |  |  |  |
| Excited State | 6:    | Triplet-A | 4.1120 eV | 301.52 nm | f=n.d.   | <S**2>=2.000 |  |  |  |
| 109           | ->118 | -0.29929  |           |           |          |              |  |  |  |
| 110           | ->117 | 0.31733   |           |           |          |              |  |  |  |
| 111           | ->115 | 0.22236   |           |           |          |              |  |  |  |
| 111           | ->129 | 0.17263   |           |           |          |              |  |  |  |
| 112           | ->116 | -0.20273  |           |           |          |              |  |  |  |
| 112           | ->127 | -0.18121  |           |           |          |              |  |  |  |
| 113           | ->118 | 0.14450   |           |           |          |              |  |  |  |
| 114           | ->117 | -0.11187  |           |           |          |              |  |  |  |
| Excited State | 7:    | Triplet-A | 4.8011 eV | 258.24 nm | f=n.d.   | <S**2>=2.000 |  |  |  |
| 105           | ->115 | 0.12447   |           |           |          |              |  |  |  |
| 105           | ->118 | 0.10115   |           |           |          |              |  |  |  |
| 106           | ->116 | -0.15836  |           |           |          |              |  |  |  |
| 108           | ->135 | -0.14251  |           |           |          |              |  |  |  |
| 111           | ->115 | -0.11862  |           |           |          |              |  |  |  |
| 111           | ->118 | -0.11192  |           |           |          |              |  |  |  |
| 112           | ->116 | 0.13526   |           |           |          |              |  |  |  |
| 113           | ->118 | 0.21427   |           |           |          |              |  |  |  |
| 113           | ->129 | 0.19310   |           |           |          |              |  |  |  |
| 114           | ->116 | -0.11655  |           |           |          |              |  |  |  |
| 114           | ->117 | -0.15175  |           |           |          |              |  |  |  |
| 114           | ->127 | -0.26244  |           |           |          |              |  |  |  |
| 114           | ->139 | 0.11498   |           |           |          |              |  |  |  |
| Excited State | 8:    | Triplet-A | 4.8114 eV | 257.69 nm | f=n.d.   | <S**2>=2.000 |  |  |  |
| 105           | ->116 | -0.14756  |           |           |          |              |  |  |  |
| 106           | ->115 | 0.13178   |           |           |          |              |  |  |  |
| 106           | ->118 | 0.10842   |           |           |          |              |  |  |  |
| 111           | ->116 | 0.14246   |           |           |          |              |  |  |  |
| 112           | ->115 | -0.11777  |           |           |          |              |  |  |  |
| 112           | ->118 | -0.10977  |           |           |          |              |  |  |  |
| 113           | ->116 | -0.12721  |           |           |          |              |  |  |  |
| 113           | ->117 | -0.15549  |           |           |          |              |  |  |  |
| 113           | ->127 | -0.25672  |           |           |          |              |  |  |  |
| 113           | ->139 | 0.11203   |           |           |          |              |  |  |  |
| 114           | ->118 | 0.22983   |           |           |          |              |  |  |  |
| 114           | ->129 | 0.20745   |           |           |          |              |  |  |  |
| 114           | ->147 | 0.10093   |           |           |          |              |  |  |  |
| 114           | ->150 | -0.10132  |           |           |          |              |  |  |  |
| Excited State | 9:    | Singlet-A | 5.0702 eV | 244.54 nm | f=0.7426 | <S**2>=0.000 |  |  |  |
| 112           | ->117 | 0.10438   |           |           |          |              |  |  |  |
| 113           | ->115 | -0.44113  |           |           |          |              |  |  |  |
| 113           | ->118 | -0.11037  |           |           |          |              |  |  |  |
| 114           | ->116 | 0.47680   |           |           |          |              |  |  |  |
| Excited State | 10:   | Triplet-A | 5.0710 eV | 244.49 nm | f=n.d.   | <S**2>=2.000 |  |  |  |
| 109           | ->118 | 0.19797   |           |           |          |              |  |  |  |
| 110           | ->117 | -0.18563  |           |           |          |              |  |  |  |
| 110           | ->139 | 0.13657   |           |           |          |              |  |  |  |
| 111           | ->115 | 0.30164   |           |           |          |              |  |  |  |
| 111           | ->142 | -0.10577  |           |           |          |              |  |  |  |
| 112           | ->116 | -0.27009  |           |           |          |              |  |  |  |
| 112           | ->139 | 0.13492   |           |           |          |              |  |  |  |



|               |       |           |           |           |          |              |  |
|---------------|-------|-----------|-----------|-----------|----------|--------------|--|
| 113           | ->129 | 0.11202   |           |           |          |              |  |
| 114           | ->127 | -0.11753  |           |           |          |              |  |
| Excited State | 11:   | Triplet-A | 5.0716 eV | 244.47 nm | f=n.d.   | <S**2>=2.000 |  |
| 109           | ->116 | -0.10445  |           |           |          |              |  |
| 109           | ->117 | -0.18188  |           |           |          |              |  |
| 109           | ->139 | 0.13761   |           |           |          |              |  |
| 110           | ->118 | 0.20231   |           |           |          |              |  |
| 110           | ->129 | -0.10205  |           |           |          |              |  |
| 111           | ->116 | -0.26875  |           |           |          |              |  |
| 111           | ->139 | 0.13890   |           |           |          |              |  |
| 112           | ->115 | 0.30081   |           |           |          |              |  |
| 112           | ->142 | -0.10593  |           |           |          |              |  |
| 113           | ->127 | -0.12868  |           |           |          |              |  |
| 114           | ->129 | 0.11104   |           |           |          |              |  |
| Excited State | 12:   | Singlet-A | 5.1017 eV | 243.03 nm | f=0.0000 | <S**2>=0.000 |  |
| 111           | ->117 | 0.14068   |           |           |          |              |  |
| 112           | ->118 | -0.13484  |           |           |          |              |  |
| 113           | ->116 | 0.44890   |           |           |          |              |  |
| 114           | ->115 | -0.44126  |           |           |          |              |  |
| 114           | ->118 | -0.12170  |           |           |          |              |  |
| Excited State | 13:   | Triplet-A | 5.1109 eV | 242.59 nm | f=n.d.   | <S**2>=2.000 |  |
| 108           | ->135 | -0.13801  |           |           |          |              |  |
| 109           | ->115 | -0.22307  |           |           |          |              |  |
| 110           | ->116 | 0.21059   |           |           |          |              |  |
| 111           | ->129 | 0.15491   |           |           |          |              |  |
| 112           | ->127 | -0.13567  |           |           |          |              |  |
| 112           | ->139 | -0.12489  |           |           |          |              |  |
| 113           | ->118 | -0.22341  |           |           |          |              |  |
| 114           | ->117 | 0.22355   |           |           |          |              |  |
| Excited State | 14:   | Triplet-A | 5.1175 eV | 242.27 nm | f=n.d.   | <S**2>=2.000 |  |
| 109           | ->116 | 0.21500   |           |           |          |              |  |
| 109           | ->127 | 0.11236   |           |           |          |              |  |
| 110           | ->115 | -0.25036  |           |           |          |              |  |
| 111           | ->117 | 0.10823   |           |           |          |              |  |
| 111           | ->127 | -0.14091  |           |           |          |              |  |
| 111           | ->139 | -0.13078  |           |           |          |              |  |
| 112           | ->118 | -0.10478  |           |           |          |              |  |
| 112           | ->129 | 0.16296   |           |           |          |              |  |
| 113           | ->117 | 0.22444   |           |           |          |              |  |
| 114           | ->118 | -0.20220  |           |           |          |              |  |
| Excited State | 15:   | Triplet-A | 5.2252 eV | 237.28 nm | f=n.d.   | <S**2>=2.000 |  |
| 107           | ->138 | 0.13270   |           |           |          |              |  |
| 107           | ->144 | -0.18881  |           |           |          |              |  |
| 108           | ->131 | -0.10717  |           |           |          |              |  |
| 108           | ->135 | -0.34396  |           |           |          |              |  |
| 108           | ->136 | 0.12979   |           |           |          |              |  |
| 109           | ->115 | 0.13518   |           |           |          |              |  |
| 110           | ->117 | 0.11116   |           |           |          |              |  |
| Excited State | 16:   | Triplet-A | 5.2683 eV | 235.34 nm | f=n.d.   | <S**2>=2.000 |  |
| 105           | ->144 | -0.10193  |           |           |          |              |  |
| 106           | ->135 | -0.15879  |           |           |          |              |  |
| 107           | ->115 | 0.20870   |           |           |          |              |  |
| 107           | ->129 | -0.10382  |           |           |          |              |  |
| 108           | ->116 | -0.26029  |           |           |          |              |  |
| 108           | ->127 | 0.14173   |           |           |          |              |  |
| 110           | ->135 | 0.10181   |           |           |          |              |  |
| 113           | ->138 | -0.13751  |           |           |          |              |  |
| 113           | ->144 | 0.18481   |           |           |          |              |  |
| 114           | ->131 | 0.10234   |           |           |          |              |  |
| 114           | ->135 | 0.32266   |           |           |          |              |  |
| 114           | ->136 | -0.11529  |           |           |          |              |  |
| Excited State | 17:   | Triplet-A | 5.2962 eV | 234.10 nm | f=n.d.   | <S**2>=2.000 |  |
| 97            | ->135 | -0.12698  |           |           |          |              |  |
| 107           | ->135 | 0.29470   |           |           |          |              |  |

|               |       |           |           |           |          |              |
|---------------|-------|-----------|-----------|-----------|----------|--------------|
| 107           | ->136 | -0.11365  |           |           |          |              |
| 108           | ->138 | -0.16523  |           |           |          |              |
| 108           | ->144 | 0.23116   |           |           |          |              |
| 109           | ->117 | -0.10314  |           |           |          |              |
| 113           | ->117 | -0.12255  |           |           |          |              |
| 114           | ->118 | 0.12901   |           |           |          |              |
|               |       |           |           |           |          |              |
| Excited State | 18:   | Triplet-A | 5.3048 eV | 233.72 nm | f=n.d.   | <S**2>=2.000 |
| 105           | ->135 | -0.15345  |           |           |          |              |
| 106           | ->144 | -0.10306  |           |           |          |              |
| 107           | ->116 | -0.22082  |           |           |          |              |
| 107           | ->127 | 0.11807   |           |           |          |              |
| 108           | ->115 | 0.26278   |           |           |          |              |
| 108           | ->129 | -0.12793  |           |           |          |              |
| 109           | ->135 | 0.10482   |           |           |          |              |
| 113           | ->135 | 0.29771   |           |           |          |              |
| 113           | ->136 | -0.10761  |           |           |          |              |
| 114           | ->138 | -0.14927  |           |           |          |              |
| 114           | ->144 | 0.19895   |           |           |          |              |
|               |       |           |           |           |          |              |
| Excited State | 19:   | Singlet-A | 5.4935 eV | 225.69 nm | f=0.3116 | <S**2>=0.000 |
| 109           | ->115 | 0.17072   |           |           |          |              |
| 110           | ->116 | -0.18558  |           |           |          |              |
| 111           | ->115 | 0.28406   |           |           |          |              |
| 111           | ->118 | -0.18494  |           |           |          |              |
| 112           | ->116 | -0.20783  |           |           |          |              |
| 112           | ->117 | 0.26150   |           |           |          |              |
| 113           | ->115 | 0.10250   |           |           |          |              |
| 113           | ->118 | -0.22809  |           |           |          |              |
| 114           | ->117 | 0.21563   |           |           |          |              |
| 114           | ->127 | 0.12594   |           |           |          |              |
|               |       |           |           |           |          |              |
| Excited State | 20:   | Singlet-A | 5.5081 eV | 225.09 nm | f=0.0000 | <S**2>=0.000 |
| 109           | ->116 | -0.18648  |           |           |          |              |
| 110           | ->115 | 0.18875   |           |           |          |              |
| 111           | ->116 | -0.23282  |           |           |          |              |
| 111           | ->117 | 0.22717   |           |           |          |              |
| 112           | ->115 | 0.29800   |           |           |          |              |
| 112           | ->118 | -0.15557  |           |           |          |              |
| 113           | ->117 | 0.21401   |           |           |          |              |
| 113           | ->127 | 0.11995   |           |           |          |              |
| 114           | ->115 | 0.13541   |           |           |          |              |
| 114           | ->118 | -0.20969  |           |           |          |              |
|               |       |           |           |           |          |              |
| Excited State | 21:   | Triplet-A | 5.6408 eV | 219.80 nm | f=n.d.   | <S**2>=2.000 |
| 105           | ->118 | 0.12826   |           |           |          |              |
| 106           | ->117 | -0.14304  |           |           |          |              |
| 108           | ->135 | -0.17718  |           |           |          |              |
| 109           | ->129 | -0.11237  |           |           |          |              |
| 110           | ->127 | 0.10873   |           |           |          |              |
| 113           | ->118 | 0.18764   |           |           |          |              |
| 113           | ->137 | 0.12369   |           |           |          |              |
| 114           | ->117 | -0.23637  |           |           |          |              |
| 114           | ->127 | 0.13078   |           |           |          |              |
| 114           | ->139 | -0.14240  |           |           |          |              |
|               |       |           |           |           |          |              |
| Excited State | 22:   | Triplet-A | 5.6641 eV | 218.90 nm | f=n.d.   | <S**2>=2.000 |
| 105           | ->117 | -0.12950  |           |           |          |              |
| 106           | ->118 | 0.12893   |           |           |          |              |
| 107           | ->135 | -0.16687  |           |           |          |              |
| 108           | ->144 | -0.12890  |           |           |          |              |
| 109           | ->127 | 0.10631   |           |           |          |              |
| 110           | ->129 | -0.10565  |           |           |          |              |
| 111           | ->140 | -0.10220  |           |           |          |              |
| 111           | ->151 | -0.10010  |           |           |          |              |
| 112           | ->142 | -0.10835  |           |           |          |              |
| 113           | ->117 | -0.21779  |           |           |          |              |
| 113           | ->127 | 0.12198   |           |           |          |              |
| 113           | ->139 | -0.14154  |           |           |          |              |
| 114           | ->118 | 0.17587   |           |           |          |              |
| 114           | ->129 | -0.10750  |           |           |          |              |

|               |          |           |           |           |          |              |
|---------------|----------|-----------|-----------|-----------|----------|--------------|
| 114 ->137     | 0.11991  |           |           |           |          |              |
| Excited State | 23:      | Triplet-A | 5.7778 eV | 214.59 nm | f=n.d.   | <S**2>=2.000 |
| 107 ->115     | -0.29946 |           |           |           |          |              |
| 107 ->129     | 0.12500  |           |           |           |          |              |
| 108 ->116     | 0.37077  |           |           |           |          |              |
| 108 ->127     | -0.17271 |           |           |           |          |              |
| 113 ->138     | -0.11359 |           |           |           |          |              |
| 113 ->144     | 0.13947  |           |           |           |          |              |
| 114 ->135     | 0.25671  |           |           |           |          |              |
| Excited State | 24:      | Singlet-A | 5.7782 eV | 214.57 nm | f=0.0000 | <S**2>=0.000 |
| 106 ->135     | -0.15028 |           |           |           |          |              |
| 107 ->115     | -0.17439 |           |           |           |          |              |
| 108 ->116     | 0.21935  |           |           |           |          |              |
| 108 ->127     | -0.10788 |           |           |           |          |              |
| 110 ->135     | 0.10621  |           |           |           |          |              |
| 113 ->138     | -0.16352 |           |           |           |          |              |
| 113 ->144     | 0.20058  |           |           |           |          |              |
| 114 ->131     | 0.11968  |           |           |           |          |              |
| 114 ->135     | 0.37042  |           |           |           |          |              |
| 114 ->136     | -0.12939 |           |           |           |          |              |
| Excited State | 25:      | Triplet-A | 5.7982 eV | 213.83 nm | f=n.d.   | <S**2>=2.000 |
| 107 ->116     | -0.30242 |           |           |           |          |              |
| 107 ->127     | 0.13541  |           |           |           |          |              |
| 108 ->115     | 0.36502  |           |           |           |          |              |
| 108 ->129     | -0.15041 |           |           |           |          |              |
| 113 ->135     | -0.24658 |           |           |           |          |              |
| 114 ->138     | 0.12661  |           |           |           |          |              |
| 114 ->144     | -0.15351 |           |           |           |          |              |

**Table S4** First TD- $\omega$ B97X/6-311++G(d,p) triplet and singlet electronic transitions computed for the hydrogen bonded tetramer of TT-CCH (Figure 6b) at the optimized ground state geometry.

Excitation energies and oscillator strengths:

|               |          |           |           |           |        |              |
|---------------|----------|-----------|-----------|-----------|--------|--------------|
| Excited State | 1:       | Triplet-A | 3.2221 eV | 384.79 nm | f=n.d. | <S**2>=2.000 |
| 225 -> 231    | -0.11473 |           |           |           |        |              |
| 225 -> 232    | -0.11715 |           |           |           |        |              |
| 226 -> 231    | 0.14606  |           |           |           |        |              |
| 226 -> 232    | 0.11314  |           |           |           |        |              |
| 227 -> 230    | -0.11359 |           |           |           |        |              |
| 227 -> 231    | 0.24693  |           |           |           |        |              |
| 227 -> 232    | 0.27163  |           |           |           |        |              |
| 228 -> 231    | 0.29221  |           |           |           |        |              |
| 228 -> 232    | 0.24174  |           |           |           |        |              |
| Excited State | 2:       | Triplet-A | 3.2221 eV | 384.79 nm | f=n.d. | <S**2>=2.000 |
| 225 -> 231    | -0.13252 |           |           |           |        |              |
| 225 -> 232    | 0.10144  |           |           |           |        |              |
| 226 -> 231    | -0.12662 |           |           |           |        |              |
| 226 -> 232    | 0.13026  |           |           |           |        |              |
| 227 -> 230    | 0.10245  |           |           |           |        |              |
| 227 -> 231    | 0.29894  |           |           |           |        |              |
| 227 -> 232    | -0.24644 |           |           |           |        |              |
| 228 -> 230    | -0.10889 |           |           |           |        |              |
| 228 -> 231    | -0.24135 |           |           |           |        |              |
| 228 -> 232    | 0.26527  |           |           |           |        |              |
| Excited State | 3:       | Triplet-A | 3.2375 eV | 382.96 nm | f=n.d. | <S**2>=2.000 |
| 225 -> 230    | 0.33500  |           |           |           |        |              |
| 225 -> 232    | 0.19204  |           |           |           |        |              |
| 226 -> 229    | 0.34829  |           |           |           |        |              |
| 226 -> 231    | -0.11406 |           |           |           |        |              |
| 226 -> 249    | -0.10107 |           |           |           |        |              |
| 227 -> 230    | 0.19767  |           |           |           |        |              |

|                   |           |           |           |        |              |  |
|-------------------|-----------|-----------|-----------|--------|--------------|--|
| 228 -> 229        | -0.21761  |           |           |        |              |  |
| Excited State 4:  | Triplet-A | 3.2377 eV | 382.94 nm | f=n.d. | <S**2>=2.000 |  |
| 225 -> 229        | 0.36273   |           |           |        |              |  |
| 225 -> 231        | -0.11526  |           |           |        |              |  |
| 225 -> 249        | -0.10666  |           |           |        |              |  |
| 226 -> 230        | 0.32057   |           |           |        |              |  |
| 226 -> 232        | 0.18681   |           |           |        |              |  |
| 227 -> 229        | 0.20219   |           |           |        |              |  |
| 228 -> 230        | -0.21139  |           |           |        |              |  |
| Excited State 5:  | Triplet-A | 3.9432 eV | 314.42 nm | f=n.d. | <S**2>=2.000 |  |
| 219 -> 229        | -0.14342  |           |           |        |              |  |
| 220 -> 230        | -0.12444  |           |           |        |              |  |
| 223 -> 238        | 0.36631   |           |           |        |              |  |
| 224 -> 233        | -0.12932  |           |           |        |              |  |
| 224 -> 235        | -0.33946  |           |           |        |              |  |
| 226 -> 235        | 0.10931   |           |           |        |              |  |
| Excited State 6:  | Triplet-A | 3.9444 eV | 314.33 nm | f=n.d. | <S**2>=2.000 |  |
| 219 -> 230        | 0.11588   |           |           |        |              |  |
| 220 -> 229        | 0.15625   |           |           |        |              |  |
| 220 -> 249        | 0.10038   |           |           |        |              |  |
| 223 -> 233        | -0.13037  |           |           |        |              |  |
| 223 -> 235        | -0.34268  |           |           |        |              |  |
| 224 -> 238        | 0.36549   |           |           |        |              |  |
| 226 -> 238        | -0.10543  |           |           |        |              |  |
| Excited State 7:  | Triplet-A | 3.9617 eV | 312.95 nm | f=n.d. | <S**2>=2.000 |  |
| 217 -> 231        | -0.10116  |           |           |        |              |  |
| 218 -> 231        | 0.11136   |           |           |        |              |  |
| 218 -> 232        | -0.10284  |           |           |        |              |  |
| 222 -> 233        | 0.34583   |           |           |        |              |  |
| 222 -> 234        | 0.36550   |           |           |        |              |  |
| 222 -> 235        | -0.12057  |           |           |        |              |  |
| Excited State 8:  | Triplet-A | 3.9617 eV | 312.95 nm | f=n.d. | <S**2>=2.000 |  |
| 217 -> 231        | -0.10278  |           |           |        |              |  |
| 218 -> 231        | -0.10941  |           |           |        |              |  |
| 218 -> 232        | -0.10458  |           |           |        |              |  |
| 221 -> 233        | -0.34852  |           |           |        |              |  |
| 221 -> 234        | 0.36287   |           |           |        |              |  |
| 221 -> 235        | 0.12052   |           |           |        |              |  |
| Excited State 9:  | Triplet-A | 4.1112 eV | 301.58 nm | f=n.d. | <S**2>=2.000 |  |
| 217 -> 235        | 0.14092   |           |           |        |              |  |
| 219 -> 235        | -0.25884  |           |           |        |              |  |
| 220 -> 230        | -0.11706  |           |           |        |              |  |
| 220 -> 238        | -0.27557  |           |           |        |              |  |
| 223 -> 230        | 0.19146   |           |           |        |              |  |
| 223 -> 257        | 0.15024   |           |           |        |              |  |
| 224 -> 229        | -0.20211  |           |           |        |              |  |
| 224 -> 235        | -0.10171  |           |           |        |              |  |
| 224 -> 249        | -0.16486  |           |           |        |              |  |
| 225 -> 238        | -0.10700  |           |           |        |              |  |
| Excited State 10: | Triplet-A | 4.1123 eV | 301.49 nm | f=n.d. | <S**2>=2.000 |  |
| 217 -> 238        | -0.11895  |           |           |        |              |  |
| 218 -> 235        | 0.11274   |           |           |        |              |  |
| 219 -> 230        | 0.10894   |           |           |        |              |  |
| 219 -> 238        | 0.25194   |           |           |        |              |  |
| 220 -> 233        | 0.11114   |           |           |        |              |  |
| 220 -> 235        | 0.26338   |           |           |        |              |  |
| 223 -> 229        | -0.19427  |           |           |        |              |  |
| 223 -> 249        | -0.15811  |           |           |        |              |  |
| 224 -> 230        | 0.18705   |           |           |        |              |  |
| 224 -> 257        | 0.14511   |           |           |        |              |  |
| 225 -> 235        | 0.10314   |           |           |        |              |  |
| Excited State 11: | Triplet-A | 4.1125 eV | 301.48 nm | f=n.d. | <S**2>=2.000 |  |
| 217 -> 233        | -0.24987  |           |           |        |              |  |

|                   |           |           |           |        |              |
|-------------------|-----------|-----------|-----------|--------|--------------|
| 218 -> 234        | 0.28328   |           |           |        |              |
| 219 -> 233        | -0.13643  |           |           |        |              |
| 220 -> 234        | -0.10119  |           |           |        |              |
| 221 -> 232        | -0.14628  |           |           |        |              |
| 221 -> 253        | -0.12433  |           |           |        |              |
| 222 -> 231        | 0.19431   |           |           |        |              |
| 222 -> 232        | -0.12073  |           |           |        |              |
| 222 -> 253        | -0.10277  |           |           |        |              |
| 222 -> 256        | -0.15416  |           |           |        |              |
| 227 -> 234        | -0.10640  |           |           |        |              |
|                   |           |           |           |        |              |
| Excited State 12: | Triplet-A | 4.1125 eV | 301.48 nm | f=n.d. | <S**2>=2.000 |
| 217 -> 234        | -0.24460  |           |           |        |              |
| 218 -> 233        | 0.26717   |           |           |        |              |
| 219 -> 234        | -0.15699  |           |           |        |              |
| 220 -> 235        | 0.10748   |           |           |        |              |
| 221 -> 231        | 0.18847   |           |           |        |              |
| 221 -> 232        | 0.11891   |           |           |        |              |
| 221 -> 253        | 0.10103   |           |           |        |              |
| 221 -> 256        | -0.15017  |           |           |        |              |
| 222 -> 232        | -0.13963  |           |           |        |              |
| 222 -> 253        | -0.11880  |           |           |        |              |
| 228 -> 234        | 0.10084   |           |           |        |              |
|                   |           |           |           |        |              |
| Excited State 13: | Triplet-A | 4.7784 eV | 259.47 nm | f=n.d. | <S**2>=2.000 |
| 211 -> 229        | 0.10386   |           |           |        |              |
| 223 -> 229        | 0.12547   |           |           |        |              |
| 224 -> 238        | 0.12420   |           |           |        |              |
| 225 -> 229        | -0.11613  |           |           |        |              |
| 225 -> 235        | 0.14780   |           |           |        |              |
| 225 -> 249        | -0.18668  |           |           |        |              |
| 226 -> 238        | 0.14382   |           |           |        |              |
| 226 -> 253        | -0.10057  |           |           |        |              |
| 226 -> 257        | -0.18894  |           |           |        |              |
| 227 -> 249        | -0.12030  |           |           |        |              |
| 228 -> 253        | 0.10066   |           |           |        |              |
|                   |           |           |           |        |              |
| Excited State 14: | Triplet-A | 4.7788 eV | 259.45 nm | f=n.d. | <S**2>=2.000 |
| 210 -> 229        | -0.10331  |           |           |        |              |
| 223 -> 238        | 0.11732   |           |           |        |              |
| 224 -> 229        | 0.13082   |           |           |        |              |
| 225 -> 238        | -0.15278  |           |           |        |              |
| 225 -> 253        | 0.10648   |           |           |        |              |
| 225 -> 257        | 0.19487   |           |           |        |              |
| 226 -> 229        | 0.10713   |           |           |        |              |
| 226 -> 235        | -0.13812  |           |           |        |              |
| 226 -> 249        | 0.17952   |           |           |        |              |
| 228 -> 249        | -0.12878  |           |           |        |              |
|                   |           |           |           |        |              |
| Excited State 15: | Triplet-A | 4.8076 eV | 257.89 nm | f=n.d. | <S**2>=2.000 |
| 221 -> 231        | 0.12539   |           |           |        |              |
| 226 -> 253        | -0.11529  |           |           |        |              |
| 227 -> 233        | 0.16313   |           |           |        |              |
| 227 -> 256        | 0.16954   |           |           |        |              |
| 228 -> 234        | -0.14676  |           |           |        |              |
| 228 -> 253        | -0.16793  |           |           |        |              |
|                   |           |           |           |        |              |
| Excited State 16: | Triplet-A | 4.8076 eV | 257.89 nm | f=n.d. | <S**2>=2.000 |
| 209 -> 231        | 0.10085   |           |           |        |              |
| 222 -> 231        | 0.12537   |           |           |        |              |
| 225 -> 253        | -0.10778  |           |           |        |              |
| 227 -> 234        | 0.15075   |           |           |        |              |
| 227 -> 253        | 0.17290   |           |           |        |              |
| 228 -> 233        | -0.15954  |           |           |        |              |
| 228 -> 256        | -0.16599  |           |           |        |              |
|                   |           |           |           |        |              |
| Excited State 17: | Triplet-A | 5.0381 eV | 246.09 nm | f=n.d. | <S**2>=2.000 |
| 219 -> 235        | 0.15170   |           |           |        |              |
| 220 -> 238        | 0.19039   |           |           |        |              |
| 223 -> 230        | 0.25432   |           |           |        |              |
| 223 -> 232        | 0.10506   |           |           |        |              |

|                   |           |           |           |          |              |
|-------------------|-----------|-----------|-----------|----------|--------------|
| 223 -> 295        | -0.10143  |           |           |          |              |
| 224 -> 229        | -0.26096  |           |           |          |              |
| 224 -> 235        | -0.11258  |           |           |          |              |
| 225 -> 238        | 0.10847   |           |           |          |              |
| 226 -> 235        | 0.10931   |           |           |          |              |
| 226 -> 249        | 0.11192   |           |           |          |              |
| Excited State 18: | Triplet-A | 5.0386 eV | 246.07 nm | f=n.d.   | <S**2>=2.000 |
| 219 -> 238        | 0.17416   |           |           |          |              |
| 220 -> 235        | 0.16370   |           |           |          |              |
| 223 -> 229        | 0.25708   |           |           |          |              |
| 223 -> 235        | 0.11638   |           |           |          |              |
| 224 -> 230        | -0.25798  |           |           |          |              |
| 224 -> 232        | -0.10784  |           |           |          |              |
| 224 -> 295        | 0.10027   |           |           |          |              |
| 225 -> 235        | 0.10320   |           |           |          |              |
| 225 -> 249        | 0.10894   |           |           |          |              |
| 226 -> 238        | 0.10960   |           |           |          |              |
| Excited State 19: | Singlet-A | 5.0592 eV | 245.07 nm | f=1.6383 | <S**2>=0.000 |
| 225 -> 230        | 0.31652   |           |           |          |              |
| 226 -> 229        | 0.31614   |           |           |          |              |
| 227 -> 232        | 0.32738   |           |           |          |              |
| 228 -> 231        | 0.31337   |           |           |          |              |
| Excited State 20: | Triplet-A | 5.0698 eV | 244.55 nm | f=n.d.   | <S**2>=2.000 |
| 217 -> 234        | -0.13409  |           |           |          |              |
| 218 -> 233        | 0.14091   |           |           |          |              |
| 218 -> 234        | 0.10478   |           |           |          |              |
| 221 -> 231        | -0.11623  |           |           |          |              |
| 222 -> 230        | -0.13818  |           |           |          |              |
| 222 -> 231        | -0.25193  |           |           |          |              |
| 222 -> 232        | 0.25426   |           |           |          |              |
| 222 -> 273        | -0.10049  |           |           |          |              |
| Excited State 21: | Triplet-A | 5.0698 eV | 244.55 nm | f=n.d.   | <S**2>=2.000 |
| 217 -> 233        | -0.13070  |           |           |          |              |
| 218 -> 233        | -0.10216  |           |           |          |              |
| 218 -> 234        | 0.14441   |           |           |          |              |
| 221 -> 230        | -0.13915  |           |           |          |              |
| 221 -> 231        | 0.25166   |           |           |          |              |
| 221 -> 232        | 0.25451   |           |           |          |              |
| 221 -> 273        | -0.10050  |           |           |          |              |
| 222 -> 231        | -0.11631  |           |           |          |              |
| Excited State 22: | Singlet-A | 5.0765 eV | 244.23 nm | f=0.0000 | <S**2>=0.000 |
| 225 -> 229        | -0.29703  |           |           |          |              |
| 226 -> 230        | -0.28977  |           |           |          |              |
| 227 -> 231        | 0.33742   |           |           |          |              |
| 228 -> 232        | 0.34236   |           |           |          |              |
| Excited State 23: | Singlet-A | 5.1004 eV | 243.09 nm | f=0.0029 | <S**2>=0.000 |
| 225 -> 230        | 0.16797   |           |           |          |              |
| 225 -> 232        | 0.24857   |           |           |          |              |
| 226 -> 229        | 0.21578   |           |           |          |              |
| 226 -> 231        | -0.22444  |           |           |          |              |
| 227 -> 230        | 0.24280   |           |           |          |              |
| 227 -> 232        | -0.20562  |           |           |          |              |
| 228 -> 229        | -0.21593  |           |           |          |              |
| 228 -> 231        | -0.23642  |           |           |          |              |
| Excited State 24: | Singlet-A | 5.1012 eV | 243.05 nm | f=0.0000 | <S**2>=0.000 |
| 223 -> 235        | -0.10391  |           |           |          |              |
| 225 -> 229        | 0.25646   |           |           |          |              |
| 225 -> 231        | -0.20736  |           |           |          |              |
| 226 -> 230        | 0.18085   |           |           |          |              |
| 226 -> 232        | 0.25561   |           |           |          |              |
| 227 -> 229        | 0.21289   |           |           |          |              |
| 227 -> 231        | 0.21604   |           |           |          |              |
| 228 -> 230        | -0.25077  |           |           |          |              |
| 228 -> 232        | 0.16223   |           |           |          |              |

|               |            |           |           |           |        |              |
|---------------|------------|-----------|-----------|-----------|--------|--------------|
| Excited State | 25:        | Triplet-A | 5.1107 eV | 242.60 nm | f=n.d. | <S**2>=2.000 |
|               | 217 -> 230 | -0.13155  |           |           |        |              |
|               | 218 -> 231 | 0.10348   |           |           |        |              |
|               | 219 -> 230 | 0.11808   |           |           |        |              |
|               | 219 -> 232 | 0.12904   |           |           |        |              |
|               | 220 -> 229 | 0.17334   |           |           |        |              |
|               | 223 -> 249 | 0.10808   |           |           |        |              |
|               | 225 -> 233 | 0.10594   |           |           |        |              |
|               | 225 -> 235 | 0.10648   |           |           |        |              |
|               | 226 -> 238 | 0.13498   |           |           |        |              |
|               | 227 -> 235 | 0.10313   |           |           |        |              |
|               | 228 -> 234 | 0.12758   |           |           |        |              |
|               |            |           |           |           |        |              |
| Excited State | 26:        | Triplet-A | 5.1114 eV | 242.56 nm | f=n.d. | <S**2>=2.000 |
|               | 217 -> 229 | 0.11969   |           |           |        |              |
|               | 217 -> 231 | 0.10709   |           |           |        |              |
|               | 218 -> 230 | -0.11390  |           |           |        |              |
|               | 218 -> 232 | 0.10586   |           |           |        |              |
|               | 219 -> 229 | -0.12687  |           |           |        |              |
|               | 219 -> 231 | 0.11024   |           |           |        |              |
|               | 220 -> 230 | -0.12153  |           |           |        |              |
|               | 220 -> 232 | -0.11529  |           |           |        |              |
|               | 225 -> 238 | -0.12184  |           |           |        |              |
|               | 226 -> 233 | -0.11655  |           |           |        |              |
|               | 227 -> 234 | 0.14643   |           |           |        |              |
|               | 228 -> 233 | -0.10318  |           |           |        |              |
|               | 228 -> 235 | 0.10893   |           |           |        |              |
|               |            |           |           |           |        |              |
| Excited State | 27:        | Triplet-A | 5.1159 eV | 242.35 nm | f=n.d. | <S**2>=2.000 |
|               | 217 -> 232 | -0.16950  |           |           |        |              |
|               | 218 -> 231 | -0.17558  |           |           |        |              |
|               | 219 -> 230 | 0.16774   |           |           |        |              |
|               | 220 -> 229 | 0.17167   |           |           |        |              |
|               | 225 -> 235 | 0.11914   |           |           |        |              |
|               | 226 -> 234 | -0.10293  |           |           |        |              |
|               | 227 -> 233 | 0.15798   |           |           |        |              |
|               | 228 -> 234 | -0.13820  |           |           |        |              |
|               |            |           |           |           |        |              |
| Excited State | 28:        | Triplet-A | 5.1164 eV | 242.33 nm | f=n.d. | <S**2>=2.000 |
|               | 217 -> 231 | -0.15645  |           |           |        |              |
|               | 218 -> 232 | -0.15907  |           |           |        |              |
|               | 219 -> 229 | -0.18387  |           |           |        |              |
|               | 220 -> 230 | -0.18275  |           |           |        |              |
|               | 226 -> 235 | -0.13399  |           |           |        |              |
|               | 227 -> 234 | -0.12567  |           |           |        |              |
|               | 228 -> 233 | 0.14451   |           |           |        |              |
|               |            |           |           |           |        |              |
| Excited State | 29:        | Triplet-A | 5.2195 eV | 237.54 nm | f=n.d. | <S**2>=2.000 |
|               | 213 -> 287 | -0.10609  |           |           |        |              |
|               | 214 -> 286 | -0.10103  |           |           |        |              |
|               | 215 -> 264 | 0.12814   |           |           |        |              |
|               | 215 -> 265 | -0.21539  |           |           |        |              |
|               | 216 -> 264 | 0.20961   |           |           |        |              |
|               |            |           |           |           |        |              |
| Excited State | 30:        | Triplet-A | 5.2195 eV | 237.54 nm | f=n.d. | <S**2>=2.000 |
|               | 214 -> 287 | 0.10896   |           |           |        |              |
|               | 215 -> 264 | 0.20962   |           |           |        |              |
|               | 216 -> 264 | -0.12825  |           |           |        |              |
|               | 216 -> 265 | -0.21540  |           |           |        |              |
|               |            |           |           |           |        |              |
| Excited State | 31:        | Triplet-A | 5.2691 eV | 235.31 nm | f=n.d. | <S**2>=2.000 |
|               | 214 -> 230 | -0.10197  |           |           |        |              |
|               | 215 -> 231 | -0.12590  |           |           |        |              |
|               | 215 -> 232 | 0.13493   |           |           |        |              |
|               | 216 -> 231 | -0.10496  |           |           |        |              |
|               | 216 -> 232 | 0.11939   |           |           |        |              |
|               | 227 -> 264 | -0.15716  |           |           |        |              |
|               | 227 -> 265 | 0.14403   |           |           |        |              |
|               | 228 -> 264 | 0.14710   |           |           |        |              |
|               | 228 -> 265 | -0.14301  |           |           |        |              |

|               |            |           |           |           |          |              |
|---------------|------------|-----------|-----------|-----------|----------|--------------|
| Excited State | 32:        | Triplet-A | 5.2691 eV | 235.30 nm | f=n.d.   | <S**2>=2.000 |
|               | 213 -> 230 | -0.10342  |           |           |          |              |
|               | 215 -> 231 | -0.10514  |           |           |          |              |
|               | 215 -> 232 | -0.11973  |           |           |          |              |
|               | 216 -> 231 | 0.12561   |           |           |          |              |
|               | 216 -> 232 | 0.13502   |           |           |          |              |
|               | 227 -> 264 | -0.14558  |           |           |          |              |
|               | 227 -> 265 | -0.14127  |           |           |          |              |
|               | 228 -> 264 | -0.15882  |           |           |          |              |
|               | 228 -> 265 | -0.14556  |           |           |          |              |
|               |            |           |           |           |          |              |
| Excited State | 33:        | Triplet-A | 5.2945 eV | 234.18 nm | f=n.d.   | <S**2>=2.000 |
|               | 213 -> 264 | -0.14665  |           |           |          |              |
|               | 213 -> 265 | 0.13636   |           |           |          |              |
|               | 214 -> 264 | 0.14830   |           |           |          |              |
|               | 214 -> 265 | -0.14394  |           |           |          |              |
|               | 215 -> 274 | 0.10334   |           |           |          |              |
|               | 215 -> 279 | 0.10458   |           |           |          |              |
|               | 215 -> 286 | -0.10630  |           |           |          |              |
|               | 215 -> 287 | 0.10728   |           |           |          |              |
|               |            |           |           |           |          |              |
| Excited State | 34:        | Triplet-A | 5.2946 eV | 234.17 nm | f=n.d.   | <S**2>=2.000 |
|               | 213 -> 264 | 0.14849   |           |           |          |              |
|               | 213 -> 265 | 0.14408   |           |           |          |              |
|               | 214 -> 264 | 0.14654   |           |           |          |              |
|               | 214 -> 265 | 0.13609   |           |           |          |              |
|               | 216 -> 274 | -0.10302  |           |           |          |              |
|               | 216 -> 279 | 0.10455   |           |           |          |              |
|               | 216 -> 287 | -0.11370  |           |           |          |              |
|               |            |           |           |           |          |              |
| Excited State | 35:        | Triplet-A | 5.3059 eV | 233.67 nm | f=n.d.   | <S**2>=2.000 |
|               | 213 -> 232 | 0.10006   |           |           |          |              |
|               | 214 -> 232 | -0.10495  |           |           |          |              |
|               | 215 -> 229 | 0.12294   |           |           |          |              |
|               | 215 -> 230 | 0.13301   |           |           |          |              |
|               | 216 -> 229 | 0.10466   |           |           |          |              |
|               | 216 -> 230 | 0.11616   |           |           |          |              |
|               | 225 -> 264 | -0.14125  |           |           |          |              |
|               | 225 -> 265 | 0.13323   |           |           |          |              |
|               | 226 -> 264 | -0.13999  |           |           |          |              |
|               | 226 -> 265 | 0.13536   |           |           |          |              |
|               |            |           |           |           |          |              |
| Excited State | 36:        | Triplet-A | 5.3060 eV | 233.67 nm | f=n.d.   | <S**2>=2.000 |
|               | 213 -> 232 | 0.10497   |           |           |          |              |
|               | 214 -> 232 | 0.10024   |           |           |          |              |
|               | 215 -> 229 | -0.10290  |           |           |          |              |
|               | 215 -> 230 | 0.11735   |           |           |          |              |
|               | 216 -> 229 | 0.12153   |           |           |          |              |
|               | 216 -> 230 | -0.13490  |           |           |          |              |
|               | 225 -> 264 | 0.13942   |           |           |          |              |
|               | 225 -> 265 | 0.13486   |           |           |          |              |
|               | 226 -> 264 | -0.14196  |           |           |          |              |
|               | 226 -> 265 | -0.13364  |           |           |          |              |
|               |            |           |           |           |          |              |
| Excited State | 37:        | Singlet-A | 5.4820 eV | 226.17 nm | f=0.0000 | <S**2>=0.000 |
|               | 219 -> 230 | 0.13991   |           |           |          |              |
|               | 220 -> 229 | 0.18559   |           |           |          |              |
|               | 223 -> 229 | -0.20941  |           |           |          |              |
|               | 223 -> 235 | -0.21644  |           |           |          |              |
|               | 224 -> 230 | 0.24441   |           |           |          |              |
|               | 224 -> 238 | 0.16706   |           |           |          |              |
|               | 225 -> 235 | -0.16309  |           |           |          |              |
|               | 226 -> 230 | -0.12213  |           |           |          |              |
|               | 226 -> 238 | -0.16542  |           |           |          |              |
|               | 227 -> 235 | -0.10388  |           |           |          |              |
|               |            |           |           |           |          |              |
| Excited State | 38:        | Singlet-A | 5.4838 eV | 226.09 nm | f=0.6481 | <S**2>=0.000 |
|               | 219 -> 229 | -0.13673  |           |           |          |              |
|               | 220 -> 230 | -0.12572  |           |           |          |              |
|               | 221 -> 234 | -0.11674  |           |           |          |              |



|               |     |           |           |           |          |              |  |  |  |
|---------------|-----|-----------|-----------|-----------|----------|--------------|--|--|--|
| 222           | ->  | 231       | -0.10692  |           |          |              |  |  |  |
| 222           | ->  | 233       | -0.10446  |           |          |              |  |  |  |
| 223           | ->  | 230       | 0.19414   |           |          |              |  |  |  |
| 223           | ->  | 238       | 0.16115   |           |          |              |  |  |  |
| 224           | ->  | 229       | -0.16464  |           |          |              |  |  |  |
| 224           | ->  | 235       | -0.18989  |           |          |              |  |  |  |
| 225           | ->  | 238       | 0.16460   |           |          |              |  |  |  |
| 226           | ->  | 233       | 0.12740   |           |          |              |  |  |  |
| 226           | ->  | 235       | 0.16327   |           |          |              |  |  |  |
| 227           | ->  | 234       | -0.11853  |           |          |              |  |  |  |
| 228           | ->  | 235       | -0.13043  |           |          |              |  |  |  |
|               |     |           |           |           |          |              |  |  |  |
| Excited State | 39: | Singlet-A | 5.5039 eV | 225.27 nm | f=0.0000 | <S**2>=0.000 |  |  |  |
| 217           | ->  | 232       | 0.15269   |           |          |              |  |  |  |
| 218           | ->  | 231       | 0.16546   |           |          |              |  |  |  |
| 221           | ->  | 231       | 0.20412   |           |          |              |  |  |  |
| 221           | ->  | 232       | 0.10422   |           |          |              |  |  |  |
| 221           | ->  | 233       | 0.14968   |           |          |              |  |  |  |
| 222           | ->  | 230       | 0.11792   |           |          |              |  |  |  |
| 222           | ->  | 231       | 0.11548   |           |          |              |  |  |  |
| 222           | ->  | 232       | -0.18412  |           |          |              |  |  |  |
| 222           | ->  | 234       | 0.17247   |           |          |              |  |  |  |
| 226           | ->  | 234       | -0.11118  |           |          |              |  |  |  |
| 227           | ->  | 233       | 0.18074   |           |          |              |  |  |  |
| 228           | ->  | 234       | -0.16834  |           |          |              |  |  |  |
|               |     |           |           |           |          |              |  |  |  |
| Excited State | 40: | Singlet-A | 5.5060 eV | 225.18 nm | f=0.0269 | <S**2>=0.000 |  |  |  |
| 217           | ->  | 231       | -0.14475  |           |          |              |  |  |  |
| 218           | ->  | 232       | -0.14898  |           |          |              |  |  |  |
| 219           | ->  | 229       | -0.12191  |           |          |              |  |  |  |
| 220           | ->  | 230       | -0.12295  |           |          |              |  |  |  |
| 221           | ->  | 230       | 0.10215   |           |          |              |  |  |  |
| 221           | ->  | 231       | -0.10323  |           |          |              |  |  |  |
| 221           | ->  | 232       | -0.16627  |           |          |              |  |  |  |
| 221           | ->  | 234       | 0.14869   |           |          |              |  |  |  |
| 222           | ->  | 231       | 0.18288   |           |          |              |  |  |  |
| 222           | ->  | 233       | 0.12835   |           |          |              |  |  |  |
| 223           | ->  | 230       | 0.14490   |           |          |              |  |  |  |
| 224           | ->  | 229       | -0.13275  |           |          |              |  |  |  |
| 226           | ->  | 235       | 0.13882   |           |          |              |  |  |  |
| 227           | ->  | 234       | 0.14859   |           |          |              |  |  |  |
| 228           | ->  | 233       | -0.16754  |           |          |              |  |  |  |
|               |     |           |           |           |          |              |  |  |  |
| Excited State | 41: | Triplet-A | 5.6432 eV | 219.71 nm | f=n.d.   | <S**2>=2.000 |  |  |  |
| 215           | ->  | 264       | -0.11893  |           |          |              |  |  |  |
| 216           | ->  | 265       | 0.11244   |           |          |              |  |  |  |
| 226           | ->  | 238       | 0.10800   |           |          |              |  |  |  |
| 227           | ->  | 233       | -0.12366  |           |          |              |  |  |  |
| 227           | ->  | 235       | 0.11695   |           |          |              |  |  |  |
| 228           | ->  | 234       | 0.16474   |           |          |              |  |  |  |
|               |     |           |           |           |          |              |  |  |  |
| Excited State | 42: | Triplet-A | 5.6435 eV | 219.69 nm | f=n.d.   | <S**2>=2.000 |  |  |  |
| 215           | ->  | 265       | 0.11231   |           |          |              |  |  |  |
| 216           | ->  | 264       | -0.11871  |           |          |              |  |  |  |
| 225           | ->  | 238       | 0.11154   |           |          |              |  |  |  |
| 227           | ->  | 234       | -0.16874  |           |          |              |  |  |  |
| 228           | ->  | 233       | 0.12176   |           |          |              |  |  |  |
| 228           | ->  | 235       | -0.11920  |           |          |              |  |  |  |

**Table S5** First TD- $\omega$ B97X/6-311++G(d,p) triplet and singlet electronic transitions computed for the  $\pi\cdots\pi$  dimer of TT-CCH (Figure 6c) at the optimized ground state geometry.

Excitation energies and oscillator strengths:

|               |    |           |           |           |        |              |  |  |  |
|---------------|----|-----------|-----------|-----------|--------|--------------|--|--|--|
| Excited State | 1: | Triplet-A | 3.2352 eV | 383.23 nm | f=n.d. | <S**2>=2.000 |  |  |  |
| 109           | -> | 115       | -0.10924  |           |        |              |  |  |  |
| 113           | -> | 115       | 0.42638   |           |        |              |  |  |  |
| 113           | -> | 116       | 0.22274   |           |        |              |  |  |  |
| 114           | -> | 115       | -0.37909  |           |        |              |  |  |  |
| 114           | -> | 116       | -0.13068  |           |        |              |  |  |  |

|               |    |           |           |           |        |              |
|---------------|----|-----------|-----------|-----------|--------|--------------|
| Excited State | 2: | Triplet-A | 3.2508 eV | 381.40 nm | f=n.d. | <S**2>=2.000 |
| 113 ->115     |    | -0.18184  |           |           |        |              |
| 113 ->116     |    | 0.30640   |           |           |        |              |
| 114 ->115     |    | -0.18664  |           |           |        |              |
| 114 ->116     |    | 0.47296   |           |           |        |              |
| Excited State | 3: | Triplet-A | 3.9357 eV | 315.02 nm | f=n.d. | <S**2>=2.000 |
| 109 ->116     |    | 0.16651   |           |           |        |              |
| 110 ->115     |    | -0.12474  |           |           |        |              |
| 111 ->120     |    | 0.28394   |           |           |        |              |
| 112 ->117     |    | 0.37028   |           |           |        |              |
| 112 ->120     |    | 0.25213   |           |           |        |              |
| Excited State | 4: | Triplet-A | 3.9464 eV | 314.17 nm | f=n.d. | <S**2>=2.000 |
| 109 ->115     |    | -0.16471  |           |           |        |              |
| 109 ->120     |    | 0.10403   |           |           |        |              |
| 110 ->115     |    | 0.12650   |           |           |        |              |
| 110 ->116     |    | 0.11767   |           |           |        |              |
| 111 ->117     |    | 0.39249   |           |           |        |              |
| 111 ->120     |    | -0.19552  |           |           |        |              |
| 112 ->120     |    | 0.27089   |           |           |        |              |
| Excited State | 5: | Triplet-A | 4.0809 eV | 303.82 nm | f=n.d. | <S**2>=2.000 |
| 109 ->117     |    | 0.27680   |           |           |        |              |
| 110 ->120     |    | 0.26966   |           |           |        |              |
| 111 ->115     |    | -0.18976  |           |           |        |              |
| 111 ->131     |    | -0.11700  |           |           |        |              |
| 112 ->116     |    | 0.20927   |           |           |        |              |
| 112 ->126     |    | -0.13961  |           |           |        |              |
| 113 ->117     |    | 0.17296   |           |           |        |              |
| 114 ->120     |    | 0.13936   |           |           |        |              |
| Excited State | 6: | Triplet-A | 4.0956 eV | 302.72 nm | f=n.d. | <S**2>=2.000 |
| 109 ->120     |    | 0.25003   |           |           |        |              |
| 110 ->117     |    | 0.31376   |           |           |        |              |
| 111 ->115     |    | 0.14673   |           |           |        |              |
| 111 ->116     |    | 0.16056   |           |           |        |              |
| 111 ->126     |    | -0.14000  |           |           |        |              |
| 112 ->115     |    | -0.18196  |           |           |        |              |
| 112 ->131     |    | -0.12555  |           |           |        |              |
| 113 ->120     |    | 0.16309   |           |           |        |              |
| 114 ->117     |    | 0.12848   |           |           |        |              |
| Excited State | 7: | Triplet-A | 4.7964 eV | 258.49 nm | f=n.d. | <S**2>=2.000 |
| 103 ->115     |    | -0.11661  |           |           |        |              |
| 107 ->135     |    | 0.12350   |           |           |        |              |
| 110 ->115     |    | -0.12753  |           |           |        |              |
| 111 ->115     |    | 0.20713   |           |           |        |              |
| 113 ->115     |    | 0.12242   |           |           |        |              |
| 113 ->117     |    | 0.16961   |           |           |        |              |
| 113 ->120     |    | -0.12037  |           |           |        |              |
| 113 ->126     |    | -0.12639  |           |           |        |              |
| 113 ->131     |    | 0.12688   |           |           |        |              |
| 113 ->137     |    | -0.12279  |           |           |        |              |
| 114 ->117     |    | -0.12118  |           |           |        |              |
| 114 ->120     |    | 0.10267   |           |           |        |              |
| 114 ->131     |    | -0.11256  |           |           |        |              |
| Excited State | 8: | Triplet-A | 4.7995 eV | 258.33 nm | f=n.d. | <S**2>=2.000 |
| 100 ->116     |    | -0.10304  |           |           |        |              |
| 104 ->116     |    | 0.10636   |           |           |        |              |
| 111 ->116     |    | 0.11131   |           |           |        |              |
| 112 ->115     |    | -0.10785  |           |           |        |              |
| 112 ->116     |    | 0.21965   |           |           |        |              |
| 113 ->120     |    | -0.11478  |           |           |        |              |
| 114 ->117     |    | -0.15142  |           |           |        |              |
| 114 ->120     |    | -0.14106  |           |           |        |              |
| 114 ->126     |    | 0.14583   |           |           |        |              |
| 114 ->138     |    | -0.12481  |           |           |        |              |

|               |     |           |           |           |          |              |
|---------------|-----|-----------|-----------|-----------|----------|--------------|
| Excited State | 9:  | Triplet-A | 5.0565 eV | 245.20 nm | f=n.d.   | <S**2>=2.000 |
| 109 ->117     |     | -0.16025  |           |           |          |              |
| 110 ->115     |     | 0.16658   |           |           |          |              |
| 110 ->117     |     | 0.13275   |           |           |          |              |
| 110 ->120     |     | -0.12309  |           |           |          |              |
| 110 ->137     |     | -0.12774  |           |           |          |              |
| 111 ->115     |     | -0.30096  |           |           |          |              |
| 111 ->137     |     | 0.12444   |           |           |          |              |
| 112 ->115     |     | 0.15315   |           |           |          |              |
| 112 ->116     |     | 0.14072   |           |           |          |              |
| Excited State | 10: | Singlet-A | 5.0597 eV | 245.04 nm | f=0.0129 | <S**2>=0.000 |
| 111 ->117     |     | -0.11503  |           |           |          |              |
| 113 ->115     |     | 0.46061   |           |           |          |              |
| 114 ->115     |     | -0.22434  |           |           |          |              |
| 114 ->116     |     | -0.39484  |           |           |          |              |
| Excited State | 11: | Triplet-A | 5.0636 eV | 244.85 nm | f=n.d.   | <S**2>=2.000 |
| 109 ->116     |     | -0.12458  |           |           |          |              |
| 109 ->120     |     | -0.13760  |           |           |          |              |
| 110 ->116     |     | -0.12694  |           |           |          |              |
| 110 ->117     |     | -0.12250  |           |           |          |              |
| 111 ->116     |     | 0.14161   |           |           |          |              |
| 112 ->115     |     | -0.19771  |           |           |          |              |
| 112 ->116     |     | 0.30054   |           |           |          |              |
| 112 ->138     |     | 0.17085   |           |           |          |              |
| 112 ->147     |     | -0.10150  |           |           |          |              |
| 114 ->126     |     | -0.11356  |           |           |          |              |
| Excited State | 12: | Triplet-A | 5.0949 eV | 243.35 nm | f=n.d.   | <S**2>=2.000 |
| 109 ->116     |     | -0.14142  |           |           |          |              |
| 109 ->120     |     | 0.11670   |           |           |          |              |
| 109 ->131     |     | 0.10326   |           |           |          |              |
| 110 ->116     |     | -0.12037  |           |           |          |              |
| 113 ->117     |     | 0.11551   |           |           |          |              |
| 113 ->120     |     | 0.15162   |           |           |          |              |
| 114 ->117     |     | 0.16640   |           |           |          |              |
| 114 ->120     |     | 0.16042   |           |           |          |              |
| Excited State | 13: | Triplet-A | 5.1180 eV | 242.25 nm | f=n.d.   | <S**2>=2.000 |
| 109 ->115     |     | -0.15287  |           |           |          |              |
| 110 ->115     |     | 0.20248   |           |           |          |              |
| 111 ->117     |     | -0.10943  |           |           |          |              |
| 111 ->131     |     | 0.12225   |           |           |          |              |
| 113 ->117     |     | 0.19242   |           |           |          |              |
| 113 ->120     |     | -0.13378  |           |           |          |              |
| 114 ->117     |     | -0.16162  |           |           |          |              |
| 114 ->120     |     | 0.14230   |           |           |          |              |
| Excited State | 14: | Singlet-A | 5.1229 eV | 242.02 nm | f=0.3578 | <S**2>=0.000 |
| 111 ->120     |     | -0.12377  |           |           |          |              |
| 112 ->117     |     | -0.14888  |           |           |          |              |
| 113 ->116     |     | -0.37015  |           |           |          |              |
| 114 ->115     |     | 0.39416   |           |           |          |              |
| 114 ->116     |     | -0.31904  |           |           |          |              |
| Excited State | 15: | Triplet-A | 5.2350 eV | 236.84 nm | f=n.d.   | <S**2>=2.000 |
| 97 ->135      |     | -0.13096  |           |           |          |              |
| 107 ->132     |     | -0.12655  |           |           |          |              |
| 107 ->134     |     | 0.16145   |           |           |          |              |
| 107 ->135     |     | -0.28527  |           |           |          |              |
| 108 ->135     |     | -0.11313  |           |           |          |              |
| 108 ->136     |     | 0.11412   |           |           |          |              |
| 114 ->117     |     | -0.10279  |           |           |          |              |
| Excited State | 16: | Triplet-A | 5.2408 eV | 236.58 nm | f=n.d.   | <S**2>=2.000 |
| 98 ->134      |     | -0.10326  |           |           |          |              |
| 107 ->135     |     | -0.17946  |           |           |          |              |
| 108 ->133     |     | -0.15060  |           |           |          |              |
| 108 ->134     |     | 0.23617   |           |           |          |              |
| 108 ->136     |     | -0.20233  |           |           |          |              |

|               |       |           |           |           |          |              |  |
|---------------|-------|-----------|-----------|-----------|----------|--------------|--|
| 109           | ->117 | -0.10010  |           |           |          |              |  |
| 113           | ->117 | 0.10449   |           |           |          |              |  |
| 114           | ->120 | 0.11836   |           |           |          |              |  |
| Excited State | 17:   | Triplet-A | 5.2783 eV | 234.89 nm | f=n.d.   | <S**2>=2.000 |  |
| 103           | ->135 | -0.13348  |           |           |          |              |  |
| 104           | ->135 | 0.10136   |           |           |          |              |  |
| 107           | ->115 | 0.26997   |           |           |          |              |  |
| 107           | ->116 | 0.13308   |           |           |          |              |  |
| 109           | ->135 | 0.10486   |           |           |          |              |  |
| 113           | ->132 | -0.12373  |           |           |          |              |  |
| 113           | ->134 | 0.10795   |           |           |          |              |  |
| 113           | ->135 | -0.25469  |           |           |          |              |  |
| 114           | ->134 | -0.12359  |           |           |          |              |  |
| 114           | ->135 | 0.20076   |           |           |          |              |  |
| Excited State | 18:   | Triplet-A | 5.2899 eV | 234.38 nm | f=n.d.   | <S**2>=2.000 |  |
| 108           | ->115 | -0.10675  |           |           |          |              |  |
| 108           | ->116 | 0.25873   |           |           |          |              |  |
| 113           | ->133 | -0.10436  |           |           |          |              |  |
| 113           | ->134 | 0.15661   |           |           |          |              |  |
| 113           | ->136 | -0.13298  |           |           |          |              |  |
| 114           | ->133 | -0.13990  |           |           |          |              |  |
| 114           | ->134 | 0.19394   |           |           |          |              |  |
| 114           | ->135 | 0.13468   |           |           |          |              |  |
| 114           | ->136 | -0.19507  |           |           |          |              |  |
| Excited State | 19:   | Singlet-A | 5.4563 eV | 227.23 nm | f=0.0038 | <S**2>=0.000 |  |
| 109           | ->115 | -0.11835  |           |           |          |              |  |
| 110           | ->115 | 0.11788   |           |           |          |              |  |
| 110           | ->116 | 0.17888   |           |           |          |              |  |
| 111           | ->115 | -0.16762  |           |           |          |              |  |
| 111           | ->116 | -0.16956  |           |           |          |              |  |
| 111           | ->117 | 0.21407   |           |           |          |              |  |
| 112           | ->115 | 0.27540   |           |           |          |              |  |
| 112           | ->116 | -0.18828  |           |           |          |              |  |
| 112           | ->120 | 0.20490   |           |           |          |              |  |
| 113           | ->120 | 0.14415   |           |           |          |              |  |
| 114           | ->117 | 0.20901   |           |           |          |              |  |
| Excited State | 20:   | Singlet-A | 5.5007 eV | 225.40 nm | f=0.2488 | <S**2>=0.000 |  |
| 109           | ->116 | -0.14552  |           |           |          |              |  |
| 110           | ->115 | 0.20987   |           |           |          |              |  |
| 111           | ->115 | -0.27909  |           |           |          |              |  |
| 111           | ->120 | -0.16095  |           |           |          |              |  |
| 112           | ->116 | 0.29867   |           |           |          |              |  |
| 112           | ->117 | -0.18989  |           |           |          |              |  |
| 113           | ->117 | -0.19549  |           |           |          |              |  |
| 114           | ->115 | -0.10450  |           |           |          |              |  |
| 114           | ->120 | -0.20074  |           |           |          |              |  |
| Excited State | 21:   | Triplet-A | 5.6720 eV | 218.59 nm | f=n.d.   | <S**2>=2.000 |  |
| 103           | ->120 | -0.10357  |           |           |          |              |  |
| 104           | ->117 | -0.11348  |           |           |          |              |  |
| 107           | ->135 | -0.12238  |           |           |          |              |  |
| 112           | ->115 | 0.10564   |           |           |          |              |  |
| 113           | ->117 | -0.10118  |           |           |          |              |  |
| 113           | ->120 | 0.16991   |           |           |          |              |  |
| 113           | ->137 | -0.13367  |           |           |          |              |  |
| 114           | ->117 | 0.16370   |           |           |          |              |  |
| 114           | ->137 | 0.10218   |           |           |          |              |  |
| Excited State | 22:   | Triplet-A | 5.6778 eV | 218.37 nm | f=n.d.   | <S**2>=2.000 |  |
| 104           | ->120 | -0.10287  |           |           |          |              |  |
| 112           | ->116 | -0.10150  |           |           |          |              |  |
| 112           | ->147 | -0.12063  |           |           |          |              |  |
| 113           | ->117 | 0.15650   |           |           |          |              |  |
| 113           | ->138 | -0.13045  |           |           |          |              |  |
| 114           | ->120 | 0.16829   |           |           |          |              |  |
| 114           | ->138 | -0.13356  |           |           |          |              |  |

|               |       |           |           |           |          |              |
|---------------|-------|-----------|-----------|-----------|----------|--------------|
| Excited State | 23:   | Singlet-A | 5.7678 eV | 214.96 nm | f=0.0003 | <S**2>=0.000 |
| 104           | ->135 | 0.11568   |           |           |          |              |
| 107           | ->115 | -0.16874  |           |           |          |              |
| 110           | ->135 | -0.10207  |           |           |          |              |
| 113           | ->129 | 0.10046   |           |           |          |              |
| 113           | ->134 | 0.20510   |           |           |          |              |
| 113           | ->135 | -0.21661  |           |           |          |              |
| 114           | ->132 | 0.15620   |           |           |          |              |
| 114           | ->135 | 0.28366   |           |           |          |              |
| 114           | ->136 | -0.12094  |           |           |          |              |
| Excited State | 24:   | Singlet-A | 5.7759 eV | 214.66 nm | f=0.0010 | <S**2>=0.000 |
| 103           | ->135 | 0.10276   |           |           |          |              |
| 104           | ->134 | 0.10356   |           |           |          |              |
| 108           | ->116 | -0.13206  |           |           |          |              |
| 113           | ->132 | 0.12897   |           |           |          |              |
| 113           | ->135 | 0.21915   |           |           |          |              |
| 113           | ->136 | -0.15486  |           |           |          |              |
| 114           | ->133 | -0.16552  |           |           |          |              |
| 114           | ->134 | 0.28471   |           |           |          |              |
| 114           | ->136 | -0.19563  |           |           |          |              |
| Excited State | 25:   | Triplet-A | 5.7949 eV | 213.96 nm | f=n.d.   | <S**2>=2.000 |
| 107           | ->115 | 0.41800   |           |           |          |              |
| 107           | ->116 | 0.18671   |           |           |          |              |
| 107           | ->131 | -0.10661  |           |           |          |              |
| 113           | ->135 | 0.17152   |           |           |          |              |
| 114           | ->135 | -0.15338  |           |           |          |              |
| Excited State | 26:   | Singlet-A | 5.8065 eV | 213.53 nm | f=0.0035 | <S**2>=0.000 |
| 109           | ->115 | -0.14791  |           |           |          |              |
| 109           | ->120 | 0.14310   |           |           |          |              |
| 111           | ->115 | 0.16293   |           |           |          |              |
| 111           | ->116 | 0.27486   |           |           |          |              |
| 111           | ->117 | 0.36074   |           |           |          |              |
| 112           | ->115 | -0.25629  |           |           |          |              |
| 112           | ->116 | 0.12322   |           |           |          |              |
| 112           | ->120 | 0.26030   |           |           |          |              |
| Excited State | 27:   | Triplet-A | 5.8274 eV | 212.76 nm | f=n.d.   | <S**2>=2.000 |
| 108           | ->115 | -0.20450  |           |           |          |              |
| 108           | ->116 | 0.43991   |           |           |          |              |
| 108           | ->129 | -0.10169  |           |           |          |              |
| 114           | ->134 | -0.15024  |           |           |          |              |
| 114           | ->136 | 0.13301   |           |           |          |              |
| Excited State | 28:   | Singlet-A | 5.8466 eV | 212.06 nm | f=0.3741 | <S**2>=0.000 |
| 109           | ->116 | 0.15800   |           |           |          |              |
| 110           | ->115 | -0.13510  |           |           |          |              |
| 111           | ->115 | -0.24195  |           |           |          |              |
| 111           | ->120 | 0.27704   |           |           |          |              |
| 112           | ->116 | 0.20244   |           |           |          |              |
| 112           | ->117 | 0.33195   |           |           |          |              |
| 112           | ->120 | 0.14362   |           |           |          |              |
| 113           | ->117 | -0.16135  |           |           |          |              |
| 114           | ->120 | -0.13795  |           |           |          |              |
| Excited State | 29:   | Triplet-A | 5.8915 eV | 210.45 nm | f=n.d.   | <S**2>=2.000 |
| 96            | ->115 | -0.13383  |           |           |          |              |
| 103           | ->115 | -0.10475  |           |           |          |              |
| 104           | ->115 | 0.11586   |           |           |          |              |
| 107           | ->135 | -0.15344  |           |           |          |              |
| 110           | ->120 | 0.10740   |           |           |          |              |
| 110           | ->137 | -0.14781  |           |           |          |              |
| 111           | ->115 | 0.12645   |           |           |          |              |
| Excited State | 30:   | Triplet-A | 5.8948 eV | 210.33 nm | f=n.d.   | <S**2>=2.000 |
| 94            | ->116 | -0.11753  |           |           |          |              |
| 96            | ->116 | 0.13502   |           |           |          |              |
| 100           | ->116 | 0.10949   |           |           |          |              |
| 104           | ->116 | -0.12586  |           |           |          |              |

|           |          |
|-----------|----------|
| 108 ->134 | 0.10998  |
| 108 ->136 | -0.10408 |
| 109 ->138 | -0.13599 |
| 110 ->138 | -0.12901 |
| 112 ->138 | 0.11751  |
| 112 ->147 | -0.11652 |
| 114 ->117 | -0.10923 |

**Table S6** First TD- $\omega$ B97X/6-311++G(d,p) triplet and singlet electronic transitions computed for the  $\pi\cdots\pi$  tetramer of TT-CCH (Figure 6d) at the optimized ground state geometry.

Excitation energies and oscillator strengths:

|               |    |           |           |           |        |              |
|---------------|----|-----------|-----------|-----------|--------|--------------|
| Excited State | 1: | Triplet-A | 3.2367 eV | 383.06 nm | f=n.d. | <S**2>=2.000 |
| 225 -> 229    |    | 0.17936   |           |           |        |              |
| 225 -> 230    |    | 0.25012   |           |           |        |              |
| 225 -> 231    |    | -0.22809  |           |           |        |              |
| 225 -> 232    |    | 0.10529   |           |           |        |              |
| 226 -> 229    |    | -0.17928  |           |           |        |              |
| 226 -> 230    |    | -0.20565  |           |           |        |              |
| 227 -> 229    |    | 0.27545   |           |           |        |              |
| 227 -> 230    |    | 0.15009   |           |           |        |              |
| 228 -> 229    |    | -0.21392  |           |           |        |              |
|               |    |           |           |           |        |              |
| Excited State | 2: | Triplet-A | 3.2398 eV | 382.69 nm | f=n.d. | <S**2>=2.000 |
| 225 -> 229    |    | -0.17259  |           |           |        |              |
| 225 -> 230    |    | -0.13968  |           |           |        |              |
| 225 -> 232    |    | 0.12774   |           |           |        |              |
| 226 -> 229    |    | 0.16975   |           |           |        |              |
| 226 -> 231    |    | -0.10341  |           |           |        |              |
| 226 -> 232    |    | 0.20432   |           |           |        |              |
| 227 -> 231    |    | 0.20391   |           |           |        |              |
| 227 -> 232    |    | -0.11610  |           |           |        |              |
| 228 -> 229    |    | -0.20913  |           |           |        |              |
| 228 -> 230    |    | 0.30360   |           |           |        |              |
| 228 -> 232    |    | -0.12019  |           |           |        |              |
|               |    |           |           |           |        |              |
| Excited State | 3: | Triplet-A | 3.2426 eV | 382.36 nm | f=n.d. | <S**2>=2.000 |
| 225 -> 229    |    | 0.26246   |           |           |        |              |
| 225 -> 231    |    | 0.10699   |           |           |        |              |
| 226 -> 230    |    | -0.19245  |           |           |        |              |
| 226 -> 232    |    | 0.13865   |           |           |        |              |
| 227 -> 229    |    | -0.15373  |           |           |        |              |
| 227 -> 230    |    | 0.16094   |           |           |        |              |
| 227 -> 231    |    | -0.17053  |           |           |        |              |
| 228 -> 230    |    | 0.10877   |           |           |        |              |
| 228 -> 231    |    | 0.25709   |           |           |        |              |
| 228 -> 232    |    | -0.25456  |           |           |        |              |
|               |    |           |           |           |        |              |
| Excited State | 4: | Triplet-A | 3.2525 eV | 381.20 nm | f=n.d. | <S**2>=2.000 |
| 226 -> 230    |    | 0.15152   |           |           |        |              |
| 226 -> 231    |    | 0.22224   |           |           |        |              |
| 226 -> 232    |    | 0.21608   |           |           |        |              |
| 227 -> 230    |    | 0.14042   |           |           |        |              |
| 227 -> 231    |    | 0.24655   |           |           |        |              |
| 227 -> 232    |    | 0.27687   |           |           |        |              |
| 228 -> 231    |    | 0.17243   |           |           |        |              |
| 228 -> 232    |    | 0.23006   |           |           |        |              |
|               |    |           |           |           |        |              |
| Excited State | 5: | Triplet-A | 3.9335 eV | 315.20 nm | f=n.d. | <S**2>=2.000 |
| 219 -> 232    |    | 0.10158   |           |           |        |              |
| 220 -> 230    |    | -0.11163  |           |           |        |              |
| 222 -> 238    |    | 0.18235   |           |           |        |              |
| 222 -> 241    |    | -0.26612  |           |           |        |              |
| 223 -> 235    |    | 0.16957   |           |           |        |              |
| 223 -> 238    |    | 0.16783   |           |           |        |              |
| 224 -> 233    |    | -0.20355  |           |           |        |              |
| 224 -> 235    |    | 0.22559   |           |           |        |              |
|               |    |           |           |           |        |              |
| Excited State | 6: | Triplet-A | 3.9389 eV | 314.77 nm | f=n.d. | <S**2>=2.000 |

|               |          |           |           |           |        |              |
|---------------|----------|-----------|-----------|-----------|--------|--------------|
| 217 -> 231    | -0.10843 |           |           |           |        |              |
| 221 -> 235    | -0.10875 |           |           |           |        |              |
| 221 -> 238    | 0.15267  |           |           |           |        |              |
| 221 -> 241    | 0.10105  |           |           |           |        |              |
| 222 -> 235    | -0.17661 |           |           |           |        |              |
| 222 -> 238    | -0.13832 |           |           |           |        |              |
| 223 -> 233    | 0.25603  |           |           |           |        |              |
| 223 -> 241    | 0.19455  |           |           |           |        |              |
| 224 -> 233    | -0.13940 |           |           |           |        |              |
| 224 -> 238    | -0.14509 |           |           |           |        |              |
|               |          |           |           |           |        |              |
| Excited State | 7:       | Triplet-A | 3.9432 eV | 314.43 nm | f=n.d. | <S**2>=2.000 |
| 218 -> 229    | 0.11505  |           |           |           |        |              |
| 220 -> 232    | 0.10092  |           |           |           |        |              |
| 221 -> 233    | 0.12596  |           |           |           |        |              |
| 221 -> 235    | 0.17301  |           |           |           |        |              |
| 221 -> 238    | -0.15019 |           |           |           |        |              |
| 222 -> 233    | 0.19601  |           |           |           |        |              |
| 222 -> 235    | -0.17525 |           |           |           |        |              |
| 224 -> 235    | 0.11975  |           |           |           |        |              |
| 224 -> 241    | 0.23208  |           |           |           |        |              |
|               |          |           |           |           |        |              |
| Excited State | 8:       | Triplet-A | 3.9461 eV | 314.19 nm | f=n.d. | <S**2>=2.000 |
| 217 -> 229    | -0.14849 |           |           |           |        |              |
| 218 -> 230    | 0.11853  |           |           |           |        |              |
| 221 -> 233    | 0.25649  |           |           |           |        |              |
| 221 -> 235    | 0.22131  |           |           |           |        |              |
| 221 -> 238    | -0.11595 |           |           |           |        |              |
| 222 -> 233    | -0.11425 |           |           |           |        |              |
| 223 -> 233    | 0.11535  |           |           |           |        |              |
| 223 -> 238    | 0.18714  |           |           |           |        |              |
| 224 -> 241    | -0.15970 |           |           |           |        |              |
|               |          |           |           |           |        |              |
| Excited State | 9:       | Triplet-A | 4.0753 eV | 304.23 nm | f=n.d. | <S**2>=2.000 |
| 217 -> 233    | -0.13380 |           |           |           |        |              |
| 218 -> 235    | 0.11570  |           |           |           |        |              |
| 219 -> 235    | 0.16441  |           |           |           |        |              |
| 219 -> 238    | 0.13420  |           |           |           |        |              |
| 220 -> 238    | -0.11138 |           |           |           |        |              |
| 220 -> 241    | 0.21152  |           |           |           |        |              |
| 222 -> 230    | 0.14821  |           |           |           |        |              |
| 222 -> 258    | -0.10209 |           |           |           |        |              |
| 223 -> 231    | 0.11936  |           |           |           |        |              |
| 224 -> 232    | 0.13883  |           |           |           |        |              |
| 224 -> 249    | -0.10620 |           |           |           |        |              |
| 225 -> 233    | -0.10818 |           |           |           |        |              |
| 226 -> 235    | 0.12724  |           |           |           |        |              |
|               |          |           |           |           |        |              |
| Excited State | 10:      | Triplet-A | 4.0827 eV | 303.68 nm | f=n.d. | <S**2>=2.000 |
| 217 -> 233    | -0.17780 |           |           |           |        |              |
| 217 -> 235    | -0.11741 |           |           |           |        |              |
| 218 -> 238    | -0.17362 |           |           |           |        |              |
| 219 -> 241    | 0.14187  |           |           |           |        |              |
| 220 -> 238    | 0.11502  |           |           |           |        |              |
| 221 -> 229    | 0.14773  |           |           |           |        |              |
| 222 -> 231    | -0.11685 |           |           |           |        |              |
| 223 -> 250    | 0.10444  |           |           |           |        |              |
| 225 -> 233    | -0.12551 |           |           |           |        |              |
|               |          |           |           |           |        |              |
| Excited State | 11:      | Triplet-A | 4.0915 eV | 303.03 nm | f=n.d. | <S**2>=2.000 |
| 217 -> 235    | -0.11066 |           |           |           |        |              |
| 217 -> 238    | 0.12997  |           |           |           |        |              |
| 218 -> 233    | 0.17349  |           |           |           |        |              |
| 218 -> 235    | 0.11561  |           |           |           |        |              |
| 218 -> 241    | -0.10973 |           |           |           |        |              |
| 219 -> 241    | -0.12404 |           |           |           |        |              |
| 220 -> 235    | -0.16272 |           |           |           |        |              |
| 221 -> 229    | 0.10823  |           |           |           |        |              |
| 221 -> 230    | 0.12194  |           |           |           |        |              |
| 221 -> 250    | -0.11217 |           |           |           |        |              |
| 222 -> 232    | 0.10293  |           |           |           |        |              |

|                   |           |           |           |          |              |  |
|-------------------|-----------|-----------|-----------|----------|--------------|--|
| 224 -> 230        | 0.11807   |           |           |          |              |  |
| 226 -> 241        | -0.10718  |           |           |          |              |  |
| Excited State 12: | Triplet-A | 4.0997 eV | 302.42 nm | f=n.d.   | <S**2>=2.000 |  |
| 217 -> 238        | -0.11613  |           |           |          |              |  |
| 217 -> 241        | -0.15412  |           |           |          |              |  |
| 218 -> 233        | -0.10157  |           |           |          |              |  |
| 218 -> 235        | -0.13022  |           |           |          |              |  |
| 219 -> 233        | 0.14019   |           |           |          |              |  |
| 219 -> 238        | 0.10534   |           |           |          |              |  |
| 220 -> 233        | 0.15802   |           |           |          |              |  |
| 220 -> 235        | -0.10768  |           |           |          |              |  |
| 222 -> 232        | 0.10781   |           |           |          |              |  |
| 223 -> 229        | 0.10789   |           |           |          |              |  |
| 223 -> 231        | 0.10812   |           |           |          |              |  |
| 224 -> 229        | -0.12078  |           |           |          |              |  |
| 224 -> 230        | 0.10646   |           |           |          |              |  |
| 225 -> 241        | -0.12617  |           |           |          |              |  |
| Excited State 13: | Triplet-A | 4.7728 eV | 259.77 nm | f=n.d.   | <S**2>=2.000 |  |
| 222 -> 229        | -0.10050  |           |           |          |              |  |
| 223 -> 229        | 0.12216   |           |           |          |              |  |
| 223 -> 231        | 0.12619   |           |           |          |              |  |
| 225 -> 233        | 0.12336   |           |           |          |              |  |
| 227 -> 233        | -0.10296  |           |           |          |              |  |
| 228 -> 241        | 0.11361   |           |           |          |              |  |
| Excited State 14: | Triplet-A | 4.7756 eV | 259.62 nm | f=n.d.   | <S**2>=2.000 |  |
| 222 -> 232        | 0.10250   |           |           |          |              |  |
| 224 -> 230        | 0.11666   |           |           |          |              |  |
| 225 -> 229        | 0.10855   |           |           |          |              |  |
| 228 -> 233        | 0.13324   |           |           |          |              |  |
| Excited State 15: | Triplet-A | 4.7940 eV | 258.62 nm | f=n.d.   | <S**2>=2.000 |  |
| 213 -> 265        | -0.10074  |           |           |          |              |  |
| 221 -> 229        | 0.16299   |           |           |          |              |  |
| 221 -> 230        | 0.15269   |           |           |          |              |  |
| 225 -> 233        | 0.10194   |           |           |          |              |  |
| 225 -> 235        | 0.11527   |           |           |          |              |  |
| 225 -> 250        | 0.11641   |           |           |          |              |  |
| Excited State 16: | Triplet-A | 4.7994 eV | 258.33 nm | f=n.d.   | <S**2>=2.000 |  |
| 222 -> 231        | -0.11821  |           |           |          |              |  |
| 222 -> 232        | -0.11993  |           |           |          |              |  |
| 223 -> 231        | -0.10409  |           |           |          |              |  |
| 223 -> 232        | -0.10502  |           |           |          |              |  |
| 227 -> 253        | 0.10325   |           |           |          |              |  |
| Excited State 17: | Singlet-A | 5.0307 eV | 246.45 nm | f=0.0007 | <S**2>=0.000 |  |
| 225 -> 229        | -0.28588  |           |           |          |              |  |
| 226 -> 230        | 0.25260   |           |           |          |              |  |
| 227 -> 229        | 0.11276   |           |           |          |              |  |
| 227 -> 230        | -0.14633  |           |           |          |              |  |
| 227 -> 231        | 0.24489   |           |           |          |              |  |
| 228 -> 231        | -0.20897  |           |           |          |              |  |
| 228 -> 232        | 0.31839   |           |           |          |              |  |
| Excited State 18: | Triplet-A | 5.0350 eV | 246.25 nm | f=n.d.   | <S**2>=2.000 |  |
| 220 -> 230        | -0.10348  |           |           |          |              |  |
| 222 -> 229        | 0.10278   |           |           |          |              |  |
| 222 -> 230        | -0.11983  |           |           |          |              |  |
| 223 -> 229        | -0.10178  |           |           |          |              |  |
| 223 -> 231        | -0.10286  |           |           |          |              |  |
| 224 -> 230        | 0.14852   |           |           |          |              |  |
| 224 -> 232        | -0.17545  |           |           |          |              |  |
| Excited State 19: | Triplet-A | 5.0372 eV | 246.14 nm | f=n.d.   | <S**2>=2.000 |  |
| 223 -> 229        | -0.15713  |           |           |          |              |  |
| 223 -> 231        | -0.15413  |           |           |          |              |  |
| 224 -> 229        | 0.15383   |           |           |          |              |  |
| 224 -> 230        | -0.13463  |           |           |          |              |  |



|               |            |           |           |           |          |              |
|---------------|------------|-----------|-----------|-----------|----------|--------------|
| Excited State | 20:        | Triplet-A | 5.0550 eV | 245.27 nm | f=n.d.   | <S**2>=2.000 |
|               | 218 -> 230 | 0.10489   |           |           |          |              |
|               | 218 -> 233 | -0.11080  |           |           |          |              |
|               | 218 -> 235 | -0.11394  |           |           |          |              |
|               | 221 -> 229 | 0.25038   |           |           |          |              |
|               | 221 -> 230 | 0.22114   |           |           |          |              |
|               | 221 -> 231 | -0.11746  |           |           |          |              |
|               | 221 -> 271 | 0.10650   |           |           |          |              |
| Excited State | 21:        | Triplet-A | 5.0600 eV | 245.03 nm | f=n.d.   | <S**2>=2.000 |
|               | 220 -> 235 | 0.10273   |           |           |          |              |
|               | 222 -> 231 | 0.13904   |           |           |          |              |
|               | 222 -> 232 | 0.16212   |           |           |          |              |
|               | 223 -> 231 | 0.13807   |           |           |          |              |
|               | 223 -> 232 | 0.14047   |           |           |          |              |
|               | 224 -> 230 | 0.10614   |           |           |          |              |
|               | 224 -> 231 | 0.13999   |           |           |          |              |
|               | 224 -> 232 | 0.12272   |           |           |          |              |
| Excited State | 22:        | Singlet-A | 5.0611 eV | 244.98 nm | f=0.0018 | <S**2>=0.000 |
|               | 225 -> 229 | -0.19901  |           |           |          |              |
|               | 225 -> 230 | -0.20700  |           |           |          |              |
|               | 226 -> 229 | 0.23545   |           |           |          |              |
|               | 226 -> 231 | -0.19481  |           |           |          |              |
|               | 227 -> 230 | -0.15639  |           |           |          |              |
|               | 227 -> 232 | -0.21185  |           |           |          |              |
|               | 228 -> 229 | -0.13031  |           |           |          |              |
|               | 228 -> 230 | 0.24655   |           |           |          |              |
|               | 228 -> 231 | -0.13880  |           |           |          |              |
|               | 228 -> 232 | -0.18004  |           |           |          |              |
| Excited State | 23:        | Triplet-A | 5.0874 eV | 243.71 nm | f=n.d.   | <S**2>=2.000 |
|               | 220 -> 232 | 0.11670   |           |           |          |              |
|               | 224 -> 241 | -0.10151  |           |           |          |              |
|               | 226 -> 241 | -0.12154  |           |           |          |              |
|               | 228 -> 233 | -0.13141  |           |           |          |              |
|               | 228 -> 235 | 0.12682   |           |           |          |              |
| Excited State | 24:        | Triplet-A | 5.0903 eV | 243.57 nm | f=n.d.   | <S**2>=2.000 |
|               | 219 -> 232 | -0.11056  |           |           |          |              |
|               | 220 -> 230 | 0.11474   |           |           |          |              |
|               | 220 -> 231 | 0.11393   |           |           |          |              |
|               | 226 -> 235 | 0.12665   |           |           |          |              |
|               | 227 -> 238 | 0.10117   |           |           |          |              |
|               | 227 -> 241 | -0.10880  |           |           |          |              |
| Excited State | 25:        | Triplet-A | 5.0928 eV | 243.45 nm | f=n.d.   | <S**2>=2.000 |
|               | 217 -> 229 | 0.10642   |           |           |          |              |
|               | 217 -> 250 | 0.10182   |           |           |          |              |
|               | 227 -> 233 | 0.11951   |           |           |          |              |
| Excited State | 26:        | Singlet-A | 5.0950 eV | 243.34 nm | f=0.2046 | <S**2>=0.000 |
|               | 225 -> 230 | 0.19372   |           |           |          |              |
|               | 225 -> 231 | -0.24821  |           |           |          |              |
|               | 225 -> 232 | 0.10840   |           |           |          |              |
|               | 226 -> 229 | -0.12589  |           |           |          |              |
|               | 226 -> 230 | -0.22046  |           |           |          |              |
|               | 227 -> 229 | 0.31458   |           |           |          |              |
|               | 227 -> 232 | -0.13793  |           |           |          |              |
|               | 228 -> 229 | -0.25325  |           |           |          |              |
|               | 228 -> 231 | -0.13678  |           |           |          |              |
| Excited State | 27:        | Triplet-A | 5.1167 eV | 242.31 nm | f=n.d.   | <S**2>=2.000 |
|               | 217 -> 229 | -0.11118  |           |           |          |              |
|               | 217 -> 230 | -0.10587  |           |           |          |              |
|               | 218 -> 229 | 0.15224   |           |           |          |              |
|               | 218 -> 230 | 0.12921   |           |           |          |              |
|               | 221 -> 250 | 0.11382   |           |           |          |              |
|               | 221 -> 255 | 0.11009   |           |           |          |              |
|               | 221 -> 256 | -0.10258  |           |           |          |              |

|                   |           |           |           |          |              |  |
|-------------------|-----------|-----------|-----------|----------|--------------|--|
| 225 -> 233        | -0.11186  |           |           |          |              |  |
| 225 -> 235        | -0.11555  |           |           |          |              |  |
| Excited State 28: | Singlet-A | 5.1191 eV | 242.20 nm | f=0.4661 | <S**2>=0.000 |  |
| 222 -> 241        | -0.10228  |           |           |          |              |  |
| 225 -> 232        | 0.10162   |           |           |          |              |  |
| 226 -> 231        | 0.17643   |           |           |          |              |  |
| 226 -> 232        | 0.28624   |           |           |          |              |  |
| 227 -> 230        | 0.18590   |           |           |          |              |  |
| 227 -> 231        | 0.26949   |           |           |          |              |  |
| 227 -> 232        | 0.17994   |           |           |          |              |  |
| 228 -> 229        | -0.17352  |           |           |          |              |  |
| 228 -> 230        | 0.24196   |           |           |          |              |  |
| 228 -> 231        | 0.16951   |           |           |          |              |  |
| Excited State 29: | Triplet-A | 5.2285 eV | 237.13 nm | f=n.d.   | <S**2>=2.000 |  |
| 214 -> 262        | -0.12080  |           |           |          |              |  |
| 214 -> 263        | -0.14470  |           |           |          |              |  |
| 214 -> 265        | -0.10938  |           |           |          |              |  |
| 216 -> 262        | -0.16034  |           |           |          |              |  |
| Excited State 30: | Triplet-A | 5.2327 eV | 236.94 nm | f=n.d.   | <S**2>=2.000 |  |
| 213 -> 265        | 0.12755   |           |           |          |              |  |
| 214 -> 262        | 0.12779   |           |           |          |              |  |
| 215 -> 263        | -0.10128  |           |           |          |              |  |
| 216 -> 262        | -0.12998  |           |           |          |              |  |
| 216 -> 263        | 0.11078   |           |           |          |              |  |
| 216 -> 266        | 0.12562   |           |           |          |              |  |
| Excited State 31: | Triplet-A | 5.2371 eV | 236.74 nm | f=n.d.   | <S**2>=2.000 |  |
| 213 -> 261        | -0.13052  |           |           |          |              |  |
| 213 -> 263        | -0.12452  |           |           |          |              |  |
| 213 -> 265        | 0.24009   |           |           |          |              |  |
| 214 -> 262        | -0.11610  |           |           |          |              |  |
| Excited State 32: | Triplet-A | 5.2410 eV | 236.57 nm | f=n.d.   | <S**2>=2.000 |  |
| 196 -> 264        | 0.14659   |           |           |          |              |  |
| 215 -> 262        | 0.11703   |           |           |          |              |  |
| 215 -> 264        | -0.26485  |           |           |          |              |  |
| 215 -> 266        | -0.12996  |           |           |          |              |  |
| 216 -> 263        | 0.12296   |           |           |          |              |  |
| 216 -> 264        | -0.15540  |           |           |          |              |  |
| Excited State 33: | Triplet-A | 5.2790 eV | 234.86 nm | f=n.d.   | <S**2>=2.000 |  |
| 213 -> 229        | 0.18062   |           |           |          |              |  |
| 213 -> 230        | 0.17790   |           |           |          |              |  |
| 213 -> 231        | -0.10574  |           |           |          |              |  |
| 225 -> 261        | 0.11214   |           |           |          |              |  |
| 225 -> 265        | -0.18086  |           |           |          |              |  |
| 226 -> 265        | 0.13023   |           |           |          |              |  |
| 228 -> 263        | -0.10831  |           |           |          |              |  |
| Excited State 34: | Triplet-A | 5.2800 eV | 234.82 nm | f=n.d.   | <S**2>=2.000 |  |
| 215 -> 232        | 0.10273   |           |           |          |              |  |
| 216 -> 230        | 0.14961   |           |           |          |              |  |
| 216 -> 232        | -0.12559  |           |           |          |              |  |
| 226 -> 262        | 0.12159   |           |           |          |              |  |
| 226 -> 263        | -0.11556  |           |           |          |              |  |
| 228 -> 262        | -0.12457  |           |           |          |              |  |
| 228 -> 263        | 0.15030   |           |           |          |              |  |
| 228 -> 265        | 0.10460   |           |           |          |              |  |
| 228 -> 266        | 0.11997   |           |           |          |              |  |
| Excited State 35: | Triplet-A | 5.2821 eV | 234.73 nm | f=n.d.   | <S**2>=2.000 |  |
| 214 -> 229        | 0.15657   |           |           |          |              |  |
| 214 -> 231        | 0.16851   |           |           |          |              |  |
| 225 -> 263        | -0.12811  |           |           |          |              |  |
| 227 -> 265        | 0.11213   |           |           |          |              |  |
| 228 -> 262        | -0.16293  |           |           |          |              |  |
| Excited State 36: | Triplet-A | 5.2892 eV | 234.41 nm | f=n.d.   | <S**2>=2.000 |  |

|                   |           |           |           |          |              |
|-------------------|-----------|-----------|-----------|----------|--------------|
| 207 -> 264        | -0.10074  |           |           |          |              |
| 215 -> 231        | 0.14843   |           |           |          |              |
| 215 -> 232        | 0.15710   |           |           |          |              |
| 216 -> 232        | 0.11812   |           |           |          |              |
| 226 -> 264        | -0.18178  |           |           |          |              |
| 227 -> 264        | -0.20911  |           |           |          |              |
| 228 -> 264        | -0.15483  |           |           |          |              |
| Excited State 37: | Singlet-A | 5.4201 eV | 228.75 nm | f=0.0002 | <S**2>=0.000 |
| 219 -> 231        | -0.11140  |           |           |          |              |
| 220 -> 232        | 0.14601   |           |           |          |              |
| 222 -> 232        | 0.14939   |           |           |          |              |
| 222 -> 233        | 0.12120   |           |           |          |              |
| 223 -> 229        | 0.14878   |           |           |          |              |
| 223 -> 231        | 0.16103   |           |           |          |              |
| 223 -> 238        | -0.11274  |           |           |          |              |
| 224 -> 229        | -0.17843  |           |           |          |              |
| 224 -> 230        | 0.20050   |           |           |          |              |
| 224 -> 241        | 0.17696   |           |           |          |              |
| 225 -> 229        | 0.12960   |           |           |          |              |
| 228 -> 233        | 0.15506   |           |           |          |              |
| Excited State 38: | Singlet-A | 5.4489 eV | 227.54 nm | f=0.0008 | <S**2>=0.000 |
| 221 -> 229        | -0.11258  |           |           |          |              |
| 221 -> 230        | -0.10248  |           |           |          |              |
| 222 -> 229        | -0.10449  |           |           |          |              |
| 222 -> 232        | -0.10612  |           |           |          |              |
| 223 -> 229        | 0.18985   |           |           |          |              |
| 223 -> 232        | -0.12783  |           |           |          |              |
| 223 -> 241        | -0.10605  |           |           |          |              |
| 224 -> 230        | -0.14724  |           |           |          |              |
| 224 -> 231        | -0.16095  |           |           |          |              |
| 224 -> 238        | 0.11331   |           |           |          |              |
| 227 -> 233        | -0.13663  |           |           |          |              |
| 228 -> 235        | 0.11873   |           |           |          |              |
| Excited State 39: | Singlet-A | 5.4825 eV | 226.15 nm | f=0.0098 | <S**2>=0.000 |
| 218 -> 229        | 0.12448   |           |           |          |              |
| 221 -> 229        | 0.20008   |           |           |          |              |
| 221 -> 230        | 0.15420   |           |           |          |              |
| 221 -> 235        | 0.10972   |           |           |          |              |
| 222 -> 231        | -0.14144  |           |           |          |              |
| 223 -> 230        | -0.12845  |           |           |          |              |
| 223 -> 232        | -0.12426  |           |           |          |              |
| 224 -> 231        | -0.11174  |           |           |          |              |
| 224 -> 232        | -0.14109  |           |           |          |              |
| 224 -> 235        | 0.10643   |           |           |          |              |
| 226 -> 233        | -0.10383  |           |           |          |              |
| 227 -> 235        | 0.11768   |           |           |          |              |
| 228 -> 238        | 0.10246   |           |           |          |              |
| Excited State 40: | Singlet-A | 5.4945 eV | 225.65 nm | f=0.4595 | <S**2>=0.000 |
| 220 -> 230        | 0.10192   |           |           |          |              |
| 221 -> 229        | 0.14847   |           |           |          |              |
| 221 -> 230        | 0.12673   |           |           |          |              |
| 222 -> 230        | 0.15608   |           |           |          |              |
| 223 -> 231        | 0.19820   |           |           |          |              |
| 224 -> 232        | 0.20579   |           |           |          |              |
| 224 -> 233        | 0.13547   |           |           |          |              |
| 226 -> 235        | -0.13887  |           |           |          |              |
| 227 -> 238        | -0.13850  |           |           |          |              |
| 228 -> 241        | 0.13888   |           |           |          |              |
| Excited State 41: | Triplet-A | 5.6655 eV | 218.84 nm | f=n.d.   | <S**2>=2.000 |
| 223 -> 284        | -0.10677  |           |           |          |              |
| 225 -> 241        | -0.10051  |           |           |          |              |
| 228 -> 233        | -0.11066  |           |           |          |              |
| Excited State 42: | Triplet-A | 5.6673 eV | 218.77 nm | f=n.d.   | <S**2>=2.000 |
| 226 -> 241        | -0.10569  |           |           |          |              |
| 228 -> 241        | 0.10902   |           |           |          |              |

**Table S7** First TD- $\omega$ B97X/6-311++G(d,p) triplet and singlet electronic transitions computed for the tetramer comprising two  $\pi$ - $\pi$  stacked H-bonded dimers of TT-CCH (Figure 6e) at the optimized ground state geometry.

Excitation energies and oscillator strengths:

|               |    |           |           |           |        |              |
|---------------|----|-----------|-----------|-----------|--------|--------------|
| Excited State | 1: | Triplet-A | 3.2106 eV | 386.17 nm | f=n.d. | <S**2>=2.000 |
| 225 -> 230    |    | 0.36311   |           |           |        |              |
| 225 -> 231    |    | 0.13979   |           |           |        |              |
| 226 -> 229    |    | 0.41725   |           |           |        |              |
| 226 -> 232    |    | 0.11811   |           |           |        |              |
| 227 -> 230    |    | -0.20932  |           |           |        |              |
| Excited State | 2: | Triplet-A | 3.2109 eV | 386.13 nm | f=n.d. | <S**2>=2.000 |
| 225 -> 229    |    | 0.38190   |           |           |        |              |
| 226 -> 230    |    | 0.42059   |           |           |        |              |
| 226 -> 231    |    | 0.12541   |           |           |        |              |
| 227 -> 229    |    | -0.18177  |           |           |        |              |
| Excited State | 3: | Triplet-A | 3.2212 eV | 384.90 nm | f=n.d. | <S**2>=2.000 |
| 225 -> 232    |    | 0.16921   |           |           |        |              |
| 227 -> 229    |    | -0.13077  |           |           |        |              |
| 227 -> 232    |    | 0.36476   |           |           |        |              |
| 228 -> 230    |    | -0.13207  |           |           |        |              |
| 228 -> 231    |    | 0.41485   |           |           |        |              |
| Excited State | 4: | Triplet-A | 3.2234 eV | 384.63 nm | f=n.d. | <S**2>=2.000 |
| 225 -> 230    |    | -0.11685  |           |           |        |              |
| 225 -> 231    |    | 0.14557   |           |           |        |              |
| 227 -> 231    |    | 0.39339   |           |           |        |              |
| 228 -> 229    |    | -0.11875  |           |           |        |              |
| 228 -> 232    |    | 0.39535   |           |           |        |              |
| Excited State | 5: | Triplet-A | 3.9412 eV | 314.58 nm | f=n.d. | <S**2>=2.000 |
| 219 -> 232    |    | -0.14977  |           |           |        |              |
| 220 -> 231    |    | 0.13139   |           |           |        |              |
| 223 -> 234    |    | -0.19911  |           |           |        |              |
| 223 -> 239    |    | 0.24255   |           |           |        |              |
| 223 -> 240    |    | 0.21201   |           |           |        |              |
| 224 -> 233    |    | 0.22686   |           |           |        |              |
| 224 -> 238    |    | 0.28465   |           |           |        |              |
| Excited State | 6: | Triplet-A | 3.9432 eV | 314.43 nm | f=n.d. | <S**2>=2.000 |
| 219 -> 231    |    | -0.14012  |           |           |        |              |
| 220 -> 232    |    | 0.13336   |           |           |        |              |
| 223 -> 233    |    | 0.22850   |           |           |        |              |
| 223 -> 238    |    | 0.29984   |           |           |        |              |
| 224 -> 234    |    | -0.18581  |           |           |        |              |
| 224 -> 239    |    | 0.23161   |           |           |        |              |
| 224 -> 240    |    | 0.20447   |           |           |        |              |
| Excited State | 7: | Triplet-A | 3.9611 eV | 313.01 nm | f=n.d. | <S**2>=2.000 |
| 217 -> 229    |    | -0.11306  |           |           |        |              |
| 218 -> 229    |    | -0.10345  |           |           |        |              |
| 218 -> 230    |    | -0.11910  |           |           |        |              |
| 221 -> 233    |    | -0.18341  |           |           |        |              |
| 221 -> 234    |    | 0.25793   |           |           |        |              |
| 221 -> 238    |    | 0.13368   |           |           |        |              |
| 222 -> 233    |    | 0.20658   |           |           |        |              |
| 222 -> 234    |    | -0.21344  |           |           |        |              |
| 222 -> 238    |    | -0.14964  |           |           |        |              |
| Excited State | 8: | Triplet-A | 3.9611 eV | 313.01 nm | f=n.d. | <S**2>=2.000 |
| 217 -> 230    |    | 0.11460   |           |           |        |              |
| 218 -> 229    |    | 0.11828   |           |           |        |              |
| 218 -> 230    |    | -0.10484  |           |           |        |              |
| 221 -> 233    |    | 0.23577   |           |           |        |              |
| 221 -> 234    |    | 0.18152   |           |           |        |              |
| 221 -> 238    |    | -0.14625  |           |           |        |              |
| 222 -> 233    |    | 0.21770   |           |           |        |              |

|                   |           |           |           |        |              |
|-------------------|-----------|-----------|-----------|--------|--------------|
| 222 -> 234        | 0.22924   |           |           |        |              |
| 222 -> 238        | -0.13460  |           |           |        |              |
| 222 -> 240        | 0.10062   |           |           |        |              |
| Excited State 9:  | Triplet-A | 4.0987 eV | 302.49 nm | f=n.d. | <S**2>=2.000 |
| 217 -> 233        | -0.13089  |           |           |        |              |
| 219 -> 234        | 0.16068   |           |           |        |              |
| 219 -> 239        | -0.17676  |           |           |        |              |
| 219 -> 240        | -0.14956  |           |           |        |              |
| 220 -> 233        | 0.10526   |           |           |        |              |
| 220 -> 238        | 0.21890   |           |           |        |              |
| 223 -> 232        | 0.18625   |           |           |        |              |
| 224 -> 231        | 0.17504   |           |           |        |              |
| 224 -> 255        | -0.10792  |           |           |        |              |
| Excited State 10: | Triplet-A | 4.0989 eV | 302.48 nm | f=n.d. | <S**2>=2.000 |
| 217 -> 234        | 0.13106   |           |           |        |              |
| 219 -> 233        | -0.15379  |           |           |        |              |
| 219 -> 238        | -0.21790  |           |           |        |              |
| 220 -> 234        | -0.10122  |           |           |        |              |
| 220 -> 239        | 0.17466   |           |           |        |              |
| 220 -> 240        | 0.15161   |           |           |        |              |
| 223 -> 231        | 0.18182   |           |           |        |              |
| 223 -> 255        | -0.12634  |           |           |        |              |
| 224 -> 232        | 0.16221   |           |           |        |              |
| Excited State 11: | Triplet-A | 4.1131 eV | 301.44 nm | f=n.d. | <S**2>=2.000 |
| 217 -> 233        | -0.18470  |           |           |        |              |
| 217 -> 238        | 0.16768   |           |           |        |              |
| 218 -> 234        | 0.23409   |           |           |        |              |
| 218 -> 239        | 0.10036   |           |           |        |              |
| 218 -> 240        | 0.10093   |           |           |        |              |
| 220 -> 233        | -0.16375  |           |           |        |              |
| 221 -> 230        | -0.17679  |           |           |        |              |
| 221 -> 252        | -0.13766  |           |           |        |              |
| 222 -> 229        | 0.18537   |           |           |        |              |
| 222 -> 248        | 0.11462   |           |           |        |              |
| 226 -> 234        | 0.10184   |           |           |        |              |
| Excited State 12: | Triplet-A | 4.1131 eV | 301.44 nm | f=n.d. | <S**2>=2.000 |
| 217 -> 234        | -0.19224  |           |           |        |              |
| 217 -> 239        | -0.11350  |           |           |        |              |
| 217 -> 240        | -0.11032  |           |           |        |              |
| 218 -> 233        | 0.23005   |           |           |        |              |
| 218 -> 238        | -0.15150  |           |           |        |              |
| 220 -> 234        | -0.15538  |           |           |        |              |
| 221 -> 229        | 0.18356   |           |           |        |              |
| 221 -> 248        | 0.11731   |           |           |        |              |
| 222 -> 230        | -0.17821  |           |           |        |              |
| 222 -> 252        | -0.13609  |           |           |        |              |
| Excited State 13: | Triplet-A | 4.7658 eV | 260.15 nm | f=n.d. | <S**2>=2.000 |
| 211 -> 232        | 0.13299   |           |           |        |              |
| 212 -> 231        | 0.10109   |           |           |        |              |
| 223 -> 232        | 0.11373   |           |           |        |              |
| 224 -> 231        | 0.16428   |           |           |        |              |
| 227 -> 232        | -0.12044  |           |           |        |              |
| 227 -> 238        | 0.14549   |           |           |        |              |
| 227 -> 248        | -0.13507  |           |           |        |              |
| 228 -> 234        | -0.11558  |           |           |        |              |
| 228 -> 239        | 0.10447   |           |           |        |              |
| 228 -> 255        | 0.13772   |           |           |        |              |
| 228 -> 275        | 0.11029   |           |           |        |              |
| Excited State 14: | Triplet-A | 4.7673 eV | 260.07 nm | f=n.d. | <S**2>=2.000 |
| 211 -> 231        | 0.11452   |           |           |        |              |
| 212 -> 232        | 0.11221   |           |           |        |              |
| 224 -> 232        | 0.16408   |           |           |        |              |
| 227 -> 230        | 0.11332   |           |           |        |              |
| 227 -> 234        | -0.10478  |           |           |        |              |
| 227 -> 239        | 0.11715   |           |           |        |              |

|                   |           |           |           |          |              |
|-------------------|-----------|-----------|-----------|----------|--------------|
| 227 -> 255        | 0.12916   |           |           |          |              |
| 227 -> 275        | 0.10239   |           |           |          |              |
| 228 -> 238        | 0.13656   |           |           |          |              |
| 228 -> 248        | -0.13169  |           |           |          |              |
| Excited State 15: | Triplet-A | 4.7871 eV | 259.00 nm | f=n.d.   | <S**2>=2.000 |
| 208 -> 230        | 0.12273   |           |           |          |              |
| 221 -> 230        | 0.15226   |           |           |          |              |
| 222 -> 229        | -0.14391  |           |           |          |              |
| 225 -> 233        | -0.11632  |           |           |          |              |
| 225 -> 238        | 0.11066   |           |           |          |              |
| 225 -> 248        | 0.14015   |           |           |          |              |
| 226 -> 234        | 0.17143   |           |           |          |              |
| 226 -> 252        | 0.17585   |           |           |          |              |
| 226 -> 270        | 0.10334   |           |           |          |              |
| Excited State 16: | Triplet-A | 4.7884 eV | 258.93 nm | f=n.d.   | <S**2>=2.000 |
| 208 -> 229        | -0.11579  |           |           |          |              |
| 221 -> 229        | -0.14661  |           |           |          |              |
| 222 -> 230        | 0.13961   |           |           |          |              |
| 225 -> 230        | -0.10191  |           |           |          |              |
| 225 -> 234        | -0.13267  |           |           |          |              |
| 225 -> 252        | -0.14496  |           |           |          |              |
| 226 -> 233        | 0.11991   |           |           |          |              |
| 226 -> 238        | -0.13167  |           |           |          |              |
| 226 -> 248        | -0.14303  |           |           |          |              |
| 227 -> 234        | 0.11804   |           |           |          |              |
| Excited State 17: | Singlet-A | 4.9960 eV | 248.16 nm | f=0.0000 | <S**2>=0.000 |
| 225 -> 229        | -0.28782  |           |           |          |              |
| 226 -> 230        | -0.27601  |           |           |          |              |
| 227 -> 232        | 0.33822   |           |           |          |              |
| 228 -> 230        | -0.12844  |           |           |          |              |
| 228 -> 231        | 0.35201   |           |           |          |              |
| Excited State 18: | Triplet-A | 5.0347 eV | 246.26 nm | f=n.d.   | <S**2>=2.000 |
| 217 -> 234        | 0.14331   |           |           |          |              |
| 218 -> 229        | 0.12022   |           |           |          |              |
| 218 -> 233        | -0.12798  |           |           |          |              |
| 221 -> 229        | 0.26746   |           |           |          |              |
| 221 -> 272        | 0.10901   |           |           |          |              |
| 222 -> 230        | -0.25401  |           |           |          |              |
| 222 -> 270        | -0.12717  |           |           |          |              |
| Excited State 19: | Triplet-A | 5.0349 eV | 246.25 nm | f=n.d.   | <S**2>=2.000 |
| 217 -> 233        | 0.12435   |           |           |          |              |
| 218 -> 230        | -0.11999  |           |           |          |              |
| 218 -> 234        | -0.15757  |           |           |          |              |
| 218 -> 270        | -0.10846  |           |           |          |              |
| 221 -> 230        | -0.25600  |           |           |          |              |
| 221 -> 270        | -0.12933  |           |           |          |              |
| 222 -> 229        | 0.26526   |           |           |          |              |
| 222 -> 272        | 0.10652   |           |           |          |              |
| 226 -> 252        | 0.10696   |           |           |          |              |
| Excited State 20: | Singlet-A | 5.0368 eV | 246.16 nm | f=0.3358 | <S**2>=0.000 |
| 225 -> 230        | 0.39417   |           |           |          |              |
| 226 -> 229        | 0.43374   |           |           |          |              |
| 226 -> 232        | 0.12735   |           |           |          |              |
| 227 -> 230        | -0.18097  |           |           |          |              |
| 227 -> 231        | -0.11657  |           |           |          |              |
| Excited State 21: | Triplet-A | 5.0471 eV | 245.65 nm | f=n.d.   | <S**2>=2.000 |
| 219 -> 238        | 0.14012   |           |           |          |              |
| 220 -> 234        | 0.10011   |           |           |          |              |
| 223 -> 230        | -0.10127  |           |           |          |              |
| 223 -> 231        | 0.28064   |           |           |          |              |
| 224 -> 229        | -0.10231  |           |           |          |              |
| 224 -> 232        | 0.24939   |           |           |          |              |
| Excited State 22: | Triplet-A | 5.0493 eV | 245.55 nm | f=n.d.   | <S**2>=2.000 |

|                   |           |           |           |          |              |  |
|-------------------|-----------|-----------|-----------|----------|--------------|--|
| 219 -> 234        | -0.10302  |           |           |          |              |  |
| 220 -> 232        | 0.12159   |           |           |          |              |  |
| 220 -> 238        | -0.10802  |           |           |          |              |  |
| 223 -> 229        | -0.10735  |           |           |          |              |  |
| 223 -> 232        | 0.23825   |           |           |          |              |  |
| 224 -> 231        | 0.27778   |           |           |          |              |  |
| Excited State 23: | Triplet-A | 5.0633 eV | 244.87 nm | f=n.d.   | <S**2>=2.000 |  |
| 219 -> 229        | 0.10498   |           |           |          |              |  |
| 219 -> 232        | -0.15167  |           |           |          |              |  |
| 220 -> 231        | 0.17268   |           |           |          |              |  |
| 223 -> 255        | 0.11512   |           |           |          |              |  |
| 228 -> 233        | -0.14454  |           |           |          |              |  |
| 228 -> 238        | -0.19209  |           |           |          |              |  |
| Excited State 24: | Triplet-A | 5.0651 eV | 244.78 nm | f=n.d.   | <S**2>=2.000 |  |
| 219 -> 231        | -0.16410  |           |           |          |              |  |
| 219 -> 255        | 0.11298   |           |           |          |              |  |
| 220 -> 232        | 0.12430   |           |           |          |              |  |
| 220 -> 233        | 0.10654   |           |           |          |              |  |
| 220 -> 238        | 0.10014   |           |           |          |              |  |
| 223 -> 238        | -0.11490  |           |           |          |              |  |
| 227 -> 238        | -0.11187  |           |           |          |              |  |
| 228 -> 234        | 0.10786   |           |           |          |              |  |
| 228 -> 239        | -0.15406  |           |           |          |              |  |
| 228 -> 240        | -0.13716  |           |           |          |              |  |
| Excited State 25: | Singlet-A | 5.0729 eV | 244.41 nm | f=0.0000 | <S**2>=0.000 |  |
| 225 -> 229        | 0.26413   |           |           |          |              |  |
| 225 -> 232        | 0.18642   |           |           |          |              |  |
| 226 -> 230        | 0.33384   |           |           |          |              |  |
| 227 -> 229        | -0.24095  |           |           |          |              |  |
| 227 -> 232        | 0.17088   |           |           |          |              |  |
| 228 -> 230        | -0.11691  |           |           |          |              |  |
| 228 -> 231        | 0.24471   |           |           |          |              |  |
| Excited State 26: | Singlet-A | 5.0905 eV | 243.56 nm | f=0.8068 | <S**2>=0.000 |  |
| 225 -> 231        | 0.18304   |           |           |          |              |  |
| 227 -> 230        | -0.18112  |           |           |          |              |  |
| 227 -> 231        | 0.37785   |           |           |          |              |  |
| 228 -> 229        | -0.14406  |           |           |          |              |  |
| 228 -> 232        | 0.40807   |           |           |          |              |  |
| Excited State 27: | Triplet-A | 5.1120 eV | 242.53 nm | f=n.d.   | <S**2>=2.000 |  |
| 217 -> 229        | 0.16755   |           |           |          |              |  |
| 217 -> 233        | 0.10120   |           |           |          |              |  |
| 218 -> 230        | 0.18285   |           |           |          |              |  |
| 221 -> 252        | -0.11860  |           |           |          |              |  |
| 222 -> 233        | 0.10501   |           |           |          |              |  |
| 225 -> 233        | 0.16701   |           |           |          |              |  |
| 226 -> 234        | -0.18535  |           |           |          |              |  |
| Excited State 28: | Triplet-A | 5.1125 eV | 242.51 nm | f=n.d.   | <S**2>=2.000 |  |
| 217 -> 230        | 0.16868   |           |           |          |              |  |
| 218 -> 229        | 0.18624   |           |           |          |              |  |
| 218 -> 233        | 0.10420   |           |           |          |              |  |
| 221 -> 233        | -0.10421  |           |           |          |              |  |
| 222 -> 252        | 0.12172   |           |           |          |              |  |
| 225 -> 234        | -0.16501  |           |           |          |              |  |
| 226 -> 233        | 0.18656   |           |           |          |              |  |
| 226 -> 238        | -0.11429  |           |           |          |              |  |
| Excited State 29: | Triplet-A | 5.2117 eV | 237.90 nm | f=n.d.   | <S**2>=2.000 |  |
| 215 -> 261        | -0.11632  |           |           |          |              |  |
| 215 -> 265        | -0.23091  |           |           |          |              |  |
| 216 -> 259        | -0.14300  |           |           |          |              |  |
| 216 -> 260        | 0.11199   |           |           |          |              |  |
| 216 -> 264        | 0.18573   |           |           |          |              |  |
| Excited State 30: | Triplet-A | 5.2133 eV | 237.82 nm | f=n.d.   | <S**2>=2.000 |  |
| 215 -> 259        | -0.14214  |           |           |          |              |  |

|                   |           |           |           |          |              |
|-------------------|-----------|-----------|-----------|----------|--------------|
| 215 -> 260        | 0.11273   |           |           |          |              |
| 215 -> 264        | 0.18735   |           |           |          |              |
| 216 -> 261        | -0.11441  |           |           |          |              |
| 216 -> 265        | -0.23065  |           |           |          |              |
| Excited State 31: | Triplet-A | 5.2532 eV | 236.02 nm | f=n.d.   | <S**2>=2.000 |
| 213 -> 231        | -0.12563  |           |           |          |              |
| 214 -> 229        | 0.10843   |           |           |          |              |
| 215 -> 230        | -0.12731  |           |           |          |              |
| 215 -> 231        | 0.13242   |           |           |          |              |
| 216 -> 232        | 0.17130   |           |           |          |              |
| 227 -> 261        | -0.11019  |           |           |          |              |
| 227 -> 265        | -0.20347  |           |           |          |              |
| 228 -> 259        | -0.12611  |           |           |          |              |
| 228 -> 264        | 0.13687   |           |           |          |              |
| 228 -> 271        | -0.10320  |           |           |          |              |
| Excited State 32: | Triplet-A | 5.2567 eV | 235.86 nm | f=n.d.   | <S**2>=2.000 |
| 213 -> 229        | 0.10388   |           |           |          |              |
| 214 -> 231        | -0.12025  |           |           |          |              |
| 215 -> 232        | 0.17087   |           |           |          |              |
| 216 -> 230        | -0.12303  |           |           |          |              |
| 216 -> 231        | 0.14223   |           |           |          |              |
| 226 -> 265        | -0.10390  |           |           |          |              |
| 227 -> 259        | -0.14005  |           |           |          |              |
| 227 -> 260        | 0.10546   |           |           |          |              |
| 227 -> 264        | 0.16402   |           |           |          |              |
| 228 -> 265        | -0.18204  |           |           |          |              |
| 228 -> 273        | 0.10103   |           |           |          |              |
| Excited State 33: | Triplet-A | 5.2874 eV | 234.49 nm | f=n.d.   | <S**2>=2.000 |
| 213 -> 259        | 0.11242   |           |           |          |              |
| 213 -> 260        | -0.10109  |           |           |          |              |
| 213 -> 264        | -0.16427  |           |           |          |              |
| 214 -> 265        | 0.19958   |           |           |          |              |
| 215 -> 271        | -0.10069  |           |           |          |              |
| 215 -> 282        | 0.12041   |           |           |          |              |
| 216 -> 273        | 0.12017   |           |           |          |              |
| Excited State 34: | Triplet-A | 5.2884 eV | 234.44 nm | f=n.d.   | <S**2>=2.000 |
| 213 -> 265        | 0.19439   |           |           |          |              |
| 214 -> 259        | 0.11666   |           |           |          |              |
| 214 -> 264        | -0.16624  |           |           |          |              |
| 215 -> 273        | 0.12067   |           |           |          |              |
| 216 -> 282        | 0.12026   |           |           |          |              |
| Excited State 35: | Triplet-A | 5.2948 eV | 234.16 nm | f=n.d.   | <S**2>=2.000 |
| 213 -> 229        | 0.13818   |           |           |          |              |
| 214 -> 230        | -0.17369  |           |           |          |              |
| 215 -> 229        | 0.17331   |           |           |          |              |
| 216 -> 230        | -0.11788  |           |           |          |              |
| 216 -> 231        | -0.13200  |           |           |          |              |
| 225 -> 259        | 0.11260   |           |           |          |              |
| 225 -> 260        | -0.10374  |           |           |          |              |
| 225 -> 264        | -0.17103  |           |           |          |              |
| 226 -> 265        | -0.17602  |           |           |          |              |
| Excited State 36: | Triplet-A | 5.2973 eV | 234.05 nm | f=n.d.   | <S**2>=2.000 |
| 213 -> 230        | -0.16826  |           |           |          |              |
| 214 -> 229        | 0.14264   |           |           |          |              |
| 215 -> 230        | -0.12215  |           |           |          |              |
| 215 -> 231        | -0.13475  |           |           |          |              |
| 216 -> 229        | 0.16566   |           |           |          |              |
| 225 -> 265        | 0.19498   |           |           |          |              |
| 226 -> 264        | 0.15739   |           |           |          |              |
| Excited State 37: | Singlet-A | 5.4420 eV | 227.83 nm | f=0.0000 | <S**2>=0.000 |
| 219 -> 231        | -0.13321  |           |           |          |              |
| 220 -> 232        | 0.14424   |           |           |          |              |
| 223 -> 229        | -0.11310  |           |           |          |              |
| 223 -> 232        | 0.17953   |           |           |          |              |



|                   |           |           |           |          |              |
|-------------------|-----------|-----------|-----------|----------|--------------|
| 223 -> 233        | 0.19390   |           |           |          |              |
| 223 -> 238        | 0.17508   |           |           |          |              |
| 224 -> 231        | 0.27149   |           |           |          |              |
| 224 -> 239        | 0.11936   |           |           |          |              |
| 224 -> 240        | 0.11477   |           |           |          |              |
| 225 -> 238        | 0.10060   |           |           |          |              |
| 228 -> 231        | 0.12530   |           |           |          |              |
| 228 -> 234        | -0.11822  |           |           |          |              |
| 228 -> 239        | 0.14137   |           |           |          |              |
| 228 -> 240        | 0.12336   |           |           |          |              |
|                   |           |           |           |          |              |
| Excited State 38: | Singlet-A | 5.4635 eV | 226.93 nm | f=0.1241 | <S**2>=0.000 |
| 219 -> 232        | -0.11951  |           |           |          |              |
| 220 -> 231        | 0.15112   |           |           |          |              |
| 221 -> 229        | 0.11835   |           |           |          |              |
| 222 -> 230        | -0.12440  |           |           |          |              |
| 223 -> 231        | 0.24205   |           |           |          |              |
| 223 -> 239        | 0.14449   |           |           |          |              |
| 223 -> 240        | 0.13732   |           |           |          |              |
| 224 -> 229        | -0.12252  |           |           |          |              |
| 224 -> 232        | 0.18786   |           |           |          |              |
| 224 -> 233        | 0.14365   |           |           |          |              |
| 224 -> 238        | 0.11937   |           |           |          |              |
| 228 -> 233        | 0.16185   |           |           |          |              |
| 228 -> 238        | 0.17940   |           |           |          |              |
|                   |           |           |           |          |              |
| Excited State 39: | Singlet-A | 5.4830 eV | 226.12 nm | f=0.4785 | <S**2>=0.000 |
| 217 -> 230        | 0.11624   |           |           |          |              |
| 218 -> 229        | 0.15683   |           |           |          |              |
| 220 -> 230        | 0.12842   |           |           |          |              |
| 221 -> 229        | 0.23149   |           |           |          |              |
| 221 -> 233        | 0.18125   |           |           |          |              |
| 222 -> 230        | -0.21338  |           |           |          |              |
| 222 -> 231        | -0.12825  |           |           |          |              |
| 222 -> 234        | 0.14350   |           |           |          |              |
| 225 -> 234        | 0.16600   |           |           |          |              |
| 226 -> 233        | -0.15939  |           |           |          |              |
| 226 -> 238        | 0.10195   |           |           |          |              |
| 228 -> 238        | -0.10121  |           |           |          |              |
|                   |           |           |           |          |              |
| Excited State 40: | Singlet-A | 5.4897 eV | 225.85 nm | f=0.0000 | <S**2>=0.000 |
| 217 -> 229        | 0.12428   |           |           |          |              |
| 218 -> 230        | 0.16332   |           |           |          |              |
| 220 -> 229        | 0.13252   |           |           |          |              |
| 221 -> 230        | 0.23644   |           |           |          |              |
| 221 -> 231        | 0.11909   |           |           |          |              |
| 221 -> 234        | -0.13232  |           |           |          |              |
| 222 -> 229        | -0.23552  |           |           |          |              |
| 222 -> 233        | -0.18836  |           |           |          |              |
| 224 -> 231        | -0.10943  |           |           |          |              |
| 225 -> 233        | -0.15157  |           |           |          |              |
| 226 -> 234        | 0.16783   |           |           |          |              |
|                   |           |           |           |          |              |
| Excited State 41: | Triplet-A | 5.6259 eV | 220.38 nm | f=n.d.   | <S**2>=2.000 |
| 215 -> 265        | -0.10770  |           |           |          |              |
| 225 -> 234        | -0.10820  |           |           |          |              |
| 227 -> 239        | 0.12309   |           |           |          |              |
| 227 -> 240        | 0.10650   |           |           |          |              |
| 228 -> 233        | 0.12496   |           |           |          |              |
| 228 -> 238        | 0.14692   |           |           |          |              |
|                   |           |           |           |          |              |
| Excited State 42: | Triplet-A | 5.6301 eV | 220.22 nm | f=n.d.   | <S**2>=2.000 |
| 216 -> 265        | 0.10877   |           |           |          |              |
| 225 -> 238        | -0.11420  |           |           |          |              |
| 227 -> 233        | -0.14123  |           |           |          |              |
| 227 -> 238        | -0.10091  |           |           |          |              |
| 228 -> 239        | -0.11600  |           |           |          |              |
| 228 -> 240        | -0.10021  |           |           |          |              |
