# Supplementary material for: 3-Ethynyltriimidazo[1,2-a:1′,2′-c:1″,2″-e][1,3,5]triazine Dual Short- and Long-Lived Emissions with Crystallization-Enhanced Feature: Role of Hydrogen Bonds and π-π Interactions
Source: Molecules. 2024 Apr 25;29(9):1967. doi: 10.3390/molecules29091967 (PMC11085060; doi:10.3390/molecules29091967)
Supplement: Supplementary file 1 [file molecules-29-01967-s001.zip › TT-CCH.cif]

data_global
_audit_creation_date          'Mon Sep 18 10:00:08 2023'
_audit_creation_method
;manual editing of form.cif from SHELXL-2018/3 (Sheldrick, 2015)
;
_publ_contact_author_name    'Dr. Alessandra Forni'
_publ_contact_author_address
;    CNR - Istituto di Scienze e Tecnologie Chimiche 'G. Natta'
     Via Golgi 19
     I-20133 Milano
     Italy
;

_publ_contact_author_email          'alessandra.forni@scitec.cnr.it'
_publ_contact_author_fax            '39(2)50314300'
_publ_contact_author_phone          '39(2)50314273'

_publ_requested_journal             'Molecules'

# AUTHOR LIST

loop_
_publ_author_name
_publ_author_address
;      Daniele Malpicci, Daniele Maver, Alessia Colombo,
       Elena Cariati
;
;      Department of Chemistry, Universita' degli Studi di Milano
       via Golgi, 19
       I-20133 Milano
       Italy
;
       'Alessandra Forni, Elena Lucenti, Daniele Marinotto'
;      CNR - Istituto di Scienze e Tecnologie Chimiche
       Via Golgi 19
       I-20133 Milano
       Italy
;
       'Chiara Botta'
;      CNR - Istituto di Scienze e Tecnologie Chimiche
       Via Corti 12
       I-20133 Milano
       Italy
;

# TITLE
_publ_section_title
;
3-ethynyltriimidazo[1,2-a:1',2'-c:1'',2''-e][1,3,5]triazine 
dual short- and long-lived emissions with crystallization-enhanced
 feature: Role of hydrogen bonds and pi-pi interactions
;
 
data_TT-CCH
#data_eca65 
 
_audit_creation_method            'SHELXL-2018/3'
_shelx_SHELXL_version_number      '2018/3'
_chemical_name_systematic         
;
3-ethynyltriimidazo[1,2-a:1',2'-c:1'',2''-e][1,3,5]triazine
;
_chemical_formula_moiety          'C11 H6 N6'
_chemical_formula_sum             'C11 H6 N6' 
_chemical_formula_weight          222.22

loop_
 _atom_type_symbol
 _atom_type_description
 _atom_type_scat_dispersion_real
 _atom_type_scat_dispersion_imag
 _atom_type_scat_source
 'C'  'C'   0.0181   0.0091
 'International Tables Vol C Tables 4.2.6.8 and 6.1.1.4'
 'H'  'H'   0.0000   0.0000
 'International Tables Vol C Tables 4.2.6.8 and 6.1.1.4'
 'N'  'N'   0.0311   0.0180
 'International Tables Vol C Tables 4.2.6.8 and 6.1.1.4'
 
_space_group_crystal_system       monoclinic
_space_group_IT_number            14
_space_group_name_H-M_alt         'P 21/c'
_space_group_name_Hall            '-P 2ybc'
 
_shelx_space_group_comment
;
The symmetry employed for this shelxl refinement is uniquely defined
by the following loop, which should always be used as a source of
symmetry information in preference to the above space-group names.
They are only intended as comments.
;
 
loop_
 _space_group_symop_operation_xyz
 'x, y, z'
 '-x, y+1/2, -z+1/2'
 '-x, -y, -z'
 'x, -y-1/2, z-1/2'
 
_cell_length_a                    13.35072(15)
_cell_length_b                    4.63511(4)
_cell_length_c                    16.41198(19)
_cell_angle_alpha                 90
_cell_angle_beta                  96.7803(11)
_cell_angle_gamma                 90
_cell_volume                      1008.504(19)
_cell_formula_units_Z             4
_cell_measurement_temperature     296(2)
_cell_measurement_reflns_used     12736
_cell_measurement_theta_min       3.3350
_cell_measurement_theta_max       79.8880
 
_exptl_crystal_recrystallization_method 
'Re-crystallisation from solvent: dichloromethane/hexane'
_exptl_crystal_description        prism
_exptl_crystal_colour             colourless
_exptl_crystal_density_method     none
_exptl_crystal_density_diffrn     1.464          
_exptl_crystal_F_000              456
_exptl_crystal_size_max           0.320
_exptl_crystal_size_mid           0.170
_exptl_crystal_size_min           0.100
_exptl_absorpt_coefficient_mu     0.805
_shelx_estimated_absorpt_T_min    0.783
_shelx_estimated_absorpt_T_max    0.924
_exptl_absorpt_correction_type    multi-scan
_exptl_absorpt_correction_T_min   0.59463
_exptl_absorpt_correction_T_max   1.00000
_exptl_absorpt_process_details
;
CrysAlisPro 1.171.42.93a (Rigaku Oxford Diffraction, 2023)
Empirical absorption correction using spherical harmonics,
implemented in SCALE3 ABSPACK scaling algorithm.
;
_diffrn_ambient_temperature       296(2)
_diffrn_radiation_wavelength      1.54184
_diffrn_radiation_type            CuK\a
_diffrn_source 'micro-focus sealed X-ray tube'
_diffrn_source_type 'PhotonJet (Cu) X-ray Source'
_diffrn_radiation_probe x-ray
_diffrn_radiation_monochromator mirror
_diffrn_measurement_device 'four-circle diffractometer'
_diffrn_measurement_device_type 'XtaLAB Synergy, Dualflex, HyPix'
_diffrn_measurement_method '\w scans'
_diffrn_detector 'Hybrid Pixel Array Detector'
_diffrn_detector_type HyPix
_diffrn_detector_area_resol_mean 10.0000
_diffrn_reflns_number             20327
_diffrn_reflns_av_unetI/netI      0.0257
_diffrn_reflns_av_R_equivalents   0.0445
_diffrn_reflns_limit_h_min        -17
_diffrn_reflns_limit_h_max        17
_diffrn_reflns_limit_k_min        -5
_diffrn_reflns_limit_k_max        5
_diffrn_reflns_limit_l_min        -20
_diffrn_reflns_limit_l_max        20
_diffrn_reflns_theta_min          3.334
_diffrn_reflns_theta_max          80.142
_diffrn_reflns_theta_full         67.684
_diffrn_measured_fraction_theta_max   0.992
_diffrn_measured_fraction_theta_full  1.000
_diffrn_reflns_Laue_measured_fraction_max    0.992
_diffrn_reflns_Laue_measured_fraction_full   1.000
_diffrn_reflns_point_group_measured_fraction_max   0.992
_diffrn_reflns_point_group_measured_fraction_full  1.000
_reflns_number_total              2177
_reflns_number_gt                 2010
_reflns_threshold_expression      'I > 2\s(I)'
_reflns_Friedel_coverage          0.000
_reflns_Friedel_fraction_max      .
_reflns_Friedel_fraction_full     .
 
_reflns_special_details
;
 Reflections were merged by SHELXL according to the crystal
 class for the calculation of statistics and refinement.
 
 _reflns_Friedel_fraction is defined as the number of unique
 Friedel pairs measured divided by the number that would be
 possible theoretically, ignoring centric projections and
 systematic absences.
;
 
_computing_data_collection     'CrysAlisPro 1.171.42.93a (Rigaku OD, 2023)'
_computing_cell_refinement     'CrysAlisPro 1.171.42.93a (Rigaku OD, 2023)'
_computing_data_reduction      'CrysAlisPro 1.171.42.93a (Rigaku OD, 2023)'
_computing_structure_solution   'SHELXT 2018/2 (Sheldrick, 2018)'
_computing_structure_refinement 'SHELXL-2018/3 (Sheldrick, 2018)'
_computing_molecular_graphics     'ORTEP III ( Burnett&Johnson, 1996)'
_computing_publication_material   'SHELXL-2018/3,PARST (Nardelli, 1995)'
_refine_ls_structure_factor_coef  Fsqd
_refine_ls_matrix_type            full
_refine_ls_weighting_scheme       calc
_refine_ls_weighting_details
'w=1/[\s^2^(Fo^2^)+(0.0686P)^2^+0.1583P] where P=(Fo^2^+2Fc^2^)/3'
_atom_sites_solution_primary      direct
_atom_sites_solution_secondary    difmap
_atom_sites_solution_hydrogens    geom
_refine_ls_hydrogen_treatment     constr
_refine_ls_extinction_method      none
_refine_ls_extinction_coef        .
_refine_ls_number_reflns          2177
_refine_ls_number_parameters      154
_refine_ls_number_restraints      0
_refine_ls_R_factor_all           0.0440
_refine_ls_R_factor_gt            0.0420
_refine_ls_wR_factor_ref          0.1164
_refine_ls_wR_factor_gt           0.1139
_refine_ls_goodness_of_fit_ref    1.050
_refine_ls_restrained_S_all       1.050
_refine_ls_shift/su_max           0.000
_refine_ls_shift/su_mean          0.000
 
loop_
 _atom_site_label
 _atom_site_type_symbol
 _atom_site_fract_x
 _atom_site_fract_y
 _atom_site_fract_z
 _atom_site_U_iso_or_equiv
 _atom_site_adp_type
 _atom_site_occupancy
 _atom_site_site_symmetry_order  
 _atom_site_calc_flag
 _atom_site_refinement_flags_posn
 _atom_site_refinement_flags_adp
 _atom_site_refinement_flags_occupancy
 _atom_site_disorder_assembly
 _atom_site_disorder_group
N1 N 0.63702(8) 0.3365(3) 0.53236(7) 0.0525(3) Uani 1 1 d . . . . .
N2 N 0.75925(7) 0.4660(2) 0.45725(6) 0.0410(2) Uani 1 1 d . . . . .
N3 N 0.88347(8) 0.6202(3) 0.36948(7) 0.0509(3) Uani 1 1 d . . . . .
N4 N 0.77328(8) 0.2765(2) 0.32614(6) 0.0443(3) Uani 1 1 d . . . . .
N5 N 0.65253(8) -0.0944(2) 0.27838(7) 0.0513(3) Uani 1 1 d . . . . .
N6 N 0.64552(7) 0.1114(2) 0.40068(6) 0.0445(3) Uani 1 1 d . . . . .
C1 C 0.69744(10) 0.5444(3) 0.57282(7) 0.0525(3) Uani 1 1 d . . . . .
H1 H 0.687469 0.618723 0.623879 0.063 Uiso 1 1 calc R U . . .
C2 C 0.77374(9) 0.6296(3) 0.52958(7) 0.0453(3) Uani 1 1 d . . . . .
C3 C 0.80887(9) 0.4631(2) 0.38752(7) 0.0408(3) Uani 1 1 d . . . . .
C4 C 0.89724(11) 0.5308(3) 0.29074(9) 0.0592(4) Uani 1 1 d . . . . .
H4 H 0.946176 0.605778 0.260803 0.071 Uiso 1 1 calc R U . . .
C5 C 0.83165(11) 0.3235(3) 0.26291(8) 0.0559(4) Uani 1 1 d . . . . .
H5 H 0.826507 0.231510 0.212233 0.067 Uiso 1 1 calc R U . . .
C6 C 0.69223(9) 0.0948(3) 0.33116(7) 0.0430(3) Uani 1 1 d . . . . .
C7 C 0.57409(10) -0.2083(3) 0.31663(9) 0.0536(3) Uani 1 1 d . . . . .
H7 H 0.530881 -0.351696 0.293712 0.064 Uiso 1 1 calc R U . . .
C8 C 0.56733(9) -0.0889(3) 0.39037(8) 0.0517(3) Uani 1 1 d . . . . .
H8 H 0.520703 -0.130789 0.426546 0.062 Uiso 1 1 calc R U . . .
C9 C 0.67660(9) 0.2973(3) 0.46468(7) 0.0432(3) Uani 1 1 d . . . . .
C10 C 0.85357(10) 0.8272(3) 0.54796(8) 0.0510(3) Uani 1 1 d . . . . .
C11 C 0.92062(12) 0.9914(4) 0.56573(9) 0.0643(4) Uani 1 1 d . . . . .
H11 H 0.973251 1.120266 0.579677 0.077 Uiso 1 1 calc R U . . .
 
loop_
 _atom_site_aniso_label
 _atom_site_aniso_U_11
 _atom_site_aniso_U_22
 _atom_site_aniso_U_33
 _atom_site_aniso_U_23
 _atom_site_aniso_U_13
 _atom_site_aniso_U_12
N1 0.0546(6) 0.0611(7) 0.0447(5) 0.0041(5) 0.0180(5) -0.0062(5)
N2 0.0414(5) 0.0454(5) 0.0372(5) 0.0016(4) 0.0089(4) -0.0033(4)
N3 0.0473(6) 0.0566(6) 0.0514(6) -0.0034(5) 0.0168(4) -0.0116(5)
N4 0.0461(5) 0.0480(5) 0.0407(5) -0.0023(4) 0.0127(4) -0.0061(4)
N5 0.0521(6) 0.0533(6) 0.0480(6) -0.0019(5) 0.0035(5) -0.0071(5)
N6 0.0435(5) 0.0475(6) 0.0434(5) 0.0038(4) 0.0086(4) -0.0075(4)
C1 0.0588(7) 0.0616(8) 0.0393(6) 0.0009(5) 0.0148(5) -0.0007(6)
C2 0.0502(6) 0.0484(6) 0.0378(6) -0.0004(5) 0.0068(5) 0.0001(5)
C3 0.0406(5) 0.0434(6) 0.0394(6) 0.0007(4) 0.0089(4) -0.0021(4)
C4 0.0575(8) 0.0697(9) 0.0554(8) -0.0056(6) 0.0276(6) -0.0150(6)
C5 0.0589(8) 0.0656(8) 0.0474(7) -0.0078(6) 0.0238(6) -0.0099(6)
C6 0.0427(6) 0.0446(6) 0.0422(6) 0.0022(5) 0.0063(5) -0.0027(5)
C7 0.0500(7) 0.0527(7) 0.0561(7) 0.0041(6) -0.0020(6) -0.0117(5)
C8 0.0447(6) 0.0561(7) 0.0545(7) 0.0097(6) 0.0059(5) -0.0114(5)
C9 0.0437(6) 0.0461(6) 0.0410(6) 0.0059(5) 0.0102(4) -0.0040(5)
C10 0.0534(7) 0.0574(7) 0.0430(6) -0.0043(5) 0.0089(5) -0.0011(6)
C11 0.0621(8) 0.0753(10) 0.0570(8) -0.0176(7) 0.0134(6) -0.0162(7)
 
_geom_special_details
;
 All esds (except the esd in the dihedral angle between two l.s. planes)
 are estimated using the full covariance matrix.  The cell esds are taken
 into account individually in the estimation of esds in distances, angles
 and torsion angles; correlations between esds in cell parameters are only
 used when they are defined by crystal symmetry.  An approximate (isotropic)
 treatment of cell esds is used for estimating esds involving l.s. planes.
;
 
loop_
 _geom_bond_atom_site_label_1
 _geom_bond_atom_site_label_2
 _geom_bond_distance
 _geom_bond_site_symmetry_2
 _geom_bond_publ_flag
N1 C9 1.2979(16) . ?
N1 C1 1.3761(18) . ?
N2 C9 1.3697(15) . ?
N2 C3 1.3885(15) . ?
N2 C2 1.4026(15) . ?
N3 C3 1.2959(15) . ?
N3 C4 1.3898(17) . ?
N4 C3 1.3694(15) . ?
N4 C6 1.3814(15) . ?
N4 C5 1.3865(15) . ?
N5 C6 1.3006(16) . ?
N5 C7 1.3874(18) . ?
N6 C6 1.3654(15) . ?
N6 C9 1.3838(16) . ?
N6 C8 1.3923(15) . ?
C1 C2 1.3666(18) . ?
C2 C10 1.4108(18) . ?
C4 C5 1.343(2) . ?
C7 C8 1.343(2) . ?
C10 C11 1.185(2) . ?
 
loop_
 _geom_angle_atom_site_label_1
 _geom_angle_atom_site_label_2
 _geom_angle_atom_site_label_3
 _geom_angle
 _geom_angle_site_symmetry_1
 _geom_angle_site_symmetry_3
 _geom_angle_publ_flag
C9 N1 C1 103.68(10) . . ?
C9 N2 C3 122.39(10) . . ?
C9 N2 C2 105.39(10) . . ?
C3 N2 C2 132.17(10) . . ?
C3 N3 C4 103.56(11) . . ?
C3 N4 C6 123.18(10) . . ?
C3 N4 C5 105.93(10) . . ?
C6 N4 C5 130.84(11) . . ?
C6 N5 C7 103.02(11) . . ?
C6 N6 C9 122.93(10) . . ?
C6 N6 C8 105.71(10) . . ?
C9 N6 C8 131.35(11) . . ?
C2 C1 N1 112.46(11) . . ?
C1 C2 N2 104.28(11) . . ?
C1 C2 C10 131.84(12) . . ?
N2 C2 C10 123.87(11) . . ?
N3 C3 N4 113.33(10) . . ?
N3 C3 N2 129.58(11) . . ?
N4 C3 N2 117.04(10) . . ?
C5 C4 N3 112.15(11) . . ?
C4 C5 N4 105.03(11) . . ?
N5 C6 N6 113.83(11) . . ?
N5 C6 N4 129.18(11) . . ?
N6 C6 N4 116.99(10) . . ?
C8 C7 N5 112.67(12) . . ?
C7 C8 N6 104.77(11) . . ?
N1 C9 N2 114.19(11) . . ?
N1 C9 N6 128.40(11) . . ?
N2 C9 N6 117.42(10) . . ?
C11 C10 C2 178.11(15) . . ?
 
_refine_diff_density_max    0.162
_refine_diff_density_min   -0.235
_refine_diff_density_rms    0.047

_shelx_res_file
;
TITL eca65_auto_a.res in P2(1)/c
    shelx.res
    created by SHELXL-2018/3 at 12:44:42 on 18-Sep-2023
REM Old TITL ECA65_auto in P2(1)/c
REM SHELXT solution in P2(1)/c: R1 0.145, Rweak 0.085, Alpha 0.019
REM <I/s> 0.606 for 248 systematic absences, Orientation as input
REM Formula found by SHELXT: C12 C17
REM CELL 1.54184 13.3496 4.6353 16.4116 90 96.781 90
REM ZERR 4 0.0002 0.0001 0.0002 0 0.001 0
CELL 1.54184 13.35072 4.63511 16.41198 90 96.7803 90
ZERR 4 0.00015 0.00004 0.00019 0 0.0011 0
LATT 1
SYMM -X,0.5+Y,0.5-Z
SFAC C H N
UNIT 44 24 24
ACTA
L.S. 8
PLAN  20
TEMP 23
SIZE 0.32 0.17 0.10
fmap 2
REM <olex2.extras>
REM <HklSrc "%.\\ECA65_auto.hkl">
REM </olex2.extras>
WGHT    0.068600    0.158300
FVAR       0.65774
N1    3    0.637024    0.336544    0.532361    11.00000    0.05461    0.06113 =
         0.04468    0.00408    0.01798   -0.00624
N2    3    0.759255    0.465973    0.457252    11.00000    0.04138    0.04544 =
         0.03718    0.00161    0.00887   -0.00327
N3    3    0.883470    0.620195    0.369483    11.00000    0.04728    0.05659 =
         0.05142   -0.00339    0.01679   -0.01163
N4    3    0.773283    0.276529    0.326135    11.00000    0.04607    0.04797 =
         0.04067   -0.00230    0.01266   -0.00615
N5    3    0.652530   -0.094352    0.278383    11.00000    0.05209    0.05330 =
         0.04802   -0.00190    0.00354   -0.00713
N6    3    0.645525    0.111355    0.400682    11.00000    0.04353    0.04745 =
         0.04339    0.00379    0.00858   -0.00747
C1    1    0.697444    0.544449    0.572817    11.00000    0.05879    0.06157 =
         0.03934    0.00089    0.01477   -0.00066
AFIX  43
H1    2    0.687469    0.618723    0.623879    11.00000   -1.20000
AFIX   0
C2    1    0.773738    0.629577    0.529576    11.00000    0.05016    0.04838 =
         0.03781   -0.00045    0.00682    0.00010
C3    1    0.808871    0.463091    0.387516    11.00000    0.04055    0.04344 =
         0.03944    0.00074    0.00889   -0.00213
C4    1    0.897238    0.530795    0.290742    11.00000    0.05751    0.06972 =
         0.05538   -0.00556    0.02764   -0.01497
AFIX  43
H4    2    0.946176    0.605778    0.260803    11.00000   -1.20000
AFIX   0
C5    1    0.831652    0.323528    0.262911    11.00000    0.05887    0.06560 =
         0.04738   -0.00784    0.02383   -0.00992
AFIX  43
H5    2    0.826507    0.231510    0.212233    11.00000   -1.20000
AFIX   0
C6    1    0.692230    0.094818    0.331162    11.00000    0.04267    0.04456 =
         0.04222    0.00217    0.00632   -0.00269
C7    1    0.574087   -0.208277    0.316631    11.00000    0.04997    0.05274 =
         0.05612    0.00409   -0.00197   -0.01166
AFIX  43
H7    2    0.530881   -0.351696    0.293712    11.00000   -1.20000
AFIX   0
C8    1    0.567327   -0.088905    0.390370    11.00000    0.04466    0.05608 =
         0.05450    0.00966    0.00588   -0.01138
AFIX  43
H8    2    0.520703   -0.130789    0.426546    11.00000   -1.20000
AFIX   0
C9    1    0.676596    0.297255    0.464681    11.00000    0.04371    0.04615 =
         0.04103    0.00590    0.01019   -0.00400
C10   1    0.853566    0.827227    0.547963    11.00000    0.05343    0.05743 =
         0.04297   -0.00427    0.00888   -0.00111
C11   1    0.920620    0.991403    0.565731    11.00000    0.06212    0.07529 =
         0.05700   -0.01755    0.01343   -0.01616
AFIX 163
H11   2    0.973251    1.120266    0.579677    11.00000   -1.20000
AFIX   0
HKLF 4


REM  eca65_auto_a.res in P2(1)/c
REM wR2 = 0.1164, GooF = S = 1.050, Restrained GooF = 1.050 for all data
REM R1 = 0.0420 for 2010 Fo > 4sig(Fo) and 0.0440 for all 2177 data
REM 154 parameters refined using 0 restraints

END

WGHT      0.0686      0.1583

REM Highest difference peak  0.162,  deepest hole -0.235,  1-sigma level  0.047
Q1    1   0.8876  0.8274  0.3794  11.00000  0.05    0.16
Q2    1   0.9175  0.7940  0.5621  11.00000  0.05    0.16
Q3    1   1.0035  1.0163  0.5958  11.00000  0.05    0.12
Q4    1   0.7803  0.2495  0.1965  11.00000  0.05    0.10
Q5    1   0.8321  0.5152  0.2617  11.00000  0.05    0.10
Q6    1   0.5411 -0.0517  0.4539  11.00000  0.05    0.10
Q7    1   0.8283  0.6742  0.5430  11.00000  0.05    0.10
Q8    1   0.8465  1.0442  0.5456  11.00000  0.05    0.10
Q9    1   0.6348 -0.5360  0.2404  11.00000  0.05    0.09
Q10   1   0.5376 -0.4155  0.2615  11.00000  0.05    0.09
Q11   1   0.8245  0.1133  0.2226  11.00000  0.05    0.09
Q12   1   0.9644  1.4097  0.5444  11.00000  0.05    0.09
Q13   1   0.6217  1.0436  0.6811  11.00000  0.05    0.09
Q14   1   0.9363  1.4281  0.5739  11.00000  0.05    0.08
Q15   1   0.9563  0.6244  0.5404  11.00000  0.05    0.08
Q16   1   0.5660 -0.4524  0.3032  11.00000  0.05    0.08
Q17   1   0.6252  0.5584  0.5350  11.00000  0.05    0.08
Q18   1   0.9438  0.5689  0.5827  11.00000  0.05    0.08
Q19   1   0.7479  0.6653  0.4592  11.00000  0.05    0.08
Q20   1   0.8833  0.3615  0.2812  11.00000  0.05    0.08
;
_shelx_res_checksum   47573

_shelx_hkl_file
;
   0   0  -1    0.04    0.03
   0   0  -2  563.77   25.61
   0   0  -3    0.17    0.11
   0   0  -4    8.81    0.63
   0   0  -5    0.03    0.16
   0   0   5    0.16    0.15
   0   0  -6  210.04   10.46
   0   0   6  232.08   10.37
   0   0  -7    0.25    0.22
   0   0   7    0.03    0.19
   0   0  -8  265.18   13.43
   0   0   8  298.88   13.30
   0   0  -9   -0.07    0.29
   0   0   9    0.09    0.22
   0   0 -10   58.61    3.62
   0   0 -10   65.94    3.34
   0   0  10   65.71    3.46
   0   0  11   -0.12    0.25
   0   0 -11   -0.17    0.21
   0   0 -11   -0.05    0.23
   0   0 -11    0.09    0.31
   0   0  11    0.12    0.19
   0   0  12  230.64   11.24
   0   0 -12  233.93   10.98
   0   0 -12  241.97   11.05
   0   0 -12  207.69   11.47
   0   0 -12  224.03   11.06
   0   0  12  242.36   10.99
   0   0  13    0.77    0.40
   0   0 -13   -0.05    0.31
   0   0 -13   -0.05    0.27
   0   0 -13    0.10    0.32
   0   0 -13    0.06    0.30
   0   0 -13    0.11    0.35
   0   0  13    0.56    0.29
   0   0  14  304.42   13.64
   0   0 -14  285.08   13.75
   0   0 -14  301.29   13.75
   0   0 -14  283.41   13.65
   0   0 -14  268.12   14.07
   0   0  14  286.32   13.96
   0   0 -15   -0.17    0.33
   0   0 -15    0.41    0.33
   0   0  15   -0.08    0.32
   0   0  15    0.15    0.30
   0   0  15   -0.04    0.20
   0   0 -15   -0.06    0.36
   0   0 -16   30.29    1.89
   0   0  16   28.43    1.78
   0   0  16   30.20    1.71
   0   0 -16   30.72    1.82
   0   0 -16   25.51    1.85
   0   0  17    0.17    0.26
   0   0  17   -0.07    0.20
   0   0 -17    0.36    0.33
   0   0 -17   -0.08    0.25
   0   0 -17    0.11    0.29
   0   0  18   10.79    0.72
   0   0 -18   10.29    0.85
   0   0  18   11.27    0.81
   0   0 -18    8.48    0.72
   0   0 -18    9.72    0.84
   0   0 -19   -0.06    0.18
   0   0 -19    0.07    0.17
   0   0  19    0.11    0.16
   0   0 -20   15.49    0.98
   0   0 -20   16.81    0.95
   0  -1   0   -0.02    0.16
   0  -1   0    0.17    0.08
   0  -1  -1  479.98   19.82
   0  -1  -1  433.74   19.72
   0  -1   1  418.14   19.79
   0  -1   1  397.49   19.78
   0  -1  -1  435.49   19.76
   0  -1   2  173.13    7.98
   0  -1  -2  182.29    7.99
   0   1   2  168.12    7.92
   0  -1  -2  180.50    7.99
   0  -1   2  179.66    7.98
   0  -1  -2  165.76    7.98
   0  -1  -2  172.28    7.94
   0  -1   2  170.94    7.94
   0  -1  -2  166.48    7.98
   0  -1   2  170.51    7.99
   0   1  -2  166.43    7.79
   0  -1  -2  164.61    7.88
   0  -1  -3  297.55   13.70
   0  -1   3  276.93   13.68
   0   1   3  297.78   13.70
   0  -1   3  296.86   13.70
   0  -1  -3  324.31   13.72
   0  -1   3  297.72   13.66
   0  -1  -3  292.65   13.65
   0   1  -3  304.23   13.59
   0  -1  -3  296.39   13.68
   0  -1   3  299.24   13.71
   0  -1  -3  289.84   13.70
   0  -1  -3  290.90   13.77
   0  -1  -4  380.27   17.06
   0  -1  -4  369.38   16.98
   0   1  -4  375.87   16.88
   0  -1  -4  370.46   16.87
   0  -1   4  357.31   16.86
   0   1   4  366.18   16.96
   0  -1  -4  369.80   16.91
   0  -1   4  365.37   16.91
   0  -1   4  367.81   16.92
   0  -1  -4  367.79   16.91
   0  -1  -5  119.27    5.64
   0  -1  -5  122.37    5.61
   0   1  -5  120.73    5.49
   0  -1  -5  114.61    5.37
   0  -1   5  111.82    5.36
   0  -1   5  108.27    5.40
   0   1   5  115.39    5.53
   0  -1   5  116.05    5.41
   0  -1  -5  113.91    5.40
   0  -1   5  113.43    5.42
   0  -1  -5  113.00    5.41
   0  -1  -6  130.56    6.22
   0   1  -6  135.32    6.09
   0  -1  -6  127.22    6.18
   0  -1   6  122.08    5.84
   0  -1  -6  126.82    5.84
   0  -1   6  127.09    5.89
   0   1   6  130.74    6.11
   0  -1   6  124.92    5.97
   0  -1   6  124.38    5.88
   0  -1  -6  120.91    5.86
   0  -1  -7   44.38    2.24
   0   1  -7   47.63    2.44
   0  -1  -7   39.77    2.47
   0  -1  -7   43.75    2.53
   0   1   7   42.40    2.39
   0  -1   7   42.07    2.29
   0   1  -8  162.46    7.42
   0  -1  -8  154.08    7.41
   0  -1  -8  144.94    7.72
   0   1  -8  157.47    7.65
   0  -1  -8  160.45    7.77
   0   1   8  162.87    7.63
   0  -1   8  152.85    7.49
   0   1  -9    0.62    0.23
   0   1  -9    0.32    0.29
   0  -1  -9    0.40    0.19
   0  -1  -9    0.30    0.30
   0  -1   9    0.28    0.20
   0   1   9    0.22    0.28
   0  -1 -10   50.83    2.79
   0   1 -10   50.04    3.05
   0   1 -10   57.60    2.85
   0  -1  10   51.60    2.90
   0  -1 -10   52.40    3.18
   0   1  11  181.47    8.72
   0  -1  11  186.58    8.76
   0  -1  11  183.11    8.96
   0   1 -11  190.35    8.87
   0  -1 -11  185.18    8.85
   0   1 -11  175.20    9.15
   0  -1  11  186.27    8.60
   0  -1  11  185.91    8.67
   0  -1 -11  179.12    8.79
   0  -1 -11  187.09    9.33
   0  -1  12    1.58    0.39
   0   1 -12    2.04    0.55
   0  -1 -12    3.33    0.67
   0   1 -12    2.16    0.43
   0  -1 -12    1.58    0.40
   0  -1  12    2.56    0.34
   0  -1  12    2.40    0.32
   0   1  12    2.34    0.38
   0  -1  12    2.47    0.39
   0  -1 -12    2.16    0.42
   0   1 -12    2.23    0.42
   0   1 -13   74.33    3.73
   0   1  13   69.96    3.63
   0  -1  13   77.28    3.69
   0   1  13   70.65    4.02
   0   1 -13   70.88    3.76
   0  -1 -13   66.12    3.73
   0  -1  13   70.46    3.54
   0  -1 -13   61.06    4.10
   0  -1 -13   66.06    3.70
   0  -1 -14   28.54    1.81
   0   1 -14   29.91    1.81
   0  -1 -14   28.48    1.81
   0   1  14   28.51    1.70
   0  -1  14   30.23    1.75
   0   1  14   29.65    2.07
   0  -1  14   22.35    1.98
   0  -1  14   27.73    1.61
   0   1 -14   27.04    1.81
   0  -1 -14   26.43    1.80
   0  -1 -14   25.15    2.15
   0  -1 -15    3.68    0.63
   0  -1 -15    2.60    0.49
   0   1 -15    2.30    0.45
   0  -1 -15    2.49    0.50
   0   1 -15    2.58    0.48
   0  -1 -15    2.32    0.49
   0  -1  15    2.26    0.53
   0  -1  15    1.76    0.41
   0   1  15    2.05    0.41
   0   1  15    1.83    0.50
   0  -1 -16   51.38    3.05
   0   1 -16   54.81    3.07
   0   1 -16   54.83    3.02
   0  -1 -16   55.85    3.10
   0  -1 -16   55.22    3.05
   0   1  16   57.92    2.96
   0   1  16   58.62    2.98
   0  -1  16   55.94    2.98
   0  -1 -17   14.94    1.13
   0  -1 -17   18.32    1.36
   0   1  17   18.43    1.12
   0   1 -17   15.98    1.11
   0  -1 -17   14.95    1.17
   0  -1 -17   14.98    1.15
   0   1 -17   14.69    1.13
   0  -1  17   16.15    1.10
   0   1  17   15.02    1.04
   0  -1 -18    2.68    0.46
   0   1 -18    1.71    0.31
   0  -1 -18    1.90    0.36
   0  -1 -18    2.42    0.40
   0   1  18    2.00    0.31
   0  -1  18    1.42    0.30
   0   1  18    1.89    0.30
   0   1 -18    1.86    0.33
   0  -1 -18    1.50    0.33
   0  -1 -19   14.02    0.95
   0   1 -19   14.82    0.95
   0  -1 -19   15.08    1.05
   0  -1  19   16.05    0.90
   0   1  19   16.36    0.91
   0   1 -19   12.85    0.87
   0  -1 -19   16.20    1.00
   0  -1 -20    0.60    0.17
   0  -1  20    0.87    0.16
   0   1 -20    0.62    0.16
   0  -1 -20    0.88    0.19
   0   1  20    0.96    0.13
   0   1  20    0.66    0.12
   0  -2   0  112.86    5.68
   0  -2   0  114.67    5.79
   0  -2   0  123.83    5.52
   0  -2   0  118.40    5.82
   0  -2   0  107.27    5.70
   0  -2   0  114.58    5.81
   0  -2   1   36.37    2.11
   0  -2   1   41.32    2.25
   0  -2  -1   36.65    2.07
   0   2   1   33.88    1.98
   0  -2  -1   37.92    1.95
   0  -2  -1   37.95    2.23
   0  -2  -1   38.37    2.14
   0  -2   1   36.51    2.20
   0  -2  -2   69.37    3.79
   0  -2   2   70.43    3.75
   0  -2  -2   76.40    3.68
   0  -2   2   75.45    3.82
   0   2   2   68.48    3.62
   0  -2  -2   71.98    3.59
   0  -2   2   75.44    3.83
   0  -2  -2   77.44    3.85
   0  -2  -2   70.83    3.80
   0  -2   2   69.09    3.79
   0  -2   2   69.86    3.71
   0  -2  -2   72.52    3.73
   0  -2  -3  102.68    5.04
   0  -2   3  102.43    5.03
   0  -2  -3   98.11    4.94
   0  -2   3   98.40    4.95
   0  -2   3   93.95    5.01
   0  -2  -3  106.79    5.08
   0   2   3   98.19    4.91
   0  -2  -3   95.67    4.87
   0  -2  -4  130.68    6.33
   0  -2   4  135.60    6.36
   0   2   4  135.97    6.26
   0  -2   4  129.27    6.31
   0  -2  -4  133.51    6.33
   0  -2  -4  121.27    5.96
   0  -2   4  122.98    5.96
   0  -2  -4  132.89    6.45
   0  -2   4  124.32    5.96
   0  -2  -4  128.60    5.98
   0  -2  -4  132.33    6.23
   0  -2   4  126.30    6.21
   0  -2   5  189.87    9.05
   0  -2  -5  192.85    9.06
   0   2   5  203.84    9.05
   0  -2   5  188.90    9.16
   0  -2  -5  192.40    9.03
   0  -2   5  188.48    9.03
   0  -2   5  178.68    8.68
   0  -2  -5  186.78    8.69
   0  -2  -5  183.59    8.69
   0  -2  -5  196.26    9.26
   0  -2   5  188.17    8.69
   0  -2  -5  197.89    8.96
   0  -2   5  183.13    8.92
   0  -2  -6  431.10   18.64
   0  -2   6  391.73   18.60
   0  -2  -6  427.34   18.93
   0  -2   6  401.17   18.26
   0  -2  -6  403.92   18.27
   0   2   6  411.34   18.66
   0  -2   6  394.78   18.49
   0  -2  -6  408.06   18.50
   0  -2  -6  410.47   18.59
   0  -2   6  406.13   18.58
   0  -2   6  438.01   18.89
   0  -2   6  374.61   18.24
   0  -2  -6  389.69   18.25
   0  -2  -7    0.25    0.19
   0  -2   7    0.21    0.20
   0  -2   7    0.31    0.30
   0  -2   7    0.26    0.19
   0  -2  -7    0.13    0.16
   0   2   7    0.54    0.31
   0  -2  -7    0.34    0.35
   0  -2  -7    0.13    0.12
   0  -2   7    0.33    0.17
   0  -2  -8    2.09    0.30
   0  -2  -8    2.23    0.55
   0  -2  -8    1.96    0.31
   0  -2   8    2.76    0.57
   0   2   8    2.93    0.51
   0  -2   8    2.54    0.33
   0  -2   9    1.32    0.43
   0  -2  -9    1.19    0.29
   0  -2  -9    1.24    0.27
   0   2   9    1.72    0.44
   0  -2  -9    0.72    0.41
   0  -2  -9    1.05    0.25
   0  -2   9    0.77    0.25
   0  -2   9    1.13    0.25
   0  -2   9    1.14    0.25
   0  -2  -9    1.16    0.40
   0   2  10   23.94    1.76
   0  -2 -10   25.37    1.47
   0   2 -10   23.69    1.41
   0  -2 -10   21.48    1.55
   0  -2  10   21.55    1.38
   0  -2  10   23.57    1.41
   0  -2  10   26.29    1.40
   0  -2 -10   24.27    1.68
   0  -2 -10   21.00    1.45
   0  -2 -10   24.35    1.50
   0  -2  10   22.18    1.37
   0  -2 -10   23.28    1.96
   0  -2  10   24.75    1.93
   0  -2 -11    4.97    0.69
   0  -2  11    4.33    0.48
   0  -2 -11    4.47    0.55
   0   2  11    4.58    0.70
   0  -2 -11    3.75    0.51
   0  -2 -11    4.89    0.84
   0   2 -11    4.19    0.48
   0  -2 -11    3.68    0.57
   0  -2  11    3.84    0.45
   0  -2  11    4.72    0.80
   0  -2  11    5.17    0.50
   0  -2  11    4.95    0.52
   0  -2  12   12.93    1.38
   0  -2 -12   11.84    1.37
   0   2 -12   13.48    0.98
   0  -2 -12   10.92    0.98
   0   2  12   13.98    1.29
   0  -2 -12   11.54    0.95
   0   2 -12   11.97    0.93
   0  -2 -12   10.93    1.01
   0  -2  12   12.23    0.87
   0  -2  12   12.60    0.92
   0  -2  12   13.25    0.89
   0  -2  12   12.99    0.93
   0  -2  13    2.41    0.38
   0  -2 -13    1.71    0.42
   0   2 -13    2.31    0.40
   0   2  13    1.97    0.52
   0   2 -13    2.20    0.39
   0  -2 -13    2.29    0.39
   0  -2 -13    1.64    0.53
   0  -2 -13    1.48    0.38
   0  -2  13    1.76    0.32
   0  -2  13    1.98    0.37
   0  -2  13    2.28    0.36
   0  -2  13    3.24    0.70
   0  -2  14   46.17    2.28
   0  -2  14   43.48    2.18
   0  -2  14   39.56    2.11
   0  -2 -14   35.57    2.28
   0  -2  14   41.81    2.85
   0  -2 -14   41.88    2.41
   0   2 -14   40.47    2.26
   0  -2 -14   41.30    2.40
   0  -2 -14   40.73    2.93
   0   2  14   42.26    2.68
   0  -2  14   41.12    2.24
   0   2  14   37.80    2.14
   0   2 -14   38.55    2.26
   0  -2 -14   40.79    2.32
   0   2 -15    0.36    0.20
   0  -2 -15    0.71    0.28
   0  -2  15    0.36    0.20
   0   2  15    0.25    0.17
   0   2  15    0.42    0.27
   0  -2  15    0.42    0.23
   0  -2 -15    0.86    0.33
   0  -2 -15    0.56    0.33
   0   2 -15    0.41    0.26
   0  -2  16    0.18    0.17
   0   2  16    0.04    0.24
   0  -2 -16    0.27    0.26
   0  -2 -16   -0.05    0.28
   0  -2 -16    0.15    0.20
   0   2  17    0.46    0.22
   0  -2  17    0.10    0.20
   0  -2  17    0.29    0.17
   0  -2 -17    0.23    0.26
   0  -2  18   10.94    0.71
   0  -2 -18    9.14    0.73
   0   2  18   10.49    0.70
   0   2  19    1.97    0.23
   0  -2  19    1.90    0.21
   0   2  19    1.77    0.22
   0  -2 -19    1.85    0.24
   0  -2  19    2.18    0.25
   0  -2 -19    1.83    0.28
   0  -3   0   -0.14    0.22
   0  -3   0   -0.17    0.29
   0   3   0   -0.04    0.14
   0  -3   0    0.09    0.27
   0  -3   0    0.13    0.18
   0  -3   0    0.03    0.20
   0  -3   0    0.07    0.33
   0  -3  -1    0.27    0.25
   0  -3   1    0.17    0.29
   0  -3   1    0.07    0.25
   0   3   1   -0.09    0.18
   0  -3   1   -0.09    0.27
   0  -3  -1    0.43    0.35
   0  -3  -1    0.13    0.22
   0  -3  -1    0.16    0.20
   0  -3   2    4.82    0.48
   0  -3  -2    4.27    0.46
   0   3   2    4.00    0.52
   0  -3   2    5.19    0.73
   0  -3  -2    4.50    0.71
   0  -3   2    4.07    0.67
   0  -3  -2    3.75    0.66
   0  -3   2    4.82    0.77
   0  -3  -2    4.69    0.69
   0  -3   2    4.46    0.68
   0  -3   2    4.88    0.48
   0  -3  -2    4.89    0.49
   0  -3  -3   46.54    2.74
   0  -3   3   42.33    2.66
   0  -3   3   42.41    2.76
   0  -3  -3   43.46    2.77
   0  -3   3   46.26    2.83
   0  -3  -3   44.21    2.56
   0  -3   3   41.12    2.78
   0  -3  -3   47.89    2.89
   0  -3  -3   44.58    2.42
   0  -3  -3   48.28    2.37
   0  -3   3   44.37    2.33
   0   3   3   42.56    2.52
   0  -3  -3   45.48    2.34
   0  -3   3   39.20    2.27
   0  -3   3   43.31    2.31
   0  -3   3   49.90    2.55
   0  -3  -4   83.11    3.95
   0  -3   4   80.67    3.94
   0  -3   4   70.21    3.89
   0  -3   4   70.05    3.94
   0  -3   4   79.32    4.42
   0  -3   4   75.05    3.99
   0  -3   4   86.30    4.59
   0  -3  -4   86.30    4.49
   0  -3  -4   87.59    4.38
   0  -3   4   82.99    4.34
   0  -3   4   72.39    3.96
   0  -3   4   91.89    4.19
   0  -3  -4   83.84    4.26
   0  -3  -4   73.29    4.18
   0  -3   4   78.66    4.08
   0  -3  -4   84.11    4.51
   0  -3   4   71.34    3.99
   0  -3   4   82.73    4.51
   0  -3  -4   87.12    4.10
   0  -3  -4   74.90    4.05
   0  -3  -4   87.02    3.99
   0  -3   4   85.93    3.98
   0   3   4   81.23    4.22
   0  -3  -4   71.67    4.06
   0  -3   4   74.70    4.02
   0  -3   4   80.81    4.07
   0  -3  -4   96.97    4.16
   0  -3   4   94.30    4.23
   0  -3  -4   85.10    4.10
   0  -3   5   31.57    1.71
   0  -3  -5   32.65    1.72
   0  -3   5   24.89    1.66
   0  -3   5   32.04    1.79
   0  -3   5   30.09    1.76
   0  -3   5   32.79    2.16
   0  -3  -5   33.04    2.16
   0  -3  -5   26.67    1.72
   0  -3   5   33.34    2.31
   0  -3   5   27.06    1.73
   0  -3  -5   31.40    2.03
   0  -3   5   32.03    2.04
   0  -3   5   29.45    1.70
   0  -3   5   30.06    1.76
   0  -3  -5   32.65    2.03
   0  -3   5   35.10    1.90
   0  -3  -5   30.72    1.99
   0  -3   5   38.30    2.01
   0  -3   5   28.24    1.76
   0  -3   5   33.73    2.21
   0  -3  -5   33.56    2.20
   0  -3  -5   29.80    1.76
   0  -3  -5   34.59    1.88
   0  -3  -5   31.97    1.86
   0  -3  -5   34.34    1.76
   0  -3   5   33.26    1.74
   0  -3   5   30.44    1.81
   0  -3   5   29.58    1.80
   0  -3  -5   29.39    1.85
   0   3   5   34.88    2.06
   0  -3  -5   28.15    1.93
   0  -3   5   36.78    2.00
   0  -3  -5   29.89    1.84
   0  -3  -5   34.86    1.87
   0  -3   5   32.17    1.84
   0  -3   6    1.05    0.23
   0  -3  -6    1.11    0.32
   0  -3  -6    2.17    0.38
   0  -3   6    1.33    0.32
   0  -3  -6    1.53    0.26
   0  -3  -6    1.75    0.41
   0  -3   6    2.48    0.46
   0  -3   6    2.38    0.30
   0  -3  -6    2.34    0.45
   0  -3   6    1.51    0.32
   0  -3   6    0.87    0.23
   0  -3   6    0.89    0.26
   0  -3   6    1.55    0.41
   0  -3  -6    1.67    0.39
   0  -3  -6    1.21    0.27
   0  -3   6    1.33    0.27
   0  -3  -6    1.59    0.36
   0  -3  -6    1.47    0.35
   0  -3  -6    1.29    0.29
   0   3   6    2.12    0.45
   0  -3  -6    1.61    0.38
   0  -3  -6    0.85    0.29
   0  -3   6    1.49    0.31
   0  -3   6    0.79    0.27
   0  -3   6    1.58    0.30
   0  -3  -6    0.94    0.24
   0  -3  -6    0.91    0.36
   0  -3   6    1.33    0.26
   0  -3   6    1.66    0.42
   0  -3   7   42.89    2.09
   0  -3   7   32.68    2.09
   0  -3  -7   42.35    2.08
   0  -3   7   36.33    2.19
   0  -3  -7   37.15    2.24
   0  -3   7   43.30    2.40
   0  -3  -7   42.71    2.41
   0  -3  -7   44.17    2.55
   0  -3  -7   38.68    2.44
   0  -3   7   36.83    2.14
   0  -3  -7   41.77    2.16
   0  -3  -7   49.65    2.37
   0  -3  -7   41.09    2.32
   0  -3  -7   37.43    2.19
   0  -3  -7   39.16    2.12
   0  -3   7   42.99    2.52
   0  -3  -7   43.68    2.53
   0  -3  -7   35.88    2.26
   0  -3   7   39.79    2.29
   0  -3   7   40.45    2.26
   0  -3   7   42.35    2.22
   0  -3  -7   37.11    2.46
   0   3   7   40.29    2.50
   0  -3  -8    7.38    0.85
   0  -3  -8    7.72    0.89
   0  -3   8    7.45    0.65
   0  -3   8    8.03    0.74
   0  -3  -8    7.33    0.69
   0  -3   8    8.33    0.68
   0  -3   8    8.17    0.75
   0   3   8    7.88    0.90
   0  -3  -8    6.24    0.84
   0  -3   8    6.77    0.68
   0  -3  -8    7.32    0.73
   0  -3  -8    6.56    0.65
   0  -3   8    5.25    0.58
   0  -3   8    7.05    0.53
   0  -3   8    7.90    0.73
   0  -3   8    7.15    1.03
   0  -3  -9    0.40    0.28
   0  -3   9    0.80    0.30
   0  -3   9    0.27    0.20
   0  -3   9    0.93    0.31
   0  -3  -9    0.37    0.35
   0  -3  -9    0.58    0.32
   0  -3  -9    0.09    0.21
   0  -3   9   -0.12    0.39
   0  -3   9    0.51    0.20
   0  -3   9    0.33    0.24
   0   3   9    0.81    0.37
   0  -3  -9    0.88    0.27
   0  -3   9    0.70    0.26
   0  -3   9    0.39    0.21
   0   3  10   46.42    2.80
   0  -3  10   45.01    2.40
   0  -3 -10   43.93    2.46
   0  -3 -10   40.73    2.41
   0  -3  10   44.01    3.08
   0  -3  10   34.55    2.28
   0  -3  10   48.41    2.53
   0  -3  10   48.49    2.53
   0  -3 -10   38.88    2.56
   0  -3 -10   43.08    2.71
   0  -3  10   44.17    2.38
   0  -3  10   48.40    2.38
   0  -3 -11   13.26    1.23
   0  -3 -11   12.92    1.13
   0   3  11   13.06    0.92
   0   3  11   14.77    1.32
   0  -3  11   14.05    0.98
   0  -3 -11   12.45    0.99
   0  -3 -11   12.74    1.00
   0  -3  11   12.36    1.41
   0  -3  11   10.18    0.88
   0  -3  11   14.22    1.08
   0  -3  11   14.51    1.09
   0  -3  11   13.73    0.99
   0  -3  11   14.50    0.96
   0  -3 -12   15.21    1.28
   0  -3 -12   19.78    1.52
   0   3  12   20.34    1.18
   0   3  12   16.44    1.47
   0  -3 -12   18.43    1.21
   0  -3 -12   16.91    1.22
   0  -3  12   15.48    1.64
   0  -3  12   20.10    1.19
   0  -3  12   20.63    1.33
   0  -3  12   18.55    1.30
   0  -3  12   19.17    1.17
   0  -3  12   13.82    1.08
   0  -3  13    2.13    0.31
   0  -3 -13    3.22    0.45
   0  -3  13    3.05    0.46
   0  -3  13    1.91    0.41
   0  -3 -13    2.05    0.39
   0  -3  13    2.50    0.37
   0   3  13    2.21    0.34
   0  -3 -13    2.64    0.54
   0  -3  13    1.79    0.32
   0  -3  14    1.32    0.35
   0  -3 -14    1.92    0.47
   0   3  14    1.33    0.28
   0  -3  14    1.30    0.29
   0  -3  14    1.26    0.30
   0  -3  14    1.44    0.24
   0  -3 -14    0.85    0.27
   0   3  15    3.79    0.38
   0  -3 -15    3.44    0.42
   0  -3 -15    3.19    0.53
   0  -3  15    3.78    0.47
   0  -3  15    3.96    0.33
   0  -3  16    0.12    0.17
   0   3  16    0.29    0.16
   0  -3 -16   -0.12    0.27
   0   3  16    0.02    0.13
   0  -3 -16    0.12    0.15
   0  -3 -16   -0.09    0.16
   0   3  17    2.76    0.25
   0   3  17    2.66    0.24
   0  -3  17    3.00    0.31
   0  -3 -17    2.34    0.27
   0  -3  17    3.20    0.31
   0  -4   0   18.66    1.58
   0  -4   0   13.84    1.11
   0  -4   0   19.02    1.22
   0  -4   0   16.24    1.05
   0  -4   0   18.81    1.45
   0  -4   0   16.64    1.36
   0  -4   0   17.13    1.26
   0  -4   0   18.33    1.75
   0  -4   0   20.00    1.30
   0  -4   0   18.79    1.27
   0  -4   0   19.85    1.41
   0  -4   0   20.62    1.37
   0  -4   0   17.67    1.22
   0  -4   0   17.66    1.27
   0  -4   0   18.53    1.68
   0  -4   0   16.82    1.21
   0  -4  -1    6.51    0.91
   0  -4   1    5.57    0.60
   0  -4  -1    5.31    0.57
   0  -4  -1    6.59    0.66
   0  -4   1    7.55    1.02
   0  -4   1    6.86    0.71
   0  -4  -1    5.74    0.79
   0  -4  -1    6.37    0.69
   0  -4   1    7.02    0.70
   0  -4   1    7.50    0.72
   0  -4  -1    8.37    0.76
   0  -4  -1    8.42    0.76
   0  -4   1    6.98    0.80
   0  -4  -1    7.57    0.80
   0  -4   1    7.59    0.67
   0  -4  -1    7.30    0.78
   0  -4  -1    5.78    0.65
   0  -4   1    7.17    0.67
   0  -4   1    5.65    0.54
   0  -4   1    8.40    0.87
   0  -4   1    6.48    0.77
   0  -4  -1    6.44    0.77
   0  -4   1    6.69    0.70
   0  -4   1    7.77    1.02
   0  -4   1    6.25    0.71
   0  -4  -1    7.21    0.70
   0  -4  -1    6.93    0.77
   0  -4   1    7.14    0.68
   0  -4   2    0.27    0.29
   0  -4  -2    0.24    0.28
   0  -4  -2    0.36    0.35
   0  -4   2    0.09    0.35
   0  -4  -2    1.63    0.28
   0  -4   2    0.23    0.22
   0  -4   2    0.47    0.21
   0  -4  -2    0.86    0.35
   0  -4   2    0.12    0.27
   0  -4   2    0.49    0.29
   0  -4   2    0.70    0.40
   0  -4  -2    0.49    0.36
   0  -4  -2   -0.05    0.28
   0  -4  -2    0.39    0.36
   0  -4  -2    0.41    0.29
   0  -4   2    0.47    0.33
   0  -4  -2    0.70    0.36
   0  -4   2    0.77    0.31
   0  -4   2    0.49    0.38
   0  -4   2    0.18    0.24
   0  -4   2    0.76    0.36
   0  -4  -2    0.21    0.36
   0  -4   2    0.30    0.21
   0  -4  -2    0.38    0.26
   0  -4  -2    0.76    0.43
   0  -4   2    0.09    0.24
   0  -4   2    0.11    0.31
   0  -4  -2    0.28    0.24
   0  -4   2    0.52    0.40
   0  -4   2    0.05    0.26
   0  -4  -2    0.23    0.33
   0  -4   2    0.44    0.24
   0  -4   3   63.92    3.80
   0  -4  -3   68.20    3.85
   0  -4   3   61.43    3.35
   0  -4   3   69.30    3.37
   0  -4  -3   65.71    3.36
   0  -4   3   78.22    3.72
   0  -4   3   68.53    3.61
   0  -4  -3   64.86    3.71
   0  -4  -3   65.62    3.45
   0  -4   3   66.78    3.46
   0  -4  -3   67.27    3.52
   0  -4   3   71.25    3.42
   0  -4  -3   62.80    3.48
   0  -4   3   67.91    3.41
   0  -4   3   66.22    3.34
   0  -4   3   56.40    3.29
   0  -4  -3   56.46    3.88
   0  -4   3   65.10    3.43
   0  -4   3   61.80    3.98
   0  -4  -3   61.73    3.41
   0  -4   3   62.37    3.93
   0  -4  -3   63.37    3.54
   0  -4   3   69.93    3.54
   0  -4   3   60.93    3.41
   0  -4  -3   54.40    3.41
   0  -4  -3   71.70    3.56
   0  -4  -3   61.70    3.50
   0  -4   3   77.86    3.73
   0  -4   3   73.27    3.58
   0  -4   4    2.05    0.46
   0  -4  -4    0.63    0.41
   0  -4   4    1.41    0.33
   0  -4   4    1.87    0.37
   0  -4  -4    1.82    0.37
   0  -4  -4    0.76    0.40
   0  -4   4    2.00    0.51
   0  -4  -4    1.95    0.52
   0  -4   4    1.36    0.35
   0  -4  -4    2.28    0.39
   0  -4  -4    1.45    0.38
   0  -4  -4    2.11    0.50
   0  -4   4    1.75    0.36
   0  -4   4    1.61    0.33
   0  -4  -4    1.27    0.38
   0  -4   4    1.81    0.55
   0  -4  -4    1.62    0.51
   0  -4   4    2.28    0.40
   0  -4  -4    1.91    0.39
   0  -4   4    0.80    0.45
   0  -4   4    2.59    0.46
   0  -4  -4    1.51    0.41
   0  -4   4    1.73    0.36
   0  -4   4    2.08    0.35
   0  -4  -4    1.31    0.36
   0  -4   4    2.49    0.56
   0  -4   5   35.81    2.06
   0  -4  -5   37.51    2.08
   0  -4  -5   35.30    2.13
   0  -4  -5   35.71    2.17
   0  -4   5   35.43    2.62
   0  -4   5   33.87    2.45
   0  -4  -5   36.22    2.02
   0  -4  -5   34.33    2.44
   0  -4   5   35.32    2.03
   0  -4   5   33.50    2.07
   0  -4   5   35.24    2.09
   0  -4  -5   30.94    2.09
   0  -4   5   33.64    2.01
   0  -4   5   37.27    2.03
   0  -4  -5   34.30    2.30
   0  -4   5   43.03    2.25
   0  -4  -5   35.07    2.27
   0  -4   5   36.49    2.02
   0  -4   5   34.33    1.91
   0  -4   5   39.76    2.00
   0  -4  -5   37.31    2.39
   0  -4   5   36.07    2.36
   0  -4  -5   38.77    2.01
   0  -4  -5   30.66    2.08
   0  -4  -6    0.70    0.32
   0  -4  -6    0.15    0.31
   0  -4  -6    0.88    0.27
   0  -4   6    0.58    0.26
   0  -4   6    0.47    0.38
   0  -4   6    0.17    0.27
   0  -4   6    0.89    0.27
   0  -4  -6    0.79    0.35
   0  -4   6    0.71    0.34
   0  -4  -6    0.74    0.26
   0  -4  -6    0.63    0.35
   0  -4   6    0.46    0.20
   0  -4   6    0.73    0.28
   0  -4  -6    0.54    0.25
   0  -4  -6    0.37    0.39
   0  -4   6    0.38    0.22
   0  -4   6    0.26    0.28
   0  -4   6    0.54    0.26
   0  -4   6    0.33    0.26
   0  -4  -6    0.77    0.32
   0  -4   6    0.81    0.28
   0  -4  -6    0.52    0.31
   0  -4  -7    7.65    0.77
   0  -4  -7    7.51    0.80
   0  -4   7    7.33    0.70
   0  -4   7    8.19    0.73
   0  -4   7    7.45    0.73
   0  -4  -7    7.05    0.73
   0  -4   7   10.42    0.78
   0  -4  -7    6.84    0.63
   0  -4   7    8.26    0.67
   0  -4   7    8.19    0.70
   0  -4   7    8.54    1.13
   0  -4   7    7.93    0.65
   0  -4  -7    8.77    0.69
   0  -4   7    9.15    0.70
   0  -4  -7    6.45    0.87
   0  -4  -7    6.33    0.70
   0  -4  -7    7.58    0.86
   0  -4   8   46.31    2.63
   0  -4   8   49.85    2.57
   0  -4   8   52.41    2.62
   0  -4  -8   47.20    2.84
   0  -4  -8   47.34    2.92
   0  -4  -8   49.70    2.52
   0  -4  -8   42.82    2.60
   0  -4   8   56.44    2.65
   0  -4  -8   48.10    2.49
   0  -4   8   44.73    2.65
   0  -4  -8   48.47    2.75
   0  -4  -8   52.62    2.73
   0  -4   9    2.37    0.40
   0  -4   9    2.47    0.37
   0  -4  -9    2.73    0.53
   0  -4  -9    2.64    0.60
   0  -4   9    2.34    0.42
   0  -4   9    3.54    0.44
   0  -4   9    3.00    0.44
   0  -4  -9    2.83    0.48
   0  -4  10    0.20    0.23
   0  -4  10   -0.03    0.21
   0  -4 -10    0.10    0.22
   0  -4 -10    0.31    0.33
   0  -4  10   -0.16    0.26
   0  -4  10    0.16    0.24
   0  -4 -10    0.94    0.31
   0  -4  11    3.40    0.39
   0  -4  11    3.21    0.38
   0  -4 -11    3.16    0.47
   0  -4 -11    3.12    0.56
   0  -4  11    3.51    0.43
   0  -4  11    3.74    0.44
   0  -4 -11    3.23    0.48
   0  -4 -11    3.66    0.44
   0  -4  12    1.24    0.26
   0  -4 -12    1.55    0.29
   0  -4 -12    1.13    0.29
   0  -4 -12    0.83    0.35
   0  -4  12    0.88    0.22
   0  -4  12    1.14    0.27
   0  -4  12    0.99    0.25
   0  -4  13   14.62    0.86
   0  -4  13   12.31    0.87
   0  -4  13   16.60    0.87
   0  -4  13   14.98    0.91
   0  -4 -13   13.02    0.93
   0  -4 -13   13.17    1.04
   0  -4  14    1.09    0.16
   0  -4 -14    1.34    0.29
   0  -4 -14    0.78    0.21
   0  -4  14    1.33    0.22
   0  -4  14    0.82    0.17
   0  -4 -15    0.32    0.13
   0  -4  15    0.20    0.08
   0  -4 -15    0.45    0.12
   0  -5   0   -0.26    0.37
   0  -5   0    0.23    0.28
   0  -5   0    0.21    0.28
   0  -5   0    0.05    0.35
   0  -5   0   -0.04    0.27
   0  -5   1   16.11    1.10
   0  -5   1   16.11    1.12
   0  -5  -1   15.28    1.14
   0  -5   1   15.30    1.15
   0  -5  -1   17.47    1.13
   0  -5   1   17.91    1.25
   0  -5  -1   18.57    1.28
   0  -5  -1   16.35    1.25
   0  -5   2   13.03    0.98
   0  -5  -2    8.19    0.90
   0  -5  -2   11.53    0.98
   0  -5   2   10.86    0.88
   0  -5   2   12.62    0.86
   0  -5  -2   10.99    0.88
   0  -5  -2   11.21    0.83
   0  -5  -2   11.00    0.84
   0  -5   2   10.19    0.83
   0  -5  -2    9.57    0.85
   0  -5  -2   10.34    0.85
   0  -5  -3    6.81    0.77
   0  -5   3    8.85    0.79
   0  -5   3    6.70    0.54
   0  -5  -3    7.56    0.68
   0  -5   3    7.88    0.66
   0  -5  -3    7.43    0.65
   0  -5  -3    5.99    0.62
   0  -5   3    7.63    0.63
   0  -5  -3    7.97    0.64
   0  -5   3    8.06    0.69
   0  -5  -3    6.56    0.67
   0  -5  -4    2.15    0.41
   0  -5   4    2.14    0.28
   0  -5  -4    1.98    0.39
   0  -5   4    3.00    0.42
   0  -5   4    2.78    0.32
   0  -5   4    3.47    0.41
   0  -5  -4    3.04    0.39
   0  -5  -4    2.01    0.44
   0  -5  -4    1.55    0.33
   0  -5  -4    2.21    0.35
   0  -5   4    2.64    0.37
   0  -5   5    0.83    0.20
   0  -5   5    0.78    0.29
   0  -5  -5    0.72    0.26
   0  -5   5    0.48    0.21
   0  -5  -5    0.68    0.22
   0  -5   5    1.14    0.24
   0  -5   5    0.83    0.25
   0  -5  -5    0.99    0.25
   0  -5  -5    0.37    0.29
   0  -5  -5    0.62    0.31
   0  -5  -5    0.39    0.21
   0  -5   6    1.62    0.26
   0  -5   6    1.68    0.32
   0  -5  -6    1.28    0.26
   0  -5  -6    1.25    0.34
   0  -5   6    1.45    0.25
   0  -5  -6    0.91    0.34
   0  -5   6    1.71    0.26
   0  -5   6    1.67    0.25
   0  -5  -6    1.87    0.26
   0  -5  -6    1.78    0.35
   0  -5  -7    1.17    0.29
   0  -5   7    1.44    0.20
   0  -5  -7    1.69    0.31
   0  -5  -7    0.94    0.31
   0  -5   7    1.39    0.22
   0  -5   7    1.42    0.24
   0  -5   8    3.40    0.32
   0  -5  -8    2.65    0.41
   0  -5  -8    3.35    0.39
   0  -5  -8    2.81    0.38
   0  -5   8    3.76    0.33
   0  -5  -9    5.91    0.45
   0  -5   9    5.87    0.41
   0  -5  -9    4.37    0.43
   0  -5  -9    5.11    0.50
   0  -5   9    5.26    0.39
   0  -5  10    1.09    0.16
   0  -5  10    1.01    0.16
   0  -5 -10    0.81    0.20
   0  -5 -11    0.14    0.09
   1   0 -20    0.82    0.19
  -1   0  20    0.98    0.15
   1   0 -20    1.15    0.25
   1   0 -19    0.04    0.17
   1   0 -19   -0.03    0.18
  -1   0  18    0.60    0.20
  -1   0  18    0.46    0.25
   1   0 -18    0.57    0.27
   1   0 -18    0.12    0.18
   1   0 -18    0.60    0.29
  -1   0  17    0.27    0.21
  -1   0  17    0.08    0.25
   1   0 -17    0.41    0.29
   1   0 -17   -0.20    0.24
   1   0 -17   -0.17    0.31
  -1   0  16   64.09    3.23
   1   0 -16   61.63    3.31
  -1   0  16   61.55    3.12
  -1   0  16   51.17    3.41
   1   0 -16   61.11    3.21
   1   0 -16   56.75    3.31
  -1   0  15   -0.09    0.28
  -1   0  15    0.29    0.27
  -1   0  15    0.12    0.20
   1   0 -15    0.25    0.32
   1   0 -15   -0.23    0.36
   1   0 -15   -0.13    0.33
   1   0 -15    0.11    0.32
   1   0 -15   -0.12    0.27
  -1   0  14  123.25    5.80
  -1   0  14  116.28    5.69
   1   0 -14  111.30    6.31
   1   0 -14  123.39    5.89
  -1   0  14  114.64    6.11
   1   0 -14  117.36    5.80
   1   0 -14  101.24    6.32
   1   0 -14  112.46    5.91
   1   0 -13   -0.12    0.31
   1   0 -13    0.11    0.35
  -1   0  13    0.27    0.22
  -1   0  13   -0.24    0.29
   1   0 -13    0.21    0.29
   1   0 -13    0.19    0.27
   1   0 -12    5.80    0.67
   1   0 -12    5.72    0.86
  -1   0  12    7.56    0.68
  -1   0  12    7.48    0.82
   1   0 -12    7.63    0.72
   1   0 -12    6.78    0.68
  -1   0  11    0.06    0.25
  -1   0  11   -0.08    0.19
   1   0 -11   -0.09    0.40
   1   0 -10    7.49    0.93
  -1   0  10   11.94    0.95
   1   0  -9    0.28    0.35
  -1   0   9    0.43    0.28
   1   0  -8   85.79    4.60
  -1   0   8   91.71    4.47
   1   0  -7    0.10    0.22
   1   0  -6  304.99   14.21
   1   0  -5    0.06    0.15
  -1   0   4 2552.63  115.40
   1   0  -4 2550.48  115.61
  -1   0   3    0.08    0.04
   1   0  -3   -0.02    0.10
   1   0  -2 3042.73  137.64
  -1   0   1    0.05    0.03
  -1   0   1    0.01    0.02
  -1   0   0   99.91    4.56
   1   0   0   98.51    4.55
  -1   0  -1    0.04    0.03
  -1   0  -2 3823.84  170.80
   1   0   2 3740.91  170.75
  -1   0  -3    0.02    0.14
  -1   0  -3    0.04    0.05
   1   0   3    0.06    0.10
  -1   0  -4 2948.22  133.71
  -1   0  -4 2936.72  133.47
   1   0   4 3022.44  133.63
   1   0   5    0.07    0.12
  -1   0  -5    0.07    0.18
   1   0   6    4.18    0.41
  -1   0  -6    3.04    0.44
   1   0   7    0.21    0.18
  -1   0  -7    0.79    0.21
  -1   0  -7    0.15    0.23
   1   0   8  227.66   10.52
  -1   0  -8  213.51   10.69
  -1   0  -8  224.19   10.41
   1   0   9   -0.14    0.20
  -1   0  -9    0.07    0.29
  -1   0  -9   -0.07    0.18
   1   0  10  314.29   14.56
  -1   0 -10  316.81   14.42
  -1   0 -10  286.33   14.74
  -1   0 -11   -0.05    0.23
  -1   0 -11    0.19    0.36
   1   0  11    0.08    0.20
   1   0  11    0.25    0.27
  -1   0 -11   -0.12    0.26
  -1   0 -11    0.08    0.23
  -1   0 -12   86.16    4.97
   1   0  12   93.83    4.68
  -1   0 -12  100.53    4.76
  -1   0 -12   91.21    4.69
  -1   0 -12   90.30    4.75
   1   0  12   94.92    4.94
   1   0  13   -0.05    0.23
  -1   0 -13    0.05    0.26
  -1   0 -13    0.05    0.30
  -1   0 -13   -0.09    0.21
  -1   0 -13    0.06    0.28
   1   0  13   -0.15    0.32
   1   0  14   32.98    1.89
  -1   0 -14   29.07    1.89
  -1   0 -14   29.02    1.87
  -1   0 -14   28.17    1.94
   1   0  14   30.52    2.08
   1   0  15    0.34    0.30
   1   0  15    0.48    0.34
  -1   0 -15   -0.25    0.36
  -1   0 -15    0.06    0.34
  -1   0 -15   -0.73    0.38
  -1   0 -16  317.15   14.58
   1   0  16  304.95   14.36
   1   0  16  330.55   14.49
  -1   0 -16  287.96   14.56
  -1   0 -16  302.94   14.47
   1   0  17    0.25    0.20
   1   0  17    0.12    0.26
  -1   0 -17   -0.37    0.29
  -1   0 -17    0.10    0.31
  -1   0 -17    0.17    0.23
   1   0  18    0.97    0.21
   1   0  18    1.40    0.29
  -1   0 -18    0.39    0.24
  -1   0 -18    0.99    0.26
  -1   0 -18    0.58    0.30
  -1   0 -19    0.03    0.16
  -1   0 -19    0.18    0.14
  -1   0 -19    0.18    0.19
   1   0  19   -0.10    0.17
  -1   0 -19   -0.14    0.22
  -1   0 -20   -0.13    0.14
  -1   0 -20    0.02    0.10
   1  -1 -20    0.12    0.13
  -1   1  20    0.09    0.08
  -1  -1  20    0.03    0.11
  -1  -1  20    0.10    0.11
  -1   1  20    0.01    0.07
   1  -1 -19    0.06    0.19
   1   1 -19    0.02    0.12
   1  -1 -19   -0.03    0.15
   1   1 -19    0.06    0.14
  -1   1  19    0.02    0.14
  -1  -1  19    0.25    0.20
  -1  -1  19   -0.08    0.12
  -1   1  19    0.21    0.16
  -1   1  18    0.21    0.19
   1   1 -18    0.31    0.21
   1  -1 -18   -0.04    0.27
   1  -1 -18    0.16    0.19
   1   1 -18    0.04    0.20
  -1  -1  17    0.35    0.24
  -1   1  17    0.53    0.27
  -1   1  17   -0.04    0.22
   1  -1 -17    0.09    0.27
   1   1 -17    0.37    0.25
   1  -1 -17    0.30    0.32
   1  -1 -17    0.15    0.24
   1   1 -17    0.05    0.23
  -1   1  16    0.04    0.21
  -1   1  16    0.04    0.25
  -1  -1  16    0.22    0.27
   1   1 -16   -0.11    0.27
   1  -1 -16    0.06    0.27
   1  -1 -16    0.26    0.29
   1  -1 -16   -0.06    0.37
   1   1 -16    0.10    0.26
   1  -1 -15  115.86    5.87
   1   1 -15  117.06    5.80
  -1   1  15  123.41    5.77
  -1   1  15  125.54    5.73
  -1  -1  15  120.60    5.75
   1  -1 -15  107.32    6.37
   1  -1 -15  122.18    5.86
  -1   1  15  110.85    6.13
   1  -1 -15   94.24    5.70
   1  -1 -15  114.74    5.86
   1   1 -15  121.72    5.90
   1  -1 -14   97.33    4.84
   1   1 -14   94.71    4.78
  -1  -1  14   95.06    4.72
  -1   1  14   97.39    4.70
   1  -1 -14   83.17    5.29
   1  -1 -14   97.58    4.82
  -1  -1  14   84.49    5.08
   1  -1 -14   92.93    4.82
   1   1 -14   92.27    4.85
   1   1 -14   85.16    5.17
   1   1 -13  129.34    6.06
   1  -1 -13  122.94    6.07
  -1   1  13  121.81    5.94
  -1  -1  13  123.24    5.98
   1  -1 -13  117.92    6.62
   1  -1 -13  120.69    6.06
  -1  -1  13  120.80    5.86
  -1  -1  13  113.14    6.37
   1   1 -13  120.63    6.10
   1   1 -13  117.12    6.49
   1  -1 -13  120.99    6.10
   1  -1 -12   31.74    1.95
   1   1 -12   36.82    1.98
  -1  -1  12   33.24    1.89
  -1   1  12   30.43    1.84
   1  -1 -12   28.76    2.32
   1  -1 -12   31.54    1.94
  -1  -1  12   32.61    1.75
  -1  -1  12   31.79    1.79
   1  -1 -12   33.86    2.00
   1   1 -12   30.62    1.95
   1   1 -12   31.60    2.27
  -1  -1  12   30.93    2.21
   1  -1 -11   11.98    0.92
   1  -1 -11   10.49    0.88
  -1   1  11   11.01    0.84
  -1  -1  11   11.91    0.87
   1  -1 -11   11.00    1.22
   1  -1 -11   10.22    0.90
   1   1 -11   11.94    1.16
   1   1 -11   12.94    0.97
  -1   1  11   10.91    1.05
  -1  -1  11   13.17    1.06
  -1  -1  11   12.29    0.78
  -1  -1  11   10.96    0.79
   1   1 -10    9.20    0.97
   1  -1 -10    9.55    0.79
  -1   1  10   10.68    0.97
  -1  -1  10   11.04    0.92
   1  -1 -10    8.66    1.04
   1  -1  -9  790.25   38.10
   1   1  -9  825.54   38.01
  -1  -1   9  790.01   37.83
  -1   1   9  891.44   37.96
   1  -1  -9  837.52   38.17
   1   1  -8   29.92    1.78
   1  -1  -8   24.12    1.77
  -1   1   8   30.34    1.74
  -1  -1   8   26.12    1.64
   1  -1  -8   26.80    1.85
   1  -1  -7   11.27    0.69
   1  -1  -7   11.18    0.97
   1   1  -7   11.51    0.90
   1  -1  -7   11.98    1.01
   1  -1  -7   10.84    0.67
  -1   1   7   14.07    0.96
  -1  -1   7   11.77    0.85
   1  -1  -7   12.31    0.70
   1  -1  -6  102.80    5.16
   1  -1  -6  114.83    5.42
   1   1  -6  117.82    5.34
  -1  -1   6  102.38    5.15
   1  -1  -6  116.65    5.49
   1  -1  -6  109.75    5.13
  -1   1   6  117.31    5.33
  -1  -1   6  103.08    5.23
   1  -1  -6  109.74    5.17
   1  -1  -5   13.79    0.87
  -1  -1   5   15.97    0.85
   1   1  -5   14.90    0.92
   1  -1  -5   13.40    0.96
  -1  -1   5   12.63    0.86
   1  -1  -5   14.59    1.04
  -1  -1   5   14.64    0.80
   1  -1  -5   13.20    0.84
  -1   1   5   14.64    0.94
   1  -1  -5   12.91    0.87
   1  -1  -4   53.48    2.74
  -1  -1   4   53.08    2.69
  -1  -1   4   56.93    2.82
   1  -1  -4   55.40    2.78
   1   1  -4   55.96    2.71
  -1  -1   4   52.52    2.73
  -1  -1   4   53.72    2.76
   1  -1  -4   60.68    2.89
   1  -1  -4   52.66    2.70
  -1  -1   4   55.37    2.66
  -1   1   4   54.66    2.74
  -1  -1   4   56.72    2.72
   1  -1  -4   52.62    2.74
  -1  -1   3 1099.99   50.02
  -1  -1   3 1095.10   49.95
   1  -1  -3 1086.88   50.00
   1   1  -3 1105.23   49.89
   1  -1  -3 1131.51   49.96
  -1  -1   3 1084.70   49.98
  -1  -1   3 1134.85   50.02
   1  -1  -3 1068.43   49.95
  -1  -1   3 1061.26   49.91
  -1   1   3 1132.38   49.95
   1  -1  -3 1114.80   50.01
  -1  -1   3 1098.43   49.97
   1  -1  -2  112.27    4.93
  -1  -1   2   96.43    5.00
   1  -1  -2  105.39    5.05
   1  -1  -2  108.85    4.95
  -1  -1   2  107.09    5.04
  -1  -1   2  100.91    4.97
   1  -1  -2  102.34    5.01
  -1  -1   2  100.84    5.02
   1  -1  -2  108.32    5.07
  -1  -1   2  105.37    5.05
  -1   1   2  110.18    4.97
   1  -1  -1   36.65    1.96
   1  -1  -1   37.22    2.09
   1  -1  -1   34.75    2.06
  -1  -1   1   39.73    2.13
   1  -1  -1   37.73    2.02
   1  -1  -1   40.49    2.08
   1  -1   0  336.88   15.01
  -1  -1   0  353.17   15.09
  -1  -1   0  334.02   14.87
  -1  -1   0  334.36   15.02
   1  -1   0  333.85   15.05
   1  -1   0  323.98   14.98
   1  -1   0  338.71   15.01
  -1   1   0  323.54   14.89
  -1  -1   0  313.92   14.85
  -1  -1  -1   72.49    3.58
  -1  -1  -1   71.88    3.54
  -1   1  -1   75.43    3.43
  -1  -1  -1   75.28    3.60
   1  -1   1   71.02    3.60
   1  -1   1   73.42    3.54
   1  -1   2    9.72    0.71
  -1  -1  -2   10.45    0.70
  -1  -1  -2   10.92    0.73
  -1  -1  -2   10.88    0.72
   1  -1   2    9.30    0.68
  -1  -1  -2   11.38    0.68
  -1  -1  -2   10.34    0.69
   1  -1   2    8.30    0.68
  -1  -1  -2   12.32    0.74
  -1  -1  -3 1321.35   61.08
   1  -1   3 1303.10   61.13
  -1   1  -3 1307.09   60.99
  -1  -1  -3 1467.67   61.15
  -1  -1  -3 1353.58   61.18
  -1  -1  -3 1432.45   61.16
  -1  -1  -3 1375.43   61.05
   1  -1   3 1316.52   61.09
   1   1   3 1348.70   61.15
  -1  -1  -3 1348.64   61.11
   1  -1   3 1291.03   61.13
  -1  -1  -4    1.16    0.20
   1  -1   4    1.82    0.27
  -1   1  -4    1.96    0.24
  -1  -1  -4    1.32    0.27
  -1  -1  -4    0.92    0.25
  -1  -1  -4    1.28    0.25
  -1  -1  -4    1.77    0.27
  -1  -1  -4    1.51    0.22
   1  -1   4    1.78    0.26
   1  -1   4    1.76    0.20
   1   1   4    1.43    0.29
   1  -1   4    2.50    0.30
   1  -1   5   16.20    1.04
  -1  -1  -5   18.91    1.21
  -1   1  -5   16.58    1.07
  -1  -1  -5   16.70    1.05
  -1  -1  -5   17.37    1.18
   1  -1   5   17.41    1.00
   1   1   5   17.79    1.16
   1  -1   5   14.90    1.00
   1  -1   5   15.89    1.04
   1  -1   6  587.84   26.71
  -1  -1  -6  613.94   26.98
   1  -1   6  581.62   26.72
   1   1   6  586.96   26.89
  -1   1  -6  600.66   26.84
  -1  -1  -6  582.26   26.97
   1  -1   6  583.81   26.69
   1  -1   6  568.73   26.65
   1  -1   7    0.70    0.15
  -1   1  -7    1.14    0.23
  -1   1  -7    1.55    0.31
  -1  -1  -7    1.26    0.33
   1  -1   7    1.20    0.17
   1  -1   7    1.35    0.17
   1  -1   7    1.12    0.24
   1  -1   8    1.20    0.25
  -1   1  -8    0.37    0.23
  -1  -1  -8    0.57    0.28
  -1  -1  -8    1.03    0.23
  -1   1  -8    0.47    0.20
  -1  -1  -9   89.09    4.72
  -1  -1  -9   95.34    4.41
  -1   1  -9   81.58    4.58
  -1   1  -9   85.63    4.38
   1  -1   9   88.40    4.44
  -1   1 -10    3.29    0.44
  -1  -1 -10    2.65    0.42
  -1   1 -10    1.74    0.45
  -1  -1 -10    3.72    0.63
   1  -1  10    2.47    0.42
  -1  -1 -11    3.79    0.67
  -1  -1 -11    4.72    0.55
  -1   1 -11    4.10    0.51
   1  -1  11    4.04    0.48
   1   1  11    4.30    0.50
   1  -1  11    3.92    0.41
   1  -1  11    3.54    0.38
  -1  -1 -11    4.61    0.53
  -1  -1 -11    4.18    0.51
  -1   1 -11    3.51    0.44
   1  -1  11    3.14    0.48
   1   1  11    5.34    0.71
   1  -1  12   71.09    3.68
   1   1  12   72.49    3.68
  -1  -1 -12   69.13    3.75
  -1   1 -12   73.30    3.78
  -1  -1 -12   70.10    4.14
   1  -1  12   70.99    3.56
   1  -1  12   68.90    3.49
   1  -1  12   66.68    3.79
   1   1  12   77.25    4.07
  -1   1 -12   73.48    3.65
  -1  -1 -12   71.07    3.74
  -1   1 -13   23.02    1.46
  -1   1 -13   19.28    1.31
   1  -1  13   20.27    1.36
   1   1  13   21.52    1.35
  -1  -1 -13   18.31    1.40
  -1   1 -13   17.92    1.39
  -1  -1 -13   21.90    1.78
   1  -1  13   18.79    1.22
  -1  -1 -13   20.52    1.42
   1   1  13   21.08    1.63
  -1   1 -14   76.44    4.13
  -1   1 -14   87.83    4.29
   1  -1  14   85.11    4.20
   1   1  14   85.01    4.17
  -1  -1 -14   78.35    4.28
  -1   1 -14   80.89    4.28
  -1  -1 -14   71.77    4.61
  -1  -1 -14   82.80    4.29
   1   1  14   82.79    4.56
   1  -1  14   81.39    4.04
  -1   1 -15   14.33    1.10
  -1   1 -15   12.18    0.97
   1  -1  15   12.34    1.31
  -1   1 -15   13.49    1.10
  -1  -1 -15   14.06    1.12
   1   1  15   13.54    1.01
   1  -1  15   12.92    1.00
   1  -1  15   12.51    0.88
  -1  -1 -15   11.83    1.06
   1   1  15   12.68    1.22
   1  -1  16   33.07    1.89
   1   1  16   34.73    1.90
   1   1  16   33.32    1.86
  -1  -1 -16   30.73    1.95
  -1   1 -16   30.69    1.94
  -1   1 -16   26.38    1.76
  -1  -1 -16   32.74    1.96
  -1   1 -16   33.91    1.95
  -1  -1 -17    2.54    0.49
  -1   1 -17    2.34    0.41
  -1  -1 -17    1.68    0.38
   1   1  17    3.08    0.41
   1   1  17    1.86    0.34
   1  -1  17    2.66    0.40
  -1   1 -17    2.03    0.40
  -1  -1 -17    2.88    0.46
   1  -1  18    4.31    0.45
   1   1  18    4.15    0.42
  -1  -1 -18    3.90    0.47
  -1   1 -18    4.37    0.47
  -1  -1 -18    4.01    0.54
  -1  -1 -18    4.39    0.49
   1   1  18    4.91    0.46
  -1   1 -18    4.41    0.48
  -1  -1 -18    4.16    0.51
  -1  -1 -19   13.47    0.91
   1   1  19   14.33    0.81
  -1  -1 -19   12.83    0.87
  -1   1 -19   11.10    0.79
  -1  -1 -19   13.24    0.85
   1   1  20    0.51    0.10
  -1  -1 -20    0.49    0.14
  -1  -1 -20    0.25    0.12
   1  -1  20    0.34    0.12
   1   1  20    0.47    0.09
  -1   2  19    3.47    0.32
  -1  -2  19    3.76    0.31
  -1  -2  19    3.63    0.31
  -1   2  19    4.01    0.33
  -1  -2  19    4.11    0.35
  -1   2  18   45.31    2.12
   1  -2 -18   42.80    2.28
  -1  -2  18   45.31    2.13
  -1   2  18   45.62    2.13
  -1  -2  18   40.61    2.15
  -1   2  17   10.87    0.79
   1  -2 -17   11.24    0.96
  -1  -2  17   11.28    0.85
  -1  -2  17    9.82    0.80
   1   2 -16    3.78    0.43
   1  -2 -16    3.75    0.45
   1  -2 -16    3.44    0.51
   1  -2 -16    4.55    0.66
  -1  -2  16    3.52    0.50
  -1  -2  16    3.80    0.48
  -1   2  16    3.99    0.48
   1  -2 -15   13.71    1.07
   1  -2 -15   12.41    1.05
  -1   2  15   15.64    1.03
   1  -2 -15   12.38    1.01
   1  -2 -15   14.87    1.23
  -1  -2  15   13.57    0.94
   1   2 -15   12.04    0.96
   1  -2 -15   13.04    1.00
   1  -2 -14   10.47    0.96
   1  -2 -14   12.57    1.16
  -1   2  14   12.27    1.20
  -1  -2  14   10.86    0.75
  -1  -2  14   12.87    0.90
   1  -2 -14   10.89    1.37
   1  -2 -14   13.05    1.03
   1  -2 -14   12.65    1.01
  -1  -2  14   11.75    1.26
   1   2 -14   11.09    0.89
   1  -2 -14   10.12    0.91
  -1  -2  14   11.20    0.86
  -1   2  14   11.71    0.92
  -1   2  14    9.57    0.76
   1  -2 -13   93.30    4.72
   1   2 -13   86.98    4.64
  -1  -2  13   92.17    4.51
   1  -2 -13   91.28    4.82
  -1   2  13  104.80    5.17
  -1  -2  13   98.78    4.57
  -1  -2  13   98.50    4.63
   1  -2 -13   99.04    5.02
   1  -2 -13   91.48    4.74
   1  -2 -13   91.78    4.74
  -1  -2  13   80.87    4.56
  -1   2  13   98.47    4.68
  -1  -2  13   85.52    5.19
   1  -2 -13   83.64    5.40
   1  -2 -12    0.37    0.38
  -1  -2  12    0.69    0.25
   1  -2 -12    0.37    0.27
   1  -2 -12   -0.05    0.33
  -1   2  12    0.09    0.32
  -1  -2  12    0.13    0.18
   1  -2 -12    0.38    0.29
  -1  -2  12    0.72    0.27
  -1  -2  12    0.59    0.26
   1  -2 -12    0.65    0.49
   1   2 -12    0.75    0.27
   1  -2 -12    0.29    0.24
  -1  -2  12    0.11    0.35
  -1   2  11   51.63    3.02
  -1  -2  11   47.32    2.53
   1  -2 -11   42.84    2.83
   1  -2 -11   48.81    3.31
   1  -2 -11   45.34    2.66
  -1  -2  11   49.43    3.17
   1  -2 -11   44.99    2.78
  -1  -2  11   55.26    2.56
  -1  -2  11   49.71    2.59
   1   2 -11   46.81    2.59
   1  -2 -11   48.53    2.64
  -1  -2  11   48.70    2.56
  -1   2  10  214.08    9.65
  -1  -2  10  174.19    9.10
   1  -2 -10  206.85    9.51
   1  -2 -10  195.29    9.97
   1  -2 -10  184.26    9.23
  -1  -2  10  202.25    9.84
   1  -2 -10  188.81    9.42
  -1  -2  10  213.58    9.13
  -1  -2  10  206.35    9.18
   1   2 -10  188.92    9.15
   1  -2 -10  185.27    9.70
   1  -2 -10  194.45    9.21
  -1  -2  10  187.12    9.11
   1  -2  -9    0.17    0.28
   1  -2  -9    0.14    0.17
   1  -2  -9    0.42    0.39
  -1  -2   9    0.29    0.16
  -1  -2   9   -0.37    0.34
   1  -2  -9    0.11    0.26
  -1   2   9    0.07    0.25
   1  -2  -9   -0.04    0.20
   1  -2  -9    0.12    0.25
  -1  -2   9    0.32    0.18
   1  -2  -8   57.99    3.43
   1  -2  -8   51.75    3.13
   1  -2  -8   54.64    2.77
  -1   2   8   60.99    3.14
   1  -2  -8   53.49    2.90
  -1  -2   8   55.84    3.28
   1  -2  -8   50.32    2.85
   1  -2  -7  112.92    5.61
  -1  -2   7  107.08    5.83
  -1  -2   7  117.18    5.52
   1  -2  -7  112.67    5.58
   1  -2  -7  116.49    5.98
   1  -2  -7  107.74    5.70
   1  -2  -7  110.85    5.50
  -1  -2   7  107.63    5.23
  -1  -2   7  117.76    5.44
  -1   2   7  122.13    5.71
   1  -2  -6   14.75    1.11
   1  -2  -6   13.34    0.83
   1  -2  -6   14.82    1.29
  -1  -2   6   14.60    0.81
   1  -2  -6   12.99    0.83
  -1   2   6   14.74    1.10
   1  -2  -6   15.99    1.13
   1  -2  -6   14.15    1.04
  -1  -2   6   15.19    0.99
   1  -2  -6   12.41    1.04
  -1  -2   6   14.88    1.23
  -1  -2   6   15.51    1.06
   1  -2  -5   92.48    4.59
  -1  -2   5   94.90    4.56
  -1  -2   5   92.85    4.21
   1  -2  -5   85.67    4.22
   1  -2  -5   81.89    4.21
  -1  -2   5   86.73    4.18
  -1   2   5   87.65    4.46
   1  -2  -5   89.24    4.44
   1  -2  -5   87.57    4.48
  -1  -2   5   92.56    4.43
  -1  -2   5   89.38    4.58
   1  -2  -5   88.81    4.56
  -1  -2   5   88.17    4.49
  -1  -2   5   94.54    4.69
   1  -2  -4   91.87    4.68
  -1  -2   4  101.16    4.69
   1  -2  -4   88.37    4.33
  -1  -2   4   92.62    4.30
  -1  -2   4   89.52    4.38
  -1  -2   4   87.12    4.28
   1  -2  -4   84.25    4.31
  -1   2   4   94.34    4.53
   1  -2  -4   89.84    4.45
  -1  -2   4   95.92    4.55
   1  -2  -4   93.15    4.61
  -1  -2   4   92.52    4.71
  -1  -2   4   93.52    4.62
   1  -2  -4   95.81    4.69
  -1  -2   4   88.93    4.65
  -1  -2   3   98.08    4.70
   1  -2  -3   98.60    4.75
  -1  -2   3   94.33    4.32
   1  -2  -3   86.34    4.34
  -1  -2   3   88.87    4.30
   1  -2  -3   83.58    4.32
  -1  -2   3   86.93    4.38
  -1  -2   3   93.18    4.69
  -1  -2   3   93.01    4.56
   1  -2  -3   91.95    4.62
   1  -2  -3   95.94    4.60
  -1   2   3   92.13    4.48
   1  -2  -3  100.33    4.74
  -1  -2   3   94.57    4.65
  -1  -2   2   25.81    1.62
   1  -2  -2   26.37    1.68
  -1  -2   2   23.50    1.32
  -1  -2   2   22.84    1.38
   1  -2  -2   24.82    1.63
  -1  -2   2   24.50    1.54
   1  -2  -2   24.59    1.58
  -1   2   2   26.23    1.45
   1  -2  -2   27.57    1.54
   1  -2  -2   25.16    1.64
  -1  -2   2   26.13    1.61
   1  -2  -2   26.57    1.49
  -1  -2   2   24.25    1.62
  -1  -2   1  138.72    5.74
   1  -2  -1  141.07    5.58
  -1   2   1  127.52    5.42
   1  -2  -1  135.88    5.54
   1  -2  -1  129.51    5.67
  -1  -2   1  138.09    5.77
  -1   2   0   93.10    4.68
   1  -2   0   98.74    4.80
   1  -2   0   95.92    4.94
  -1  -2   0   97.85    4.89
  -1  -2   0   99.83    4.91
  -1  -2   0  100.47    4.99
   1  -2   0   99.18    5.02
   1  -2   0  103.10    4.89
  -1  -2   0   98.21    5.00
   1  -2   0  101.62    5.06
  -1  -2   0  101.37    5.01
  -1  -2  -1   72.77    3.70
  -1  -2  -1   81.17    3.98
  -1  -2  -1   83.33    4.01
   1  -2   1   82.64    4.13
   1  -2   1   76.59    3.97
  -1  -2  -1   79.58    4.08
   1  -2   1   82.47    4.15
  -1  -2  -2    0.05    0.28
   1  -2   2    0.23    0.26
  -1  -2  -2    0.26    0.16
   1  -2   2    0.02    0.16
  -1  -2  -2    0.13    0.15
  -1  -2  -2    0.21    0.31
   1  -2   2    0.06    0.16
  -1  -2  -2    0.29    0.25
  -1  -2  -2    0.10    0.09
   1  -2   2    0.19    0.30
   1   2   2    0.04    0.19
  -1  -2  -2    0.24    0.13
  -1  -2  -2    0.25    0.24
   1  -2   2   -0.06    0.27
   1  -2   2    0.24    0.23
  -1  -2  -3   61.01    3.16
   1  -2   3   60.32    3.21
  -1  -2  -3   57.65    2.81
   1  -2   3   55.97    2.82
  -1  -2  -3   53.90    2.79
  -1  -2  -3   64.92    2.92
   1  -2   3   54.06    2.81
   1   2   3   56.08    3.05
  -1  -2  -3   58.61    3.20
  -1  -2  -3   59.54    3.04
   1  -2   3   55.30    3.07
  -1  -2  -3   60.39    3.17
   1  -2   3   59.18    3.18
  -1  -2  -3   58.62    3.10
   1  -2   3   59.55    3.15
  -1  -2  -4   21.42    1.48
   1  -2   4   21.41    1.52
  -1  -2  -4   23.98    1.24
   1  -2   4   20.88    1.23
   1  -2   4   22.73    1.25
  -1  -2  -4   26.40    1.34
   1  -2   4   20.99    1.24
  -1  -2  -4   22.68    1.22
   1   2   4   22.85    1.51
  -1  -2  -4   24.36    1.65
  -1  -2  -4   24.76    1.45
   1  -2   4   23.46    1.49
  -1  -2  -4   23.26    1.49
   1  -2   4   20.77    1.54
   1  -2   4   23.30    1.55
  -1  -2  -4   26.06    1.59
   1  -2   5  210.42    9.87
  -1  -2  -5  226.37    9.85
  -1  -2  -5  207.79    9.76
   1  -2   5  216.14    9.87
   1   2   5  205.38    9.83
   1  -2   5  202.11    9.74
  -1  -2  -5  214.34    9.69
   1  -2   5  195.58    9.47
  -1  -2  -5  211.51   10.00
  -1  -2  -5  224.22    9.89
  -1  -2  -5  200.50    9.44
   1  -2   5  194.09    9.47
   1  -2   6   15.89    1.25
  -1  -2  -6   22.05    1.28
   1  -2   6   18.64    1.28
   1  -2   6   17.09    1.01
  -1  -2  -6   20.84    1.53
   1   2   6   18.63    1.35
  -1  -2  -6   19.60    1.19
   1  -2   6   16.61    1.19
   1  -2   6   17.03    1.01
  -1  -2  -6   18.94    0.99
   1   2   7   38.52    2.36
  -1  -2  -7   38.47    2.03
  -1  -2  -7   40.89    2.56
   1  -2   7   38.94    2.21
   1  -2   7   41.31    2.55
   1  -2   7   38.13    2.15
  -1  -2  -7   40.77    2.11
   1  -2   7   35.77    2.20
   1   2   8   12.98    1.11
   1  -2   8   14.06    1.28
   1  -2   8   10.91    0.81
  -1  -2  -8   11.36    1.20
  -1  -2  -8   11.84    0.83
   1   2   9    0.37    0.36
   1  -2   9    0.30    0.32
  -1  -2  -9    0.24    0.19
  -1  -2  -9    0.16    0.22
   1  -2   9    0.18    0.18
  -1  -2  -9    0.50    0.37
  -1  -2  -9    0.22    0.18
   1  -2   9    0.42    0.20
   1  -2  10  105.30    5.21
   1  -2  10  113.64    5.19
   1  -2  10  101.01    5.21
  -1   2 -10   98.78    5.18
  -1  -2 -10  109.92    5.27
  -1  -2 -10  107.06    5.91
  -1  -2 -10   95.69    5.32
  -1  -2 -10  109.93    5.29
  -1  -2 -10  103.99    5.30
  -1  -2 -10  108.19    5.30
   1  -2  10  114.82    5.22
   1   2  10  111.30    5.69
   1  -2  10  120.34    6.04
   1  -2  11   97.08    4.39
   1  -2  11   91.75    4.45
   1  -2  11   83.15    4.39
   1   2  11   96.65    4.96
  -1  -2 -11   85.68    5.10
  -1  -2 -11   81.57    4.53
  -1  -2 -11   91.32    4.79
  -1  -2 -11   84.62    4.52
  -1  -2 -11   87.98    4.52
  -1   2 -11   83.24    4.41
  -1  -2 -11   89.54    4.49
   1  -2  11   91.25    4.43
   1  -2  11  105.90    5.32
   1  -2  12   32.58    1.67
   1  -2  12   29.94    1.72
   1  -2  12   24.99    1.62
   1   2  12   31.20    2.13
  -1  -2 -12   28.38    2.28
   1  -2  12   30.96    2.36
  -1  -2 -12   30.00    1.82
  -1  -2 -12   28.97    1.77
  -1   2 -12   26.38    1.68
   1  -2  12   28.28    1.70
  -1  -2 -12   30.22    2.04
   1  -2  13   10.75    0.79
   1  -2  13    8.59    0.70
   1  -2  13    8.13    0.68
   1   2  13   10.13    1.09
   1  -2  13    8.75    1.14
  -1   2 -13    9.60    0.83
  -1  -2 -13    9.81    0.87
   1  -2  13    8.52    0.74
   1   2  13    7.91    0.68
  -1   2 -13    7.66    0.73
  -1  -2 -13   10.22    0.85
  -1  -2 -13    9.56    1.23
  -1  -2 -13    9.83    1.04
  -1   2 -14    8.86    0.79
  -1  -2 -14    9.48    0.86
   1  -2  14   10.40    1.20
   1   2  14    7.78    0.67
   1  -2  14    8.34    0.73
   1  -2  14   10.22    0.77
   1  -2  14    9.25    0.69
   1  -2  14    9.60    0.66
  -1   2 -14    9.66    0.77
  -1  -2 -14    7.41    0.75
  -1  -2 -14    8.20    0.97
  -1  -2 -15    4.53    0.57
  -1   2 -15    3.72    0.50
   1   2  15    3.98    0.41
   1  -2  15    4.21    0.48
  -1  -2 -15    4.61    0.68
  -1   2 -15    3.92    0.47
  -1  -2 -15    4.34    0.52
   1  -2  15    5.71    0.53
  -1  -2 -15    5.77    0.64
  -1   2 -16    9.29    0.77
  -1  -2 -16   11.34    0.90
   1  -2  16   12.33    0.92
  -1  -2 -16   12.05    0.93
  -1  -2 -16   11.66    1.01
  -1  -2 -16   10.65    0.82
   1   2  16    9.65    0.70
   1   2  16   12.27    0.87
   1  -2  16   11.42    0.78
   1  -2  17    1.35    0.31
  -1  -2 -17    1.29    0.35
  -1  -2 -17    1.45    0.32
  -1   2 -17    1.35    0.22
   1  -2  17    1.33    0.25
   1   2  17    1.84    0.30
  -1  -2 -18   10.36    0.80
   1   2  18   10.99    0.72
  -1  -2 -18    9.59    0.73
   1  -2  18   11.75    0.74
   1  -2  18   11.85    0.76
   1  -2  19    0.28    0.12
   1  -2  19    0.12    0.10
   1   2  19    0.29    0.11
  -1  -2 -19    0.15    0.12
  -1  -2 -19    0.26    0.11
   1   2  19    0.26    0.11
  -1  -3  18    5.06    0.33
  -1  -3  18    4.97    0.32
   1  -3 -18    4.22    0.35
   1  -3 -17   21.87    1.21
  -1   3  17   21.77    1.17
  -1  -3  17   24.75    1.27
   1  -3 -17   21.81    1.33
   1  -3 -17   21.21    1.19
  -1   3  17   22.64    1.18
  -1  -3  17   24.77    1.25
   1  -3 -16    3.20    0.37
  -1   3  16    3.09    0.32
  -1  -3  16    2.83    0.36
  -1  -3  16    3.78    0.42
  -1   3  16    3.03    0.33
   1  -3 -16    2.85    0.45
   1  -3 -16    2.97    0.36
  -1  -3  16    3.15    0.34
  -1  -3  15    2.14    0.32
  -1   3  15    2.69    0.33
   1  -3 -15    2.21    0.46
   1  -3 -15    2.20    0.35
  -1   3  15    2.07    0.29
  -1  -3  15    2.12    0.36
  -1  -3  15    1.71    0.37
   1  -3 -15    1.94    0.35
  -1  -3  15    2.07    0.25
  -1  -3  14   17.14    1.01
  -1  -3  14   15.42    0.95
   1  -3 -14   15.77    1.27
   1  -3 -14   12.52    1.06
  -1  -3  14   15.71    1.13
   1  -3 -14   16.63    1.10
  -1   3  14   14.50    0.98
  -1   3  13    6.52    0.57
   1  -3 -13    6.32    0.64
   1  -3 -13    5.61    0.69
  -1  -3  13    5.89    0.54
  -1  -3  13    6.60    0.58
   1  -3 -13    5.28    0.75
  -1  -3  13    6.06    0.68
   1  -3 -12    2.57    0.52
  -1  -3  12    3.45    0.43
  -1  -3  12    2.69    0.41
   1  -3 -12    3.06    0.59
   1  -3 -12    3.73    0.46
   1  -3 -12    3.39    0.49
  -1   3  12    3.14    0.40
  -1  -3  12    2.82    0.68
  -1   3  12    3.34    0.60
  -1  -3  12    3.58    0.54
   1  -3 -12    3.63    0.76
  -1  -3  11   18.43    1.32
  -1  -3  11   18.94    1.37
   1  -3 -11   19.71    1.28
   1  -3 -11   18.18    1.29
  -1   3  11   16.45    1.15
  -1  -3  11   16.41    1.66
   1  -3 -11   20.53    1.68
  -1   3  11   17.80    1.50
  -1  -3  11   19.04    1.23
  -1  -3  11   19.35    1.21
  -1  -3  11   18.67    1.21
   1  -3 -11   18.60    1.46
   1  -3 -11   18.96    1.51
   1  -3 -11   18.21    1.84
   1  -3 -10    7.85    0.91
   1  -3 -10    8.41    0.94
  -1  -3  10    8.58    0.74
  -1  -3  10    8.49    0.74
  -1  -3  10   10.72    0.78
  -1  -3  10    9.86    0.86
   1  -3 -10    7.27    0.73
  -1  -3  10    9.95    0.88
   1  -3 -10    9.57    0.83
   1  -3 -10    7.76    0.76
  -1  -3  10    7.80    1.11
   1  -3 -10    9.07    1.04
  -1   3  10   10.31    1.04
  -1   3  10    8.72    0.71
   1  -3 -10    6.86    1.13
   1  -3  -9    0.67    0.43
   1  -3  -9    0.50    0.33
  -1  -3   9    0.12    0.21
  -1  -3   9    0.58    0.22
   1  -3  -9    0.58    0.38
   1  -3  -9   -0.10    0.27
   1  -3  -9    0.42    0.24
  -1  -3   9    0.12    0.42
   1  -3  -9    0.10    0.26
  -1   3   9    0.08    0.27
  -1   3   9    0.22    0.16
   1  -3  -9    0.64    0.26
  -1  -3   9    0.16    0.25
  -1  -3   9    0.53    0.23
  -1  -3   9    0.25    0.25
   1  -3  -8    3.50    0.60
  -1   3   8    2.31    0.50
  -1  -3   8    2.00    0.34
  -1  -3   8    2.20    0.36
   1  -3  -8    2.94    0.55
   1  -3  -8    2.16    0.53
   1  -3  -8    2.22    0.43
  -1  -3   8    2.06    0.35
   1  -3  -8    1.66    0.37
  -1  -3   8    2.80    0.44
  -1  -3   8    2.70    0.39
   1  -3  -8    1.49    0.38
  -1  -3   8    2.27    0.42
   1  -3  -8    3.19    0.71
  -1  -3   8    2.42    0.61
   1  -3  -8    2.77    0.49
   1  -3  -7    8.93    0.98
  -1   3   7    9.19    0.91
  -1  -3   7    8.45    0.76
  -1  -3   7    8.23    0.72
  -1  -3   7    8.01    1.06
   1  -3  -7    8.28    0.67
   1  -3  -7    7.47    0.88
  -1  -3   7    8.58    0.88
  -1  -3   7    8.93    0.63
   1  -3  -7    8.94    0.90
  -1  -3   7    9.50    0.84
  -1  -3   7    9.31    0.71
  -1  -3   7    9.39    0.71
   1  -3  -7    9.13    0.66
   1  -3  -7    9.55    0.94
   1  -3  -7    8.65    0.95
   1  -3  -7    8.23    0.68
   1  -3  -7    7.46    0.91
   1  -3  -7    9.33    0.82
   1  -3  -7    8.71    0.77
  -1  -3   7    8.25    0.73
   1  -3  -7    8.67    0.82
  -1  -3   7    8.49    0.81
  -1  -3   7   10.38    0.77
   1  -3  -7    9.06    0.68
   1  -3  -6    1.77    0.42
  -1   3   6    0.50    0.27
  -1  -3   6    1.60    0.41
  -1  -3   6    1.40    0.27
   1  -3  -6    1.46    0.41
   1  -3  -6    1.05    0.26
   1  -3  -6    0.83    0.25
  -1  -3   6    1.61    0.28
  -1  -3   6    0.95    0.33
   1  -3  -6    1.50    0.43
  -1  -3   6    1.50    0.26
  -1  -3   6    1.23    0.27
   1  -3  -6    1.10    0.38
  -1  -3   6    0.90    0.31
   1  -3  -6    1.89    0.48
  -1  -3   6    1.85    0.30
   1  -3  -6    1.07    0.37
   1  -3  -6    0.82    0.24
   1  -3  -6    0.95    0.36
   1  -3  -6    1.20    0.36
   1  -3  -6    1.04    0.27
  -1  -3   6    0.89    0.31
   1  -3  -6    0.64    0.24
  -1  -3   6    1.34    0.31
  -1  -3   6    1.02    0.29
   1  -3  -6    1.29    0.34
  -1  -3   6    1.11    0.30
  -1  -3   5   38.63    2.04
   1  -3  -5   39.59    2.09
  -1  -3   5   38.97    2.12
  -1  -3   5   39.37    2.16
   1  -3  -5   35.15    2.11
  -1  -3   5   38.12    2.46
   1  -3  -5   38.26    2.54
  -1  -3   5   36.41    2.08
  -1  -3   5   42.40    2.41
   1  -3  -5   41.07    2.47
  -1  -3   5   36.40    2.03
  -1  -3   5   35.66    2.07
   1  -3  -5   38.68    2.36
  -1  -3   5   42.27    2.25
  -1  -3   5   49.96    2.38
   1  -3  -5   39.02    2.35
   1  -3  -5   41.43    2.60
   1  -3  -5   36.44    2.13
  -1  -3   5   34.53    2.08
   1  -3  -5   44.32    2.27
   1  -3  -5   40.75    2.23
  -1  -3   5   40.20    2.20
  -1  -3   5   38.96    2.16
   1  -3  -5   31.90    2.21
  -1  -3   5   38.22    2.18
   1  -3  -5   45.57    2.27
  -1   3   5   41.21    2.33
   1  -3  -5   35.92    2.38
   1  -3  -5   39.65    2.10
  -1  -3   4  113.07    5.44
   1  -3  -4  114.78    5.49
  -1  -3   4  108.57    5.48
  -1  -3   4  106.14    5.49
   1  -3  -4  104.40    5.53
   1  -3  -4  122.66    6.09
  -1  -3   4  115.98    5.94
  -1  -3   4  122.23    5.65
   1  -3  -4  118.69    5.76
  -1  -3   4  131.12    5.73
  -1  -3   4  107.21    5.46
  -1  -3   4  106.07    5.50
  -1  -3   4  122.29    6.07
   1  -3  -4  113.04    6.07
   1  -3  -4  102.85    5.53
   1  -3  -4  110.61    5.59
   1  -3  -4  130.12    5.66
   1  -3  -4  107.33    5.60
   1  -3  -4  102.87    5.63
  -1  -3   4  109.53    5.55
  -1  -3   4  113.60    5.57
   1  -3  -4  131.06    5.67
  -1  -3   4  133.04    5.76
  -1  -3   4  114.05    5.59
   1  -3  -4  113.37    5.92
  -1  -3   4  121.04    5.85
   1  -3  -4  107.03    5.78
  -1   3   4  110.23    5.66
   1  -3  -4  119.24    5.52
   1  -3  -3  166.03    8.19
  -1  -3   3  172.62    8.16
   1  -3  -3  177.76    8.80
  -1  -3   3  176.19    8.79
  -1  -3   3  177.94    8.71
  -1  -3   3  191.44    8.84
   1  -3  -3  176.65    8.83
   1  -3  -3  164.40    8.29
  -1  -3   3  161.35    8.26
  -1  -3   3  195.06    8.44
  -1   3   3  159.59    8.30
   1  -3  -3  163.22    8.42
   1  -3  -3  161.75    8.41
  -1  -3   3  176.91    8.34
  -1  -3   3  179.87    8.39
   1  -3  -3  179.34    8.24
  -1  -3   3  186.64    8.21
  -1  -3   3  181.11    8.59
   1  -3  -3  175.17    8.66
   1  -3  -2   55.63    2.90
  -1  -3   2   61.34    2.90
  -1  -3   2   58.05    3.36
   1  -3  -2   57.29    3.42
  -1  -3   2   62.76    3.40
   1  -3  -2   53.31    2.88
  -1  -3   2   56.96    2.86
   1  -3  -2   54.41    3.04
  -1   3   2   49.32    2.92
  -1  -3   2   58.19    3.38
   1  -3  -2   60.16    3.48
  -1  -3   2   57.52    3.23
   1  -3  -2   52.82    3.26
  -1  -3   1    3.41    0.61
  -1  -3   1    3.57    0.61
   1  -3  -1    3.33    0.53
   1  -3  -1    2.57    0.38
  -1  -3   1    2.51    0.57
   1  -3  -1    2.33    0.54
   1  -3  -1    2.88    0.40
   1  -3   0   56.29    2.96
  -1  -3   0   60.53    2.96
  -1  -3   0   60.68    3.40
   1  -3   0   57.94    3.30
  -1  -3   0   56.15    3.37
   1  -3   0   56.13    3.46
  -1  -3   0   58.94    2.93
   1  -3   0   57.59    2.96
   1   3   0   48.50    3.05
  -1  -3   0   63.73    3.52
   1  -3   0   61.40    3.57
  -1  -3   0   57.52    3.30
   1  -3   0   58.36    3.38
  -1  -3  -1    2.13    0.34
   1  -3   1    2.98    0.54
   1  -3   1    2.47    0.59
   1   3   1    2.60    0.42
   1  -3   1    2.28    0.58
  -1  -3  -1    3.03    0.55
  -1  -3  -1    2.40    0.35
  -1  -3  -2    0.03    0.19
   1  -3   2    0.24    0.20
   1   3   2   -0.18    0.24
   1  -3   2    0.24    0.28
   1  -3   2   -0.18    0.33
  -1  -3  -2   -0.08    0.26
   1  -3   2    0.31    0.19
   1  -3   2   -0.13    0.21
  -1  -3  -2   -0.06    0.21
   1  -3   2   -0.08    0.33
  -1  -3  -2   -0.07    0.31
   1  -3   2   -0.09    0.27
  -1  -3  -2    0.17    0.28
   1  -3   3    0.82    0.26
  -1  -3  -3    1.07    0.37
   1  -3   3    0.75    0.43
  -1  -3  -3    0.47    0.23
   1  -3   3    0.65    0.22
  -1  -3  -3    0.95    0.35
   1  -3   3    0.72    0.34
   1  -3   3    1.18    0.38
  -1  -3  -3    0.42    0.27
  -1  -3  -3    0.55    0.27
  -1  -3  -3    1.11    0.41
   1  -3   3    1.03    0.41
  -1  -3  -3    1.32    0.33
   1   3   3    1.39    0.36
  -1  -3  -3    0.92    0.28
   1  -3   3    0.54    0.29
   1  -3   3    0.64    0.22
   1  -3   3    1.04    0.27
  -1  -3  -3    1.07    0.26
   1  -3   4    2.13    0.32
   1  -3   4    1.50    0.29
  -1  -3  -4    1.60    0.34
   1  -3   4    2.37    0.52
   1  -3   4    2.36    0.52
  -1  -3  -4    2.32    0.49
   1  -3   4    2.14    0.33
  -1  -3  -4    2.05    0.33
  -1  -3  -4    1.87    0.30
  -1  -3  -4    2.78    0.52
   1  -3   4    2.71    0.52
   1  -3   4    1.82    0.30
   1  -3   4    2.44    0.35
   1  -3   4    2.20    0.37
  -1  -3  -4    2.32    0.42
  -1  -3  -4    2.65    0.35
   1  -3   4    1.66    0.32
   1  -3   4    2.38    0.53
  -1  -3  -4    2.27    0.46
   1  -3   4    3.11    0.44
  -1  -3  -4    2.77    0.40
  -1  -3  -4    1.12    0.31
   1  -3   4    2.33    0.38
  -1  -3  -4    1.82    0.37
   1  -3   4    2.76    0.46
   1  -3   4    2.25    0.41
   1   3   4    2.05    0.45
   1  -3   4    2.48    0.34
   1  -3   5    3.83    0.40
   1  -3   5    3.31    0.40
  -1  -3  -5    3.65    0.38
  -1  -3  -5    3.09    0.47
   1  -3   5    2.43    0.38
  -1  -3  -5    3.10    0.51
   1  -3   5    2.58    0.42
  -1  -3  -5    2.57    0.36
   1  -3   5    2.69    0.58
   1  -3   5    4.53    0.75
   1  -3   5    2.66    0.38
  -1  -3  -5    2.92    0.54
  -1  -3  -5    3.86    0.55
   1  -3   5    3.52    0.57
   1  -3   5    3.92    0.64
   1  -3   5    2.61    0.40
  -1  -3  -5    2.98    0.38
  -1  -3  -5    3.01    0.52
  -1  -3  -5    3.45    0.48
  -1  -3  -5    2.19    0.42
   1  -3   5    3.57    0.43
   1  -3   5    3.02    0.38
  -1  -3  -5    2.31    0.40
   1  -3   5    2.70    0.39
   1  -3   5    3.36    0.46
  -1  -3  -5    3.87    0.46
   1   3   5    3.89    0.59
   1  -3   5    3.39    0.41
   1  -3   6    0.32    0.19
  -1  -3  -6    1.11    0.31
  -1  -3  -6    0.89    0.31
   1  -3   6    0.40    0.27
  -1  -3  -6    0.65    0.20
   1  -3   6    0.61    0.21
   1  -3   6    0.32    0.18
   1  -3   6    0.64    0.30
   1  -3   6    0.53    0.38
  -1  -3  -6    0.56    0.20
  -1  -3  -6    0.43    0.29
   1  -3   6    0.54    0.25
  -1  -3  -6    0.12    0.25
   1  -3   6    0.56    0.22
  -1  -3  -6    0.52    0.30
  -1  -3  -6    0.95    0.23
   1  -3   6    0.68    0.36
  -1  -3  -6    0.52    0.26
  -1  -3  -6    0.23    0.27
   1  -3   6    1.17    0.29
   1  -3   6    0.71    0.23
   1  -3   6    0.67    0.23
  -1  -3  -6    0.26    0.21
  -1  -3  -6    0.85    0.30
   1   3   6    0.53    0.31
   1  -3   6    1.18    0.25
  -1  -3  -7    3.85    0.57
   1  -3   7    4.64    0.49
   1  -3   7    3.83    0.73
  -1  -3  -7    3.80    0.40
   1  -3   7    3.12    0.56
  -1  -3  -7    3.44    0.40
   1  -3   7    3.15    0.56
  -1  -3  -7    3.31    0.59
  -1  -3  -7    4.26    0.55
  -1  -3  -7    4.17    0.54
   1   3   7    4.26    0.68
   1  -3   7    3.55    0.47
  -1  -3  -7    3.40    0.50
   1  -3   7    4.05    0.49
  -1  -3  -7    3.51    0.46
   1  -3   7    4.63    0.52
   1  -3   7    4.28    0.46
  -1  -3  -7    4.78    0.41
  -1  -3  -7    4.61    0.58
   1  -3   7    3.95    0.57
   1  -3   7    3.45    0.43
   1  -3   7    3.39    0.38
   1  -3   8    2.98    0.45
  -1  -3  -8    2.87    0.54
   1   3   8    3.74    0.62
  -1  -3  -8    1.99    0.42
   1  -3   8    3.00    0.44
  -1  -3  -8    3.95    0.52
  -1  -3  -8    2.83    0.47
  -1  -3  -8    3.02    0.41
   1  -3   8    3.16    0.46
   1  -3   8    4.26    0.44
  -1  -3  -8    1.45    0.45
   1  -3   8    2.45    0.38
   1  -3   8    3.62    0.34
   1  -3   8    2.88    0.42
   1  -3   8    2.65    0.39
  -1  -3  -9    0.15    0.27
   1  -3   9    0.10    0.22
  -1  -3  -9   -0.04    0.19
  -1  -3  -9    0.05    0.24
   1  -3   9   -0.16    0.21
  -1  -3  -9    0.53    0.26
   1  -3   9   -0.04    0.21
   1   3   9    0.09    0.31
   1  -3   9    0.04    0.21
   1  -3   9   -0.19    0.22
  -1  -3  -9    0.06    0.24
   1  -3  10   19.86    1.25
   1  -3  10   21.39    1.24
   1  -3  10   21.20    1.88
   1   3  10   20.05    1.59
   1  -3  10   19.50    1.26
  -1  -3 -10   16.70    1.34
  -1  -3 -10   19.90    1.32
  -1  -3 -10   18.00    1.27
  -1  -3 -10   17.26    1.23
   1  -3  10   19.58    1.32
  -1  -3 -10   15.58    1.22
   1  -3  10   15.07    1.16
   1   3  11   79.72    4.40
  -1  -3 -11   78.85    4.00
  -1  -3 -11   70.80    3.93
   1  -3  11   81.87    4.05
   1  -3  11   68.96    3.88
   1  -3  11   87.02    3.91
   1  -3  11   83.45    4.81
  -1  -3 -11   66.92    4.01
   1  -3  11   84.96    3.97
  -1  -3 -12    1.94    0.38
  -1  -3 -12    1.62    0.35
   1  -3  12    1.38    0.36
   1  -3  12    1.89    0.41
   1  -3  12    1.73    0.35
   1  -3  12    1.53    0.33
  -1  -3 -12    2.60    0.40
   1  -3  12    2.11    0.35
   1   3  12    1.55    0.31
  -1  -3 -13   20.79    1.37
   1  -3  13   24.07    1.48
   1  -3  13   24.26    1.47
   1  -3  13   17.86    1.29
   1  -3  13   25.33    1.34
   1  -3  13   22.60    1.37
   1  -3  13   22.22    1.32
  -1  -3 -13   19.73    1.31
   1   3  13   23.56    1.36
   1  -3  14    8.39    0.74
   1  -3  14    9.06    0.75
   1  -3  14    8.75    0.64
   1  -3  14    9.28    0.69
   1   3  14    8.13    0.65
  -1  -3 -14    8.07    0.68
   1  -3  14    9.03    0.62
   1  -3  14    5.97    0.59
   1   3  15    3.70    0.39
  -1  -3 -15    3.54    0.41
   1  -3  15    3.94    0.45
   1  -3  15    3.94    0.34
   1  -3  15    5.20    0.52
  -1  -3 -16    0.08    0.25
   1   3  16   -0.06    0.14
   1  -3  16    0.03    0.15
   1   3  16    0.27    0.15
   1  -3  17   -0.02    0.10
   1   3  17   -0.01    0.08
  -1  -3 -17   -0.02    0.10
   1   3  17    0.11    0.09
  -1  -3 -17    0.02    0.14
   1  -4 -15    8.79    0.58
   1  -4 -15   10.33    0.60
  -1  -4  15   11.45    0.60
  -1  -4  15   10.17    0.58
   1  -4 -15    9.18    0.65
  -1  -4  14    2.05    0.21
   1  -4 -14    2.02    0.33
  -1  -4  14    1.71    0.26
  -1  -4  14    1.89    0.26
   1  -4 -14    2.03    0.29
  -1  -4  13    1.70    0.24
   1  -4 -13    1.55    0.30
   1  -4 -13    1.74    0.36
  -1  -4  13    1.59    0.29
  -1  -4  13    1.54    0.29
   1  -4 -12   13.63    0.87
   1  -4 -12   12.95    0.96
  -1  -4  12   13.71    0.93
  -1  -4  12   15.51    0.89
  -1  -4  12   14.22    0.96
   1  -4 -12   12.92    1.05
   1  -4 -12   11.21    0.94
   1  -4 -11    0.30    0.26
  -1  -4  11    0.40    0.23
   1  -4 -11    0.03    0.23
   1  -4 -11    0.21    0.26
   1  -4 -11   -0.06    0.31
  -1  -4  11    0.22    0.25
  -1  -4  11    0.08    0.23
   1  -4 -10   19.43    1.45
   1  -4 -10   18.67    1.50
  -1  -4  10   19.70    1.33
  -1  -4  10   21.66    1.28
   1  -4 -10   18.76    1.35
   1  -4 -10   20.48    1.32
  -1  -4  10   21.18    1.37
  -1  -4  10   22.95    1.27
   1  -4  -9   19.95    1.56
   1  -4  -9   21.87    1.61
  -1  -4   9   22.47    1.37
  -1  -4   9   22.52    1.41
   1  -4  -9   24.58    1.46
  -1  -4   9   21.91    1.29
  -1  -4   9   24.76    1.35
   1  -4  -9   16.20    1.29
  -1  -4   9   20.15    1.42
   1  -4  -8   31.82    1.78
  -1  -4   8   32.35    1.77
  -1  -4   8   33.03    2.00
  -1  -4   8   38.34    1.96
   1  -4  -8   29.99    1.94
  -1  -4   8   32.01    1.93
   1  -4  -8   30.07    2.13
   1  -4  -8   30.94    2.13
   1  -4  -8   32.36    1.97
  -1  -4   8   32.91    1.82
  -1  -4   8   36.28    1.89
  -1  -4   8   36.04    1.82
   1  -4  -8   32.02    1.80
   1  -4  -7    6.37    0.60
   1  -4  -7    5.34    0.77
  -1  -4   7    7.71    0.62
  -1  -4   7    7.83    0.61
   1  -4  -7    5.96    0.68
  -1  -4   7    7.61    0.68
  -1  -4   7    6.03    0.69
  -1  -4   7    6.02    0.65
  -1  -4   7    6.46    0.63
   1  -4  -7    6.65    0.83
  -1  -4   7    6.54    0.56
  -1  -4   7    7.11    0.64
   1  -4  -7    6.26    0.70
  -1  -4   7    7.39    1.04
   1  -4  -7    5.87    0.57
   1  -4  -7    6.28    0.56
   1  -4  -6   13.92    1.02
  -1  -4   6   15.70    1.03
   1  -4  -6   15.95    1.15
   1  -4  -6   11.68    1.08
   1  -4  -6   12.85    1.12
  -1  -4   6   15.49    1.09
  -1  -4   6   14.71    1.11
  -1  -4   6   13.25    0.99
  -1  -4   6   14.00    1.05
   1  -4  -6   13.79    1.25
   1  -4  -6   14.43    1.27
  -1  -4   6   13.04    0.91
  -1  -4   6   16.83    1.04
   1  -4  -6   13.70    1.23
   1  -4  -6   14.46    0.97
  -1  -4   6   13.84    1.48
   1  -4  -6   15.51    1.04
   1  -4  -6   12.07    1.27
  -1  -4   6   15.00    0.99
   1  -4  -5    4.38    0.71
  -1  -4   5    7.50    0.82
  -1  -4   5    5.48    0.53
  -1  -4   5    4.90    0.53
  -1  -4   5    5.27    0.57
  -1  -4   5    4.63    0.53
   1  -4  -5    4.83    0.60
  -1  -4   5    6.71    0.72
   1  -4  -5    5.10    0.75
   1  -4  -5    5.06    0.58
  -1  -4   5    5.87    0.59
   1  -4  -5    5.61    0.66
   1  -4  -5    5.65    0.66
   1  -4  -5    4.09    0.63
  -1  -4   5    5.20    0.61
  -1  -4   5    4.08    0.58
  -1  -4   5    5.51    0.66
   1  -4  -5    5.84    0.56
  -1  -4   5    4.34    0.82
  -1  -4   5    5.19    0.56
   1  -4  -5    5.84    0.60
   1  -4  -5    5.34    0.83
  -1  -4   4    3.22    0.52
  -1  -4   4    2.73    0.39
   1  -4  -4    2.12    0.35
   1  -4  -4    3.63    0.66
  -1  -4   4    3.21    0.43
  -1  -4   4    3.59    0.61
   1  -4  -4    2.72    0.42
   1  -4  -4    3.25    0.69
   1  -4  -4    2.62    0.46
   1  -4  -4    3.16    0.60
  -1  -4   4    3.80    0.61
  -1  -4   4    3.75    0.49
  -1  -4   4    2.89    0.41
   1  -4  -4    3.42    0.52
  -1  -4   4    2.35    0.41
   1  -4  -4    3.51    0.54
  -1  -4   4    3.10    0.49
   1  -4  -4    2.30    0.49
  -1  -4   4    3.09    0.49
  -1  -4   4    3.00    0.43
  -1  -4   4    4.11    0.67
  -1  -4   4    2.82    0.53
   1  -4  -4    2.57    0.46
  -1  -4   4    3.12    0.40
   1  -4  -4    2.97    0.48
   1  -4  -4    2.46    0.45
  -1  -4   4    3.03    0.61
   1  -4  -4    3.44    0.69
  -1  -4   4    3.04    0.45
  -1  -4   4    3.46    0.74
  -1  -4   3    0.62    0.24
   1  -4  -3   -0.10    0.27
   1  -4  -3    0.05    0.25
  -1  -4   3    0.63    0.37
   1  -4  -3    0.14    0.31
  -1  -4   3    0.32    0.20
   1  -4  -3    0.19    0.19
  -1  -4   3    0.50    0.38
   1  -4  -3    0.40    0.30
   1  -4  -3    0.28    0.31
  -1  -4   3    0.36    0.28
  -1  -4   3    0.50    0.27
  -1  -4   3    0.77    0.39
   1  -4  -3    0.48    0.40
   1  -4  -3    0.14    0.35
   1  -4  -3    0.40    0.27
   1  -4  -3    0.27    0.27
  -1  -4   3    0.38    0.29
  -1  -4   3    0.53    0.26
   1  -4  -3    0.43    0.33
  -1  -4   3    0.34    0.27
  -1  -4   3    0.43    0.24
  -1  -4   3    0.61    0.28
  -1  -4   3    0.32    0.39
  -1  -4   3    0.74    0.37
  -1  -4   3    0.32    0.24
   1  -4  -3    1.05    0.34
  -1  -4   3   -0.11    0.34
  -1  -4   3    0.34    0.25
  -1  -4   3   -0.10    0.31
   1  -4  -3    0.24    0.25
   1  -4  -3    0.33    0.36
   1  -4  -2    0.27    0.29
  -1  -4   2    0.84    0.22
   1  -4  -2    0.10    0.20
  -1  -4   2   -0.09    0.34
   1  -4  -2    0.38    0.37
   1  -4  -2    0.12    0.27
  -1  -4   2    0.11    0.27
  -1  -4   2    0.34    0.22
   1  -4  -2    0.36    0.21
   1  -4  -2    0.34    0.35
  -1  -4   2    0.24    0.29
  -1  -4   2    0.06    0.35
   1  -4  -2   -0.05    0.26
   1  -4  -2    0.13    0.29
  -1  -4   2    0.62    0.28
   1  -4  -2   -0.12    0.36
  -1  -4   2    0.17    0.26
  -1  -4   2   -0.04    0.26
   1  -4  -2    0.41    0.30
   1  -4  -2    0.21    0.29
  -1  -4   2    0.22    0.22
  -1  -4   2    0.21    0.29
  -1  -4   2    0.38    0.29
  -1  -4   2   -0.11    0.25
  -1  -4   2    0.64    0.38
  -1  -4   2    0.32    0.34
   1  -4  -2    0.09    0.26
  -1  -4   2    0.21    0.30
  -1  -4   2   -0.11    0.33
   1  -4  -2    0.35    0.29
   1  -4  -2    0.23    0.35
  -1  -4   2    0.31    0.27
   1  -4  -1   10.71    0.86
  -1  -4   1    9.09    0.77
  -1  -4   1    9.62    0.72
   1  -4  -1   10.05    0.88
  -1  -4   1    9.82    0.79
   1  -4  -1   11.26    1.19
  -1  -4   1   10.06    0.76
   1  -4  -1    6.81    0.74
  -1  -4   1   10.50    0.98
   1  -4  -1   10.18    1.01
  -1  -4   1   11.92    1.07
   1  -4  -1   10.02    1.00
  -1  -4   1   10.13    0.87
  -1  -4   1    9.53    0.85
   1  -4  -1   10.65    0.90
  -1  -4   1   10.25    0.87
   1  -4  -1    9.57    0.87
  -1  -4   1   11.08    0.89
  -1  -4   1    9.94    0.98
  -1  -4   1    8.83    0.79
   1  -4  -1   10.75    0.95
   1  -4  -1   11.89    0.90
  -1  -4   1    9.53    1.17
  -1  -4   1   10.83    0.87
   1  -4   0   22.27    1.39
   1  -4   0   19.12    1.20
   1  -4   0   19.37    1.39
  -1  -4   0   19.79    1.32
   1  -4   0   22.73    1.57
   1  -4   0   19.91    1.50
  -1  -4   0   19.63    1.49
  -1  -4   0   23.10    1.60
  -1  -4   0   18.71    1.23
   1  -4   0   15.17    1.26
  -1  -4   0   23.17    1.74
  -1  -4   0   23.04    1.35
   1  -4   0   20.97    1.77
   1  -4   0   17.20    1.78
   1  -4   0   19.60    1.41
  -1  -4   0   20.67    1.39
  -1  -4   0   22.35    1.41
   1  -4   0   23.59    1.46
  -1  -4   0   20.10    1.38
  -1  -4   0   22.31    1.39
   1  -4   0   19.32    1.46
  -1  -4   0   22.08    1.42
   1  -4   0   18.08    1.29
  -1  -4   0   19.88    1.43
   1  -4   0   23.51    1.54
  -1  -4   0   24.04    1.58
  -1  -4   0   23.73    1.51
  -1  -4   0   23.58    1.40
   1  -4   0   22.96    1.43
  -1  -4   0   22.25    1.40
  -1  -4   0   18.60    1.74
   1  -4   0   18.52    1.38
   1  -4   0   19.04    1.80
   1  -4   1   39.04    2.39
   1  -4   1   45.29    2.48
  -1  -4  -1   39.35    2.46
   1  -4   1   34.08    2.16
  -1  -4  -1   41.31    2.18
  -1  -4  -1   42.10    2.64
   1  -4   1   40.87    2.89
   1  -4   1   38.25    2.29
  -1  -4  -1   40.06    2.27
  -1  -4  -1   36.79    2.23
  -1  -4  -1   37.77    2.25
   1  -4   1   41.92    2.28
   1  -4   1   37.22    2.18
  -1  -4  -1   44.52    2.31
  -1  -4  -1   36.71    2.29
   1  -4   1   37.06    2.34
  -1  -4  -1   40.70    2.33
  -1  -4  -1   39.89    2.40
   1  -4   1   47.99    2.49
  -1  -4  -1   40.92    2.25
  -1  -4  -1   33.58    2.16
   1  -4   1   41.19    2.30
   1  -4   1   37.15    2.09
   1  -4   1   38.89    2.29
   1  -4   1   36.65    2.75
   1  -4   1   37.79    2.64
  -1  -4  -2    0.36    0.36
   1  -4   2    0.25    0.20
   1  -4   2    0.09    0.25
  -1  -4  -2    0.39    0.22
  -1  -4  -2    0.59    0.30
   1  -4   2    0.57    0.38
   1  -4   2    0.20    0.30
  -1  -4  -2    0.34    0.34
   1  -4   2    0.26    0.21
   1  -4   2    0.36    0.28
   1  -4   2    0.52    0.29
  -1  -4  -2    0.78    0.42
   1  -4   2    0.73    0.44
   1  -4   2    0.62    0.37
  -1  -4  -2    0.56    0.29
  -1  -4  -2    0.19    0.33
   1  -4   2    0.62    0.30
  -1  -4  -2    0.45    0.32
  -1  -4  -2    0.82    0.31
   1  -4   2    0.11    0.28
   1  -4   2    0.32    0.23
  -1  -4  -2   -0.05    0.27
  -1  -4  -2    0.26    0.31
   1  -4   2    0.69    0.36
  -1  -4  -2    0.09    0.30
   1  -4   2    0.22    0.27
   1  -4   2    0.23    0.40
   1  -4   2    1.30    0.44
  -1  -4  -2    0.21    0.34
   1  -4   2    0.64    0.31
  -1  -4  -2    0.45    0.28
   1  -4   3    6.62    0.66
   1  -4   3    6.19    0.61
  -1  -4  -3    5.51    0.63
   1  -4   3    6.99    0.91
  -1  -4  -3    7.01    0.88
  -1  -4  -3    7.89    0.67
   1  -4   3    5.87    0.64
   1  -4   3    7.78    0.78
   1  -4   3    8.03    0.85
  -1  -4  -3    7.08    0.89
  -1  -4  -3    6.63    0.79
   1  -4   3    7.83    1.04
   1  -4   3    6.71    0.70
  -1  -4  -3    7.20    0.71
  -1  -4  -3    5.34    0.68
  -1  -4  -3    7.03    0.72
   1  -4   3    7.81    0.69
  -1  -4  -3    6.12    0.71
   1  -4   3    6.39    0.64
   1  -4   3    7.08    0.75
  -1  -4  -3    6.94    0.78
  -1  -4  -3    8.14    0.80
   1  -4   3    9.61    0.92
   1  -4   3    7.62    0.69
   1  -4   3    5.92    0.93
   1  -4   3    6.06    0.67
   1  -4   3    7.94    1.00
  -1  -4  -3    6.57    0.93
  -1  -4  -3    6.07    0.64
  -1  -4  -4    8.22    0.68
  -1  -4  -4    8.12    0.92
   1  -4   4    7.34    0.93
   1  -4   4    6.51    0.58
   1  -4   4    6.53    0.67
   1  -4   4    8.35    0.69
   1  -4   4    7.62    0.67
   1  -4   4    7.35    0.77
  -1  -4  -4    7.26    0.89
  -1  -4  -4    7.51    0.84
   1  -4   4    7.57    0.74
  -1  -4  -4    8.00    0.71
   1  -4   4    7.06    1.01
  -1  -4  -4    9.05    0.83
  -1  -4  -4    7.02    0.73
   1  -4   4    7.98    0.72
   1  -4   4    7.47    0.99
  -1  -4  -4    6.06    0.64
   1  -4   4    9.05    1.10
   1  -4   4    6.52    0.72
  -1  -4  -4    7.43    0.76
   1  -4   4    6.61    0.66
  -1  -4  -4    5.53    0.65
  -1  -4  -4    7.70    0.79
  -1  -4  -4    6.42    0.76
  -1  -4  -5   41.71    2.53
   1  -4   5   40.28    2.54
  -1  -4  -5   44.98    2.15
   1  -4   5   35.87    2.06
   1  -4   5   38.27    2.17
   1  -4   5   40.19    2.22
  -1  -4  -5   42.96    2.21
  -1  -4  -5   34.59    2.24
  -1  -4  -5   41.84    2.31
  -1  -4  -5   37.60    2.28
  -1  -4  -5   37.84    2.14
   1  -4   5   35.49    2.16
   1  -4   5   37.94    2.75
   1  -4   5   35.99    2.62
   1  -4   5   34.70    2.15
  -1  -4  -5   35.08    2.23
   1  -4   5   40.07    2.25
   1  -4   5   40.94    2.14
  -1  -4  -5   39.31    2.42
   1  -4   5   46.89    2.38
  -1  -4  -5   41.76    2.53
   1  -4   5   38.90    2.18
   1  -4   5   33.72    2.09
  -1  -4  -5   36.97    2.29
  -1  -4  -5   44.16    2.32
  -1  -4  -6   77.27    4.25
  -1  -4  -6   69.38    4.12
   1  -4   6   78.24    3.93
   1  -4   6   72.09    3.81
  -1  -4  -6   76.33    4.04
  -1  -4  -6   89.78    4.09
  -1  -4  -6   78.11    4.03
  -1  -4  -6   71.99    4.00
   1  -4   6   74.00    4.36
   1  -4   6   78.35    4.64
   1  -4   6   79.57    3.90
   1  -4   6   74.68    4.21
   1  -4   6   82.71    3.84
   1  -4   6   80.03    3.93
  -1  -4  -6   82.81    3.91
   1  -4   6   71.40    3.87
   1  -4   6   79.78    3.96
   1  -4   6   74.16    3.92
  -1  -4  -6   77.25    3.86
   1  -4   6   84.72    3.98
  -1  -4  -6   66.03    3.91
  -1  -4  -7   20.52    1.65
  -1  -4  -7   19.61    1.50
   1  -4   7   24.04    1.36
   1  -4   7   18.55    1.25
  -1  -4  -7   20.55    1.43
  -1  -4  -7   20.63    1.42
  -1  -4  -7   18.04    1.36
   1  -4   7   20.02    1.85
   1  -4   7   20.24    1.25
   1  -4   7   22.89    1.24
   1  -4   7   18.00    1.28
   1  -4   7   20.71    1.35
   1  -4   7   22.17    1.30
  -1  -4  -7   21.47    1.27
   1  -4   7   22.81    1.35
  -1  -4  -7   17.89    1.30
  -1  -4  -7   20.96    1.25
   1  -4   7   19.53    1.32
  -1  -4  -8   43.90    2.67
  -1  -4  -8   46.58    2.83
  -1  -4  -8   54.73    3.07
   1  -4   8   51.05    2.62
  -1  -4  -8   53.42    2.57
  -1  -4  -8   44.69    2.74
  -1  -4  -8   51.64    2.77
  -1  -4  -8   51.12    2.53
  -1  -4  -8   42.66    2.58
   1  -4   8   63.18    2.71
   1  -4   8   47.57    2.68
   1  -4   8   51.46    2.68
   1  -4   9   16.66    1.21
   1  -4   9   22.21    1.21
   1  -4   9   19.22    1.24
   1  -4   9   22.06    1.29
  -1  -4  -9   18.79    1.30
  -1  -4  -9   17.27    1.30
   1  -4   9   20.02    1.21
  -1  -4  -9   21.07    1.56
  -1  -4  -9   17.48    1.34
  -1  -4  -9   16.55    1.20
  -1  -4 -10   -0.13    0.22
   1  -4  10    0.03    0.21
   1  -4  10   -0.12    0.22
   1  -4  10    0.14    0.20
   1  -4  10    0.07    0.18
  -1  -4 -10   -0.14    0.28
  -1  -4 -10    0.20    0.28
   1  -4  10    0.03    0.22
  -1  -4 -10    0.44    0.35
   1  -4  11    2.85    0.36
   1  -4  11    3.07    0.39
  -1  -4 -11    2.38    0.38
   1  -4  11    2.60    0.37
   1  -4  11    2.42    0.35
   1  -4  11    2.99    0.37
  -1  -4 -11    2.35    0.51
  -1  -4 -12   10.07    0.71
   1  -4  12    8.58    0.69
   1  -4  12   11.23    0.72
   1  -4  12    9.96    0.70
  -1  -4 -12    9.66    0.89
   1  -4  12   10.06    0.72
   1  -4  12   11.34    0.72
  -1  -4 -13   -0.18    0.20
  -1  -4 -13   -0.15    0.16
   1  -4  13   -0.09    0.17
   1  -4  13    0.02    0.13
   1  -4  13   -0.11    0.14
   1  -4  14    0.93    0.17
  -1  -4 -14    0.89    0.21
   1  -4  14    1.27    0.16
  -1  -4 -15    0.21    0.10
   1  -5 -10    0.42    0.18
  -1  -5  10    0.69    0.14
   1  -5  -9   -0.17    0.18
  -1  -5   9    0.09    0.13
   1  -5  -9   -0.08    0.19
  -1  -5   9    0.17    0.12
   1  -5  -9    0.20    0.17
   1  -5  -8    1.84    0.30
  -1  -5   8    1.36    0.21
   1  -5  -8    0.96    0.27
  -1  -5   8    1.32    0.21
   1  -5  -8    0.68    0.26
   1  -5  -7    4.03    0.44
   1  -5  -7    4.80    0.49
  -1  -5   7    5.13    0.40
  -1  -5   7    4.53    0.37
  -1  -5   7    5.14    0.42
   1  -5  -7    5.49    0.57
   1  -5  -7    3.87    0.52
   1  -5  -6   32.14    1.63
   1  -5  -6   22.67    1.62
   1  -5  -6   32.79    1.74
  -1  -5   6   29.91    1.57
   1  -5  -6   27.64    1.78
   1  -5  -6   30.10    1.60
  -1  -5   6   38.36    1.76
  -1  -5   6   32.22    1.60
   1  -5  -6   28.41    1.68
  -1  -5   6   31.12    1.60
  -1  -5   5   22.52    1.49
   1  -5  -5   27.58    1.51
  -1  -5   5   31.83    1.62
  -1  -5   5   29.57    1.51
   1  -5  -5   26.00    1.58
   1  -5  -5   23.93    1.53
  -1  -5   5   25.97    1.45
  -1  -5   5   27.45    1.44
  -1  -5   5   32.28    1.56
   1  -5  -5   27.77    1.52
   1  -5  -5   24.48    1.66
   1  -5  -4    0.23    0.20
  -1  -5   4    0.19    0.21
   1  -5  -4    0.45    0.21
  -1  -5   4    0.38    0.28
  -1  -5   4    0.40    0.22
   1  -5  -4    0.35    0.25
  -1  -5   4    0.52    0.24
   1  -5  -4    0.50    0.29
   1  -5  -4    0.57    0.25
  -1  -5   4    0.26    0.16
   1  -5  -4    0.34    0.31
  -1  -5   3    1.83    0.39
   1  -5  -3    2.03    0.41
   1  -5  -3    2.41    0.36
   1  -5  -3    2.49    0.47
   1  -5  -3    2.36    0.42
   1  -5  -3    2.21    0.36
  -1  -5   3    2.44    0.36
   1  -5  -3    2.89    0.49
  -1  -5   3    2.69    0.39
   1  -5  -3    2.26    0.38
   1  -5  -2    1.10    0.31
  -1  -5   2    1.16    0.40
   1  -5  -2    1.11    0.39
   1  -5  -2    1.77    0.40
  -1  -5   2    0.96    0.33
   1  -5  -2    1.36    0.35
  -1  -5   2    0.81    0.30
   1  -5  -2    1.09    0.32
   1  -5  -2    1.19    0.33
   1  -5  -2    0.96    0.37
  -1  -5   2    1.37    0.32
   1  -5  -1    3.99    0.56
  -1  -5   1    2.63    0.51
   1  -5  -1    4.08    0.57
  -1  -5   1    4.59    0.50
  -1  -5   1    3.50    0.44
   1  -5  -1    3.08    0.47
  -1  -5   1    3.06    0.43
   1  -5  -1    3.00    0.42
  -1  -5   0    9.37    0.80
   1  -5   0    9.34    0.79
  -1  -5   0    8.61    0.86
   1  -5   0    8.96    0.73
  -1  -5   0   10.03    0.77
   1  -5   0    9.97    0.79
  -1  -5   0    8.25    0.74
  -1  -5   0    9.54    0.83
   1  -5   0    9.04    0.83
   1  -5   0    9.74    0.89
  -1  -5   0   10.03    0.95
  -1  -5   0    8.79    0.86
   1  -5   0    9.68    0.89
   1  -5   1  102.94    4.92
  -1  -5  -1   98.04    4.97
   1  -5   1   89.20    4.73
  -1  -5  -1  111.56    5.14
   1  -5   1  102.94    5.02
  -1  -5  -1   97.10    4.87
   1  -5   1  103.12    4.90
  -1  -5  -1  101.26    4.93
   1  -5   1   99.03    4.94
   1  -5   2   11.58    0.88
  -1  -5  -2   11.13    0.85
  -1  -5  -2   10.73    0.91
   1  -5   2   11.58    0.82
   1  -5   2    9.75    0.75
   1  -5   2   11.48    0.85
   1  -5   2   10.77    0.89
  -1  -5  -2   12.33    0.86
  -1  -5  -2   11.43    0.88
  -1  -5  -2   11.53    0.88
  -1  -5  -2   12.86    1.06
   1  -5   2   11.93    0.97
  -1  -5  -3    8.09    0.74
  -1  -5  -3    7.08    0.73
   1  -5   3   10.43    0.84
  -1  -5  -3    8.15    0.82
  -1  -5  -3    8.99    0.87
   1  -5   3    8.81    0.70
   1  -5   3    9.46    0.74
  -1  -5  -3    9.78    0.74
   1  -5   3    8.81    0.65
  -1  -5  -3    8.44    0.72
  -1  -5  -3    9.31    0.70
   1  -5   3    9.04    0.75
  -1  -5  -4    2.84    0.44
  -1  -5  -4    2.29    0.40
  -1  -5  -4    3.51    0.51
   1  -5   4    3.25    0.40
   1  -5   4    3.27    0.34
  -1  -5  -4    3.75    0.41
   1  -5   4    4.31    0.44
  -1  -5  -4    3.11    0.50
   1  -5   4    3.25    0.37
  -1  -5  -4    3.84    0.41
  -1  -5  -4    3.88    0.44
   1  -5   4    4.35    0.48
  -1  -5  -5   -0.03    0.20
  -1  -5  -5   -0.12    0.27
  -1  -5  -5   -0.12    0.17
   1  -5   5    0.02    0.18
   1  -5   5    0.09    0.15
  -1  -5  -5   -0.10    0.20
   1  -5   5    0.11    0.18
  -1  -5  -5    0.28    0.28
   1  -5   5    0.12    0.18
  -1  -5  -5   -0.08    0.19
   1  -5   5    0.15    0.21
  -1  -5  -6    0.02    0.18
   1  -5   6    0.11    0.14
  -1  -5  -6    0.29    0.25
   1  -5   6    0.05    0.19
   1  -5   6    0.13    0.17
  -1  -5  -6    0.31    0.28
   1  -5   6   -0.02    0.15
   1  -5   6    0.06    0.14
   1  -5   7    3.92    0.36
  -1  -5  -7    4.24    0.45
   1  -5   7    3.54    0.30
   1  -5   7    4.25    0.39
  -1  -5  -7    4.07    0.52
  -1  -5  -7    4.38    0.46
   1  -5   8    1.90    0.24
   1  -5   8    1.84    0.25
  -1  -5  -8    1.86    0.27
  -1  -5  -8    1.63    0.35
  -1  -5  -8    1.91    0.30
   1  -5   9    2.31    0.24
   1  -5   9    2.57    0.25
  -1  -5  -9    1.81    0.32
  -1  -5  -9    1.57    0.26
   1  -5  10    3.60    0.28
   1  -5  10    3.46    0.28
  -1  -5 -10    4.04    0.31
  -1  -5 -10    3.40    0.36
  -2   0  20    4.61    0.32
  -2   0  20    4.80    0.36
   2   0 -19   -0.11    0.18
   2   0 -19    0.09    0.19
  -2   0  18    9.88    0.71
   2   0 -18    9.86    0.85
   2   0 -18    9.26    0.82
  -2   0  18   10.65    0.72
   2   0 -17    0.04    0.19
   2   0 -17    0.05    0.31
  -2   0  17    0.14    0.18
  -2   0  17   -0.13    0.25
   2   0 -17   -0.17    0.29
   2   0 -16  141.31    7.10
   2   0 -16  142.67    7.23
  -2   0  16  148.44    7.05
  -2   0  16  158.05    7.16
   2   0 -16  145.75    7.28
   2   0 -16  138.67    7.78
  -2   0  15   -0.09    0.24
   2   0 -15   -0.05    0.27
   2   0 -15    0.41    0.31
  -2   0  15   -0.20    0.28
  -2   0  15    0.08    0.24
   2   0 -15   -0.36    0.55
   2   0 -15    0.32    0.35
   2   0 -15    0.13    0.34
  -2   0  14   96.81    4.85
  -2   0  14   98.59    4.76
   2   0 -14   98.78    4.94
   2   0 -14   93.94    4.82
  -2   0  14   93.36    5.17
   2   0 -14   86.52    5.40
   2   0 -14   94.00    4.97
  -2   0  13    0.08    0.30
   2   0 -13   -0.05    0.26
   2   0 -13   -0.05    0.26
  -2   0  13    0.04    0.21
  -2   0  13    0.23    0.24
   2   0 -13    0.12    0.30
   2   0 -13   -0.12    0.45
  -2   0  12    4.54    0.54
  -2   0  12    5.05    0.51
   2   0 -12    5.70    0.61
   2   0 -12    4.74    0.78
   2   0 -12    4.74    0.56
  -2   0  12    4.89    0.67
   2   0 -11    0.47    0.36
  -2   0  11   -0.33    0.29
  -2   0  11    0.11    0.20
   2   0 -10  698.00   32.40
   2   0  -9   -0.07    0.28
   2   0  -8  133.96    6.67
   2   0  -7    0.05    0.22
   2   0  -6  641.62   29.46
  -2   0   6  681.04   29.38
  -2   0   6  630.65   29.14
   2   0  -5    0.03    0.15
  -2   0   5   -0.03    0.13
  -2   0   5    0.07    0.06
   2   0  -4  862.76   40.25
  -2   0   4  893.32   40.09
  -2   0   3    0.05    0.07
   2   0  -3   -0.02    0.10
  -2   0   2 1339.74   60.62
  -2   0   2 1339.32   60.68
  -2   0   1    0.08    0.10
   2   0  -1    0.07    0.08
   2   0   0 4586.14  207.41
  -2   0  -1    0.05    0.10
  -2   0  -2   31.62    1.50
   2   0   3   -0.25    0.13
  -2   0  -3    0.02    0.08
  -2   0  -4    9.36    0.53
   2   0   4    9.97    0.64
  -2   0  -5    0.49    0.09
   2   0   5   -0.03    0.12
  -2   0  -6   36.59    1.83
  -2   0  -6   39.69    2.19
   2   0   6   41.13    2.07
  -2   0  -6   38.72    1.82
   2   0   7   -0.04    0.18
  -2   0  -7    0.52    0.21
  -2   0  -7   -0.05    0.24
   2   0   8    7.55    0.68
  -2   0  -8    7.36    0.62
   2   0   9    0.24    0.27
  -2   0  -9    0.35    0.23
  -2   0  -9    0.10    0.22
  -2   0 -10    4.73    0.61
   2   0  10    5.91    0.65
  -2   0 -10    5.09    0.58
  -2   0 -11    0.04    0.21
   2   0  11   -0.08    0.19
   2   0  11    0.12    0.23
  -2   0 -11    0.27    0.27
  -2   0 -11    0.50    0.25
   2   0  12   38.39    2.45
  -2   0 -12   44.53    2.37
  -2   0 -12   39.15    2.28
  -2   0 -12   38.38    2.35
   2   0  12   40.83    2.30
   2   0  13   -0.15    0.27
  -2   0 -13   -0.54    0.35
  -2   0 -13    0.05    0.27
  -2   0 -13   -0.06    0.28
   2   0  13   -0.10    0.26
   2   0  14  140.43    7.69
  -2   0 -14  154.77    7.50
  -2   0 -14  161.87    7.59
  -2   0 -14  147.49    7.56
   2   0  14  159.26    7.49
   2   0  15   -0.08    0.29
  -2   0 -15    0.06    0.32
   2   0  15   -0.10    0.32
  -2   0 -15   -0.10    0.30
  -2   0 -15    0.17    0.33
  -2   0 -16    0.06    0.35
   2   0  16    0.29    0.23
   2   0  16    0.40    0.32
  -2   0 -16   -0.05    0.39
  -2   0 -16    0.24    0.34
  -2   0 -17    0.15    0.26
   2   0  17    0.39    0.27
   2   0  17    0.03    0.19
  -2   0 -17    0.10    0.32
  -2   0 -17   -0.04    0.26
  -2   0 -18   16.59    1.21
   2   0  18   21.43    1.20
  -2   0 -18   18.16    1.22
  -2   0 -18   16.46    1.13
  -2   0 -18   20.65    1.26
  -2   0 -19    0.06    0.18
  -2   0 -19   -0.02    0.14
  -2   0 -19    0.09    0.15
   2   0  19    0.09    0.16
  -2   0 -20    8.17    0.54
  -2  -1  20    5.19    0.38
   2  -1 -20    5.01    0.46
  -2  -1  20    4.59    0.37
  -2   1  20    4.71    0.35
   2  -1 -20    4.58    0.40
  -2   1  20    4.61    0.34
   2  -1 -19   19.90    1.27
  -2  -1  19   18.41    1.12
   2  -1 -19   19.37    1.17
  -2   1  19   20.33    1.10
   2   1 -19   17.85    1.13
   2  -1 -19   17.36    1.13
  -2   1  19   20.23    1.10
  -2  -1  19   17.33    1.01
   2   1 -18   16.52    1.12
   2  -1 -18   16.05    1.12
  -2  -1  18   16.94    1.01
   2   1 -18   12.99    0.96
  -2   1  18   17.59    1.05
   2  -1 -18   16.65    1.15
   2  -1 -18   18.72    1.29
   2   1 -17   10.69    0.91
  -2   1  17   14.60    0.98
   2  -1 -17   14.29    1.08
  -2  -1  17   14.29    0.99
   2   1 -17   13.52    1.05
   2  -1 -17   13.20    1.03
   2  -1 -16    0.62    0.29
   2  -1 -16    1.28    0.37
   2   1 -16    0.68    0.29
   2  -1 -16    1.65    0.43
   2   1 -16    0.63    0.33
   2  -1 -16    1.14    0.38
  -2   1  16    0.82    0.31
  -2   1  16    1.01    0.30
  -2  -1  16    0.96    0.31
   2   1 -15    0.20    0.29
   2  -1 -15   -0.16    0.32
   2  -1 -15    0.36    0.32
  -2  -1  15   -0.14    0.26
  -2   1  15   -0.09    0.26
  -2  -1  15    0.06    0.15
   2   1 -15    0.24    0.29
   2   1 -15    0.33    0.34
   2  -1 -15    0.18    0.29
   2  -1 -15    0.64    0.39
   2  -1 -14   37.62    2.28
   2   1 -14   36.81    2.63
   2   1 -14   38.53    2.29
   2   1 -14   38.38    2.21
   2  -1 -14   39.09    2.28
  -2  -1  14   33.70    1.98
   2  -1 -14   37.23    2.23
   2  -1 -14   36.58    2.74
  -2   1  14   37.29    2.11
  -2  -1  14   39.07    2.17
   2   1 -13   11.17    0.92
   2  -1 -13    7.93    0.88
  -2  -1  13   10.65    0.76
  -2  -1  13    9.97    1.08
   2   1 -13   11.50    1.24
   2  -1 -13    7.98    1.18
   2   1 -13   11.04    0.97
   2  -1 -13   10.55    0.95
   2  -1 -13   12.45    0.98
  -2   1  13   10.38    1.09
  -2  -1  13   11.40    0.89
  -2   1  13    9.84    0.83
  -2  -1  12  242.22   11.51
   2  -1 -12  245.14   12.33
   2  -1 -12  251.44   11.71
   2   1 -12  254.98   11.67
  -2  -1  12  238.61   12.00
   2   1 -12  232.16   12.12
   2  -1 -12  250.21   11.74
   2  -1 -12  241.69   11.69
  -2   1  12  269.47   12.06
  -2  -1  12  237.37   11.59
  -2   1  12  254.07   11.58
  -2  -1  11  106.89    4.98
  -2  -1  11   98.30    4.91
   2  -1 -11   94.18    5.57
   2   1 -11   98.04    5.50
  -2  -1  11  101.15    5.03
  -2   1  11  109.08    5.04
   2  -1 -11  103.39    5.12
   2  -1 -11   95.63    5.63
   2  -1 -11  103.20    5.12
  -2  -1  11   97.52    5.37
  -2   1  11  115.86    5.44
  -2  -1  10   25.87    1.89
   2  -1 -10   33.91    2.21
  -2   1  10   32.87    1.96
   2   1 -10   27.81    1.98
   2  -1 -10   28.10    2.07
  -2   1   9    3.35    0.52
  -2  -1   9    3.27    0.53
   2   1  -9    2.99    0.53
   2  -1  -9    2.97    0.56
  -2   1   8  153.46    6.61
   2  -1  -8  135.54    6.72
   2   1  -8  149.55    6.68
  -2  -1   8  140.26    6.63
   2  -1  -7   14.52    1.09
   2   1  -7   15.82    1.06
  -2  -1   7   13.24    0.84
   2  -1  -7   13.42    0.84
   2  -1  -7   12.70    0.82
  -2   1   7   14.02    0.99
  -2  -1   7   12.56    1.01
   2  -1  -7   12.20    0.83
  -2  -1   6   57.63    3.00
   2   1  -6   64.84    3.11
   2  -1  -6   63.46    3.16
  -2  -1   6   57.09    2.97
   2  -1  -6   57.79    2.98
   2  -1  -6   56.87    2.94
  -2   1   6   64.43    3.07
  -2  -1   6   62.03    3.13
   2  -1  -6   55.37    2.96
  -2  -1   5  641.82   29.35
   2   1  -5  684.26   29.38
   2  -1  -5  669.41   29.44
  -2  -1   5  616.63   29.32
   2  -1  -5  607.65   29.33
   2  -1  -5  620.98   29.29
   2  -1  -5  610.44   29.32
  -2  -1   5  632.59   29.41
  -2   1   5  721.60   29.38
  -2  -1   4    1.29    0.26
  -2  -1   4    1.01    0.23
  -2   1   4    1.47    0.24
   2  -1  -4    1.66    0.26
  -2  -1   4    1.73    0.26
   2   1  -4    1.33    0.23
   2  -1  -4    1.30    0.24
  -2  -1   3   39.41    2.07
  -2  -1   3   37.73    1.99
  -2  -1   3   39.22    2.05
  -2   1   3   39.64    1.98
   2  -1  -3   37.00    2.03
  -2  -1   3   40.44    1.96
   2  -1  -3   39.63    2.10
  -2  -1   3   40.54    2.07
   2  -1  -3   38.73    2.01
  -2  -1   2   55.73    2.64
   2  -1  -2   55.13    2.50
  -2  -1   2   50.02    2.66
  -2  -1   2   50.17    2.64
  -2  -1   2   50.56    2.57
  -2  -1   2   50.65    2.66
   2  -1  -2   53.84    2.66
   2  -1  -2   51.50    2.56
  -2   1   2   53.87    2.54
   2  -1  -1  465.29   21.58
  -2   1   1  476.13   21.53
   2  -1  -1  480.24   21.74
   2  -1  -1  485.90   21.68
  -2  -1   1  479.21   21.72
   2  -1  -1  468.65   21.56
   2  -1   0  293.43   13.33
  -2  -1   0  301.02   13.43
   2  -1   0  295.46   13.44
  -2   1   0  274.06   13.17
  -2   1   0  327.64   13.34
  -2  -1   0  307.57   13.35
  -2  -1   0  307.49   13.30
  -2  -1  -1 9940.26  449.35
  -2  -1  -1 9891.95  449.35
  -2  -1  -1 9999.00  449.42
  -2  -1  -2 6277.94  281.04
  -2  -1  -2 6255.18  281.08
  -2  -1  -2 6196.05  281.09
  -2  -1  -2 6094.29  281.09
  -2  -1  -2 6422.48  280.99
  -2   1  -2 6163.50  281.01
   2  -1   2 6007.69  281.07
  -2  -1  -3 1871.98   85.13
  -2  -1  -3 1853.80   85.16
  -2  -1  -3 1847.64   85.14
  -2  -1  -3 1993.82   85.04
   2  -1   3 1773.80   85.11
   2   1   4   20.53    1.31
   2  -1   4   20.52    1.07
   2  -1   4   20.77    1.22
  -2  -1  -4   23.43    1.27
  -2  -1  -4   22.39    1.27
  -2  -1  -4   20.56    1.29
  -2  -1  -5    3.50    0.37
  -2  -1  -5    2.30    0.40
   2  -1   5    2.38    0.33
   2  -1   5    2.62    0.33
  -2  -1  -5    3.44    0.37
   2  -1   5    2.71    0.26
   2  -1   5    2.46    0.33
  -2  -1  -6  279.97   12.33
  -2  -1  -6  263.47   12.49
  -2  -1  -6  280.55   12.30
   2  -1   6  258.23   12.30
   2  -1   6  252.76   12.24
   2  -1   6  270.85   12.23
   2  -1   6  252.95   12.28
  -2  -1  -7  240.49   10.60
  -2  -1  -7  228.66   10.31
  -2   1  -7  225.76   10.30
  -2  -1  -7  225.83   10.23
   2  -1   7  211.81   10.23
   2  -1   7  219.28   10.25
   2  -1   7  212.78   10.19
   2  -1   7  217.55   10.28
  -2  -1  -8  127.54    6.32
  -2   1  -8  120.50    6.01
  -2  -1  -8  128.40    6.04
   2  -1   8  126.94    6.04
  -2  -1  -9   61.08    3.42
  -2  -1  -9   58.42    3.14
  -2   1  -9   60.79    3.13
   2   1   9   63.86    3.38
   2  -1   9   60.48    3.16
   2  -1  10  103.09    4.55
   2  -1  10   86.40    4.46
  -2  -1 -10   88.86    4.51
  -2   1 -10   88.79    4.49
  -2  -1 -10   86.92    4.80
   2   1  10   89.36    4.73
   2  -1  10   84.54    4.51
  -2  -1 -10   88.49    4.46
  -2   1 -11   -0.05    0.23
  -2  -1 -11   -0.43    0.31
  -2  -1 -11    0.15    0.24
  -2  -1 -11    0.36    0.28
  -2  -1 -11    0.18    0.25
  -2   1 -11    0.04    0.20
   2  -1  11    0.08    0.23
   2  -1  11   -0.05    0.19
   2   1  11    0.08    0.20
   2   1  11    0.07    0.23
   2  -1  11    0.02    0.15
   2  -1  11    0.03    0.14
  -2  -1 -12    3.56    0.52
  -2   1 -12    3.77    0.52
  -2  -1 -12    2.99    0.60
  -2  -1 -12    2.68    0.47
  -2   1 -12    3.44    0.48
  -2  -1 -12    3.27    0.51
   2  -1  12    4.14    0.52
   2   1  12    4.12    0.50
   2   1  12    4.07    0.65
   2  -1  12    3.62    0.50
   2  -1  12    3.74    0.43
  -2  -1 -13   66.62    3.72
  -2   1 -13   72.62    3.75
  -2   1 -13   66.02    3.60
  -2  -1 -13   68.30    3.71
  -2  -1 -13   70.10    3.71
   2  -1  13   73.65    3.67
   2   1  13   73.30    3.64
   2   1  13   73.74    4.05
   2  -1  13   65.65    3.49
  -2   1 -14    4.25    0.59
  -2  -1 -14    4.48    0.60
  -2   1 -14    4.13    0.54
  -2  -1 -14    4.80    0.65
  -2  -1 -14    4.11    0.62
  -2   1 -14    5.06    0.62
   2   1  14    4.13    0.53
   2  -1  14    4.73    0.56
   2  -1  14    3.70    0.44
   2   1  14    5.31    0.76
   2   1  15    6.96    0.89
   2  -1  15   10.29    0.84
   2   1  15    8.47    0.77
  -2   1 -15    7.47    0.81
  -2  -1 -15    9.72    0.88
  -2   1 -15    8.22    0.77
  -2   1 -15   10.99    0.90
  -2  -1 -15   10.16    0.89
   2  -1  15    7.83    0.65
  -2   1 -16   92.61    4.65
  -2  -1 -16   88.87    4.75
   2   1  16   97.59    4.56
   2  -1  16   94.46    4.56
  -2  -1 -16   93.73    4.65
  -2   1 -16   81.80    4.48
  -2   1 -16   90.23    4.64
  -2  -1 -16   89.60    4.66
  -2   1 -17    5.70    0.61
   2   1  17    5.77    0.55
   2  -1  17    6.12    0.57
   2   1  17    6.28    0.57
  -2   1 -17    5.99    0.61
  -2  -1 -17    6.09    0.62
  -2  -1 -17    5.77    0.61
  -2   1 -17    4.20    0.47
  -2  -1 -17    5.65    0.67
   2   1  18    1.90    0.27
   2  -1  18    1.48    0.28
   2   1  18    1.70    0.28
  -2   1 -18    1.89    0.33
  -2  -1 -18    1.84    0.33
  -2  -1 -18    1.42    0.28
  -2   1 -18    1.40    0.27
  -2  -1 -18    0.94    0.30
  -2  -1 -19    1.44    0.25
  -2   1 -19    1.17    0.22
   2  -1  19    1.39    0.22
   2   1  19    1.49    0.21
  -2   2  19    3.64    0.30
  -2  -2  19    2.69    0.25
  -2  -2  19    3.59    0.32
  -2  -2  19    3.23    0.30
  -2   2  19    3.16    0.29
   2  -2 -19    3.17    0.37
  -2   2  18    3.92    0.40
  -2  -2  18    3.77    0.39
  -2  -2  18    3.88    0.43
  -2   2  18    4.85    0.43
   2  -2 -18    4.61    0.52
  -2   2  17   21.23    1.23
   2  -2 -17   20.29    1.40
  -2   2  17   21.54    1.24
  -2  -2  17   20.80    1.23
   2  -2 -17   16.07    1.13
  -2  -2  17   20.08    1.26
   2   2 -16    0.11    0.17
   2  -2 -16   -0.08    0.20
  -2  -2  16    0.14    0.26
  -2  -2  16    0.20    0.23
  -2   2  16    0.15    0.21
   2  -2 -16    0.13    0.33
   2   2 -15    0.09    0.22
   2  -2 -15    0.32    0.23
  -2  -2  15    0.67    0.32
  -2  -2  15    0.60    0.29
   2  -2 -15    0.28    0.33
   2  -2 -15   -0.06    0.26
  -2   2  15    0.33    0.24
   2  -2 -14   31.17    2.05
   2  -2 -14   26.91    2.36
  -2   2  14   31.50    1.79
   2  -2 -14   29.07    1.79
   2   2 -14   28.49    1.76
  -2  -2  14   29.15    1.58
  -2   2  14   28.80    2.10
   2  -2 -14   29.30    1.91
  -2  -2  14   24.80    2.07
   2  -2 -13   10.35    1.02
  -2   2  13   10.41    1.09
  -2  -2  13   10.34    0.74
  -2  -2  13   10.30    0.79
  -2  -2  13    9.83    0.81
   2  -2 -13    9.08    1.02
   2  -2 -13   10.22    0.94
  -2  -2  13    8.39    1.08
  -2   2  13   10.45    0.85
  -2  -2  13    9.48    0.79
   2  -2 -13   12.15    0.92
   2   2 -13   10.59    0.87
   2  -2 -13   12.31    1.41
   2   2 -12   24.96    1.59
   2  -2 -12   26.02    1.62
   2  -2 -12   21.32    1.96
  -2  -2  12   28.54    1.51
   2  -2 -12   25.53    1.79
  -2   2  12   26.83    1.92
  -2  -2  12   27.80    1.53
  -2  -2  12   27.94    1.59
   2  -2 -12   25.09    1.82
   2  -2 -12   26.28    1.69
   2  -2 -12   23.20    1.64
  -2  -2  12   23.28    1.51
  -2   2  12   26.69    1.61
  -2  -2  12   20.78    1.89
   2  -2 -12   24.31    2.18
   2   2 -11  132.70    6.59
   2  -2 -11  135.68    6.63
   2  -2 -11  123.69    7.10
  -2  -2  11  134.16    6.50
   2  -2 -11  128.15    6.83
  -2   2  11  159.59    7.10
  -2  -2  11  149.45    6.60
  -2  -2  11  150.88    6.53
   2  -2 -11  134.00    6.86
   2  -2 -11  129.24    6.66
   2  -2 -11  128.81    6.67
  -2  -2  11  118.02    6.48
  -2   2  11  149.52    6.62
  -2  -2  11  141.26    7.21
   2  -2 -11  128.96    7.39
  -2  -2  10    0.43    0.20
  -2  -2  10    0.52    0.21
   2  -2 -10    0.19    0.24
   2  -2 -10   -0.24    0.29
  -2   2  10    0.15    0.28
  -2  -2  10    0.16    0.18
  -2  -2  10    0.48    0.32
   2  -2 -10    0.19    0.31
   2  -2 -10    0.57    0.32
   2  -2 -10    0.24    0.32
   2   2 -10    0.15    0.19
   2  -2 -10    0.53    0.23
   2  -2 -10    0.19    0.29
   2  -2  -9    1.20    0.36
   2  -2  -9    2.11    0.43
   2  -2  -9    2.00    0.34
  -2  -2   9    1.70    0.27
  -2  -2   9    2.58    0.54
   2  -2  -9    1.51    0.28
   2  -2  -9    0.92    0.38
   2  -2  -9    1.29    0.49
  -2   2   9    1.35    0.36
  -2  -2   9    1.19    0.25
   2  -2  -8   -0.05    0.14
  -2  -2   8    0.16    0.27
   2  -2  -8    0.22    0.15
   2  -2  -8   -0.07    0.27
   2  -2  -8    0.20    0.30
   2   2  -8    0.05    0.16
   2  -2  -8   -0.04    0.21
   2  -2  -8    0.20    0.19
  -2   2   8    0.18    0.25
   2  -2  -7    2.81    0.44
  -2  -2   7    3.16    0.55
   2  -2  -7    2.53    0.43
   2   2  -7    2.70    0.39
   2  -2  -7    2.70    0.47
  -2  -2   7    2.49    0.44
  -2   2   7    2.56    0.44
   2  -2  -7    2.94    0.46
   2  -2  -6   80.05    4.02
  -2  -2   6   75.57    4.09
   2  -2  -6   76.83    3.99
   2  -2  -6   72.77    3.62
  -2   2   6   83.43    3.92
   2  -2  -6   73.91    3.90
   2   2  -6   71.03    3.72
  -2  -2   6   70.84    3.93
  -2  -2   6   72.25    3.67
   2  -2  -6   72.42    3.61
  -2  -2   6   76.54    3.55
  -2  -2   6   75.24    3.76
   2  -2  -6   77.94    3.91
   2  -2  -5    4.03    0.57
   2  -2  -5    5.05    0.61
  -2  -2   5    4.72    0.64
  -2  -2   5    5.45    0.57
   2  -2  -5    4.31    0.41
  -2   2   5    4.75    0.52
   2  -2  -5    5.21    0.65
   2  -2  -5    3.94    0.48
   2   2  -5    4.88    0.44
  -2  -2   5    4.56    0.59
   2  -2  -5    4.43    0.41
  -2  -2   5    4.70    0.45
  -2  -2   5    4.76    0.51
  -2  -2   5    4.74    0.37
   2  -2  -5    4.16    0.56
   2  -2  -4   13.30    1.06
   2  -2  -4   12.71    1.05
  -2  -2   4   11.69    0.91
  -2  -2   4   12.10    1.01
   2  -2  -4   10.99    1.03
   2  -2  -4   10.23    0.72
  -2   2   4   12.81    0.85
   2  -2  -4   13.24    1.04
   2  -2  -4   10.54    0.79
   2   2  -4   10.18    0.70
  -2  -2   4   11.89    0.99
  -2  -2   4   10.84    0.67
   2  -2  -4   11.12    0.73
  -2  -2   4   10.06    0.75
  -2  -2   4   10.84    0.84
   2  -2  -4   11.64    0.96
   2  -2  -3    1.19    0.37
  -2  -2   3    1.58    0.33
  -2  -2   3    1.81    0.40
   2  -2  -3    1.51    0.40
   2  -2  -3    1.80    0.26
  -2  -2   3    1.61    0.39
  -2   2   3    2.18    0.29
   2  -2  -3    2.04    0.40
   2   2  -3    1.16    0.19
   2  -2  -3    1.88    0.41
   2  -2  -3    1.79    0.25
  -2  -2   3    1.87    0.41
  -2  -2   3    1.63    0.27
   2  -2  -3    1.58    0.26
  -2  -2   3    2.12    0.37
  -2  -2   3    1.62    0.22
   2  -2  -3    1.54    0.40
  -2  -2   2    6.53    0.66
   2  -2  -2    5.15    0.65
   2  -2  -2    6.62    0.54
  -2  -2   2    5.41    0.60
   2  -2  -2    6.16    0.70
  -2  -2   2    5.65    0.63
   2  -2  -2    4.90    0.45
  -2  -2   2    5.32    0.66
  -2   2   2    5.64    0.46
   2  -2  -2    5.72    0.61
   2  -2  -2    5.21    0.62
   2  -2  -2    5.14    0.38
  -2  -2   2    5.47    0.65
   2  -2  -2    6.28    0.67
  -2  -2   2    6.31    0.51
   2  -2  -2    4.66    0.44
  -2  -2   2    6.24    0.43
  -2  -2   1    0.05    0.24
  -2  -2   1    0.17    0.22
   2  -2  -1    0.17    0.17
   2  -2  -1    0.13    0.18
  -2   2   1    0.20    0.12
  -2  -2   1    0.63    0.25
   2  -2  -1    0.10    0.14
  -2  -2   1    0.16    0.16
   2  -2  -1   -0.10    0.30
   2  -2  -1    0.09    0.18
  -2  -2   0    0.40    0.29
  -2  -2   0    0.47    0.17
   2  -2   0    0.09    0.17
  -2   2   0    0.66    0.13
  -2  -2   0    0.53    0.32
   2  -2   0    0.23    0.19
   2  -2   0    0.36    0.27
  -2  -2   0    0.29    0.22
   2  -2   0    0.06    0.26
  -2  -2   0    0.90    0.30
  -2  -2   0    0.24    0.14
   2  -2   0    0.68    0.37
  -2  -2   0    0.70    0.30
  -2  -2  -1  105.39    4.64
   2  -2   1   93.18    4.65
   2  -2   1   89.97    4.64
  -2  -2  -1  105.46    4.72
  -2  -2  -1   97.44    4.60
   2  -2   1   98.85    4.65
  -2  -2  -1  105.52    4.95
   2  -2   1   99.79    5.04
   2  -2   1  100.31    4.88
  -2  -2  -1   98.82    4.99
   2  -2   1  105.36    5.09
  -2  -2  -1   90.08    4.54
  -2  -2  -1  103.64    4.86
   2  -2   2  121.82    5.81
  -2  -2  -2  119.13    5.75
   2  -2   2  109.12    5.36
  -2  -2  -2  101.35    5.29
  -2  -2  -2  123.72    5.74
  -2  -2  -2  129.56    5.71
   2  -2   2  124.74    5.81
   2  -2   2  120.21    5.67
   2  -2   2  111.10    5.36
  -2  -2  -2  118.60    5.32
  -2  -2  -2  102.50    5.38
   2  -2   2  111.11    5.35
   2  -2   2  119.02    5.70
  -2  -2  -2  121.80    5.58
  -2  -2  -2  114.85    5.36
   2  -2   3    0.75    0.31
   2  -2   3    0.77    0.21
  -2  -2  -3    1.18    0.35
   2   2   3    1.72    0.39
  -2  -2  -3    1.59    0.41
  -2  -2  -3    1.87    0.36
   2  -2   3    1.33    0.39
   2  -2   3    1.37    0.34
  -2  -2  -3    0.92    0.22
   2  -2   3    1.07    0.23
  -2  -2  -3    1.03    0.22
   2  -2   3    0.86    0.22
   2  -2   3    0.94    0.33
  -2  -2  -3    1.38    0.22
  -2  -2  -3    1.22    0.32
   2  -2   4    8.83    0.91
  -2  -2  -4   15.19    0.99
   2  -2   4    8.85    0.90
   2  -2   4    8.52    0.90
   2  -2   4    8.24    0.66
   2   2   4    9.20    0.88
  -2  -2  -4   10.04    0.92
   2  -2   4    9.11    0.67
  -2  -2  -4    8.79    0.70
   2  -2   4    9.15    0.87
  -2  -2  -4   12.25    0.67
  -2  -2  -4   12.35    0.86
   2  -2   5  625.35   29.22
   2  -2   5  655.98   29.34
   2  -2   5  644.44   29.21
   2  -2   5  582.53   28.79
   2   2   5  643.08   29.23
  -2  -2  -5  632.05   29.30
  -2  -2  -5  647.32   29.18
   2  -2   5  580.82   28.79
  -2  -2  -5  668.88   28.88
  -2  -2  -5  659.97   28.75
   2  -2   5  618.95   29.11
  -2  -2  -5  688.76   29.00
   2  -2   6    1.44    0.35
   2  -2   6    0.40    0.25
   2  -2   6    0.95    0.20
   2   2   6    0.97    0.34
  -2  -2  -6    0.82    0.38
  -2  -2  -6    1.28    0.21
  -2  -2  -6    0.78    0.33
   2  -2   6    0.73    0.31
   2  -2   6    0.82    0.20
  -2  -2  -6    0.82    0.21
   2  -2   7   66.26    3.51
   2   2   7   65.00    3.64
  -2  -2  -7   70.45    3.82
  -2  -2  -7   64.15    3.26
   2  -2   7   64.72    3.52
   2  -2   7   66.54    3.44
   2   2   8    1.47    0.44
   2  -2   8    1.40    0.30
  -2  -2  -8    1.01    0.23
  -2  -2  -8    0.98    0.40
   2  -2   8    1.59    0.30
   2  -2   8    0.79    0.22
  -2  -2  -8    0.97    0.34
   2  -2   9  135.78    6.44
  -2  -2  -9  137.54    6.52
  -2  -2  -9  140.31    7.14
  -2  -2  -9  134.93    6.79
  -2  -2  -9  119.90    6.50
  -2  -2  -9  130.42    6.53
   2   2   9  143.24    6.99
  -2  -2  -9  131.69    6.53
   2  -2   9  151.08    6.66
  -2  -2  -9  139.41    6.58
   2  -2  10    1.04    0.26
  -2   2 -10    1.15    0.25
  -2  -2 -10    1.28    0.32
  -2  -2 -10    1.96    0.54
   2  -2  10    1.44    0.29
  -2  -2 -10    1.14    0.40
   2   2  10    2.10    0.50
  -2  -2 -10    1.40    0.33
  -2  -2 -10    1.46    0.33
   2  -2  10    1.44    0.29
  -2  -2 -10    1.27    0.32
   2  -2  10    1.35    0.58
   2  -2  11   29.90    1.71
   2  -2  11   32.65    1.66
   2  -2  11   27.13    1.67
  -2   2 -11   25.47    1.65
  -2  -2 -11   31.79    1.78
  -2  -2 -11   30.21    2.27
  -2  -2 -11   30.29    2.01
  -2  -2 -11   27.83    1.77
  -2  -2 -11   24.86    1.71
   2  -2  11   28.64    1.69
   2  -2  11   32.11    2.39
   2   2  11   30.85    2.11
  -2  -2 -11   29.06    1.75
   2  -2  12    0.16    0.21
  -2  -2 -12   -0.05    0.26
  -2  -2 -12   -0.05    0.29
   2  -2  12    0.36    0.22
   2  -2  12    0.04    0.20
  -2   2 -12    0.16    0.20
  -2  -2 -12    0.33    0.34
  -2  -2 -12    0.14    0.23
   2  -2  12    0.11    0.20
  -2  -2 -12    0.15    0.35
   2  -2  12    0.25    0.41
  -2  -2 -13   24.31    1.62
  -2  -2 -13   21.75    1.56
   2  -2  13   27.08    2.17
  -2  -2 -13   24.42    1.56
  -2  -2 -13   20.14    1.90
  -2   2 -13   21.20    1.46
   2  -2  13   27.06    1.52
   2  -2  13   29.67    1.47
   2  -2  13   23.30    1.42
  -2  -2 -13   25.18    1.78
   2  -2  13   25.83    1.53
   2   2  13   23.21    1.43
   2  -2  14   19.43    1.23
   2   2  14   15.70    1.12
  -2   2 -14   17.00    1.20
  -2  -2 -14   17.96    1.27
   2  -2  14   20.84    1.15
   2  -2  14   21.47    1.24
   2  -2  14   18.04    1.11
  -2  -2 -14   19.27    1.50
  -2   2 -14   21.44    1.34
  -2  -2 -14   18.85    1.32
   2  -2  15    8.40    0.65
  -2  -2 -15    7.25    0.68
  -2  -2 -15    7.77    0.75
  -2   2 -15    8.49    0.72
  -2  -2 -15    7.14    0.83
   2   2  15    7.42    0.59
   2  -2  15    7.13    0.64
   2  -2  16    2.07    0.30
  -2   2 -16    1.41    0.30
  -2  -2 -16    1.83    0.35
   2  -2  16    1.49    0.34
  -2  -2 -16    1.95    0.32
  -2  -2 -16    1.99    0.43
   2  -2  16    2.12    0.30
   2   2  16    1.67    0.24
   2   2  16    1.81    0.32
   2  -2  17    3.83    0.42
  -2  -2 -17    3.90    0.49
   2  -2  17    2.84    0.35
  -2  -2 -17    2.77    0.40
  -2  -2 -17    3.25    0.43
  -2   2 -17    2.66    0.33
   2   2  17    3.43    0.39
   2  -2  18    1.26    0.23
   2  -2  18    1.60    0.25
  -2  -2 -18    0.96    0.25
   2   2  18    1.53    0.24
  -2  -2 -18    1.77    0.25
   2  -2  19    6.98    0.43
   2   2  19    6.88    0.43
   2   2  19    6.99    0.43
   2  -2  19    7.40    0.44
   2  -3 -18    0.14    0.08
  -2  -3  18    0.07    0.07
  -2  -3  17    0.46    0.16
  -2  -3  17    0.24    0.12
  -2   3  17    0.24    0.12
   2  -3 -17    0.43    0.19
   2  -3 -17    0.25    0.11
  -2   3  17    0.41    0.13
   2  -3 -16    1.46    0.27
  -2  -3  16    1.14    0.25
  -2  -3  16    1.45    0.24
  -2   3  16    1.03    0.21
   2  -3 -16    1.70    0.34
   2  -3 -16    0.90    0.23
  -2   3  16    1.43    0.22
  -2  -3  15    0.22    0.13
  -2   3  15   -0.06    0.16
   2  -3 -15    0.40    0.22
  -2  -3  15    0.04    0.22
  -2  -3  15   -0.06    0.19
   2  -3 -15    0.15    0.27
  -2   3  15   -0.08    0.15
   2  -3 -15   -0.04    0.22
   2  -3 -14    0.26    0.27
  -2  -3  14    1.05    0.22
  -2   3  14    0.61    0.22
   2  -3 -14    0.51    0.25
  -2  -3  14    0.81    0.30
  -2   3  14    0.72    0.22
   2  -3 -14    0.71    0.37
  -2  -3  14    0.68    0.26
   2  -3 -14    0.30    0.25
  -2  -3  14    0.85    0.26
   2  -3 -13    8.16    0.77
  -2   3  13    9.00    0.69
  -2  -3  13    7.97    0.69
  -2  -3  13    9.07    0.80
  -2  -3  13    8.38    0.65
   2  -3 -13    6.06    0.77
   2  -3 -13    7.97    0.87
  -2  -3  13    8.64    0.74
  -2   3  13    8.81    0.70
   2  -3 -12    2.73    0.55
   2  -3 -12    0.95    0.59
   2  -3 -12    2.86    0.46
  -2  -3  12    2.24    0.61
  -2  -3  12    2.71    0.41
  -2  -3  12    2.82    0.42
  -2  -3  12    2.63    0.38
  -2   3  12    2.51    0.36
   2  -3 -12    2.98    0.57
   2  -3 -11    2.23    0.73
   2  -3 -11    2.79    0.57
  -2  -3  11    3.33    0.44
  -2  -3  11    3.60    0.46
   2  -3 -11    2.94    0.59
   2  -3 -11    3.91    0.51
   2  -3 -11    3.23    0.50
  -2  -3  11    2.47    0.64
  -2   3  11    3.22    0.58
   2  -3 -11    2.58    0.53
  -2   3  11    3.19    0.40
   2  -3 -11    1.93    0.40
   2  -3 -10    2.90    0.79
  -2   3  10    2.04    0.46
   2  -3 -10    3.39    0.66
   2  -3 -10    3.51    0.62
   2  -3 -10    3.11    0.50
   2  -3 -10    2.61    0.45
  -2  -3  10    2.37    0.65
  -2  -3  10    3.36    0.44
  -2  -3  10    3.21    0.43
   2  -3 -10    2.72    0.61
  -2   3  10    2.96    0.38
   2  -3 -10    2.49    0.43
  -2  -3   9   20.24    1.28
   2  -3  -9   17.89    1.27
   2  -3  -9   15.97    1.24
  -2   3   9   16.97    1.12
   2  -3  -9   15.87    1.53
  -2   3   9   16.69    1.39
  -2  -3   9   16.36    1.62
   2  -3  -9   17.43    1.42
   2  -3  -9   17.42    1.46
  -2  -3   9   17.57    1.27
  -2  -3   9   19.29    1.21
  -2  -3   9   20.63    1.20
  -2  -3   9   18.88    1.20
  -2  -3   9   21.30    1.26
   2  -3  -9   16.32    1.29
  -2  -3   8    1.44    0.31
  -2  -3   8    0.82    0.24
  -2  -3   8    0.74    0.28
   2  -3  -8    0.95    0.42
   2  -3  -8    1.01    0.39
   2  -3  -8    1.39    0.32
   2  -3  -8    0.58    0.30
  -2  -3   8    1.09    0.28
   2  -3  -8    0.62    0.26
  -2  -3   8    0.45    0.43
   2  -3  -8    0.66    0.33
  -2   3   8    0.81    0.32
   2  -3  -8    0.88    0.38
  -2  -3   8    0.53    0.31
  -2  -3   8    1.22    0.31
  -2  -3   8    1.18    0.33
   2  -3  -7    8.14    0.67
   2  -3  -7    6.53    1.04
  -2   3   7    8.64    0.85
   2  -3  -7    7.02    0.92
  -2  -3   7    8.65    0.71
  -2  -3   7    8.55    0.77
   2  -3  -7    8.35    0.66
   2  -3  -7    8.07    0.89
  -2  -3   7    8.74    0.68
  -2  -3   7    9.61    0.71
  -2  -3   7    9.96    0.74
   2  -3  -7    6.62    0.82
   2  -3  -7    9.61    0.97
  -2  -3   7    8.64    0.67
   2  -3  -7    7.02    0.67
   2  -3  -7    7.65    0.94
  -2  -3   7    7.71    0.71
   2  -3  -7    9.66    0.83
   2  -3  -7    6.77    0.71
  -2  -3   7    9.38    1.14
   2  -3  -7    7.70    0.92
   2  -3  -7    7.56    0.68
  -2  -3   7    8.18    0.72
  -2  -3   7    9.28    0.85
  -2  -3   7    8.54    0.65
  -2  -3   7    9.27    0.76
  -2  -3   7    9.91    0.83
   2  -3  -6   81.35    3.97
   2  -3  -6   80.87    4.73
   2  -3  -6   77.29    3.94
  -2  -3   6   77.85    4.06
   2  -3  -6   79.17    4.47
  -2  -3   6   77.50    4.58
  -2  -3   6   80.23    3.93
   2  -3  -6   72.40    3.99
   2  -3  -6   77.87    4.34
  -2  -3   6   85.34    4.25
  -2  -3   6   88.57    3.90
  -2  -3   6   77.87    3.92
  -2  -3   6   80.79    3.95
  -2  -3   6   72.71    3.98
   2  -3  -6   84.29    4.29
  -2  -3   6   96.10    4.20
   2  -3  -6   69.23    3.99
   2  -3  -6   79.12    4.52
  -2  -3   6   81.63    3.96
   2  -3  -6   82.17    4.12
   2  -3  -6   72.36    4.02
  -2  -3   6   77.70    4.03
  -2  -3   6   82.80    4.17
  -2   3   6   79.39    4.17
   2  -3  -6   73.72    4.42
  -2  -3   6   79.54    4.11
  -2  -3   6   85.02    4.04
  -2   3   5   94.91    4.62
   2  -3  -5   90.90    4.91
  -2  -3   5   87.19    4.50
  -2  -3   5   86.20    4.43
   2  -3  -5   84.08    4.50
  -2  -3   5   98.35    4.91
  -2  -3   5   89.88    5.05
  -2  -3   5   86.45    4.42
   2  -3  -5   91.71    5.00
   2  -3  -5   92.18    4.46
  -2  -3   5   88.84    4.54
  -2  -3   5   90.57    4.37
  -2  -3   5   96.54    4.76
   2  -3  -5   94.76    4.92
  -2  -3   5   86.40    4.36
  -2  -3   5   89.79    4.41
  -2  -3   5  106.53    4.72
   2  -3  -5   92.96    4.72
  -2  -3   5  105.64    4.65
  -2  -3   5   86.01    4.44
   2  -3  -5   86.62    4.53
   2  -3  -5   97.27    5.10
   2  -3  -5   92.95    4.58
   2  -3  -5   86.80    4.58
   2  -3  -5   81.71    4.48
  -2  -3   5   87.79    4.55
  -2  -3   5   90.06    4.51
   2  -3  -5   92.52    4.47
  -2  -3   5   86.60    4.52
  -2  -3   5   96.70    4.66
   2  -3  -4  238.95   11.15
  -2  -3   4  238.38   11.19
  -2  -3   4  229.54   11.70
  -2  -3   4  223.15   11.09
  -2  -3   4  218.16   11.11
  -2  -3   4  257.64   11.65
   2  -3  -4  208.25   11.18
   2  -3  -4  245.32   11.79
   2  -3  -4  250.07   11.39
  -2  -3   4  258.28   11.31
   2  -3  -4  235.52   11.42
  -2  -3   4  271.98   11.38
  -2  -3   4  221.68   11.07
   2  -3  -4  248.70   11.83
  -2  -3   4  231.17   11.15
   2  -3  -4  218.30   11.21
   2  -3  -4  285.61   11.34
   2  -3  -4  250.74   11.27
  -2  -3   4  227.59   11.21
  -2  -3   4  241.19   11.20
  -2  -3   4  235.91   11.24
   2  -3  -4  242.79   11.66
  -2  -3   4  247.70   11.08
  -2  -3   4  231.61   11.22
  -2  -3   4  260.98   11.51
   2  -3  -4  244.67   11.58
   2  -3  -4  245.46   11.17
  -2  -3   3    5.36    0.80
   2  -3  -3    4.39    0.60
  -2  -3   3    4.09    0.52
  -2  -3   3    5.16    0.61
  -2  -3   3    5.54    0.60
  -2  -3   3    4.51    0.48
  -2  -3   3    5.21    0.74
   2  -3  -3    3.67    0.50
   2  -3  -3    4.78    0.80
   2  -3  -3    4.33    0.73
  -2  -3   3    6.17    0.51
  -2  -3   3    5.62    0.72
   2  -3  -3    3.60    0.48
  -2  -3   3    4.61    0.50
   2  -3  -3    3.93    0.51
   2  -3  -3    3.84    0.75
   2  -3  -3    4.49    0.55
  -2  -3   3    4.20    0.53
   2  -3  -3    2.95    0.50
  -2  -3   3    4.49    0.52
  -2  -3   3    4.18    0.51
   2  -3  -3    3.81    0.59
   2  -3  -3    4.01    0.50
   2  -3  -2  133.00    6.91
   2  -3  -2  135.53    6.27
  -2  -3   2  135.35    6.40
  -2  -3   2  126.07    6.29
   2  -3  -2  126.75    6.51
  -2  -3   2  129.78    6.39
  -2  -3   2  125.94    6.33
   2  -3  -2  134.13    6.89
  -2  -3   2  139.61    6.72
  -2  -3   2  123.65    6.68
  -2  -3   2  121.90    6.73
   2  -3  -2  132.69    6.76
  -2  -3   2  124.99    6.29
   2  -3  -2  123.95    6.23
  -2  -3   2  132.54    6.17
   2  -3  -1   81.26    4.52
  -2  -3   1   82.24    4.49
   2  -3  -1   80.80    4.28
  -2  -3   1   88.01    4.50
   2  -3  -1   80.15    4.05
   2  -3  -1   77.43    4.03
   2  -3   0   17.34    1.15
  -2  -3   0   17.51    1.08
   2  -3   0   17.65    1.50
  -2  -3   0   17.71    1.37
   2  -3   0   17.99    1.65
   2  -3   0   18.29    1.61
  -2  -3   0   17.34    1.44
  -2  -3   0   17.07    1.43
   2  -3   0   17.08    1.35
   2  -3   0   17.96    1.16
  -2  -3   0   17.61    1.52
   2   3   1    8.71    0.91
  -2  -3  -1   10.91    1.15
   2  -3   1   10.14    1.15
   2  -3   1   10.02    1.00
   2  -3   1   11.44    1.21
  -2  -3  -1   10.96    0.75
  -2  -3  -1   11.51    1.03
   2  -3   2   11.97    1.14
  -2  -3  -2   11.02    0.99
  -2  -3  -2   10.63    0.83
  -2  -3  -2    8.91    0.73
   2  -3   2    9.56    1.02
  -2  -3  -2    9.67    1.01
   2  -3   2    9.70    0.82
   2  -3   2    8.85    1.09
   2  -3   2   10.30    1.15
  -2  -3  -2    8.41    0.73
   2  -3   2    8.09    0.78
  -2  -3  -2    8.78    0.77
  -2  -3  -2    8.16    0.81
  -2  -3  -2   10.98    0.82
  -2  -3  -2   10.26    0.81
   2   3   2   10.25    0.97
  -2  -3  -2    9.91    1.08
   2  -3   2   10.04    0.75
  -2  -3  -2    9.67    0.71
   2  -3   2   11.96    0.83
   2  -3   2   10.61    0.79
   2  -3   3    4.96    0.52
   2  -3   3    7.51    0.61
  -2  -3  -3    6.70    0.87
   2  -3   3    6.07    0.82
  -2  -3  -3    7.17    0.64
  -2  -3  -3    7.66    0.79
  -2  -3  -3    6.85    0.53
   2  -3   3    4.45    0.52
  -2  -3  -3    5.97    0.75
   2  -3   3    4.55    0.72
   2  -3   3    4.82    0.79
   2  -3   3    4.78    0.56
  -2  -3  -3    5.99    0.56
   2  -3   3    6.21    0.87
  -2  -3  -3    6.03    0.56
   2  -3   3    4.79    0.56
  -2  -3  -3    4.95    0.57
  -2  -3  -3    4.42    0.54
  -2  -3  -3    7.16    0.64
  -2  -3  -3    5.05    0.61
   2  -3   3    7.79    0.71
   2  -3   3    4.17    0.52
  -2  -3  -3    5.35    0.59
  -2  -3  -3    5.06    0.61
   2  -3   3    4.42    0.53
   2   3   3    6.20    0.75
   2  -3   3    5.72    0.56
   2  -3   4   13.59    1.23
  -2  -3  -4   12.86    0.97
  -2  -3  -4   15.57    1.17
  -2  -3  -4   13.92    0.86
   2  -3   4   11.86    0.91
   2  -3   4   12.10    0.89
  -2  -3  -4   14.09    1.20
   2  -3   4   12.81    1.26
   2  -3   4   11.72    0.93
  -2  -3  -4   13.04    0.89
   2  -3   4   13.16    1.28
  -2  -3  -4   11.91    1.03
   2  -3   4   12.48    0.96
   2  -3   4   16.55    1.08
   2  -3   4   13.40    0.99
  -2  -3  -4   12.96    0.90
   2  -3   4   12.85    1.30
  -2  -3  -4   13.66    0.99
  -2  -3  -4   11.83    1.01
  -2  -3  -4   12.77    0.97
   2  -3   4   11.30    0.94
  -2  -3  -4   11.03    0.91
   2   3   4   12.03    1.14
   2  -3   4   14.13    0.94
   2   3   5   53.03    3.16
   2  -3   5   57.66    3.33
  -2  -3  -5   54.04    2.75
   2  -3   5   49.83    2.80
   2  -3   5   53.22    3.34
   2  -3   5   53.43    3.15
  -2  -3  -5   62.84    2.74
  -2  -3  -5   61.80    3.11
   2  -3   5   49.21    2.80
   2  -3   5   49.23    2.78
   2  -3   5   53.47    2.76
  -2  -3  -5   47.31    2.92
   2  -3   5   54.55    2.86
   2  -3   5   47.79    2.80
   2  -3   5   55.62    3.34
  -2  -3  -5   52.51    2.77
  -2  -3  -5   50.49    2.87
  -2  -3  -5   54.59    2.88
  -2  -3  -5   54.40    2.86
  -2  -3  -5   52.27    2.94
  -2  -3  -5   60.29    2.95
   2  -3   5   55.22    2.82
   2  -3   5   52.41    2.79
  -2  -3  -5   47.63    2.80
   2  -3   5   54.21    2.78
   2  -3   5   52.01    2.82
   2  -3   5   56.79    2.79
   2   3   6   14.32    1.27
   2  -3   6   11.13    1.19
   2  -3   6   13.54    1.38
   2  -3   6   13.07    0.95
   2  -3   6   11.13    0.91
   2  -3   6   14.21    0.92
   2  -3   6   14.02    1.20
   2  -3   6   11.86    0.95
  -2  -3  -6   13.33    1.09
   2  -3   6   13.92    0.99
  -2  -3  -6   14.12    0.93
   2  -3   6   11.84    0.94
   2  -3   6   11.01    1.20
  -2  -3  -6   12.97    1.03
  -2  -3  -6   14.22    1.04
  -2  -3  -6   16.45    1.11
  -2  -3  -6   14.19    1.01
  -2  -3  -6   13.40    1.08
   2  -3   6   15.36    1.03
   2  -3   6   15.84    0.95
   2  -3   6   12.97    0.96
   2  -3   6   12.79    0.95
  -2  -3  -6   14.73    0.92
  -2  -3  -6   13.25    0.95
   2   3   7   25.29    1.62
   2  -3   7   12.63    1.05
   2  -3   7   15.13    1.52
   2  -3   7   23.21    1.51
   2  -3   7   22.48    1.07
   2  -3   7   11.41    1.00
   2  -3   7   23.08    1.41
  -2  -3  -7   16.00    1.23
   2  -3   7   22.90    1.08
  -2  -3  -7   14.68    0.99
   2  -3   7   19.04    1.45
  -2  -3  -7   11.88    1.01
  -2  -3  -7   13.43    1.13
   2  -3   7   14.59    1.07
  -2  -3  -7   13.15    0.93
   2  -3   7   12.93    0.99
   2  -3   7   13.11    1.03
  -2  -3  -7   12.11    1.09
  -2  -3  -7   21.62    1.24
  -2  -3  -8    2.89    0.50
   2  -3   8    3.37    0.73
   2   3   8    3.00    0.61
  -2  -3  -8    3.30    0.49
   2  -3   8    3.16    0.46
  -2  -3  -8    3.04    0.57
   2  -3   8    3.28    0.33
   2  -3   8    2.64    0.41
  -2  -3  -8    3.00    0.44
   2  -3   8    3.05    0.42
   2  -3   8    3.07    0.42
  -2  -3  -8    3.85    0.50
  -2  -3  -8    2.81    0.47
   2  -3   9   23.20    1.47
   2  -3   9   26.78    1.50
   2  -3   9   23.15    2.07
  -2  -3  -9   22.38    1.58
  -2  -3  -9   23.80    1.77
   2   3   9   25.94    1.89
   2  -3   9   23.20    1.51
  -2  -3  -9   25.93    1.60
  -2  -3  -9   29.22    1.57
  -2  -3  -9   22.48    1.49
  -2  -3  -9   23.06    1.45
   2  -3   9   24.27    1.52
  -2  -3  -9   21.89    1.56
   2  -3   9   20.53    1.46
  -2  -3 -10   14.72    1.11
  -2  -3 -10   17.34    1.39
   2   3  10   15.52    1.39
   2  -3  10   14.12    1.04
   2  -3  10   10.64    0.97
  -2  -3 -10   15.43    1.12
  -2  -3 -10   15.06    1.08
  -2  -3 -10   11.99    0.98
   2  -3  10   16.10    1.04
  -2  -3 -10   14.38    1.11
   2  -3  10   13.75    1.06
  -2  -3 -11    0.35    0.24
   2  -3  11    0.76    0.28
   2  -3  11    1.10    0.33
  -2  -3 -11    1.10    0.34
  -2  -3 -11    1.93    0.50
  -2  -3 -11    0.74    0.35
  -2  -3 -11    0.89    0.27
  -2  -3 -11    1.19    0.35
   2   3  11    0.62    0.39
   2  -3  11    0.95    0.30
   2  -3  11    1.12    0.35
  -2  -3 -12   16.67    1.13
  -2  -3 -12   15.32    1.10
   2  -3  12   16.21    1.09
   2  -3  12   13.59    1.07
  -2  -3 -12   16.24    1.36
  -2  -3 -12   14.50    1.10
   2  -3  12   17.15    1.17
   2  -3  12   18.52    1.08
   2  -3  12   17.03    1.13
  -2  -3 -13    1.10    0.29
   2  -3  13    1.45    0.29
   2  -3  13    0.85    0.26
   2  -3  13    1.40    0.32
   2  -3  13    1.54    0.30
  -2  -3 -13    1.09    0.42
   2  -3  13    1.36    0.33
   2  -3  13    1.01    0.31
  -2  -3 -13    0.99    0.27
   2  -3  14    2.35    0.34
   2  -3  14    2.40    0.31
   2  -3  14    3.11    0.34
   2  -3  14    3.01    0.38
   2   3  14    2.82    0.36
   2  -3  14    2.76    0.39
   2  -3  14    3.65    0.46
  -2  -3 -14    3.45    0.52
   2  -3  15   13.15    0.78
   2  -3  15   14.53    0.95
   2  -3  15   13.82    0.88
  -2  -3 -15   16.24    1.10
   2   3  15   13.73    0.87
   2  -3  15   13.22    0.90
   2  -3  16    0.02    0.15
   2  -3  16    0.22    0.14
   2   3  16    0.11    0.13
  -2  -3 -16    0.20    0.19
  -2  -3 -17    3.02    0.30
   2  -3  17    2.94    0.26
   2   3  17    2.18    0.21
  -2  -3 -17    2.95    0.28
   2  -4 -15    0.95    0.15
   2  -4 -15    0.89    0.16
  -2  -4  15    1.03    0.16
  -2  -4  15    1.23    0.17
   2  -4 -15    1.05    0.18
   2  -4 -14    9.36    0.68
  -2  -4  14   10.85    0.62
  -2  -4  14   10.35    0.69
   2  -4 -14   10.17    0.75
  -2  -4  14   11.77    0.72
   2  -4 -13   29.82    1.76
  -2  -4  13   33.76    1.79
  -2  -4  13   34.92    1.68
  -2  -4  13   32.81    1.76
   2  -4 -13   32.23    1.86
   2  -4 -13   29.64    1.78
   2  -4 -12    8.32    0.62
   2  -4 -12    7.28    0.70
  -2  -4  12    7.99    0.69
  -2  -4  12    8.46    0.62
  -2  -4  12    8.58    0.70
  -2  -4  12    9.48    0.63
   2  -4 -12    7.92    0.76
   2  -4 -12    8.49    0.76
   2  -4 -11   14.29    0.94
   2  -4 -11   12.00    0.98
  -2  -4  11   13.56    1.00
  -2  -4  11   14.66    0.91
   2  -4 -11   12.50    1.08
   2  -4 -11   12.88    1.08
  -2  -4  11   13.46    0.99
  -2  -4  11   14.41    0.91
  -2  -4  10    0.03    0.24
   2  -4 -10   -0.04    0.27
   2  -4 -10   -0.05    0.27
  -2  -4  10    0.06    0.24
   2  -4 -10    0.33    0.23
  -2  -4  10    0.13    0.26
  -2  -4  10   -0.09    0.26
   2  -4 -10    0.11    0.28
   2  -4 -10   -0.18    0.35
   2  -4  -9   15.68    1.19
   2  -4  -9   16.84    1.17
  -2  -4   9   16.11    1.21
   2  -4  -9   15.85    1.17
  -2  -4   9   17.18    1.07
   2  -4  -9   16.04    1.35
   2  -4  -9   15.35    1.29
  -2  -4   9   17.63    1.20
  -2  -4   8   24.24    1.29
   2  -4  -8   19.80    1.26
  -2  -4   8   19.66    1.42
  -2  -4   8   26.24    1.43
   2  -4  -8   18.43    1.41
  -2  -4   8   20.46    1.21
  -2  -4   8   21.71    1.41
   2  -4  -8   18.99    1.42
   2  -4  -8   22.70    1.45
  -2  -4   8   21.50    1.29
   2  -4  -8   20.85    1.26
   2  -4  -8   21.53    1.62
   2  -4  -8   18.45    1.52
  -2  -4   7   10.10    0.74
   2  -4  -7    8.32    0.73
   2  -4  -7    9.36    0.86
  -2  -4   7    9.64    0.71
  -2  -4   7    9.27    0.85
  -2  -4   7   10.55    0.83
   2  -4  -7    7.75    0.85
   2  -4  -7    8.85    0.70
  -2  -4   7   11.21    0.77
   2  -4  -7    8.51    0.95
   2  -4  -7    7.97    0.71
   2  -4  -7    9.63    0.99
  -2  -4   7    7.98    0.79
  -2  -4   7    9.92    0.77
  -2  -4   6    0.63    0.25
   2  -4  -6    0.60    0.37
   2  -4  -6    0.47    0.24
   2  -4  -6    0.56    0.35
  -2  -4   6    0.62    0.29
  -2  -4   6    0.55    0.29
  -2  -4   6    0.63    0.32
   2  -4  -6    0.55    0.33
  -2  -4   6    0.66    0.31
   2  -4  -6    0.62    0.26
   2  -4  -6    1.45    0.38
  -2  -4   6    0.50    0.24
  -2  -4   6    0.63    0.25
   2  -4  -6    0.63    0.28
   2  -4  -6    0.39    0.38
  -2  -4   6    0.85    0.25
  -2  -4   5    4.09    0.47
  -2  -4   5    4.48    0.61
   2  -4  -5    3.51    0.67
  -2  -4   5    3.42    0.42
   2  -4  -5    3.56    0.71
   2  -4  -5    3.67    0.48
   2  -4  -5    5.13    0.85
  -2  -4   5    3.69    0.47
   2  -4  -5    4.02    0.64
   2  -4  -5    3.84    0.51
  -2  -4   5    2.56    0.40
   2  -4  -5    3.56    0.57
   2  -4  -5    3.56    0.56
  -2  -4   5    4.09    0.47
  -2  -4   5    3.92    0.51
  -2  -4   5    3.41    0.51
   2  -4  -5    3.28    0.56
  -2  -4   5    3.75    0.50
  -2  -4   5    3.08    0.40
  -2  -4   5    3.36    0.54
   2  -4  -5    4.19    0.53
  -2  -4   5    3.18    0.73
   2  -4  -5    3.01    0.47
   2  -4  -5    3.86    0.75
  -2  -4   4    3.00    0.40
   2  -4  -4    2.63    0.47
   2  -4  -4    2.59    0.60
   2  -4  -4    3.25    0.46
  -2  -4   4    2.21    0.35
   2  -4  -4    2.35    0.58
  -2  -4   4    3.81    0.58
  -2  -4   4    2.56    0.41
  -2  -4   4    2.61    0.55
   2  -4  -4    3.01    0.71
   2  -4  -4    1.93    0.49
   2  -4  -4    2.85    0.46
  -2  -4   4    2.47    0.41
   2  -4  -4    2.34    0.48
   2  -4  -4    2.71    0.49
  -2  -4   4    2.24    0.46
   2  -4  -4    2.69    0.51
  -2  -4   4    2.14    0.40
  -2  -4   4    2.34    0.44
  -2  -4   4    1.87    0.37
  -2  -4   4    2.66    0.55
  -2  -4   4    3.53    0.55
   2  -4  -4    2.72    0.44
   2  -4  -4    2.74    0.45
   2  -4  -4    3.28    0.68
  -2  -4   4    2.78    0.41
  -2  -4   4    3.14    0.69
   2  -4  -3   24.53    1.54
  -2  -4   3   22.57    1.42
  -2  -4   3   23.58    1.52
   2  -4  -3   20.96    1.57
  -2  -4   3   27.79    1.51
  -2  -4   3   26.22    1.86
   2  -4  -3   26.75    1.99
  -2  -4   3   24.01    1.42
  -2  -4   3   25.33    1.68
   2  -4  -3   23.55    1.72
  -2  -4   3   27.98    1.79
   2  -4  -3   22.55    1.75
   2  -4  -3   24.32    1.61
   2  -4  -3   21.64    2.02
  -2  -4   3   26.62    1.57
   2  -4  -3   22.98    1.62
  -2  -4   3   24.13    1.51
  -2  -4   3   21.41    1.44
  -2  -4   3   24.09    1.57
  -2  -4   3   25.33    1.64
  -2  -4   3   25.86    1.64
   2  -4  -3   23.29    1.58
  -2  -4   3   21.79    1.46
  -2  -4   3   31.32    1.83
   2  -4  -3   27.58    1.60
  -2  -4   3   25.26    1.53
  -2  -4   3   24.60    2.05
   2  -4  -3   27.35    2.15
   2  -4  -3   23.48    1.60
   2  -4  -2    6.53    0.67
  -2  -4   2    5.84    0.54
  -2  -4   2    6.22    0.62
   2  -4  -2    6.84    0.72
   2  -4  -2    5.36    0.91
  -2  -4   2    6.42    0.87
  -2  -4   2    5.30    0.53
   2  -4  -2    4.81    0.71
   2  -4  -2    7.06    0.79
  -2  -4   2    6.64    0.81
  -2  -4   2    5.78    0.73
  -2  -4   2    5.88    0.63
   2  -4  -2    5.02    0.90
   2  -4  -2    4.72    0.66
   2  -4  -2    6.70    0.73
  -2  -4   2    5.29    0.62
   2  -4  -2    7.21    0.75
  -2  -4   2    5.51    0.61
  -2  -4   2    6.40    0.70
  -2  -4   2    6.17    0.62
  -2  -4   2    7.16    0.82
   2  -4  -2    6.58    0.72
  -2  -4   2    5.62    0.69
   2  -4  -2    6.80    0.71
  -2  -4   2    6.76    0.65
   2  -4  -2    6.28    0.69
   2  -4  -2    6.07    0.94
   2  -4  -1   15.12    1.10
  -2  -4   1   13.96    0.92
  -2  -4   1   12.98    1.00
   2  -4  -1   14.30    1.14
   2  -4  -1   14.18    1.24
  -2  -4   1   16.61    1.29
   2  -4  -1   14.43    1.22
  -2  -4   1   13.33    0.91
   2  -4  -1   12.04    1.01
   2  -4  -1   12.50    1.38
  -2  -4   1   16.03    1.11
  -2  -4   1   13.68    1.05
  -2  -4   1   13.69    1.06
   2  -4  -1   16.69    1.18
   2  -4  -1   13.06    1.19
  -2  -4   1   15.57    1.14
  -2  -4   1   15.67    1.27
   2  -4  -1   15.29    1.18
  -2  -4   1   15.64    1.07
   2  -4  -1   13.91    1.08
  -2  -4   1   15.44    1.08
  -2  -4   0    0.25    0.34
   2  -4   0    0.30    0.18
   2  -4   0    0.26    0.27
   2  -4   0   -0.06    0.32
   2  -4   0    0.14    0.22
  -2  -4   0   -0.08    0.38
   2  -4   0    0.31    0.38
  -2  -4   0    0.48    0.30
   2  -4   0    0.54    0.33
  -2  -4   0   -0.09    0.26
   2  -4   0    0.17    0.31
   2  -4   0   -0.13    0.38
   2  -4   0    0.55    0.33
  -2  -4   0    0.47    0.31
  -2  -4   0   -0.09    0.29
   2  -4   0    0.55    0.34
  -2  -4   0    0.12    0.22
  -2  -4   0    0.14    0.25
  -2  -4   0   -0.05    0.29
   2  -4   0    0.30    0.32
  -2  -4   0    0.05    0.27
  -2  -4   0    0.15    0.21
  -2  -4   0    0.42    0.34
  -2  -4   0   -0.04    0.30
   2  -4   0   -0.23    0.32
   2  -4   0   -0.09    0.32
   2  -4   0    0.22    0.29
   2  -4   0    0.75    0.42
  -2  -4   0   -0.13    0.24
  -2  -4  -1   22.24    1.28
  -2  -4  -1   21.83    1.64
   2  -4   1   15.89    1.26
   2  -4   1   18.55    1.34
  -2  -4  -1   17.43    1.39
   2  -4   1   19.32    1.44
   2  -4   1   20.41    1.46
  -2  -4  -1   18.30    1.49
   2  -4   1   15.77    1.70
   2  -4   1   19.63    1.40
   2  -4   1   21.11    1.38
  -2  -4  -1   18.23    1.31
  -2  -4  -1   19.01    1.28
  -2  -4  -1   19.21    1.32
   2  -4   1   16.18    1.34
  -2  -4  -1   20.39    1.36
  -2  -4  -1   22.64    1.42
  -2  -4  -1   23.67    1.54
   2  -4   1   23.35    1.51
  -2  -4  -1   18.26    1.35
  -2  -4  -1   21.85    1.35
  -2  -4  -1   16.03    1.17
   2  -4   1   16.69    1.17
   2  -4   1   20.35    1.83
   2  -4   1   17.57    1.56
   2  -4   1   20.50    1.39
   2  -4   2   17.34    1.20
   2  -4   2   13.60    1.07
   2  -4   2   16.21    1.21
  -2  -4  -2   16.84    1.34
  -2  -4  -2   14.93    1.34
   2  -4   2   18.72    1.36
   2  -4   2   17.04    1.29
   2  -4   2   14.28    1.14
  -2  -4  -2   18.55    1.49
   2  -4   2   17.20    1.57
  -2  -4  -2   19.38    1.16
   2  -4   2   16.50    1.23
   2  -4   2   14.98    1.63
  -2  -4  -2   17.75    1.19
   2  -4   2   19.13    1.25
  -2  -4  -2   15.91    1.20
  -2  -4  -2   15.38    1.16
   2  -4   2   17.29    1.28
  -2  -4  -2   16.86    1.23
  -2  -4  -2   18.97    1.25
  -2  -4  -2   17.47    1.33
  -2  -4  -2   15.59    1.23
   2  -4   2   16.80    1.20
   2  -4   2   15.03    1.47
  -2  -4  -2   18.17    1.18
   2  -4   2   16.96    1.65
   2  -4   2   15.66    1.21
   2  -4   3    1.04    0.30
  -2  -4  -3    1.09    0.38
  -2  -4  -3    0.94    0.26
   2  -4   3    1.26    0.50
   2  -4   3    1.37    0.36
   2  -4   3    1.27    0.34
  -2  -4  -3    0.75    0.39
   2  -4   3    1.26    0.39
  -2  -4  -3    1.29    0.44
   2  -4   3    1.35    0.51
   2  -4   3    1.68    0.39
  -2  -4  -3    1.18    0.32
  -2  -4  -3    0.34    0.36
  -2  -4  -3    1.10    0.34
  -2  -4  -3    0.81    0.36
  -2  -4  -3    0.93    0.33
   2  -4   3    0.91    0.35
  -2  -4  -3    0.49    0.34
  -2  -4  -3    0.87    0.41
   2  -4   3    1.05    0.33
  -2  -4  -3    1.06    0.30
   2  -4   3    1.59    0.50
   2  -4   3    1.10    0.36
   2  -4   3    0.69    0.41
   2  -4   4   18.04    1.17
   2  -4   4   15.65    1.15
  -2  -4  -4   14.25    1.13
   2  -4   4   17.05    1.52
   2  -4   4   16.42    1.19
   2  -4   4   14.82    1.04
   2  -4   4   18.34    1.28
  -2  -4  -4   16.03    1.38
  -2  -4  -4   18.72    1.39
   2  -4   4   19.59    1.28
   2  -4   4   16.71    1.64
  -2  -4  -4   18.60    1.20
  -2  -4  -4   18.88    1.28
  -2  -4  -4   16.10    1.22
   2  -4   4   17.95    1.24
  -2  -4  -4   16.62    1.22
  -2  -4  -4   19.64    1.19
   2  -4   4   15.11    1.09
  -2  -4  -4   16.47    1.30
  -2  -4  -4   19.37    1.30
   2  -4   4   19.63    1.22
   2  -4   4   16.52    1.21
   2  -4   4   17.41    1.61
   2  -4   4   16.58    1.62
   2  -4   5   18.88    1.53
   2  -4   5   16.50    1.12
   2  -4   5   16.45    1.21
   2  -4   5   18.18    1.17
  -2  -4  -5   19.10    1.52
  -2  -4  -5   17.25    1.37
   2  -4   5   22.42    1.37
  -2  -4  -5   20.73    1.23
   2  -4   5   18.54    1.25
   2  -4   5   16.71    1.62
  -2  -4  -5   22.14    1.37
  -2  -4  -5   15.36    1.23
  -2  -4  -5   19.61    1.30
  -2  -4  -5   16.28    1.32
  -2  -4  -5   15.99    1.19
   2  -4   5   15.80    1.54
   2  -4   5   18.01    1.66
   2  -4   5   17.65    1.21
   2  -4   5   16.68    1.19
   2  -4   5   20.07    1.29
  -2  -4  -5   16.52    1.20
  -2  -4  -5   19.61    1.19
   2  -4   5   15.97    1.14
  -2  -4  -6    0.12    0.30
   2  -4   6   -0.14    0.23
  -2  -4  -6   -0.14    0.36
  -2  -4  -6   -0.15    0.31
  -2  -4  -6    0.35    0.34
  -2  -4  -6    0.27    0.32
   2  -4   6    0.22    0.28
   2  -4   6    0.54    0.26
   2  -4   6    0.11    0.22
  -2  -4  -6    0.29    0.20
   2  -4   6   -0.03    0.21
   2  -4   6    0.52    0.31
   2  -4   6    0.04    0.21
  -2  -4  -6    0.28    0.23
   2  -4   6    0.17    0.26
  -2  -4  -6    0.22    0.30
   2  -4   6    0.29    0.25
   2  -4   6    0.47    0.22
  -2  -4  -6    0.23    0.24
   2  -4   6    0.03    0.18
  -2  -4  -7    8.49    0.89
   2  -4   7    9.19    0.75
  -2  -4  -7    9.71    0.86
  -2  -4  -7    8.67    0.84
  -2  -4  -7    8.06    0.82
  -2  -4  -7    8.10    0.83
   2  -4   7   10.59    0.76
   2  -4   7   11.80    0.73
   2  -4   7   10.14    0.83
   2  -4   7    9.01    0.74
  -2  -4  -7   11.46    0.77
   2  -4   7   10.13    0.76
  -2  -4  -7   10.60    0.73
   2  -4   7    8.33    0.74
  -2  -4  -7    7.93    0.70
   2  -4   7   10.02    0.78
   2  -4   8   15.58    1.10
   2  -4   8   21.03    1.15
   2  -4   8   15.13    1.09
  -2  -4  -8   15.92    1.22
  -2  -4  -8   18.96    1.27
   2  -4   8   16.57    1.12
   2  -4   8   19.28    1.19
  -2  -4  -8   16.89    1.23
  -2  -4  -8   18.27    1.28
  -2  -4  -9    4.60    0.57
  -2  -4  -9    3.89    0.54
   2  -4   9    3.59    0.44
   2  -4   9    5.13    0.51
   2  -4   9    4.66    0.48
  -2  -4  -9    4.13    0.53
  -2  -4  -9    3.55    0.49
   2  -4   9    5.31    0.55
   2  -4   9    5.17    0.49
   2  -4  10   -0.31    0.20
  -2  -4 -10    0.04    0.23
  -2  -4 -10    0.15    0.24
   2  -4  10    0.10    0.20
  -2  -4 -10    0.20    0.20
   2  -4  10    0.03    0.21
   2  -4  10    0.12    0.19
  -2  -4 -11    8.08    0.67
  -2  -4 -11    8.14    0.71
   2  -4  11    7.24    0.60
   2  -4  11    8.25    0.64
   2  -4  11    8.66    0.63
   2  -4  11    8.11    0.63
  -2  -4 -12    2.24    0.37
  -2  -4 -12    1.93    0.30
   2  -4  12    2.23    0.30
   2  -4  12    2.24    0.31
   2  -4  12    1.94    0.29
  -2  -4 -13    0.23    0.14
   2  -4  13    0.39    0.16
  -2  -4 -13    0.45    0.24
   2  -4  13    0.57    0.16
  -2  -4 -14    1.73    0.28
   2  -4  14    2.13    0.19
   2  -5 -10    1.03    0.19
   2  -5 -10    1.09    0.19
   2  -5 -10    1.61    0.23
  -2  -5   9    2.05    0.24
  -2  -5   9    1.86    0.22
   2  -5  -9    1.46    0.26
   2  -5  -9    1.26    0.22
   2  -5  -9    1.97    0.29
  -2  -5   8    0.02    0.14
  -2  -5   8   -0.03    0.14
   2  -5  -8   -0.05    0.15
   2  -5  -8   -0.03    0.22
   2  -5  -8    0.05    0.18
   2  -5  -7   10.08    0.76
  -2  -5   7   10.12    0.74
   2  -5  -7    9.97    0.74
   2  -5  -7   12.25    0.80
  -2  -5   7   11.06    0.69
   2  -5  -7   10.63    0.81
   2  -5  -6    0.22    0.21
  -2  -5   6    0.17    0.19
   2  -5  -6   -0.16    0.18
   2  -5  -6    0.23    0.24
  -2  -5   6    0.14    0.20
  -2  -5   6    0.03    0.27
   2  -5  -6    0.58    0.30
  -2  -5   6    0.21    0.18
   2  -5  -6    0.02    0.19
   2  -5  -6   -0.04    0.24
   2  -5  -5    0.31    0.26
   2  -5  -5    0.19    0.20
   2  -5  -5   -0.07    0.24
  -2  -5   5    0.03    0.21
  -2  -5   5    0.03    0.27
   2  -5  -5    0.20    0.21
   2  -5  -5    0.34    0.19
  -2  -5   5   -0.07    0.20
   2  -5  -5    0.03    0.28
  -2  -5   5    0.02    0.15
   2  -5  -5    0.14    0.28
   2  -5  -4    1.54    0.33
   2  -5  -4    1.56    0.29
   2  -5  -4    1.81    0.37
  -2  -5   4    2.36    0.40
  -2  -5   4    1.92    0.34
  -2  -5   4    2.14    0.35
   2  -5  -4    1.26    0.35
   2  -5  -4    1.86    0.34
   2  -5  -4    2.15    0.34
  -2  -5   4    1.87    0.32
   2  -5  -4    1.67    0.41
   2  -5  -3    1.08    0.35
   2  -5  -3    0.55    0.32
  -2  -5   3    0.99    0.32
   2  -5  -3    1.24    0.28
   2  -5  -3    0.94    0.30
   2  -5  -3    0.75    0.30
   2  -5  -3    1.23    0.33
  -2  -5   3    1.38    0.33
   2  -5  -3    0.50    0.26
  -2  -5   3    1.04    0.27
   2  -5  -3    1.77    0.40
  -2  -5   2   52.34    2.64
   2  -5  -2   44.03    2.64
  -2  -5   2   59.02    2.87
   2  -5  -2   51.21    2.77
   2  -5  -2   51.28    2.81
   2  -5  -2   49.37    2.67
   2  -5  -2   49.39    2.68
  -2  -5   2   54.60    2.69
   2  -5  -2   48.74    2.60
  -2  -5   1   22.64    1.52
   2  -5  -1   24.28    1.36
   2  -5  -1   18.61    1.24
   2  -5  -1   22.33    1.50
   2  -5  -1   23.15    1.48
  -2  -5   1   21.84    1.31
  -2  -5   1   25.59    1.42
   2  -5  -1   21.87    1.46
  -2  -5   1   24.10    1.43
  -2  -5   1   23.56    1.37
   2  -5   0   29.51    1.71
  -2  -5   0   30.66    1.69
  -2  -5   0   28.26    1.78
   2  -5   0   27.68    1.61
   2  -5   0   26.95    1.75
  -2  -5   0   34.56    1.92
   2  -5   0   28.40    1.73
  -2  -5   0   30.26    1.69
  -2  -5   0   30.77    1.65
  -2  -5   0   27.31    1.61
   2  -5   0   27.49    1.67
   2  -5   0   23.85    1.53
  -2  -5  -1    2.66    0.56
   2  -5   1    2.30    0.42
  -2  -5  -1    1.96    0.46
   2  -5   1    1.29    0.29
   2  -5   1    2.87    0.47
  -2  -5  -1    2.75    0.41
   2  -5   1    2.20    0.39
  -2  -5  -1    2.45    0.40
   2  -5   1    2.16    0.41
  -2  -5  -2    0.21    0.31
   2  -5   2    0.11    0.26
  -2  -5  -2   -0.10    0.25
  -2  -5  -2   -0.09    0.32
   2  -5   2   -0.06    0.22
   2  -5   2   -0.06    0.21
   2  -5   2   -0.12    0.26
  -2  -5  -2    0.27    0.31
  -2  -5  -2   -0.10    0.25
   2  -5   2   -0.14    0.23
  -2  -5  -2    0.45    0.26
   2  -5   2    0.19    0.28
  -2  -5  -2   -0.07    0.25
   2  -5   3   17.21    1.11
  -2  -5  -3   19.32    1.12
  -2  -5  -3   16.65    1.11
  -2  -5  -3   14.63    1.14
   2  -5   3   16.25    1.04
   2  -5   3   18.76    1.19
  -2  -5  -3   16.34    1.19
  -2  -5  -3   15.94    1.26
   2  -5   3   18.21    1.11
   2  -5   3   16.24    1.04
  -2  -5  -3   16.34    1.08
  -2  -5  -3   17.86    1.07
   2  -5   3   17.72    1.15
  -2  -5  -4    3.11    0.45
  -2  -5  -4    3.16    0.47
  -2  -5  -4    4.06    0.51
   2  -5   4    4.02    0.43
   2  -5   4    5.50    0.48
  -2  -5  -4    4.00    0.58
   2  -5   4    3.80    0.46
  -2  -5  -4    3.91    0.42
  -2  -5  -4    4.46    0.42
   2  -5   4    4.11    0.37
   2  -5   4    3.84    0.42
  -2  -5  -5   12.43    0.95
  -2  -5  -5   12.39    0.94
  -2  -5  -5   14.21    1.11
  -2  -5  -5   13.17    0.99
   2  -5   5   13.40    0.86
   2  -5   5   15.06    0.92
   2  -5   5   15.79    0.93
   2  -5   5   16.08    0.96
   2  -5   5   15.23    0.90
  -2  -5  -5   15.15    0.89
  -2  -5  -6    0.11    0.17
  -2  -5  -6    0.09    0.20
   2  -5   6   -0.02    0.14
   2  -5   6    0.20    0.13
   2  -5   6   -0.09    0.19
   2  -5   6    0.04    0.18
   2  -5   6   -0.14    0.16
  -2  -5  -6    0.26    0.26
  -2  -5  -7    3.84    0.50
   2  -5   7    4.45    0.37
   2  -5   7    5.09    0.40
  -2  -5  -7    3.09    0.34
  -2  -5  -7    3.89    0.40
  -2  -5  -7    4.21    0.43
   2  -5   8   -0.13    0.14
   2  -5   8    0.08    0.15
  -2  -5  -8   -0.03    0.20
  -2  -5  -8   -0.25    0.21
  -2  -5  -9    6.23    0.58
  -2  -5  -9    7.24    0.52
   2  -5   9    7.75    0.48
  -2  -5 -10    0.59    0.13
   2  -5  10    0.58    0.11
  -3   0  20    3.06    0.26
   3   0 -20    2.80    0.27
   3   0 -19   -0.06    0.16
  -3   0  19   -0.02    0.14
   3   0 -19    0.11    0.17
  -3   0  18    0.91    0.22
   3   0 -18    1.34    0.32
  -3   0  18    0.86    0.22
   3   0 -18    0.52    0.29
  -3   0  17    0.10    0.19
   3   0 -17   -0.06    0.27
  -3   0  17    0.10    0.18
   3   0 -17    0.24    0.29
   3   0 -16    0.56    0.36
  -3   0  16    0.14    0.25
  -3   0  16    0.43    0.23
   3   0 -16    0.71    0.36
   3   0 -15   -0.06    0.34
   3   0 -15   -0.13    0.37
   3   0 -15    0.12    0.28
   3   0 -15    0.31    0.25
  -3   0  15    0.34    0.29
  -3   0  15    0.42    0.25
   3   0 -14    2.87    0.53
   3   0 -14    1.38    0.53
   3   0 -14    3.13    0.51
   3   0 -14    2.49    0.43
  -3   0  14    2.22    0.41
  -3   0  14    3.29    0.44
  -3   0  14    3.36    0.59
   3   0 -13   -0.12    0.40
  -3   0  13   -0.08    0.23
   3   0 -13   -0.09    0.25
   3   0 -13   -0.11    0.27
  -3   0  13    0.08    0.21
  -3   0  13   -0.05    0.20
   3   0 -12   86.87    5.20
   3   0 -12  100.37    4.78
  -3   0  12   91.04    4.60
   3   0 -12   91.66    4.66
  -3   0  12   95.48    4.68
   3   0 -11    0.09    0.36
  -3   0  11   -0.15    0.22
  -3   0  11    0.27    0.19
   3   0 -10  260.98   12.02
  -3   0  10  238.46   11.57
   3   0  -9   -0.07    0.29
  -3   0   9    0.08    0.14
  -3   0   8 1445.92   60.77
  -3   0   8 1525.48   60.95
   3   0  -8 1535.16   61.13
  -3   0   7    0.04    0.21
  -3   0   7    0.03    0.14
   3   0  -7    0.31    0.26
  -3   0   7    0.10    0.11
  -3   0   6  415.49   19.78
  -3   0   6  400.31   19.64
   3   0  -6  442.34   19.90
  -3   0   6  458.14   19.62
  -3   0   5   -0.03    0.12
  -3   0   5    0.17    0.09
   3   0  -5    0.11    0.15
  -3   0   5    0.02    0.08
  -3   0   4  228.28   10.65
   3   0  -4  246.58   10.73
  -3   0   4  224.21   10.53
  -3   0   3    0.14    0.11
  -3   0   3    0.51    0.09
   3   0  -2  895.19   40.71
   3   0  -1   -0.04    0.11
  -3   0   1    0.02    0.12
   3   0   0   42.74    2.16
  -3   0   0   43.23    2.19
  -3   0  -1    0.03    0.13
  -3   0  -2   30.01    1.65
  -3   0  -3    0.16    0.07
   3   0   3    0.06    0.12
   3   0   4  609.21   27.85
  -3   0  -4  654.21   27.76
  -3   0  -4  576.54   27.72
  -3   0  -5    0.30    0.12
   3   0   5    0.06    0.16
  -3   0  -5    0.17    0.10
  -3   0  -6  173.63    8.14
   3   0   6  177.75    8.23
  -3   0  -6  174.64    8.03
  -3   0  -6  169.67    8.12
  -3   0  -7    0.13    0.14
  -3   0  -7    0.03    0.18
   3   0   7    0.04    0.18
  -3   0  -7    0.17    0.10
  -3   0  -8  165.57    7.95
   3   0   8  177.87    8.07
  -3   0  -8  161.36    7.96
   3   0   9   -0.05    0.24
  -3   0  -9    0.32    0.20
  -3   0  -9    0.04    0.21
   3   0  10   48.71    2.74
  -3   0 -10   47.98    2.55
   3   0  10   48.23    2.58
  -3   0 -10   45.54    2.61
  -3   0 -11    0.04    0.23
   3   0  11   -0.06    0.24
   3   0  11   -0.04    0.21
  -3   0 -11    0.16    0.25
  -3   0 -12    2.16    0.40
   3   0  12    2.51    0.46
   3   0  12    1.15    0.35
  -3   0 -12    0.40    0.29
   3   0  13   -0.07    0.28
  -3   0 -13    0.43    0.32
  -3   0 -13    0.51    0.31
   3   0  13    0.05    0.22
  -3   0 -13    0.24    0.30
   3   0  14    2.92    0.55
  -3   0 -14    2.64    0.50
   3   0  14    4.02    0.55
  -3   0 -14    3.73    0.57
  -3   0 -14    3.26    0.57
  -3   0 -15   -0.06    0.32
  -3   0 -15    0.06    0.35
  -3   0 -15   -0.10    0.31
   3   0  15   -0.05    0.31
  -3   0 -16  169.72    8.83
  -3   0 -16  186.68    8.84
  -3   0 -16  179.65    8.77
   3   0  16  194.32    8.78
  -3   0 -17    0.04    0.29
  -3   0 -17    0.47    0.31
   3   0  17   -0.04    0.25
   3   0  17    0.11    0.17
  -3   0 -17    0.05    0.25
  -3   0 -18    3.51    0.42
  -3   0 -18    4.14    0.48
   3   0  18    3.75    0.42
  -3   0 -18    4.14    0.47
  -3   0 -19   -0.02    0.16
  -3   0 -19    0.02    0.13
   3   0  19   -0.12    0.16
  -3   0 -19   -0.08    0.14
  -3   0 -20    2.71    0.24
  -3  -1  20    0.09    0.10
  -3   1  20    0.06    0.08
   3  -1 -20    0.02    0.12
   3  -1 -20    0.13    0.17
  -3   1  20    0.04    0.09
  -3  -1  20    0.25    0.11
  -3   1  19    0.07    0.15
   3  -1 -19    0.16    0.24
  -3  -1  19    0.03    0.16
   3  -1 -19    0.09    0.19
  -3   1  19    0.27    0.16
   3  -1 -19    0.39    0.16
   3   1 -19    0.24    0.16
  -3  -1  19   -0.02    0.15
  -3   1  18    5.58    0.52
   3  -1 -18    5.85    0.60
  -3   1  18    6.29    0.54
  -3  -1  18    4.62    0.51
  -3  -1  18    5.34    0.46
   3   1 -18    5.42    0.57
   3  -1 -18    5.35    0.56
   3  -1 -18    7.03    0.72
   3   1 -17   10.18    0.92
   3  -1 -17   12.50    0.98
  -3  -1  17   11.62    0.83
   3  -1 -17   11.00    0.92
  -3   1  17   13.79    0.91
   3  -1 -17   13.08    1.01
   3   1 -17   10.35    0.82
   3  -1 -16   69.32    3.63
   3   1 -16   61.20    3.44
  -3   1  16   71.26    3.51
   3   1 -16   67.69    3.62
   3  -1 -16   67.61    3.62
  -3  -1  15  118.12    5.89
  -3   1  15  121.61    5.85
   3  -1 -15  115.56    6.67
   3  -1 -15  125.73    6.05
   3   1 -15  115.05    5.88
  -3  -1  15  112.78    5.71
   3  -1 -15  129.22    6.01
  -3   1  15  109.76    6.27
   3   1 -15  109.24    6.42
   3   1 -15  130.16    6.10
   3  -1 -15  126.28    6.07
  -3  -1  14   21.26    1.37
  -3   1  14   20.86    1.32
   3  -1 -14   21.38    1.93
  -3  -1  14   18.88    1.21
   3  -1 -14   21.37    1.49
   3   1 -14   18.06    1.33
   3  -1 -14   22.58    1.47
  -3   1  14   17.83    1.60
   3   1 -14   19.72    1.77
   3   1 -14   20.16    1.46
   3  -1 -14   21.33    1.48
  -3  -1  13   45.16    2.55
  -3   1  13   46.84    2.55
   3  -1 -13   42.20    3.16
  -3  -1  13   45.66    2.44
   3  -1 -13   49.34    2.72
   3   1 -13   47.55    2.59
   3  -1 -13   47.39    2.66
  -3   1  13   48.15    2.93
   3   1 -13   48.24    3.13
   3  -1 -13   49.03    3.23
   3  -1 -13   47.03    2.72
  -3  -1  12   27.88    1.97
  -3  -1  12   28.09    1.61
   3  -1 -12   29.58    1.84
  -3   1  12   30.58    1.71
  -3  -1  12   28.06    1.73
   3  -1 -12   30.90    2.32
   3  -1 -12   28.23    1.78
  -3   1  12   35.56    2.14
   3   1 -12   25.22    2.09
   3  -1 -12   28.22    2.22
  -3  -1  11   45.48    2.89
   3  -1 -11   49.86    2.74
  -3   1  11   48.31    2.61
  -3   1  11   52.50    2.67
  -3  -1  11   47.06    2.64
   3  -1 -11   52.85    2.76
  -3  -1  11   51.68    2.60
   3   1 -11   52.61    3.15
   3  -1 -11   45.94    3.14
  -3   1  11   50.31    2.95
   3  -1 -11   53.53    3.29
  -3   1  10   46.25    2.62
  -3  -1  10   39.22    2.56
   3   1 -10   46.02    2.77
   3  -1 -10   46.17    2.85
  -3   1   9  462.16   20.46
   3  -1  -9  428.52   20.62
   3   1  -9  459.66   20.60
  -3  -1   9  408.01   20.42
   3  -1  -8   97.15    4.92
   3   1  -8  104.87    4.88
  -3  -1   8   84.12    4.48
   3  -1  -8   89.22    4.50
  -3   1   8  110.69    4.79
   3  -1  -8   89.05    4.50
  -3  -1   8   96.94    4.77
   3  -1  -7   15.95    1.03
   3   1  -7   18.57    1.24
   3  -1  -7   16.80    1.27
  -3  -1   7   17.42    1.08
   3  -1  -7   16.49    1.07
  -3  -1   7   15.68    1.07
  -3   1   7   18.47    1.17
   3  -1  -7   15.18    1.05
  -3  -1   7   16.54    1.17
   3   1  -6   61.55    3.13
   3  -1  -6   61.71    3.18
  -3  -1   6   53.93    3.01
  -3   1   6   68.05    3.10
  -3  -1   6   59.22    3.06
   3  -1  -6   57.40    3.01
  -3  -1   6   56.45    3.09
  -3  -1   5    1.01    0.25
  -3  -1   5    0.92    0.23
  -3  -1   5    1.26    0.27
   3   1  -5    1.47    0.28
   3  -1  -5    0.92    0.25
  -3  -1   4  195.29    9.82
  -3   1   4  229.06    9.78
  -3  -1   4  204.19    9.85
  -3  -1   4  198.66    9.85
   3   1  -4  222.10    9.85
   3  -1  -4  208.46    9.84
  -3  -1   3  581.62   28.47
  -3  -1   3  599.45   28.49
   3  -1  -3  652.85   28.54
  -3   1   3  650.88   28.37
  -3  -1   3  605.99   28.49
   3  -1  -3  635.60   28.45
  -3  -1   2  261.25   12.36
   3  -1  -2  285.58   12.36
  -3   1   2  262.99   12.19
   3   1  -2  251.37   12.11
   3  -1  -2  276.31   12.12
  -3  -1   2  265.76   12.36
   3  -1  -2  282.80   12.29
   3  -1  -1    3.64    0.34
  -3  -1   1    4.01    0.40
  -3   1   1    3.02    0.23
  -3  -1   1    3.55    0.34
  -3  -1   1    4.00    0.40
   3  -1  -1    3.39    0.28
   3  -1   0 1008.44   47.61
  -3  -1   0 1031.26   47.74
  -3  -1   0 1038.62   47.69
  -3   1   0 1151.48   47.74
  -3  -1  -1  158.79    7.55
  -3   1  -1  165.12    7.53
  -3  -1  -1  156.58    7.52
  -3  -1  -2  847.89   39.29
  -3  -1  -2  858.43   39.26
  -3  -1  -2  878.95   39.31
  -3   1  -2  862.43   39.25
  -3  -1  -3  995.83   46.18
  -3   1  -3 1024.37   46.19
  -3  -1  -3 1022.50   46.17
  -3  -1  -4  179.59    8.22
  -3  -1  -4  186.22    8.17
  -3   1  -4  186.98    8.24
   3  -1   4  163.17    7.89
  -3  -1  -4  184.94    8.21
  -3  -1  -5    4.01    0.45
  -3  -1  -5    4.51    0.47
   3  -1   5    3.38    0.43
   3  -1   5    3.99    0.32
  -3   1  -6  672.77   29.75
  -3  -1  -6  669.43   29.76
  -3  -1  -6  673.34   29.83
   3  -1   6  631.41   29.86
  -3  -1  -6  656.83   29.97
  -3  -1  -6  662.28   29.86
   3   1   6  650.76   30.01
   3  -1   6  636.54   29.67
   3  -1   6  620.40   29.79
   3  -1   7    7.61    0.61
   3   1   7    8.85    0.81
   3  -1   7    7.83    0.58
  -3  -1  -7    7.57    0.62
   3  -1   7    7.72    0.64
   3  -1   7    8.46    0.65
  -3  -1  -7    7.16    0.73
  -3  -1  -7    8.04    0.65
  -3   1  -7    8.60    0.64
  -3  -1  -7    8.15    0.64
  -3  -1  -8   19.66    1.40
  -3   1  -8   19.98    1.23
  -3  -1  -8   19.65    1.24
   3  -1   8   18.22    1.17
   3   1   8   23.24    1.48
  -3  -1  -9   94.42    5.06
   3   1   9  102.85    5.12
   3  -1   9   98.47    4.80
  -3   1  -9   95.85    4.83
  -3  -1  -9   97.40    4.84
  -3   1 -10   33.80    1.93
  -3  -1 -10   30.35    1.91
  -3   1 -10   35.84    1.88
  -3  -1 -10   32.68    1.90
  -3  -1 -10   31.73    2.12
   3   1  10   35.15    2.17
   3  -1  10   28.92    1.85
   3  -1  10   39.38    1.99
   3   1  10   32.05    1.88
   3  -1  10   29.66    1.87
  -3   1 -11   45.71    2.49
  -3  -1 -11   41.77    2.49
  -3  -1 -11   42.21    2.45
  -3   1 -11   43.27    2.41
  -3  -1 -11   41.42    2.68
   3   1  11   44.64    2.74
   3   1  11   45.66    2.44
   3  -1  11   42.73    2.45
   3  -1  11   47.69    2.50
  -3   1 -12    7.27    0.71
  -3  -1 -12    7.44    0.75
  -3  -1 -12    6.50    0.72
   3   1  12    6.71    0.84
  -3  -1 -12    6.98    0.74
  -3   1 -12    6.11    0.70
   3  -1  12    6.82    0.60
   3  -1  12    7.62    0.72
   3   1  12    7.29    0.70
  -3  -1 -13   22.69    1.57
  -3   1 -13   24.92    1.53
  -3  -1 -13   23.58    1.59
  -3   1 -13   24.79    1.58
  -3  -1 -13   23.29    1.57
   3   1  13   21.15    1.74
   3  -1  13   20.26    1.34
   3  -1  13   23.20    1.50
   3   1  13   25.31    1.52
  -3   1 -14    2.64    0.46
  -3   1 -14    3.12    0.51
  -3  -1 -14    2.90    0.52
  -3  -1 -14    1.92    0.48
  -3   1 -14    2.25    0.46
  -3  -1 -14    3.27    0.52
   3   1  14    2.88    0.58
   3  -1  14    3.13    0.38
   3  -1  14    2.59    0.45
   3   1  14    3.60    0.49
  -3  -1 -14    2.68    0.55
  -3  -1 -15    0.71    0.34
  -3   1 -15    0.75    0.33
   3  -1  15    0.16    0.18
   3   1  15    0.51    0.28
   3  -1  15    0.81    0.33
  -3  -1 -15    0.13    0.30
  -3  -1 -15    0.32    0.33
  -3   1 -15    0.88    0.36
  -3  -1 -15    0.05    0.35
  -3   1 -15    0.43    0.31
  -3  -1 -16    1.86    0.44
   3   1  16    2.50    0.39
   3  -1  16    1.63    0.36
  -3   1 -16    1.37    0.33
  -3  -1 -16    2.00    0.45
  -3  -1 -16    1.84    0.42
  -3   1 -16    1.71    0.43
  -3   1 -16    1.71    0.37
  -3  -1 -16    1.57    0.38
  -3  -1 -17   49.19    2.67
  -3   1 -17   47.13    2.62
  -3  -1 -17   48.40    2.64
   3   1  17   51.37    2.57
   3  -1  17   52.58    2.60
   3   1  17   52.98    2.59
  -3   1 -17   42.85    2.50
  -3  -1 -17   50.50    2.65
  -3  -1 -17   49.25    2.66
  -3   1 -17   48.43    2.63
  -3  -1 -18   12.08    0.86
  -3   1 -18   12.37    0.84
  -3  -1 -18   13.23    0.89
  -3   1 -18   11.38    0.84
   3   1  18   13.17    0.81
   3   1  18   11.96    0.78
   3  -1  18   12.21    0.81
  -3  -1 -18   12.24    0.86
   3  -1  19   11.73    0.69
  -3  -1 -19   10.10    0.67
   3  -1  19   10.37    0.64
   3   1  19   10.25    0.61
  -3  -1 -19   10.13    0.68
  -3   1 -19    9.83    0.64
  -3  -2  19    3.70    0.30
  -3  -2  19    2.30    0.22
  -3  -2  19    3.15    0.30
   3  -2 -19    3.00    0.35
  -3   2  19    3.53    0.29
  -3   2  19    3.57    0.29
   3  -2 -19    3.30    0.33
  -3  -2  18    1.59    0.28
  -3  -2  18    1.19    0.21
   3  -2 -18    1.16    0.26
   3  -2 -18    1.15    0.30
  -3   2  18    1.60    0.26
  -3   2  18    1.15    0.22
  -3  -2  17    7.04    0.59
  -3  -2  17    6.94    0.64
   3  -2 -17    7.28    0.67
  -3   2  17    7.28    0.61
  -3   2  17    7.09    0.62
   3  -2 -17    7.87    0.75
  -3   2  16   15.46    1.02
  -3   2  16   15.14    1.00
   3  -2 -16   11.96    1.02
   3  -2 -16   12.94    1.05
   3  -2 -16   13.74    1.15
  -3  -2  16   14.79    1.00
  -3  -2  16   14.95    1.05
   3  -2 -16   12.02    0.91
   3  -2 -16   13.88    0.97
   3   2 -16   12.80    0.94
   3   2 -15   35.18    2.12
   3  -2 -15   37.64    2.16
   3  -2 -15   36.66    2.34
   3  -2 -15   38.36    2.30
  -3  -2  15   40.03    2.16
  -3  -2  15   38.01    2.20
   3  -2 -15   34.41    2.20
  -3   2  15   40.43    2.15
   3  -2 -14   47.12    3.46
  -3   2  14   59.12    2.84
   3  -2 -14   52.16    2.82
   3   2 -14   48.54    2.78
  -3  -2  14   48.72    2.57
   3  -2 -14   51.58    3.03
  -3   2  14   51.99    3.15
   3  -2 -14   51.63    3.01
  -3  -2  14   51.00    2.82
  -3  -2  14   53.09    2.88
   3  -2 -13  126.25    6.43
  -3   2  13  134.30    6.61
  -3  -2  13  127.25    5.98
   3  -2 -13  119.57    6.40
  -3  -2  13  111.74    6.59
  -3   2  13  137.18    6.19
  -3  -2  13  134.83    6.29
  -3  -2  13  121.32    6.19
   3  -2 -13  122.28    6.82
   3   2 -13  117.11    6.16
   3  -2 -13  128.38    6.21
   3  -2 -13  113.10    6.93
   3  -2 -12   81.10    4.24
   3  -2 -12   77.55    4.18
  -3  -2  12   69.73    4.35
  -3   2  12   79.21    3.94
  -3  -2  12   82.81    4.06
  -3  -2  12   72.80    3.94
   3  -2 -12   71.64    4.47
   3   2 -12   72.25    3.93
   3  -2 -12   75.78    3.96
  -3  -2  12   80.00    3.85
  -3  -2  12   79.12    3.91
  -3  -2  12   74.55    3.78
  -3   2  12   78.47    4.35
   3  -2 -12   71.07    4.68
  -3   2  11    5.56    0.59
  -3   2  11    6.32    0.81
   3  -2 -11    6.43    1.03
   3  -2 -11    6.35    0.94
   3   2 -11    5.47    0.59
   3  -2 -11    6.46    0.63
   3  -2 -11    6.53    0.79
  -3  -2  11    4.98    0.54
  -3  -2  11    5.94    0.60
  -3  -2  11    5.95    0.83
  -3  -2  11    5.17    0.52
  -3  -2  10    3.92    0.43
   3  -2 -10    2.89    0.62
   3  -2 -10    3.68    0.47
   3  -2 -10    4.03    0.59
  -3   2  10    4.39    0.49
  -3  -2  10    3.90    0.67
  -3  -2   9    9.28    0.70
   3  -2  -9    9.39    0.88
  -3  -2   9    7.85    0.97
   3  -2  -9    8.81    0.80
  -3  -2   9   10.34    0.83
  -3   2   9    9.77    0.73
  -3   2   9   10.69    0.97
   3   2  -9    8.48    0.86
   3  -2  -9    9.81    1.04
  -3  -2   9    9.99    0.74
   3  -2  -8  107.10    5.58
  -3  -2   8  111.37    5.84
  -3  -2   8  111.84    5.45
   3   2  -8  108.43    5.57
   3  -2  -8  118.37    5.82
  -3  -2   8   97.65    5.52
   3  -2  -8  109.78    5.53
   3  -2  -8  109.00    5.60
   3  -2  -7   13.64    1.13
  -3  -2   7   14.41    1.23
   3  -2  -7   13.24    1.11
   3  -2  -7   14.04    1.14
   3   2  -7   12.69    1.01
  -3   2   7   16.24    1.11
   3  -2  -7   13.98    1.30
   3  -2  -7   13.03    0.85
   3  -2  -7   15.26    1.12
  -3  -2   7   12.82    1.09
   3  -2  -7   13.21    0.84
  -3  -2   7   12.27    0.87
   3  -2  -6   20.16    1.46
   3  -2  -6   18.96    1.42
  -3  -2   6   19.43    1.46
   3   2  -6   16.99    1.20
   3  -2  -6   18.80    1.33
   3  -2  -6   20.86    1.57
  -3   2   6   20.82    1.30
   3  -2  -6   19.65    1.54
   3  -2  -6   18.63    1.10
   3  -2  -6   18.59    1.35
  -3  -2   6   17.83    1.35
  -3  -2   6   18.35    1.14
   3  -2  -6   17.83    1.09
   3  -2  -5    5.57    0.68
   3  -2  -5    5.50    0.67
  -3  -2   5    5.63    0.69
   3  -2  -5    4.42    0.52
   3  -2  -5    4.92    0.67
   3   2  -5    6.16    0.53
   3  -2  -5    5.70    0.71
  -3   2   5    6.67    0.57
  -3  -2   5    4.18    0.62
   3  -2  -5    3.89    0.41
   3  -2  -5    4.17    0.59
  -3  -2   5    5.20    0.65
  -3  -2   5    3.87    0.44
   3  -2  -5    5.08    0.45
   3  -2  -4   76.88    4.13
   3  -2  -4   78.86    4.13
  -3  -2   4   78.61    4.07
   3  -2  -4   72.68    3.80
   3   2  -4   73.42    3.76
   3  -2  -4   79.98    4.17
  -3   2   4   82.57    3.80
  -3  -2   4   71.03    4.05
   3  -2  -4   70.80    3.70
   3  -2  -4   76.86    4.09
   3  -2  -4   76.81    4.04
  -3  -2   4   84.45    3.90
  -3  -2   4   80.78    3.64
  -3  -2   4   73.17    4.03
   3  -2  -4   72.65    3.70
  -3  -2   4   72.22    3.74
   3  -2  -3  202.66    9.75
  -3  -2   3  206.77    9.65
   3  -2  -3  209.80    9.77
   3  -2  -3  191.51    9.30
   3   2  -3  190.42    9.32
   3  -2  -3  217.38    9.73
  -3   2   3  207.27    9.31
   3  -2  -3  202.28    9.64
  -3  -2   3  192.43    9.67
   3  -2  -3  184.58    9.29
  -3  -2   3  210.64    9.23
   3  -2  -3  199.16    9.64
  -3  -2   3  218.27    9.50
  -3  -2   3  193.31    9.63
   3  -2  -3  192.76    9.30
  -3  -2   3  196.43    9.34
   3  -2  -2  145.32    7.36
  -3  -2   2  167.24    7.24
   3  -2  -2  155.99    6.97
  -3  -2   2  155.14    7.26
   3  -2  -2  168.51    7.34
  -3   2   2  151.55    6.87
   3  -2  -2  136.61    6.84
   3  -2  -2  141.52    6.93
   3  -2  -2  148.43    7.21
  -3  -2   2  137.33    7.25
  -3  -2   2  156.45    6.86
   3  -2  -2  149.83    7.29
   3  -2  -2  140.91    6.93
  -3  -2   2  133.70    6.93
   3  -2  -1  137.50    6.25
  -3  -2   1  120.14    6.23
   3  -2  -1  114.99    5.88
  -3  -2   1  136.63    6.20
  -3  -2   1  120.36    6.18
   3  -2  -1  127.50    5.98
   3  -2  -1  127.89    6.26
  -3  -2   1  113.22    5.90
   3  -2  -1  135.28    5.91
   3  -2   0   29.47    1.87
   3  -2   0   30.08    1.75
  -3  -2   0   23.16    1.69
   3  -2   0   23.83    1.71
  -3  -2   0   31.30    1.66
  -3  -2   0   28.32    1.40
   3  -2   0   23.99    1.54
  -3  -2   0   25.40    1.65
  -3  -2   0   26.03    1.69
   3  -2   0   24.77    1.77
  -3  -2   0   25.69    1.71
   3  -2   0   25.24    1.44
   3  -2   1    7.64    0.62
   3  -2   1    8.90    0.62
  -3  -2  -1    7.41    0.62
   3  -2   1    8.87    0.64
  -3  -2  -1    8.12    0.60
  -3  -2  -1    8.81    0.75
  -3  -2  -1    9.92    0.59
   3  -2   1    8.84    0.90
   3  -2   1   10.20    0.79
  -3  -2  -1    8.21    0.84
   3  -2   1    8.26    0.88
   3  -2   2  147.28    7.30
  -3  -2  -2  151.59    7.34
   3  -2   2  148.75    7.30
  -3  -2  -2  150.60    7.65
   3  -2   2  153.71    7.31
   3  -2   2  154.45    7.65
  -3  -2  -2  179.31    7.53
  -3  -2  -2  167.47    7.24
  -3  -2  -2  151.18    7.35
   3  -2   2  148.76    7.70
   3  -2   2  157.20    7.57
  -3  -2  -2  159.87    7.65
   3  -2   2  155.69    7.79
  -3  -2  -3    0.94    0.25
   3  -2   3    0.24    0.20
   3  -2   3    0.52    0.23
  -3  -2  -3    1.18    0.40
  -3  -2  -3    0.92    0.20
  -3  -2  -3    1.77    0.37
  -3  -2  -3    1.43    0.27
   3  -2   3    0.58    0.38
   3  -2   3    0.49    0.24
  -3   2  -3    0.79    0.20
   3  -2   3    0.68    0.30
   3  -2   3    0.60    0.37
  -3  -2  -3    1.04    0.39
   3  -2   3    0.48    0.36
   3  -2   4  101.87    5.18
   3  -2   4   97.54    5.15
   3   2   4   99.92    5.11
   3  -2   4   95.26    4.73
  -3  -2  -4  104.76    5.16
   3  -2   4  103.42    5.10
  -3   2  -4   96.10    4.78
  -3  -2  -4  102.28    4.98
  -3  -2  -4  103.59    5.11
   3  -2   4   99.29    4.74
   3  -2   4   97.75    4.76
  -3  -2  -4   96.22    4.78
   3  -2   5   79.18    4.18
   3  -2   5   80.71    4.17
  -3  -2  -5   75.80    3.71
   3   2   5   80.04    4.17
   3  -2   5   74.08    3.73
  -3  -2  -5   80.30    4.14
  -3   2  -5   68.41    3.80
   3  -2   5   75.64    4.05
  -3  -2  -5   82.00    4.12
   3  -2   5   75.38    3.74
  -3  -2  -5   84.58    3.82
   3  -2   6    0.67    0.30
   3  -2   6    0.32    0.26
  -3  -2  -6    0.48    0.18
   3   2   6    0.57    0.33
   3  -2   6    0.34    0.17
  -3  -2  -6    0.47    0.27
   3  -2   6    0.27    0.28
   3  -2   6    0.22    0.18
  -3   2  -6    0.91    0.23
  -3  -2  -6    0.81    0.22
   3  -2   7   -0.12    0.20
   3   2   7    0.37    0.31
  -3  -2  -7    0.17    0.26
  -3  -2  -7    0.06    0.15
  -3   2  -7    0.05    0.15
   3  -2   7    0.16    0.16
   3  -2   7    0.05    0.20
   3  -2   7    0.13    0.20
  -3  -2  -8    3.45    0.45
  -3  -2  -8    4.26    0.50
  -3  -2  -8    4.15    0.45
  -3  -2  -8    4.45    0.70
   3  -2   8    4.16    0.52
   3   2   8    4.58    0.68
   3  -2   8    3.94    0.43
  -3  -2  -8    3.18    0.53
   3  -2   8    4.08    0.46
  -3   2  -9    7.45    0.59
  -3  -2  -9    5.82    0.59
   3  -2   9    7.50    0.70
   3  -2   9    6.88    0.59
   3   2   9    6.99    0.87
  -3  -2  -9    5.50    0.71
  -3  -2  -9    6.33    0.63
  -3  -2  -9    5.89    0.63
   3  -2   9    6.64    0.57
  -3   2  -9    5.92    0.55
  -3  -2  -9    5.59    0.57
  -3  -2  -9    5.78    0.85
  -3  -2 -10    7.06    0.71
  -3  -2 -10    7.64    0.71
  -3  -2 -10    7.51    0.69
  -3   2 -10    7.93    0.65
   3  -2  10    6.70    0.63
   3  -2  10    6.68    0.60
  -3  -2 -10    7.48    0.85
  -3  -2 -10    8.01    0.74
  -3   2 -10    7.44    0.63
  -3  -2 -10    6.96    0.68
  -3  -2 -10    8.72    1.03
  -3  -2 -11    2.02    0.49
   3  -2  11    1.61    0.58
  -3   2 -11    1.52    0.32
  -3  -2 -11    1.62    0.35
  -3  -2 -11    1.38    0.35
   3  -2  11    1.64    0.32
   3  -2  11    1.67    0.29
  -3  -2 -11    1.89    0.42
  -3  -2 -11    1.75    0.36
  -3   2 -11    1.61    0.32
   3  -2  11    1.38    0.30
  -3  -2 -12   30.18    1.99
   3  -2  12   28.90    1.66
   3  -2  12   28.69    1.69
   3  -2  12   31.57    1.63
  -3  -2 -12   28.57    1.74
  -3  -2 -12   26.43    1.76
  -3  -2 -12   28.33    1.76
  -3   2 -12   30.41    1.69
   3  -2  12   30.90    1.74
   3   2  12   24.86    1.61
   3  -2  12   34.79    2.52
  -3  -2 -12   29.31    1.77
  -3   2 -12   24.18    1.64
  -3  -2 -13  115.18    5.56
  -3   2 -13  100.17    5.44
   3  -2  13  121.31    6.41
  -3  -2 -13  111.17    5.57
   3  -2  13  117.82    5.48
   3  -2  13  119.43    5.36
   3  -2  13  105.37    5.38
   3   2  13  101.98    5.38
   3  -2  13  112.06    5.48
   3   2  13  118.84    6.05
  -3  -2 -13  118.00    5.64
  -3  -2 -13  118.26    5.83
  -3  -2 -14    0.09    0.25
  -3  -2 -14    0.15    0.35
  -3   2 -14    0.40    0.30
  -3  -2 -14    0.57    0.26
  -3   2 -14    0.26    0.22
   3  -2  14    0.31    0.18
   3  -2  14    0.07    0.22
   3   2  14    0.12    0.18
   3  -2  14    0.04    0.23
  -3  -2 -14    0.71    0.36
   3  -2  14    0.03    0.16
  -3  -2 -15    0.42    0.27
  -3   2 -15    0.24    0.22
  -3  -2 -15    0.45    0.32
   3   2  15    0.15    0.17
   3  -2  15    0.48    0.21
  -3  -2 -15    0.39    0.21
   3  -2  15    0.38    0.20
  -3  -2 -15    0.20    0.23
  -3  -2 -15    0.62    0.33
   3  -2  16    0.64    0.26
   3  -2  16    0.76    0.24
  -3  -2 -16    0.53    0.25
  -3   2 -16    0.48    0.22
  -3  -2 -16    0.56    0.21
  -3  -2 -16    0.78    0.31
   3  -2  16    0.37    0.19
  -3   2 -17    0.40    0.17
  -3  -2 -17    0.50    0.19
   3  -2  17    0.51    0.20
  -3  -2 -17    0.56    0.23
   3   2  17    0.29    0.19
   3  -2  17    0.42    0.18
   3  -2  18    1.40    0.22
   3  -2  18    1.50    0.20
   3   2  18    1.59    0.21
  -3  -2 -18    1.02    0.18
  -3  -3  18    7.19    0.43
  -3   3  17    8.36    0.54
  -3  -3  17    9.47    0.63
  -3  -3  17    9.20    0.58
  -3  -3  17   10.06    0.62
  -3   3  17    8.99    0.56
   3  -3 -17    9.03    0.66
  -3   3  16    0.13    0.14
   3  -3 -16    0.18    0.18
  -3  -3  16    0.12    0.19
  -3  -3  16    0.11    0.18
  -3  -3  16    0.05    0.16
   3  -3 -16    0.04    0.23
  -3   3  16   -0.02    0.12
   3  -3 -16    0.02    0.15
  -3   3  15    7.33    0.57
  -3  -3  15    7.71    0.67
  -3  -3  15    6.86    0.60
  -3  -3  15    6.75    0.59
  -3  -3  15    7.43    0.64
  -3  -3  15    6.99    0.49
   3  -3 -15    7.05    0.63
  -3   3  15    7.09    0.55
   3  -3 -15    6.35    0.60
   3  -3 -15    7.59    0.71
   3  -3 -15    7.57    0.69
  -3   3  14    9.66    0.73
  -3  -3  14   10.44    0.86
  -3  -3  14   10.64    0.80
  -3  -3  14   10.37    0.80
  -3  -3  14   10.12    0.67
  -3  -3  14   10.14    0.82
   3  -3 -14    8.93    0.80
  -3   3  14    8.86    0.70
   3  -3 -14    9.08    0.79
   3  -3 -14    9.04    0.89
   3  -3 -14    9.65    0.90
  -3   3  13   70.27    3.48
  -3  -3  13   72.07    3.65
  -3  -3  13   72.85    3.57
  -3  -3  13   72.70    3.42
  -3  -3  13   68.84    3.60
   3  -3 -13   64.34    3.57
  -3   3  13   66.23    3.43
   3  -3 -13   62.66    3.56
  -3  -3  13   67.91    3.57
   3  -3 -13   65.51    3.74
   3  -3 -13   67.80    3.74
  -3   3  12   14.46    1.01
  -3   3  12   13.63    0.97
   3  -3 -12   13.90    1.10
  -3  -3  12   14.22    1.15
   3  -3 -12   13.02    1.03
  -3  -3  12   16.03    1.11
  -3  -3  12   16.51    1.17
  -3  -3  12   16.53    1.01
   3  -3 -12   14.97    1.24
   3  -3 -12   13.25    1.26
  -3  -3  12   14.69    1.09
   3  -3 -12   14.35    1.13
  -3  -3  11    1.12    0.48
   3  -3 -11    0.53    0.43
  -3  -3  11    0.90    0.29
  -3  -3  11    0.51    0.30
   3  -3 -11    0.88    0.38
   3  -3 -11    0.54    0.31
   3  -3 -11    1.09    0.33
  -3  -3  11    0.70    0.32
  -3   3  11    0.38    0.24
   3  -3 -11    0.47    0.32
   3  -3 -11    1.00    0.33
  -3  -3  11    0.51    0.36
  -3  -3  11    1.35    0.37
  -3   3  11    0.45    0.25
   3  -3 -11    0.79    0.33
  -3   3  11    0.65    0.29
  -3  -3  10   61.69    3.03
  -3  -3  10   64.49    3.01
  -3  -3  10   60.51    3.09
  -3  -3  10   61.56    3.02
   3  -3 -10   51.58    3.11
  -3  -3  10   54.44    3.09
   3  -3 -10   62.26    3.11
  -3   3  10   53.28    2.96
  -3   3  10   58.27    2.95
   3  -3 -10   54.47    3.11
  -3  -3  10   52.31    3.59
   3  -3 -10   52.80    3.25
   3  -3 -10   56.66    3.39
  -3  -3  10   57.22    3.17
   3  -3 -10   49.00    3.53
  -3   3  10   56.06    3.29
   3  -3  -9   21.94    1.63
   3  -3  -9   22.72    1.74
  -3  -3   9   22.97    1.40
  -3  -3   9   22.06    1.92
   3  -3  -9   26.49    1.55
   3  -3  -9   22.04    1.54
  -3  -3   9   22.85    1.50
  -3   3   9   21.68    1.37
   3  -3  -9   20.08    1.48
  -3   3   9   20.91    1.32
   3  -3  -9   23.01    2.11
   3  -3  -9   21.12    1.86
  -3   3   9   22.62    1.62
  -3  -3   9   25.43    1.41
  -3  -3   9   25.02    1.42
  -3  -3   9   22.13    1.45
  -3  -3   8   32.76    2.42
   3  -3  -8   32.17    2.19
   3  -3  -8   29.91    1.76
   3  -3  -8   33.36    2.56
   3  -3  -8   30.01    2.33
  -3   3   8   33.47    2.05
   3  -3  -8   29.84    1.73
  -3  -3   8   32.21    1.81
  -3  -3   8   34.76    1.83
  -3  -3   8   32.78    1.88
  -3  -3   8   29.01    1.80
   3  -3  -8   34.22    2.13
   3  -3  -8   29.87    2.17
  -3   3   8   30.99    1.78
   3  -3  -8   28.81    1.91
  -3  -3   8   34.81    1.86
  -3  -3   8   40.40    1.95
   3  -3  -8   31.72    1.97
  -3  -3   8   28.41    1.89
   3  -3  -8   35.17    1.98
   3  -3  -7    0.39    0.24
   3  -3  -7   -0.12    0.35
   3  -3  -7   -0.10    0.28
   3  -3  -7    0.10    0.18
   3  -3  -7    0.31    0.32
  -3  -3   7   -0.11    0.23
  -3  -3   7    0.13    0.19
  -3  -3   7    0.23    0.19
  -3  -3   7   -0.06    0.20
   3  -3  -7    0.09    0.27
  -3  -3   7    0.03    0.18
   3  -3  -7    0.31    0.29
   3  -3  -7   -0.08    0.19
   3  -3  -7   -0.21    0.24
  -3  -3   7    0.27    0.21
   3  -3  -7    0.58    0.31
   3  -3  -7    0.49    0.27
  -3  -3   7    0.32    0.41
   3  -3  -7    0.09    0.27
   3  -3  -7    0.28    0.21
  -3  -3   7    0.03    0.17
  -3  -3   7    0.18    0.20
  -3  -3   7    1.16    0.38
  -3  -3   7   -0.04    0.23
  -3  -3   7   -0.04    0.23
  -3  -3   7   -0.14    0.25
   3  -3  -6  121.29    5.85
   3  -3  -6  118.02    6.59
   3  -3  -6  122.69    5.84
  -3  -3   6  117.00    5.92
  -3  -3   6  117.25    6.46
   3  -3  -6  107.78    5.88
   3  -3  -6  117.42    6.42
   3  -3  -6  122.21    6.32
  -3  -3   6  115.52    5.90
  -3  -3   6  129.46    5.80
  -3  -3   6  121.94    5.77
  -3  -3   6  118.89    5.90
  -3  -3   6  114.16    5.81
   3  -3  -6  118.87    6.08
   3  -3  -6  127.08    6.23
  -3  -3   6  128.78    5.83
   3  -3  -6  110.24    5.89
   3  -3  -6  120.53    6.46
   3  -3  -6  117.02    5.99
   3  -3  -6  133.90    6.01
   3  -3  -6  119.23    5.96
  -3  -3   6  112.89    5.89
  -3  -3   6  135.90    6.06
  -3  -3   6  107.30    5.80
   3  -3  -6  125.39    6.46
  -3  -3   6  127.47    5.80
  -3  -3   6  129.98    5.93
   3  -3  -5    9.35    1.10
  -3  -3   5   11.27    0.89
  -3  -3   5   11.73    0.83
  -3  -3   5   11.44    1.19
   3  -3  -5   11.43    1.21
  -3  -3   5   11.02    1.20
   3  -3  -5   10.41    0.89
   3  -3  -5   11.00    0.86
   3  -3  -5   10.94    1.15
  -3  -3   5   11.09    0.88
  -3  -3   5    9.60    0.84
  -3  -3   5   11.48    0.79
  -3  -3   5   11.23    0.76
   3  -3  -5   10.69    0.98
   3  -3  -5   10.43    1.01
  -3  -3   5   13.30    1.00
  -3  -3   5   13.04    0.87
   3  -3  -5    9.79    0.87
   3  -3  -5   13.27    1.32
  -3  -3   5   10.77    0.81
   3  -3  -5   13.59    0.98
   3  -3  -5   10.69    0.94
   3  -3  -5   11.93    0.92
  -3  -3   5   11.52    0.82
  -3  -3   5   12.01    0.91
   3  -3  -5   10.59    0.85
  -3  -3   5   12.55    0.99
  -3  -3   5   10.06    0.88
  -3  -3   5   10.57    0.83
  -3  -3   4   22.74    1.42
   3  -3  -4   21.39    1.34
  -3  -3   4   20.18    1.71
  -3  -3   4   21.07    1.26
  -3  -3   4   19.40    1.32
   3  -3  -4   23.82    1.87
  -3  -3   4   18.51    1.68
  -3  -3   4   22.25    1.29
   3  -3  -4   19.21    1.36
   3  -3  -4   20.92    1.71
  -3  -3   4   20.89    1.38
  -3  -3   4   20.88    1.22
  -3  -3   4   23.39    1.44
   3  -3  -4   21.75    1.54
   3  -3  -4   22.44    1.47
  -3  -3   4   20.55    1.29
   3  -3  -4   20.21    1.38
   3  -3  -4   20.64    1.78
   3  -3  -4   24.89    1.46
  -3  -3   4   17.96    1.26
   3  -3  -4   20.89    1.40
  -3  -3   4   19.78    1.36
  -3  -3   4   20.14    1.30
  -3  -3   4   21.34    1.43
  -3  -3   4   21.90    1.35
   3  -3  -4   22.06    1.70
   3  -3  -4   19.95    1.32
   3  -3  -3  141.54    7.00
   3  -3  -3  152.23    7.51
   3  -3  -3  132.83    6.85
  -3  -3   3  133.95    7.26
  -3  -3   3  136.01    6.72
   3  -3  -3  142.04    7.33
  -3  -3   3  137.02    6.82
  -3  -3   3  157.48    6.70
  -3  -3   3  157.37    7.14
   3  -3  -3  154.18    7.55
  -3  -3   3  148.61    6.77
   3  -3  -3  136.48    6.87
   3  -3  -3  155.57    6.89
  -3  -3   3  122.10    6.71
  -3  -3   3  151.73    6.96
  -3  -3   3  129.14    6.80
  -3  -3   3  125.84    6.73
   3  -3  -3  146.21    7.24
  -3  -3   3  140.47    6.78
  -3  -3   3  143.63    6.69
  -3  -3   3  127.94    7.24
  -3  -3   3  143.29    6.87
   3  -3  -3  139.94    6.79
   3  -3  -3  148.02    6.82
   3  -3  -2   55.34    2.80
  -3  -3   2   49.82    2.81
  -3  -3   2   49.81    2.73
   3  -3  -2   55.33    3.43
  -3  -3   2   54.51    2.75
   3  -3  -2   52.44    2.86
   3  -3  -2   56.54    2.85
  -3  -3   2   46.07    2.71
  -3  -3   2   49.16    2.74
  -3  -3   2   51.71    2.80
  -3  -3   2   52.70    2.81
  -3  -3   2   51.70    2.78
  -3  -3   2   51.36    2.79
   3  -3  -2   55.80    3.31
   3  -3  -2   54.06    3.37
  -3  -3   2   50.88    2.71
   3  -3  -2   52.89    2.86
   3  -3  -2   52.61    2.95
  -3  -3   2   51.97    2.84
   3  -3  -2   54.60    3.14
   3  -3  -2   55.60    2.81
  -3  -3   1    0.32    0.27
   3  -3  -1    0.43    0.27
  -3  -3   1    0.18    0.23
  -3  -3   1    0.17    0.17
  -3  -3   1    0.24    0.29
   3  -3  -1    0.22    0.20
   3  -3  -1    0.46    0.45
   3  -3  -1    0.89    0.32
  -3  -3   1    0.36    0.22
  -3  -3   1    0.20    0.24
   3  -3  -1    0.31    0.23
  -3  -3   1    0.49    0.22
  -3  -3   1    0.12    0.24
  -3  -3   1    0.40    0.23
  -3  -3   1    0.74    0.25
   3  -3  -1    0.31    0.25
   3  -3  -1    0.44    0.22
   3  -3  -1    0.95    0.30
  -3  -3   0    9.51    0.82
  -3  -3   0    7.64    0.82
   3  -3   0    8.95    1.13
  -3  -3   0    9.54    1.02
   3  -3   0   10.46    0.93
   3  -3   0    7.49    0.76
   3  -3   0    9.97    1.13
  -3  -3   0   13.04    1.07
  -3  -3   0    7.42    0.74
  -3  -3   0   10.81    0.72
   3  -3   0    9.56    0.83
   3  -3   0   12.38    1.28
   3  -3   0    9.81    0.80
  -3  -3   0    8.93    0.76
   3  -3   0   11.87    0.86
  -3  -3   0    9.55    0.81
  -3  -3   0    9.50    0.77
  -3  -3   0    9.25    0.85
   3  -3   0    9.58    0.81
  -3  -3   0   10.09    1.08
   3  -3   0    9.69    0.80
  -3  -3   0    8.47    0.75
   3  -3   0    9.08    0.84
  -3  -3   0    9.64    0.79
  -3  -3  -1  100.74    5.16
  -3  -3  -1  101.70    5.21
   3  -3   1  110.11    5.79
   3  -3   1  106.46    5.39
  -3  -3  -1  107.59    5.04
   3  -3   1   87.59    5.11
  -3  -3  -1  116.76    5.41
  -3  -3  -1   97.34    5.08
  -3  -3  -1  117.63    5.00
   3  -3   1  108.07    5.79
  -3  -3  -1  104.40    5.05
   3  -3   1  100.98    5.17
   3  -3   1  118.13    5.15
  -3  -3  -1   89.40    5.04
  -3  -3  -1   99.11    5.09
  -3  -3  -1   98.08    5.07
  -3  -3  -1  106.66    5.23
   3  -3   1  107.18    5.14
  -3  -3  -1   96.25    5.52
  -3  -3  -1   96.64    5.07
   3  -3   1   95.31    5.15
  -3  -3  -1  111.41    5.13
   3  -3   2   66.68    3.47
  -3  -3  -2   68.50    3.52
   3  -3   2   68.39    3.45
  -3  -3  -2   64.61    3.89
  -3  -3  -2   65.62    3.54
  -3  -3  -2   69.43    3.63
   3  -3   2   69.14    3.83
   3  -3   2   73.16    4.16
  -3  -3  -2   69.67    3.42
   3  -3   2   55.91    3.47
   3  -3   2   64.12    3.93
  -3  -3  -2   78.68    3.40
  -3  -3  -2   78.59    3.81
  -3  -3  -2   63.38    3.46
   3  -3   2   71.23    4.13
  -3  -3  -2   70.77    3.44
   3  -3   2   64.29    3.53
  -3  -3  -2   58.36    3.44
  -3  -3  -2   63.37    3.46
   3  -3   2   79.51    3.53
  -3  -3  -2   66.13    3.59
  -3  -3  -2   64.00    3.48
  -3  -3  -2   71.18    3.52
   3  -3   2   60.52    3.49
  -3  -3  -2   65.49    3.46
   3  -3   2   68.88    3.52
   3   3   2   67.70    3.80
   3  -3   2   67.79    3.47
   3  -3   3   21.52    1.40
   3  -3   3   22.98    1.42
  -3  -3  -3   24.55    1.48
  -3  -3  -3   23.51    1.39
  -3  -3  -3   23.92    1.81
   3  -3   3   22.30    1.78
  -3  -3  -3   22.12    1.43
   3  -3   3   23.09    1.48
   3  -3   3   26.56    1.99
  -3  -3  -3   23.01    1.36
   3  -3   3   21.65    1.72
   3  -3   3   21.28    1.44
  -3  -3  -3   22.43    1.57
  -3  -3  -3   20.16    1.46
   3  -3   3   22.25    1.88
  -3  -3  -3   24.35    1.40
   3  -3   3   21.63    1.46
  -3  -3  -3   19.41    1.40
  -3  -3  -3   22.15    1.43
  -3  -3  -3   24.35    1.47
  -3  -3  -3   24.21    1.46
  -3  -3  -3   22.00    1.51
  -3  -3  -3   21.01    1.37
   3  -3   3   21.66    1.44
  -3  -3  -3   25.74    1.50
   3   3   3   22.75    1.71
   3  -3   3   22.91    1.45
   3  -3   3   22.78    1.41
   3   3   4    2.57    0.55
  -3  -3  -4    3.73    0.54
  -3  -3  -4    3.36    0.65
  -3  -3  -4    3.35    0.39
   3  -3   4    3.23    0.46
   3  -3   4    5.21    0.77
   3  -3   4    3.78    0.71
   3  -3   4    3.68    0.46
   3  -3   4    3.38    0.45
   3  -3   4    3.83    0.65
   3  -3   4    2.98    0.42
  -3  -3  -4    3.60    0.50
   3  -3   4    2.93    0.43
  -3  -3  -4    3.68    0.48
   3  -3   4    3.04    0.45
  -3  -3  -4    4.10    0.43
   3  -3   4    3.38    0.71
  -3  -3  -4    2.80    0.50
  -3  -3  -4    3.72    0.48
  -3  -3  -4    3.35    0.45
  -3  -3  -4    4.33    0.52
   3  -3   4    2.27    0.37
  -3  -3  -4    2.70    0.39
   3  -3   4    3.31    0.43
   3  -3   4    3.28    0.43
   3   3   5    0.69    0.38
  -3  -3  -5    0.90    0.39
  -3  -3  -5    0.33    0.29
   3  -3   5    0.52    0.26
   3  -3   5    0.59    0.33
   3  -3   5    1.08    0.45
  -3  -3  -5    1.20    0.23
   3  -3   5    0.37    0.21
   3  -3   5    0.36    0.22
   3  -3   5    1.08    0.44
   3  -3   5    0.96    0.28
  -3  -3  -5    1.18    0.31
  -3  -3  -5    0.71    0.29
   3  -3   5    1.03    0.40
  -3  -3  -5    0.70    0.23
   3  -3   5    0.36    0.22
  -3  -3  -5    0.31    0.27
  -3  -3  -5    1.04    0.31
  -3  -3  -5    0.80    0.31
  -3  -3  -5    0.93    0.29
  -3  -3  -5    0.60    0.30
   3  -3   5    0.54    0.22
   3  -3   5    0.67    0.23
   3  -3   5    0.88    0.26
   3   3   6    1.16    0.44
  -3  -3  -6    2.20    0.44
   3  -3   6    2.23    0.38
   3  -3   6    2.23    0.35
   3  -3   6    0.82    0.40
   3  -3   6    1.17    0.47
  -3  -3  -6    2.39    0.32
   3  -3   6    2.65    0.55
   3  -3   6    2.00    0.34
   3  -3   6    1.70    0.35
  -3  -3  -6    2.13    0.41
  -3  -3  -6    2.22    0.34
   3  -3   6    1.98    0.38
  -3  -3  -6    1.58    0.42
   3  -3   6    2.41    0.56
  -3  -3  -6    3.04    0.46
  -3  -3  -6    2.15    0.41
  -3  -3  -6    2.09    0.42
  -3  -3  -6    1.85    0.35
   3  -3   6    2.37    0.39
   3  -3   6    2.44    0.35
   3  -3   6    2.28    0.36
   3  -3   7    6.69    0.55
   3   3   7    5.07    0.78
   3  -3   7    6.84    0.98
   3  -3   7    5.57    0.77
   3  -3   7    5.89    0.74
   3  -3   7    5.14    0.59
   3  -3   7    5.80    0.53
  -3  -3  -7    5.62    0.66
  -3  -3  -7    7.14    0.81
   3  -3   7    6.21    0.62
  -3  -3  -7    7.55    0.58
   3  -3   7    6.52    0.83
  -3  -3  -7    4.86    0.55
  -3  -3  -7    5.85    0.51
   3  -3   7    7.08    0.61
  -3  -3  -7    6.31    0.72
  -3  -3  -7    6.16    0.64
  -3  -3  -7    6.49    0.69
   3  -3   7    5.61    0.62
   3  -3   8   34.41    1.82
   3  -3   8   27.99    2.32
   3   3   8   32.64    2.24
  -3  -3  -8   28.22    2.03
  -3  -3  -8   25.12    1.80
  -3  -3  -8   33.67    1.85
  -3  -3  -8   30.26    1.87
  -3  -3  -8   27.58    1.75
   3  -3   8   32.12    1.80
  -3  -3  -8   30.14    1.94
   3  -3   8   26.75    1.77
   3  -3   8   36.41    1.95
  -3  -3  -9  103.41    5.18
   3  -3   9  103.24    5.66
   3   3   9  100.05    5.35
   3  -3   9   90.30    4.84
  -3  -3  -9  112.44    4.88
  -3  -3  -9   98.63    4.92
  -3  -3  -9   86.16    4.79
  -3  -3  -9   91.67    4.95
   3  -3   9  106.94    4.83
   3  -3   9   81.87    4.79
   3  -3   9   99.92    4.83
  -3  -3 -10   41.86    2.59
   3  -3  10   46.95    3.04
   3   3  10   40.42    2.71
   3  -3  10   40.48    2.28
  -3  -3 -10   39.10    2.31
  -3  -3 -10   37.86    2.25
  -3  -3 -10   38.94    2.37
   3  -3  10   40.96    2.26
   3  -3  10   44.97    2.24
   3  -3  10   34.69    2.23
   3  -3  11   21.75    1.43
   3  -3  11   27.47    1.43
   3  -3  11   27.80    2.15
  -3  -3 -11   24.34    1.72
   3   3  11   21.96    1.82
  -3  -3 -11   23.46    1.50
  -3  -3 -11   21.96    1.45
  -3  -3 -11   20.21    1.37
   3  -3  11   24.66    1.47
   3  -3  11   20.84    1.45
  -3  -3 -11   22.56    1.54
   3  -3  11   23.54    1.46
  -3  -3 -12   20.14    1.35
  -3  -3 -12   20.42    1.55
   3  -3  12   21.32    1.32
  -3  -3 -12   21.49    1.40
   3  -3  12   22.74    1.35
   3  -3  12   24.29    1.29
   3  -3  12   16.65    1.28
   3  -3  12   20.13    1.32
  -3  -3 -12   20.95    1.35
  -3  -3 -13   26.46    1.52
  -3   3 -13   22.70    1.45
   3  -3  13   29.98    1.57
   3  -3  13   29.54    1.48
   3  -3  13   19.67    1.48
   3  -3  13   28.15    1.51
  -3  -3 -13   28.30    1.80
   3  -3  13   26.94    1.54
   3  -3  13   27.45    1.61
  -3  -3 -13   24.03    1.54
   3  -3  14   -0.04    0.17
   3  -3  14    0.14    0.19
   3  -3  14    0.15    0.14
   3   3  14    0.03    0.16
  -3  -3 -14   -0.05    0.25
   3  -3  14    0.21    0.20
   3  -3  14   -0.07    0.23
   3  -3  14    0.25    0.17
   3  -3  15   -0.07    0.16
   3  -3  15    0.08    0.10
  -3  -3 -15   -0.07    0.20
   3   3  15    0.30    0.17
   3  -3  15    0.05    0.13
   3  -3  15   -0.06    0.18
  -3  -3 -16    0.15    0.16
   3  -3  16    0.06    0.13
   3   3  16    0.02    0.11
  -3  -3 -17    0.32    0.11
  -3  -4  15    6.34    0.43
   3  -4 -14    3.25    0.35
   3  -4 -14    2.92    0.32
  -3  -4  14    3.67    0.28
   3  -4 -14    2.96    0.32
   3  -4 -13   14.81    1.02
   3  -4 -13   14.20    0.99
   3  -4 -13   14.41    0.95
  -3  -4  13   15.88    0.87
  -3  -4  13   14.69    0.96
   3  -4 -12    5.76    0.62
   3  -4 -12    5.27    0.62
  -3  -4  12    6.37    0.61
   3  -4 -12    5.58    0.57
  -3  -4  12    6.45    0.58
  -3  -4  12    7.16    0.52
  -3  -4  11   29.37    1.68
  -3  -4  11   31.35    1.58
  -3  -4  11   26.36    1.69
   3  -4 -11   23.38    1.69
   3  -4 -11   25.90    1.80
   3  -4 -11   32.21    1.63
   3  -4 -11   25.82    1.67
  -3  -4  11   28.96    1.56
  -3  -4  10   38.20    2.17
  -3  -4  10   43.91    2.10
   3  -4 -10   37.88    2.36
   3  -4 -10   31.20    2.20
  -3  -4  10   36.36    2.20
   3  -4 -10   30.65    2.10
  -3  -4  10   44.77    2.08
   3  -4 -10   44.39    2.18
   3  -4 -10   35.20    2.17
  -3  -4   9    2.31    0.35
   3  -4  -9    2.02    0.45
   3  -4  -9    1.57    0.40
   3  -4  -9    1.42    0.41
  -3  -4   9    1.04    0.38
   3  -4  -9    1.60    0.39
  -3  -4   9    2.47    0.42
  -3  -4   8    1.71    0.39
   3  -4  -8    2.55    0.47
  -3  -4   8    1.02    0.33
   3  -4  -8    2.31    0.34
   3  -4  -8    1.24    0.38
  -3  -4   8    2.39    0.35
   3  -4  -8    1.22    0.27
  -3  -4   8    1.47    0.26
   3  -4  -8    1.77    0.43
   3  -4  -8    1.74    0.40
   3  -4  -7    2.38    0.50
   3  -4  -7    2.96    0.42
  -3  -4   7    3.70    0.43
   3  -4  -7    4.27    0.55
   3  -4  -7    3.00    0.53
  -3  -4   7    3.51    0.50
  -3  -4   7    2.99    0.50
   3  -4  -7    2.69    0.52
  -3  -4   7    4.88    0.55
  -3  -4   7    3.99    0.50
  -3  -4   7    3.26    0.42
   3  -4  -7    2.67    0.58
  -3  -4   7    2.93    0.39
   3  -4  -7    2.62    0.39
   3  -4  -7    2.86    0.41
  -3  -4   7    2.91    0.37
  -3  -4   7    2.89    0.70
   3  -4  -6    1.87    0.41
   3  -4  -6    1.64    0.35
  -3  -4   6    1.80    0.31
  -3  -4   6    2.17    0.36
   3  -4  -6    1.73    0.49
   3  -4  -6    1.30    0.42
   3  -4  -6    1.52    0.43
  -3  -4   6    1.76    0.34
   3  -4  -6    2.55    0.41
   3  -4  -6    1.53    0.42
   3  -4  -6    1.62    0.44
  -3  -4   6    1.90    0.39
   3  -4  -6    1.99    0.51
  -3  -4   6    1.73    0.41
  -3  -4   6    2.14    0.42
  -3  -4   6    1.97    0.53
  -3  -4   6    1.35    0.29
  -3  -4   6    1.70    0.41
   3  -4  -6    1.91    0.38
   3  -4  -6    2.26    0.47
   3  -4  -6    1.27    0.32
  -3  -4   6    2.11    0.35
   3  -4  -5   19.00    1.45
  -3  -4   5   20.80    1.40
  -3  -4   5   22.37    1.31
   3  -4  -5   22.07    1.76
  -3  -4   5   21.20    1.26
   3  -4  -5   20.21    1.35
   3  -4  -5   18.29    1.58
   3  -4  -5   19.33    1.51
  -3  -4   5   23.89    1.38
   3  -4  -5   19.40    1.40
   3  -4  -5   20.69    1.88
   3  -4  -5   23.21    1.49
  -3  -4   5   18.82    1.28
  -3  -4   5   20.61    1.45
   3  -4  -5   19.61    1.53
  -3  -4   5   24.19    1.35
  -3  -4   5   25.68    1.49
  -3  -4   5   17.30    1.26
  -3  -4   5   20.67    1.42
  -3  -4   5   24.12    1.61
   3  -4  -5   22.83    1.41
   3  -4  -5   19.72    1.80
   3  -4  -5   19.19    1.38
   3  -4  -4    7.43    0.81
  -3  -4   4    7.29    0.72
  -3  -4   4    7.70    0.66
   3  -4  -4    7.08    1.00
  -3  -4   4    7.58    0.61
   3  -4  -4    8.51    0.75
  -3  -4   4    9.52    0.90
   3  -4  -4    8.17    0.86
   3  -4  -4    6.73    0.88
  -3  -4   4    9.22    0.75
   3  -4  -4    8.21    0.80
   3  -4  -4    7.22    1.10
  -3  -4   4    6.13    0.66
   3  -4  -4    8.22    0.82
  -3  -4   4    9.05    0.73
  -3  -4   4    8.63    0.80
  -3  -4   4    8.54    0.82
  -3  -4   4    9.15    0.83
  -3  -4   4    7.04    0.67
   3  -4  -4    8.10    0.76
  -3  -4   4    7.24    1.10
   3  -4  -4    7.24    1.06
   3  -4  -4    7.68    0.78
   3  -4  -3   17.77    1.43
  -3  -4   3   20.00    1.37
  -3  -4   3   22.45    1.27
   3  -4  -3   23.40    1.84
  -3  -4   3   21.18    1.22
  -3  -4   3   22.90    1.59
   3  -4  -3   19.06    1.48
   3  -4  -3   20.20    1.60
   3  -4  -3   19.79    1.37
  -3  -4   3   22.91    1.39
   3  -4  -3   23.26    1.51
   3  -4  -3   17.63    1.82
  -3  -4   3   18.61    1.25
  -3  -4   3   19.15    1.32
   3  -4  -3   21.65    1.50
  -3  -4   3   20.53    1.45
  -3  -4   3   23.08    1.36
  -3  -4   3   18.09    1.30
  -3  -4   3   21.09    1.45
   3  -4  -3   22.55    1.44
   3  -4  -3   18.27    1.83
   3  -4  -3   20.04    1.45
   3  -4  -2    9.87    0.96
  -3  -4   2   10.31    0.85
  -3  -4   2   10.60    0.75
   3  -4  -2   10.06    1.03
   3  -4  -2   10.57    1.02
   3  -4  -2   10.68    0.92
   3  -4  -2    9.89    1.24
  -3  -4   2   12.46    0.92
   3  -4  -2   11.29    1.00
   3  -4  -2    9.89    1.33
  -3  -4   2    9.31    0.82
  -3  -4   2    9.59    0.86
   3  -4  -2   11.65    0.99
   3  -4  -2    8.66    0.98
  -3  -4   2    9.92    0.91
  -3  -4   2   11.87    0.88
  -3  -4   2   11.11    0.89
  -3  -4   2   10.88    1.05
   3  -4  -2   11.36    0.94
   3  -4  -2   10.25    0.95
   3  -4  -2   11.13    1.35
   3  -4  -1   10.43    1.23
   3  -4  -1    9.98    0.89
  -3  -4   1   10.53    0.85
  -3  -4   1    9.55    0.71
  -3  -4   1   11.08    0.97
   3  -4  -1    9.32    0.93
   3  -4  -1    9.51    0.99
  -3  -4   1   11.69    0.89
   3  -4  -1   13.09    1.00
  -3  -4   1    9.71    0.84
  -3  -4   1    9.10    0.85
  -3  -4   1    9.59    0.81
   3  -4  -1    9.72    0.99
  -3  -4   1   10.73    0.92
  -3  -4   1    9.83    0.87
  -3  -4   1   11.27    1.05
  -3  -4   1    9.91    0.86
   3  -4  -1   10.35    0.91
   3  -4  -1    8.79    0.89
   3  -4   0   19.08    1.77
   3  -4   0   17.45    1.32
   3  -4   0   21.08    1.38
  -3  -4   0   18.68    1.27
  -3  -4   0   18.15    1.12
   3  -4   0   15.88    1.16
  -3  -4   0   19.55    1.34
  -3  -4   0   18.39    1.32
   3  -4   0   27.32    1.52
   3  -4   0   18.81    1.44
  -3  -4   0   22.27    1.45
  -3  -4   0   19.75    1.34
  -3  -4   0   19.65    1.40
  -3  -4   0   21.16    1.54
  -3  -4   0   21.74    1.38
  -3  -4   0   21.03    1.48
   3  -4   0   21.55    1.47
   3  -4   0   20.35    1.49
   3  -4   0   20.15    1.45
   3  -4   0   17.95    1.84
   3  -4   0   21.15    1.43
   3  -4   0   18.17    1.82
   3  -4   0   20.26    1.43
   3  -4   1    0.69    0.34
  -3  -4  -1    1.22    0.45
   3  -4   1    0.80    0.25
   3  -4   1    0.71    0.33
  -3  -4  -1    0.94    0.40
   3  -4   1    1.40    0.40
   3  -4   1    1.36    0.57
   3  -4   1    1.25    0.38
  -3  -4  -1    1.06    0.37
   3  -4   1    0.69    0.37
  -3  -4  -1    0.24    0.34
  -3  -4  -1    0.69    0.25
  -3  -4  -1    0.93    0.38
   3  -4   1    0.60    0.39
  -3  -4  -1    0.42    0.27
  -3  -4  -1    1.04    0.35
  -3  -4  -1    0.96    0.37
  -3  -4  -1    0.63    0.36
   3  -4   1    1.19    0.39
   3  -4   1    1.03    0.52
   3  -4   1    1.29    0.42
   3  -4   2   98.02    4.65
   3  -4   2   75.64    4.40
   3  -4   2   86.65    5.07
   3  -4   2   78.99    4.50
   3  -4   2   91.31    4.54
  -3  -4  -2   92.86    4.70
   3  -4   2   90.13    4.64
   3  -4   2  109.00    4.75
  -3  -4  -2  100.71    4.56
   3  -4   2   89.75    4.63
   3  -4   2   86.86    5.29
  -3  -4  -2   85.37    4.55
  -3  -4  -2   81.70    4.45
  -3  -4  -2   89.39    4.52
   3  -4   2   84.18    4.61
  -3  -4  -2   95.32    4.50
  -3  -4  -2   90.36    4.60
  -3  -4  -2   87.62    4.71
  -3  -4  -2   94.78    4.59
   3  -4   2   95.70    4.58
   3  -4   2   85.88    5.25
   3  -4   2   81.08    4.86
   3  -4   2   90.10    4.62
   3   4   3   62.67    4.23
   3  -4   3   77.68    4.00
   3  -4   3   78.74    4.58
   3  -4   3   75.68    4.06
  -3  -4  -3   77.65    4.19
   3  -4   3   84.37    4.16
   3  -4   3   83.72    4.06
  -3  -4  -3   91.67    4.09
   3  -4   3   78.50    4.15
   3  -4   3   74.98    4.76
  -3  -4  -3   69.83    4.07
  -3  -4  -3   81.26    4.10
  -3  -4  -3   71.83    4.02
  -3  -4  -3   78.26    4.05
   3  -4   3   74.45    4.11
  -3  -4  -3   87.75    4.03
  -3  -4  -3   79.33    4.12
  -3  -4  -3   76.82    4.21
  -3  -4  -3   87.97    4.16
   3  -4   3   86.46    4.10
   3  -4   3   75.49    4.72
   3  -4   3   71.75    4.43
   3  -4   3   80.86    4.14
   3   4   4   34.09    2.58
   3  -4   4   42.08    2.37
   3  -4   4   42.93    2.85
   3  -4   4   46.08    2.39
   3  -4   4   47.51    2.50
  -3  -4  -4   41.98    2.52
  -3  -4  -4   51.28    2.43
   3  -4   4   41.91    2.44
   3  -4   4   40.05    2.96
  -3  -4  -4   37.59    2.41
  -3  -4  -4   42.59    2.45
  -3  -4  -4   37.77    2.37
   3  -4   4   41.75    2.43
  -3  -4  -4   47.71    2.36
  -3  -4  -4   40.43    2.35
  -3  -4  -4   45.87    2.47
  -3  -4  -4   40.84    2.54
   3  -4   4   40.78    2.81
   3  -4   4   41.54    2.95
   3  -4   4   43.79    2.46
   3  -4   4   45.98    2.40
   3   4   5    0.24    0.19
   3  -4   5    0.04    0.25
   3  -4   5    0.20    0.28
   3  -4   5    0.10    0.26
  -3  -4  -5    0.71    0.25
   3  -4   5    0.55    0.28
  -3  -4  -5    0.15    0.22
   3  -4   5   -0.05    0.25
  -3  -4  -5    0.24    0.33
  -3  -4  -5    0.05    0.24
  -3  -4  -5   -0.04    0.24
   3  -4   5   -0.17    0.25
  -3  -4  -5    0.42    0.32
   3  -4   5    0.09    0.27
   3  -4   5    0.19    0.25
   3  -4   5   -0.14    0.22
  -3  -4  -5   -0.22    0.29
   3  -4   5    0.27    0.27
   3  -4   5    0.09    0.24
  -3  -4  -5    0.30    0.32
   3  -4   5    0.19    0.23
   3  -4   6    0.73    0.25
   3  -4   6    0.74    0.25
  -3  -4  -6    1.03    0.38
  -3  -4  -6    0.45    0.34
  -3  -4  -6    1.40    0.36
  -3  -4  -6    0.69    0.31
   3  -4   6    1.16    0.30
   3  -4   6    1.96    0.44
  -3  -4  -6    1.10    0.26
  -3  -4  -6    0.88    0.30
   3  -4   6    0.57    0.29
  -3  -4  -6    0.45    0.35
  -3  -4  -6    0.92    0.44
   3  -4   6    0.74    0.26
   3  -4   6    1.18    0.29
  -3  -4  -6    0.72    0.22
  -3  -4  -7    1.10    0.41
   3  -4   7    0.72    0.24
   3  -4   7    0.51    0.21
   3  -4   7    0.71    0.24
  -3  -4  -7    0.63    0.20
  -3  -4  -7    0.24    0.26
   3  -4   7    0.60    0.29
   3  -4   7    0.46    0.22
  -3  -4  -7    0.81    0.31
  -3  -4  -7    0.71    0.38
  -3  -4  -7    1.02    0.38
   3  -4   7    0.81    0.28
  -3  -4  -7    0.79    0.33
   3  -4   7    0.87    0.24
  -3  -4  -8    4.28    0.55
  -3  -4  -8    5.20    0.59
  -3  -4  -8    4.29    0.51
  -3  -4  -8    3.78    0.56
   3  -4   8    4.34    0.49
   3  -4   8    5.88    0.56
  -3  -4  -8    4.47    0.66
  -3  -4  -9    0.84    0.29
  -3  -4  -9    0.42    0.29
  -3  -4  -9    0.47    0.27
   3  -4   9    0.22    0.23
   3  -4   9    0.13    0.23
   3  -4   9    0.55    0.23
  -3  -4  -9    0.18    0.32
  -3  -4 -10    0.36    0.22
  -3  -4 -10    0.33    0.25
  -3  -4 -10    0.11    0.21
   3  -4  10    0.52    0.24
   3  -4  10    0.36    0.21
   3  -4  10    0.39    0.19
  -3  -4 -10    0.50    0.31
  -3  -4 -11    0.86    0.27
  -3  -4 -11    0.96    0.27
   3  -4  11    0.72    0.23
  -3  -4 -11    0.68    0.21
   3  -4  11    0.96    0.24
   3  -4  11    0.89    0.23
  -3  -4 -11    1.34    0.36
  -3  -4 -12    0.15    0.18
  -3  -4 -12    0.32    0.18
  -3  -4 -12    0.58    0.25
   3  -4  12    0.57    0.18
   3  -4  12    0.64    0.18
   3  -4  12    0.46    0.18
  -3  -4 -13    5.07    0.50
  -3  -4 -13    4.95    0.44
  -3  -4 -13    4.14    0.35
   3  -4  13    5.79    0.39
   3  -4  13    5.20    0.38
   3  -4  13    5.84    0.42
  -3  -4 -14    0.03    0.11
  -3  -4 -14    0.34    0.13
   3  -5 -10    0.36    0.14
  -3  -5  10    0.03    0.11
  -3  -5  10    0.24    0.10
   3  -5 -10    0.13    0.11
  -3  -5   9    6.59    0.40
   3  -5  -9    5.22    0.43
  -3  -5   9    5.69    0.44
   3  -5  -8    0.15    0.18
   3  -5  -8   -0.12    0.15
  -3  -5   8   -0.02    0.18
  -3  -5   8    0.12    0.14
   3  -5  -8   -0.10    0.16
   3  -5  -7   19.21    1.30
   3  -5  -7   17.91    1.18
   3  -5  -7   19.97    1.22
  -3  -5   7   21.95    1.23
  -3  -5   7   22.94    1.13
   3  -5  -7   19.24    1.22
   3  -5  -6   21.21    1.35
   3  -5  -6   21.38    1.37
  -3  -5   6   23.72    1.37
   3  -5  -6   23.31    1.26
   3  -5  -6   22.18    1.46
   3  -5  -6   19.65    1.32
  -3  -5   6   25.28    1.25
   3  -5  -6   23.79    1.27
  -3  -5   5    8.76    0.61
   3  -5  -5    8.98    0.77
  -3  -5   5   11.05    0.70
  -3  -5   5   13.13    0.82
  -3  -5   5   10.46    0.78
   3  -5  -5    8.88    0.82
   3  -5  -5    8.38    0.72
   3  -5  -5    7.93    0.73
   3  -5  -5   10.85    0.72
   3  -5  -5    9.98    0.66
   3  -5  -5    8.23    0.66
   3  -5  -4    8.79    0.82
  -3  -5   4   11.17    0.74
  -3  -5   4   10.05    0.80
   3  -5  -4    9.74    0.81
   3  -5  -4   11.69    0.81
   3  -5  -4   10.26    0.73
   3  -5  -4    9.40    0.87
   3  -5  -4    9.31    0.79
   3  -5  -4   10.11    0.76
   3  -5  -3    0.15    0.23
   3  -5  -3    0.64    0.25
   3  -5  -3    0.31    0.26
   3  -5  -3    0.43    0.25
  -3  -5   3    0.36    0.24
   3  -5  -3   -0.05    0.29
   3  -5  -3    0.42    0.24
  -3  -5   2    0.48    0.37
   3  -5  -2    0.24    0.24
   3  -5  -2    0.57    0.21
   3  -5  -2    0.28    0.23
   3  -5  -2    0.48    0.29
  -3  -5   2    0.64    0.27
   3  -5  -2    0.26    0.29
  -3  -5   2    0.55    0.30
   3  -5  -2    0.50    0.32
  -3  -5   1   10.09    0.76
   3  -5  -1    6.88    0.72
  -3  -5   1    9.92    0.71
   3  -5  -1    7.94    0.66
   3  -5  -1    6.54    0.60
  -3  -5   1    9.23    0.74
   3  -5  -1    8.42    0.78
  -3  -5   1    6.76    0.78
  -3  -5   0   35.65    1.88
   3  -5   0   30.10    1.80
  -3  -5   0   33.78    1.95
   3  -5   0   25.75    1.62
  -3  -5   0   29.63    1.84
   3  -5   0   29.94    1.68
  -3  -5   0   28.24    1.65
   3  -5   0   28.61    1.72
   3  -5   0   29.52    1.78
  -3  -5   0   34.41    1.76
   3  -5   0   28.28    1.74
  -3  -5  -1   44.06    2.23
   3  -5   1   40.50    2.17
  -3  -5  -1   41.38    2.31
  -3  -5  -1   36.53    2.19
   3  -5   1   32.62    1.99
   3  -5   1   38.99    2.13
  -3  -5  -1   33.02    2.02
   3  -5   1   39.17    2.11
   3  -5   1   36.43    2.13
  -3  -5  -1   43.35    2.11
   3  -5   2    3.11    0.44
  -3  -5  -2    2.84    0.44
   3  -5   2    2.67    0.36
  -3  -5  -2    2.67    0.44
   3  -5   2    3.06    0.38
   3  -5   2    3.01    0.43
  -3  -5  -2    2.67    0.50
  -3  -5  -2    2.75    0.39
   3  -5   2    3.56    0.43
  -3  -5  -2    3.08    0.39
  -3  -5  -2    2.22    0.36
   3  -5   2    2.47    0.41
  -3  -5  -3    0.11    0.21
   3  -5   3    0.03    0.17
  -3  -5  -3   -0.04    0.25
   3  -5   3    0.08    0.17
   3  -5   3    0.33    0.23
  -3  -5  -3    0.03    0.21
   3  -5   3    0.06    0.19
  -3  -5  -3    0.03    0.19
  -3  -5  -3    0.16    0.17
   3  -5   3    0.07    0.20
  -3  -5  -4    0.83    0.28
   3  -5   4    1.05    0.24
  -3  -5  -4    0.65    0.26
  -3  -5  -4    0.26    0.27
   3  -5   4    0.86    0.22
   3  -5   4    0.82    0.22
  -3  -5  -4    0.67    0.22
   3  -5   4    0.65    0.23
   3  -5   4    0.56    0.23
   3  -5   5    0.16    0.17
  -3  -5  -5    0.39    0.23
  -3  -5  -5    0.33    0.21
   3  -5   5    0.54    0.19
   3  -5   5    0.36    0.19
  -3  -5  -5    0.39    0.24
   3  -5   5    0.31    0.15
   3  -5   5    0.26    0.18
  -3  -5  -6    4.69    0.50
   3  -5   6    6.99    0.51
   3  -5   6    7.13    0.47
   3  -5   6    4.97    0.44
   3  -5   6    6.99    0.45
   3  -5   6    6.18    0.47
   3  -5   7   11.34    0.66
  -3  -5  -7   10.47    0.72
  -3  -5  -8    4.99    0.43
   3  -5   8    5.29    0.38
  -3  -5  -9    0.58    0.16
  -3  -5  -9    0.48    0.18
   3  -5   9    0.52    0.12
   3  -5  10    0.15    0.08
   3  -5  10    0.28    0.07
  -3  -5 -10    0.32    0.10
   4   0 -20    6.83    0.58
  -4   0  19   -0.11    0.15
   4   0 -19    0.11    0.17
   4   0 -19    0.09    0.15
  -4   0  19   -0.04    0.11
   4   0 -18   68.76    3.58
  -4   0  18   66.99    3.35
   4   0 -18   64.59    3.45
  -4   0  18   69.52    3.38
  -4   0  18   71.26    3.41
   4   0 -17    0.05    0.26
   4   0 -17    0.33    0.27
  -4   0  17    0.26    0.19
  -4   0  17   -0.07    0.20
   4   0 -16   12.53    1.03
  -4   0  16   13.91    0.96
   4   0 -16   12.20    1.08
  -4   0  16   12.71    0.94
  -4   0  15    0.30    0.23
   4   0 -15    0.22    0.32
   4   0 -15    0.26    0.35
   4   0 -15   -0.13    0.39
  -4   0  14    2.04    0.36
  -4   0  14    1.79    0.39
   4   0 -14    1.23    0.40
   4   0 -14    1.78    0.60
  -4   0  13   -0.04    0.17
  -4   0  13    0.05    0.22
   4   0 -13    0.16    0.26
   4   0 -13    0.48    0.39
  -4   0  12  113.87    5.70
   4   0 -12  113.65    6.30
   4   0 -12  119.03    5.77
  -4   0  12  115.81    5.64
  -4   0  11    0.32    0.21
  -4   0  11    0.11    0.17
  -4   0  11   -0.07    0.26
   4   0 -11    0.09    0.20
   4   0 -11    0.69    0.40
  -4   0  10   24.38    1.73
   4   0 -10   28.16    1.95
  -4   0   9    0.11    0.25
   4   0  -9    0.08    0.32
  -4   0   8    3.92    0.39
   4   0  -8    4.54    0.65
  -4   0   8    4.32    0.39
  -4   0   7    0.09    0.23
  -4   0   7    0.02    0.11
   4   0  -7   -0.17    0.28
  -4   0   6  953.71   46.56
  -4   0   6  957.50   46.36
   4   0  -6 1082.32   46.72
  -4   0   6 1141.98   46.45
  -4   0   5    0.29    0.19
  -4   0   5    0.11    0.09
   4   0  -5    0.36    0.23
  -4   0   5    0.11    0.15
  -4   0   4  117.93    5.46
   4   0  -3    0.14    0.12
   4   0  -2  129.10    6.17
   4   0  -1    0.17    0.14
  -4   0   1    0.13    0.17
   4   0   0 1450.14   67.80
  -4   0   0 1542.62   67.84
  -4   0  -1    0.41    0.19
  -4   0  -2  863.62   39.46
   4   0   3    0.03    0.13
  -4   0  -3   12.96    0.76
   4   0   4   93.56    4.75
  -4   0  -4  102.61    4.71
   4   0   5    0.26    0.17
  -4   0  -5    0.23    0.16
  -4   0  -6   14.63    0.84
  -4   0  -6   11.66    0.76
   4   0   6   12.80    0.93
  -4   0  -6   14.42    0.89
  -4   0  -7    0.19    0.12
   4   0   7   -0.04    0.18
  -4   0  -7    0.03    0.17
   4   0   8  410.16   18.77
  -4   0  -8  398.92   18.67
   4   0   9   -0.05    0.24
  -4   0  -9    0.22    0.23
   4   0  10  192.97    9.40
  -4   0 -10  196.93    9.22
   4   0  10  194.83    9.26
   4   0  10  198.79    9.19
  -4   0 -10  185.46    9.30
  -4   0 -11    0.04    0.21
   4   0  11   -0.13    0.25
   4   0  11   -0.05    0.25
  -4   0 -11   -0.05    0.31
   4   0  12   69.95    3.74
  -4   0 -12   68.89    3.56
   4   0  12   67.63    3.56
  -4   0 -12   62.68    3.61
  -4   0 -13    0.05    0.30
   4   0  13    0.26    0.30
   4   0  13    0.68    0.28
  -4   0 -13    0.06    0.30
  -4   0 -14   52.26    2.89
   4   0  14   53.28    2.89
  -4   0 -14   50.31    2.97
  -4   0 -15    0.10    0.29
  -4   0 -15    0.23    0.26
   4   0  15    0.09    0.27
  -4   0 -16    0.30    0.26
  -4   0 -16    0.15    0.30
   4   0  16   -0.16    0.25
  -4   0 -16    0.05    0.32
  -4   0 -16    0.04    0.29
  -4   0 -17    0.30    0.24
  -4   0 -17   -0.16    0.31
  -4   0 -17    0.18    0.25
   4   0  17    0.03    0.25
   4   0  17   -0.02    0.15
  -4   0 -18   25.74    1.57
  -4   0 -18   27.68    1.58
  -4   0 -18   27.28    1.54
   4   0  18   30.41    1.55
   4   0  19    0.18    0.12
  -4   0 -19    0.02    0.14
  -4   0 -19   -0.08    0.11
   4  -1 -20    1.80    0.26
   4  -1 -20    1.93    0.21
  -4   1  20    2.06    0.20
  -4   1  20    1.97    0.19
  -4  -1  20    1.83    0.20
  -4   1  19    0.22    0.14
   4  -1 -19   -0.11    0.21
   4  -1 -19    0.42    0.19
  -4   1  19    0.02    0.15
   4  -1 -19    0.14    0.15
   4   1 -19    0.03    0.15
  -4  -1  19    0.33    0.16
  -4  -1  19    0.14    0.13
   4  -1 -18   14.53    1.11
  -4  -1  18   13.94    0.93
  -4  -1  18   15.39    0.98
   4   1 -18   14.40    1.02
   4  -1 -18   12.42    0.98
  -4   1  18   13.81    0.94
  -4   1  18   14.79    0.95
   4  -1 -18   14.72    1.03
   4  -1 -17   10.73    0.89
  -4   1  17   10.48    0.81
   4  -1 -17   10.15    0.87
  -4  -1  17    8.70    0.69
   4   1 -17   10.41    0.87
   4  -1 -17    8.65    0.82
  -4  -1  17   10.00    0.80
  -4   1  17   10.37    0.80
  -4   1  16   18.85    1.24
   4   1 -16   18.70    1.33
   4  -1 -16   16.69    1.28
  -4  -1  16   17.23    1.15
   4  -1 -16   18.39    1.33
   4   1 -15   13.85    1.45
   4  -1 -15   13.09    1.51
   4  -1 -15   18.30    1.30
   4   1 -15   17.58    1.30
   4  -1 -15   15.52    1.70
  -4   1  15   16.54    1.44
  -4  -1  15   15.91    1.03
   4  -1 -15   16.94    1.26
  -4  -1  15   15.80    1.10
   4   1 -14   57.07    3.86
   4  -1 -14   60.45    3.99
   4  -1 -14   70.66    3.56
   4  -1 -14   61.90    4.07
  -4   1  14   65.62    3.77
   4  -1 -14   70.26    3.55
  -4  -1  14   61.18    3.21
  -4  -1  14   60.94    3.29
  -4   1  13   30.89    2.04
   4  -1 -13   27.32    1.76
  -4  -1  13   24.46    1.51
   4  -1 -13   23.04    2.16
  -4   1  13   26.90    1.60
  -4  -1  13   26.90    1.64
   4   1 -13   25.30    2.08
   4  -1 -13   27.22    2.21
  -4   1  12   84.07    4.22
  -4  -1  12   79.95    4.23
   4  -1 -12   88.18    4.36
   4  -1 -12   81.97    4.94
  -4   1  12   89.46    4.28
   4  -1 -12   85.14    4.37
  -4  -1  12   82.13    4.14
  -4   1  12   85.00    4.62
   4   1 -12   78.41    4.76
   4  -1 -12   85.37    4.94
  -4  -1  11   13.10    1.12
  -4   1  11   11.92    0.91
  -4  -1  11   12.67    0.94
   4  -1 -11   12.47    1.01
   4  -1 -11   13.70    1.41
  -4   1  11   13.32    1.19
  -4  -1  11   14.91    0.90
   4  -1 -11   13.40    1.04
  -4   1  11   12.91    0.95
   4   1 -11   13.62    1.30
   4  -1 -11   12.00    1.30
   4  -1 -10   22.09    1.72
   4   1 -10   21.25    1.66
  -4  -1  10   19.40    1.28
  -4   1  10   21.31    1.31
   4  -1 -10   20.18    1.36
  -4   1  10   23.57    1.58
  -4  -1  10   21.33    1.51
  -4   1   9   25.82    1.65
   4  -1  -9   24.97    1.80
   4   1  -9   25.79    1.78
  -4  -1   9   21.01    1.56
   4  -1  -8  432.07   20.12
   4   1  -8  493.23   20.51
   4  -1  -8  481.17   20.57
  -4  -1   8  420.98   20.14
   4  -1  -8  408.70   20.15
  -4  -1   8  412.59   20.16
  -4   1   8  503.44   20.36
  -4  -1   8  446.27   20.33
   4  -1  -8  409.51   20.15
   4   1  -7   43.55    2.42
   4  -1  -7   45.41    2.48
  -4  -1   7   37.02    2.21
  -4   1   7   45.65    2.31
  -4  -1   7   41.37    2.29
   4  -1  -7   38.77    2.22
  -4  -1   7   37.25    2.28
  -4  -1   6   16.25    1.12
  -4   1   6   16.71    1.10
  -4  -1   6   15.66    1.12
  -4  -1   6   16.69    1.16
   4   1  -6   19.75    1.25
   4  -1  -6   16.84    1.21
  -4  -1   5    6.91    0.65
  -4   1   5    7.27    0.59
  -4  -1   5    7.78    0.68
  -4  -1   5    6.98    0.64
   4  -1  -5    8.17    0.70
   4   1  -5    7.00    0.66
  -4  -1   4  110.37    5.40
   4  -1  -4  123.95    5.65
   4   1  -4  104.87    5.25
  -4   1   4  113.21    5.29
  -4  -1   4  112.71    5.42
  -4  -1   4  105.11    5.39
   4  -1  -4  114.87    5.42
  -4  -1   3  138.62    6.72
  -4  -1   3  141.98    6.73
   4  -1  -3  150.14    6.75
  -4   1   3  137.39    6.56
   4   1  -3  129.34    6.51
   4  -1  -3  149.72    6.92
  -4  -1   3  141.71    6.72
   4  -1  -3  154.31    6.71
   4  -1  -2   92.19    4.02
  -4  -1   2   84.62    4.06
   4  -1  -2   93.87    4.21
  -4   1   2   79.36    3.83
   4   1  -2   87.59    3.82
  -4  -1   2   86.54    4.06
   4  -1  -2   76.13    3.72
   4  -1  -1   30.25    1.77
   4  -1  -1   29.11    1.55
  -4  -1   1   26.80    1.63
  -4  -1   1   30.13    1.65
   4  -1   0  156.15    7.62
  -4  -1   0  170.54    7.82
  -4   1   0  179.89    7.86
  -4   1  -1  885.86   40.12
  -4  -1  -1  872.44   40.11
  -4  -1  -2 1139.46   54.00
  -4  -1  -2 1207.17   54.01
  -4   1  -2 1191.58   54.02
  -4  -1  -2 1211.31   54.06
  -4  -1  -3  124.26    6.34
  -4  -1  -3  131.83    6.36
  -4  -1  -3  138.68    6.47
  -4   1  -3  135.70    6.42
  -4  -1  -4  199.41    7.03
  -4   1  -4  202.71    7.16
   4   1   4  196.18    7.14
  -4  -1  -4  193.39    7.04
  -4  -1  -5    8.77    0.71
  -4   1  -5    8.47    0.60
  -4  -1  -5    7.48    0.61
   4   1   5    9.18    0.82
   4  -1   5    7.77    0.47
  -4  -1  -5    7.12    0.68
  -4  -1  -6  242.56   11.13
  -4   1  -6  236.95   11.02
  -4  -1  -6  237.40   11.04
  -4  -1  -6  253.73   11.22
  -4   1  -6  242.46   11.36
   4  -1   6  229.42   11.11
   4   1   6  248.11   11.33
   4  -1   6  224.60   10.88
  -4  -1  -6  245.45   11.18
   4   1   7  201.08    9.09
   4  -1   7  178.16    8.63
  -4  -1  -7  191.54    8.82
   4  -1   7  177.46    8.85
  -4   1  -7  190.74    8.76
  -4  -1  -7  198.23    8.80
  -4  -1  -7  188.77    8.94
  -4  -1  -7  188.85    8.85
   4  -1   7  172.65    8.77
  -4   1  -8   14.09    0.98
  -4  -1  -8   12.92    1.08
  -4  -1  -8   15.16    1.02
   4   1   8   14.32    1.19
   4   1   9   17.17    1.18
   4  -1   9   16.80    1.18
   4  -1   9   19.91    1.26
  -4   1  -9   17.78    1.20
  -4  -1  -9   20.20    1.26
  -4  -1  -9   17.16    1.33
   4   1   9   18.45    1.42
  -4   1  -9   19.46    1.17
  -4  -1  -9   17.66    1.18
  -4  -1  -9   17.33    1.16
   4  -1  10   13.38    1.01
   4   1  10   13.94    1.01
   4  -1  10   12.29    0.99
  -4   1 -10   13.38    1.01
  -4  -1 -10   12.49    1.01
   4   1  10   13.39    1.19
  -4  -1 -10   12.23    0.96
  -4   1 -10   13.75    0.96
  -4  -1 -10   13.32    0.97
   4  -1  11   17.19    1.17
   4   1  11   14.86    1.11
   4  -1  11   15.27    1.13
  -4   1 -11   14.87    1.14
  -4  -1 -11   15.70    1.19
   4   1  11   16.18    1.36
  -4  -1 -11   14.62    1.12
  -4   1 -11   15.73    1.11
   4   1  12    0.65    0.34
   4   1  12    1.32    0.33
   4  -1  12    0.69    0.30
  -4   1 -12    1.36    0.36
  -4  -1 -12    0.79    0.31
  -4  -1 -12    0.76    0.31
  -4   1 -12    1.16    0.31
  -4   1 -12    0.36    0.37
  -4  -1 -12    0.61    0.34
   4  -1  12    1.10    0.25
   4   1  13   -0.08    0.33
   4  -1  13    0.74    0.31
   4   1  13    0.57    0.28
  -4   1 -13    0.17    0.23
  -4  -1 -13    1.09    0.38
  -4  -1 -13    0.90    0.35
  -4   1 -13    0.37    0.29
  -4   1 -13   -0.12    0.33
  -4  -1 -13    0.25    0.31
   4  -1  13    0.35    0.19
   4   1  14   32.40    2.27
  -4  -1 -14   38.53    2.16
  -4  -1 -14   36.36    2.11
  -4   1 -14   36.71    2.05
  -4   1 -14   35.62    2.11
  -4  -1 -14   34.08    2.10
  -4   1 -14   26.58    2.43
  -4  -1 -14   32.75    2.12
   4  -1  14   31.80    1.85
   4  -1  14   37.66    2.07
   4   1  14   34.86    2.03
  -4  -1 -15   20.25    1.48
  -4   1 -15   22.08    1.50
  -4  -1 -15   20.39    1.49
   4   1  15   22.42    1.41
   4  -1  15   24.59    1.48
  -4  -1 -15   24.29    1.55
  -4  -1 -15   23.21    1.51
  -4   1 -15   25.88    1.57
  -4   1 -15   23.08    1.44
   4  -1  15   20.42    1.25
   4  -1  16    2.90    0.40
   4   1  16    1.78    0.34
  -4  -1 -16    1.89    0.39
  -4  -1 -16    1.94    0.42
  -4   1 -16    2.38    0.44
  -4  -1 -16    1.51    0.40
  -4   1 -16    1.79    0.35
  -4  -1 -16    2.35    0.41
  -4   1 -16    2.53    0.42
  -4   1 -17    2.00    0.38
  -4  -1 -17    2.61    0.39
  -4  -1 -17    3.37    0.44
  -4   1 -17    2.52    0.34
  -4  -1 -17    3.26    0.42
  -4   1 -17    2.23    0.36
   4   1  17    2.65    0.36
   4  -1  17    3.04    0.37
  -4  -1 -18    0.52    0.21
  -4   1 -18    0.13    0.21
  -4   1 -18    0.33    0.13
  -4  -1 -18    0.65    0.22
  -4  -1 -18    0.26    0.16
   4   1  18    0.24    0.15
   4  -1  18    0.51    0.18
   4   1  18    0.71    0.18
   4   1  19    5.17    0.35
  -4  -1 -19    5.78    0.41
  -4   1 -19    5.62    0.40
   4  -1  19    6.43    0.40
  -4  -2  19    1.09    0.16
  -4   2  19    1.17    0.18
   4  -2 -19    1.51    0.22
   4  -2 -19    0.88    0.19
  -4  -2  19    1.55    0.20
  -4  -2  19    1.52    0.19
  -4   2  18    0.63    0.19
   4  -2 -18    0.51    0.22
  -4  -2  18    0.46    0.16
  -4  -2  18    0.46    0.15
  -4   2  18    0.72    0.19
  -4  -2  18    0.68    0.20
   4  -2 -18    0.65    0.22
  -4  -2  18    0.79    0.22
  -4  -2  17   21.63    1.32
  -4  -2  17   23.56    1.39
  -4   2  17   24.94    1.38
   4  -2 -17   20.61    1.40
   4  -2 -17   22.30    1.47
   4  -2 -17   24.41    1.45
  -4   2  17   24.09    1.36
   4  -2 -16    0.80    0.34
  -4  -2  16    1.06    0.27
  -4  -2  16    1.23    0.32
  -4   2  16    1.17    0.31
   4   2 -16    0.94    0.27
   4  -2 -16    1.14    0.26
  -4   2  16    1.29    0.32
   4  -2 -16    0.50    0.32
   4  -2 -16    1.13    0.36
   4  -2 -15   10.95    0.96
  -4   2  15   11.46    0.89
  -4  -2  15   10.71    0.87
  -4  -2  15    9.94    0.89
   4  -2 -15   11.09    0.88
   4   2 -15   11.81    0.90
   4  -2 -15   11.25    1.03
   4  -2 -15   12.28    1.05
  -4   2  15   12.17    0.91
   4  -2 -14    0.36    0.32
   4   2 -14   -0.05    0.21
   4  -2 -14    0.14    0.23
   4  -2 -14   -0.14    0.35
  -4  -2  14    0.48    0.18
  -4   2  14    0.26    0.23
   4  -2 -14    0.27    0.34
  -4   2  14    0.32    0.28
  -4  -2  14    0.26    0.28
  -4  -2  14   -0.05    0.25
  -4   2  14   -0.09    0.26
   4  -2 -14    0.40    0.41
   4  -2 -14    0.18    0.22
   4  -2 -14   -0.11    0.30
  -4   2  13    2.11    0.38
   4  -2 -13    0.87    0.38
   4   2 -13    1.59    0.34
   4  -2 -13    0.80    0.30
   4  -2 -13    1.28    0.51
   4  -2 -13    1.66    0.60
  -4  -2  13    0.97    0.23
  -4  -2  13    0.82    0.32
  -4  -2  13    0.80    0.35
   4  -2 -13    1.82    0.49
   4  -2 -13    1.29    0.43
  -4   2  13    0.86    0.39
   4  -2 -13    1.37    0.56
  -4  -2  12    7.14    0.95
   4  -2 -12    7.53    1.04
   4   2 -12    9.00    0.79
   4  -2 -12    9.79    0.82
   4  -2 -12    9.78    1.26
  -4   2  12    7.88    0.94
  -4   2  12    8.57    0.77
   4  -2 -12    7.92    0.83
   4  -2 -12    8.87    0.92
  -4  -2  12    8.11    0.77
  -4  -2  12    9.78    0.85
  -4  -2  12    7.96    0.65
  -4  -2  11  129.35    7.06
  -4   2  11  147.51    6.63
   4  -2 -11  125.27    6.69
   4  -2 -11  134.27    7.22
   4  -2 -11  140.09    6.66
   4  -2 -11  142.05    7.47
  -4   2  11  141.69    6.98
   4  -2 -11  128.67    6.79
  -4  -2  11  139.25    6.50
  -4  -2  11  132.14    6.67
  -4  -2  11  133.43    6.65
  -4  -2  10  103.40    5.63
  -4   2  10  108.51    5.15
   4  -2 -10   95.81    5.64
   4  -2 -10  106.67    5.96
  -4   2  10  114.37    5.52
   4  -2 -10  103.86    5.34
  -4  -2  10  102.48    5.06
  -4  -2  10  107.34    5.07
  -4  -2  10  102.11    5.22
  -4  -2  10   99.54    5.19
  -4  -2   9   51.39    2.60
  -4  -2   9   50.63    2.63
  -4  -2   9   48.44    2.59
   4  -2  -9   47.91    2.80
  -4  -2   9   49.38    3.07
  -4   2   9   54.89    2.68
  -4  -2   9   48.31    2.71
  -4  -2   9   49.17    2.70
   4  -2  -9   50.99    3.29
   4  -2  -9   53.28    3.33
  -4   2   9   52.03    2.92
   4  -2  -9   54.31    3.17
   4   2  -9   44.75    2.88
  -4  -2   8    0.76    0.23
  -4  -2   8    0.60    0.22
   4  -2  -8    0.48    0.28
  -4  -2   8    0.89    0.42
   4  -2  -8    1.09    0.34
  -4  -2   8    0.95    0.27
  -4  -2   8    0.76    0.28
   4   2  -8    0.95    0.29
   4  -2  -8    0.55    0.35
   4  -2  -8    1.62    0.52
   4  -2  -8    0.62    0.40
  -4   2   8    0.87    0.30
  -4  -2   8    0.63    0.28
  -4  -2   8    0.45    0.20
   4  -2  -8    0.65    0.29
  -4   2   8    1.02    0.26
  -4  -2   7   52.91    3.16
   4  -2  -7   59.47    3.28
  -4  -2   7   55.26    3.27
   4  -2  -7   56.93    3.21
   4   2  -7   53.62    3.07
   4  -2  -7   61.82    3.50
  -4   2   7   66.04    3.12
   4  -2  -7   56.65    3.40
  -4  -2   7   58.71    3.26
   4  -2  -7   55.06    2.83
   4  -2  -7   53.69    3.23
   4  -2  -7   57.49    3.17
  -4  -2   7   54.17    2.87
   4  -2  -7   53.41    2.82
  -4  -2   6    0.13    0.28
  -4  -2   6    0.14    0.23
   4  -2  -6    0.07    0.24
   4   2  -6    0.55    0.24
   4  -2  -6   -0.49    0.33
   4  -2  -6    0.17    0.22
  -4   2   6    0.60    0.24
   4  -2  -6    0.44    0.35
  -4  -2   6   -0.21    0.32
   4  -2  -6    0.27    0.21
   4  -2  -6    0.38    0.27
   4  -2  -6   -0.03    0.20
   4  -2  -6    0.07    0.30
  -4  -2   6    0.13    0.15
  -4  -2   5   38.86    2.48
  -4  -2   5   41.15    2.51
   4  -2  -5   39.64    2.54
   4  -2  -5   43.97    2.37
   4   2  -5   37.84    2.27
   4  -2  -5   46.42    2.69
  -4   2   5   44.45    2.25
   4  -2  -5   40.60    2.17
   4  -2  -5   44.69    2.61
  -4  -2   5   37.32    2.48
   4  -2  -5   42.99    2.61
   4  -2  -5   41.61    2.50
  -4  -2   5   39.53    2.19
   4  -2  -5   40.96    2.16
  -4  -2   4  449.37   22.67
  -4  -2   4  503.71   22.72
   4  -2  -4  509.72   22.85
   4  -2  -4  486.37   22.44
   4   2  -4  473.98   22.43
   4  -2  -4  541.57   22.91
  -4   2   4  513.79   22.34
   4  -2  -4  482.77   22.33
  -4  -2   4  444.36   22.68
   4  -2  -4  496.73   22.74
   4  -2  -4  526.39   22.90
   4  -2  -4  477.90   22.72
  -4  -2   4  463.74   22.34
  -4  -2   3   65.60    3.69
  -4  -2   3   77.72    3.75
   4  -2  -3   65.78    3.38
   4  -2  -3   75.13    3.87
  -4   2   3   68.50    3.29
   4  -2  -3   68.92    3.38
  -4  -2   3   62.66    3.69
   4  -2  -3   69.95    3.68
   4  -2  -3   66.21    3.80
   4  -2  -3   76.24    3.80
  -4  -2   3   60.40    3.36
   4  -2  -2  113.22    5.75
   4  -2  -2  140.17    6.31
  -4  -2   2  120.53    6.19
   4  -2  -2  132.11    6.10
   4  -2  -2  119.87    5.82
   4  -2  -2  126.14    6.23
  -4  -2   2  114.51    5.83
  -4  -2   2  128.59    6.17
   4  -2  -2  126.13    5.77
  -4  -2   1  466.61   18.96
   4  -2  -1  435.68   18.60
   4  -2  -1  358.76   18.38
  -4  -2   1  419.57   18.96
   4  -2  -1  412.28   18.55
  -4  -2   1  386.58   18.87
  -4  -2   1  401.67   18.56
   4  -2  -1  467.02   19.04
   4  -2  -1  435.27   19.00
  -4  -2   0   12.00    0.84
   4  -2   0   14.35    0.94
   4  -2   0   10.79    1.12
  -4  -2   0   11.79    1.06
   4  -2   0   12.15    1.07
   4  -2   1   11.48    0.86
   4  -2   1    9.99    0.74
   4  -2   1   10.14    1.06
  -4  -2  -1    9.19    0.72
  -4  -2  -1   11.24    0.99
  -4  -2  -1   10.03    0.76
   4  -2   2  444.04   19.90
  -4  -2  -2  423.99   20.02
   4  -2   2  413.79   19.61
   4  -2   2  432.10   20.13
  -4  -2  -2  425.10   19.63
  -4  -2  -2  430.18   19.97
   4  -2   2  445.77   20.05
  -4   2  -2  415.38   19.68
  -4  -2  -2  436.32   19.73
   4  -2   3 1716.74   72.78
   4  -2   3 1730.26   72.98
  -4  -2  -3 1587.50   72.43
   4  -2   3 1550.57   72.39
  -4  -2  -3 1605.63   72.81
   4  -2   3 1533.49   72.89
  -4  -2  -3 1565.44   72.57
  -4   2  -3 1533.23   72.48
   4  -2   3 1693.84   72.85
  -4  -2  -3 1593.31   72.77
  -4  -2  -4  907.76   40.60
   4  -2   4  947.12   40.77
  -4  -2  -4  885.58   40.15
   4   2   4  822.39   40.61
  -4  -2  -4  913.87   40.67
   4  -2   4  862.62   40.20
   4  -2   4  959.68   40.80
   4  -2   4  917.78   40.64
  -4   2  -4  826.29   40.31
  -4  -2  -4  902.25   40.49
  -4  -2  -4  907.29   40.25
   4  -2   4  851.39   40.20
  -4  -2  -5  197.46    9.41
   4  -2   5  203.39    9.53
  -4  -2  -5  190.78    8.99
   4   2   5  188.34    9.46
   4  -2   5  185.91    9.00
  -4  -2  -5  191.97    9.43
   4  -2   5  212.80    9.59
  -4   2  -5  177.72    9.15
   4  -2   5  197.36    9.41
  -4  -2  -5  194.78    9.39
   4  -2   5  194.74    9.02
  -4  -2  -5  196.61    9.06
  -4  -2  -6   18.60    1.40
   4  -2   6   19.48    1.49
  -4  -2  -6   19.39    1.46
   4  -2   6   18.18    1.10
   4  -2   6   18.08    1.44
  -4  -2  -6   17.96    1.13
   4   2   6   17.28    1.48
  -4  -2  -6   18.77    1.16
   4  -2   6   17.63    1.10
   4  -2   6   19.94    1.42
  -4   2  -6   18.44    1.28
  -4  -2  -6   19.17    1.47
   4  -2   7   38.84    2.07
  -4  -2  -7   42.20    2.15
  -4   2  -7   36.04    2.30
   4  -2   7   38.87    2.36
  -4  -2  -7   40.08    2.59
  -4  -2  -7   39.83    2.33
   4  -2   7   39.55    2.46
  -4  -2  -7   41.77    2.22
   4  -2   7   38.28    2.43
   4  -2   7   39.48    2.07
   4  -2   7   43.71    2.32
   4  -2   7   37.21    2.12
  -4  -2  -7   41.79    2.17
  -4  -2  -7   40.46    2.41
  -4  -2  -8    1.29    0.35
  -4  -2  -8    1.59    0.36
   4  -2   8    1.12    0.33
   4  -2   8    1.19    0.26
  -4  -2  -8    1.28    0.28
   4  -2   8    1.03    0.25
  -4  -2  -8    0.77    0.24
  -4  -2  -9   34.18    2.00
  -4  -2  -9   33.25    1.93
  -4  -2  -9   31.51    1.95
  -4  -2  -9   35.58    2.16
   4  -2   9   35.75    1.95
  -4  -2  -9   34.68    1.97
  -4   2  -9   32.28    1.87
   4  -2   9   35.47    1.88
  -4  -2 -10   11.40    0.93
  -4  -2 -10   10.39    0.92
  -4  -2 -10   10.34    0.87
  -4   2 -10   13.70    0.90
   4  -2  10   11.18    0.87
  -4  -2 -10   11.78    1.06
   4  -2  10   11.85    0.81
  -4  -2 -10   11.09    0.90
  -4   2 -10    9.95    0.81
  -4  -2 -11    0.48    0.37
   4   2  11    0.18    0.35
   4  -2  11    0.34    0.21
  -4  -2 -11    0.46    0.32
  -4  -2 -11   -0.22    0.29
  -4   2 -11    0.08    0.23
  -4  -2 -11    0.05    0.25
  -4  -2 -11   -0.15    0.26
   4   2  11    0.60    0.23
   4  -2  11    0.25    0.20
   4  -2  11    0.38    0.32
  -4  -2 -11    0.34    0.28
  -4  -2 -11    0.05    0.20
  -4   2 -11    0.04    0.18
  -4  -2 -12   24.22    2.11
  -4  -2 -12   28.81    1.82
  -4  -2 -12   26.28    1.61
  -4  -2 -12   25.16    1.64
  -4   2 -12   24.23    1.52
  -4  -2 -12   23.80    1.58
  -4  -2 -12   27.14    1.64
  -4   2 -12   22.66    1.50
   4  -2  12   27.12    2.26
   4  -2  12   24.94    1.55
   4   2  12   24.38    1.49
   4  -2  12   25.55    1.54
   4  -2  12   26.55    1.43
   4  -2  12   23.40    1.49
   4   2  12   27.24    1.97
  -4  -2 -13    2.61    0.53
   4  -2  13    2.69    0.32
   4  -2  13    2.01    0.37
  -4   2 -13    2.83    0.41
  -4  -2 -13    2.45    0.44
  -4  -2 -13    2.71    0.45
   4   2  13    2.20    0.35
   4  -2  13    2.30    0.39
   4  -2  13    1.86    0.57
   4  -2  13    2.03    0.33
  -4  -2 -13    2.43    0.42
  -4   2 -13    1.96    0.35
  -4  -2 -13    1.65    0.37
  -4  -2 -14   29.01    1.79
  -4  -2 -14   27.73    1.73
  -4   2 -14   27.15    1.63
   4  -2  14   29.85    1.68
   4   2  14   27.94    1.60
   4  -2  14   30.74    1.65
   4  -2  14   27.44    1.55
  -4  -2 -14   32.36    1.90
  -4  -2 -14   29.13    1.73
  -4  -2 -15    0.58    0.23
  -4   2 -15    0.34    0.23
  -4  -2 -15    0.79    0.31
   4   2  15    0.07    0.15
   4  -2  15    0.47    0.19
   4  -2  15    0.24    0.21
  -4  -2 -15    0.14    0.22
   4  -2  15    0.53    0.19
  -4  -2 -15    0.50    0.20
  -4  -2 -15    0.32    0.27
   4  -2  16   -0.03    0.16
   4  -2  16    0.22    0.15
  -4  -2 -16   -0.08    0.18
   4  -2  16   -0.06    0.17
  -4  -2 -16    0.46    0.19
  -4  -2 -16   -0.17    0.25
  -4   2 -16    0.03    0.20
  -4  -2 -16   -0.03    0.18
  -4   2 -17   22.59    1.29
   4   2  17   27.14    1.34
   4  -2  17   22.89    1.33
  -4  -2 -17   22.96    1.36
   4   2  18    4.67    0.34
  -4  -3  17    0.26    0.14
  -4  -3  17    0.68    0.15
  -4   3  17    0.36    0.10
   4  -3 -17    0.51    0.15
  -4   3  17    0.40    0.12
  -4  -3  17    0.32    0.12
  -4   3  16    3.58    0.34
  -4  -3  16    4.02    0.40
   4  -3 -16    3.72    0.44
   4  -3 -16    5.01    0.46
  -4  -3  16    4.23    0.42
  -4  -3  16    4.19    0.39
  -4  -3  16    4.23    0.39
  -4   3  16    3.60    0.36
  -4  -3  15    0.55    0.23
  -4   3  15    0.78    0.20
  -4   3  15    0.76    0.21
   4  -3 -15    0.77    0.27
  -4  -3  15    0.74    0.17
   4  -3 -15    0.59    0.29
   4  -3 -15    0.95    0.30
  -4  -3  15    0.68    0.25
  -4  -3  15    0.91    0.27
   4  -3 -15    1.03    0.24
  -4  -3  15    0.84    0.25
  -4  -3  14    3.03    0.40
  -4   3  14    2.25    0.32
  -4   3  14    2.45    0.35
   4  -3 -14    1.84    0.39
  -4  -3  14    2.56    0.31
   4  -3 -14    1.99    0.46
   4  -3 -14    1.97    0.42
  -4  -3  14    2.84    0.43
  -4  -3  14    2.70    0.41
   4  -3 -14    2.81    0.39
  -4  -3  14    2.10    0.37
  -4  -3  13    3.88    0.49
  -4   3  13    3.09    0.39
   4  -3 -13    2.78    0.51
  -4   3  13    2.73    0.40
  -4  -3  13    2.96    0.37
   4  -3 -13    3.25    0.57
   4  -3 -13    3.77    0.53
  -4  -3  13    3.46    0.52
  -4  -3  13    3.57    0.50
   4  -3 -13    2.61    0.45
  -4  -3  13    2.77    0.45
  -4   3  12   75.59    3.87
   4  -3 -12   74.26    4.02
  -4   3  12   75.49    3.84
  -4  -3  12   80.94    4.03
  -4  -3  12   82.41    3.85
   4  -3 -12   82.49    4.28
   4  -3 -12   74.81    4.10
  -4  -3  12   73.85    4.03
   4  -3 -12   70.62    3.98
  -4  -3  12   83.47    3.88
  -4  -3  12   72.99    3.88
  -4  -3  12   80.63    3.99
  -4  -3  12   78.28    4.02
   4  -3 -12   76.46    4.01
  -4  -3  11   79.42    4.21
  -4  -3  11   95.44    4.21
  -4  -3  11   85.58    4.29
   4  -3 -11   80.05    5.03
  -4  -3  11   86.96    4.36
   4  -3 -11   84.03    4.34
  -4   3  11   80.38    4.18
   4  -3 -11   77.19    4.33
  -4   3  11   78.46    4.13
  -4  -3  11   92.55    4.20
  -4  -3  11   87.13    4.35
   4  -3 -11   72.77    4.80
   4  -3 -11   81.81    4.44
   4  -3 -11   86.46    4.61
  -4  -3  11   87.10    4.39
  -4  -3  11   76.42    4.76
  -4  -3  10   55.59    3.03
  -4  -3  10   51.91    2.91
  -4  -3  10   60.96    2.88
  -4  -3  10   54.17    2.95
   4  -3 -10   48.39    3.58
   4  -3 -10   49.22    3.07
  -4  -3  10   53.03    3.05
   4  -3 -10   54.30    3.03
   4  -3 -10   65.72    3.03
  -4   3  10   52.86    2.87
   4  -3 -10   52.76    3.02
  -4   3  10   51.36    2.81
   4  -3 -10   50.99    3.54
  -4  -3  10   59.04    2.89
  -4  -3  10   58.63    3.06
  -4  -3  10   52.68    3.49
   4  -3  -9    6.13    0.96
  -4  -3   9    5.36    0.67
  -4  -3   9    6.64    0.60
  -4  -3   9    6.08    0.61
  -4  -3   9    5.79    0.67
  -4  -3   9    6.01    0.58
  -4  -3   9    7.37    0.67
  -4  -3   9    5.53    0.56
   4  -3  -9    6.12    0.73
   4  -3  -9    5.10    0.64
   4  -3  -9    7.19    0.69
  -4   3   9    5.25    0.56
   4  -3  -9    5.79    0.67
  -4   3   9    5.76    0.53
  -4  -3   9    6.33    0.92
   4  -3  -9    4.30    0.91
  -4  -3   9    6.30    0.71
  -4  -3   8    0.22    0.35
   4  -3  -8    0.36    0.21
   4  -3  -8    0.81    0.26
   4  -3  -8    0.37    0.34
  -4  -3   8    0.04    0.21
   4  -3  -8    0.46    0.25
   4  -3  -8    0.35    0.30
   4  -3  -8    0.23    0.20
   4  -3  -8    0.23    0.36
  -4  -3   8    0.22    0.24
  -4  -3   8    0.71    0.23
  -4  -3   8    0.71    0.26
   4  -3  -8    0.55    0.22
   4  -3  -8    0.24    0.30
   4  -3  -8    0.36    0.20
  -4   3   8    0.61    0.22
   4  -3  -8    0.53    0.29
  -4  -3   8    0.22    0.30
  -4  -3   8    0.89    0.34
  -4  -3   8    0.71    0.24
  -4  -3   8    0.44    0.26
   4  -3  -8    0.28    0.31
  -4  -3   8    0.30    0.26
   4  -3  -8    0.05    0.33
  -4  -3   7    1.38    0.46
   4  -3  -7    1.99    0.35
   4  -3  -7    1.80    0.51
  -4  -3   7    1.56    0.28
   4  -3  -7    2.14    0.62
  -4  -3   7    1.40    0.50
  -4  -3   7    1.69    0.31
   4  -3  -7    1.98    0.36
   4  -3  -7    1.46    0.45
   4  -3  -7    1.47    0.50
   4  -3  -7    1.57    0.35
   4  -3  -7    1.80    0.48
  -4  -3   7    1.66    0.38
  -4  -3   7    1.39    0.29
  -4  -3   7    1.19    0.30
   4  -3  -7    1.54    0.51
   4  -3  -7    1.22    0.32
  -4  -3   7    1.43    0.31
   4  -3  -7    1.41    0.39
  -4   3   7    2.10    0.31
   4  -3  -7    1.56    0.38
  -4  -3   7    1.05    0.32
  -4  -3   7    2.34    0.41
  -4  -3   7    1.30    0.36
  -4  -3   7    1.29    0.30
  -4  -3   7    1.23    0.35
   4  -3  -7    1.42    0.38
  -4  -3   7    1.47    0.35
   4  -3  -7    1.46    0.37
   4  -3  -6    2.50    0.41
   4  -3  -6    2.23    0.58
  -4  -3   6    2.02    0.53
  -4  -3   6    1.94    0.57
   4  -3  -6    2.58    0.44
   4  -3  -6    1.94    0.53
  -4  -3   6    2.30    0.34
   4  -3  -6    3.05    0.63
   4  -3  -6    2.57    0.40
  -4  -3   6    1.89    0.32
  -4  -3   6    2.89    0.39
   4  -3  -6    2.37    0.50
  -4  -3   6    2.34    0.43
   4  -3  -6    2.17    0.40
   4  -3  -6    3.52    0.68
  -4  -3   6    2.72    0.37
   4  -3  -6    2.30    0.44
   4  -3  -6    2.73    0.46
  -4  -3   6    2.34    0.37
   4  -3  -6    3.26    0.49
  -4  -3   6    2.35    0.42
   4  -3  -6    2.83    0.46
  -4  -3   6    2.49    0.42
  -4  -3   6    2.95    0.44
   4  -3  -6    1.93    0.55
  -4  -3   6    2.20    0.41
  -4  -3   6    2.61    0.46
  -4  -3   6    2.58    0.39
  -4  -3   5    1.02    0.32
  -4  -3   5    0.39    0.41
  -4  -3   5    0.53    0.23
  -4  -3   5    0.76    0.32
  -4  -3   5    0.99    0.45
   4  -3  -5    0.25    0.22
   4  -3  -5    0.56    0.41
  -4  -3   5    0.93    0.24
   4  -3  -5    0.10    0.39
   4  -3  -5    0.38    0.26
  -4  -3   5    0.99    0.22
  -4  -3   5    0.93    0.24
  -4  -3   5    0.86    0.30
   4  -3  -5    0.89    0.37
   4  -3  -5    0.71    0.30
   4  -3  -5    1.15    0.44
  -4  -3   5    0.67    0.24
   4  -3  -5    0.64    0.28
   4  -3  -5    0.47    0.28
  -4  -3   5    0.72    0.26
   4  -3  -5    0.86    0.32
  -4  -3   5    0.48    0.24
  -4  -3   5    0.77    0.30
  -4  -3   5    1.49    0.29
  -4  -3   5    1.15    0.31
  -4  -3   5    0.64    0.29
  -4  -3   5    0.80    0.30
   4  -3  -5    0.82    0.32
   4  -3  -5    0.52    0.37
  -4  -3   4   56.63    3.19
   4  -3  -4   63.12    3.20
  -4  -3   4   61.29    3.07
  -4  -3   4   51.60    3.55
  -4  -3   4   55.65    3.15
   4  -3  -4   59.32    3.77
  -4  -3   4   62.91    3.72
   4  -3  -4   56.12    3.23
   4  -3  -4   64.53    3.74
  -4  -3   4   55.91    3.17
  -4  -3   4   62.36    3.01
  -4  -3   4   57.66    3.17
  -4  -3   4   68.90    3.34
   4  -3  -4   58.71    3.39
   4  -3  -4   59.28    3.27
  -4  -3   4   66.00    3.15
   4  -3  -4   66.13    3.92
   4  -3  -4   57.11    3.26
   4  -3  -4   69.41    3.30
  -4  -3   4   54.19    3.09
   4  -3  -4   65.67    3.31
  -4  -3   4   62.94    3.28
  -4  -3   4   57.62    3.18
  -4  -3   4   55.89    3.14
  -4  -3   4   61.52    3.09
  -4  -3   4   61.14    3.22
   4  -3  -4   62.88    3.20
   4  -3  -4   62.88    3.70
  -4  -3   3    0.72    0.27
  -4  -3   3    0.67    0.42
  -4  -3   3    0.38    0.16
  -4  -3   3    0.46    0.31
   4  -3  -3    0.81    0.47
   4  -3  -3    1.06    0.33
  -4  -3   3    0.51    0.21
  -4  -3   3    0.75    0.41
   4  -3  -3    0.92    0.46
   4  -3  -3    0.31    0.26
   4  -3  -3    0.19    0.28
  -4  -3   3    1.07    0.33
  -4  -3   3    0.85    0.28
   4  -3  -3    0.53    0.27
   4  -3  -3    0.48    0.37
  -4  -3   3    0.48    0.24
  -4  -3   3    0.61    0.31
   4  -3  -3    0.30    0.25
  -4  -3   3    0.27    0.23
   4  -3  -3    0.28    0.31
  -4  -3   3    0.34    0.20
  -4  -3   3    0.72    0.28
  -4  -3   3    0.79    0.28
  -4  -3   3    0.55    0.25
  -4  -3   3    0.62    0.25
  -4  -3   3    0.36    0.24
   4  -3  -3    1.21    0.33
   4  -3  -3    0.76    0.39
   4  -3  -2   13.95    1.03
  -4  -3   2   11.83    1.00
  -4  -3   2   14.76    0.89
  -4  -3   2   13.58    0.97
  -4  -3   2   15.67    1.38
   4  -3  -2   11.67    1.02
   4  -3  -2   13.02    1.35
  -4  -3   2   12.40    1.00
  -4  -3   2   13.33    0.99
  -4  -3   2   15.40    1.11
  -4  -3   2   14.78    1.06
   4  -3  -2   12.09    1.09
  -4  -3   2   15.98    1.00
   4  -3  -2   12.86    1.45
   4  -3  -2   12.67    1.05
   4  -3  -2   15.08    1.08
   4  -3  -2   14.95    1.08
  -4  -3   2   11.95    0.94
  -4  -3   2   11.96    0.99
  -4  -3   2   15.21    1.12
  -4  -3   2   12.58    0.98
  -4  -3   2   13.86    0.93
  -4  -3   2   12.77    0.97
   4  -3  -2   13.83    1.02
   4  -3  -2   11.59    1.00
   4  -3  -2   16.68    1.39
   4  -3  -1   28.52    1.72
  -4  -3   1   26.25    1.71
   4  -3  -1   29.07    2.19
  -4  -3   1   30.04    1.81
   4  -3  -1   26.50    1.78
  -4  -3   1   30.03    1.76
   4  -3  -1   25.94    1.74
  -4  -3   1   25.96    1.66
  -4  -3   1   30.57    1.67
  -4  -3   1   24.39    1.61
  -4  -3   1   28.36    1.68
  -4  -3   1   28.41    1.78
  -4  -3   1   29.37    1.71
  -4  -3   1   29.82    1.64
  -4  -3   1   28.20    1.68
  -4  -3   1   28.04    1.66
  -4  -3   1   29.53    1.54
  -4  -3   1   29.17    2.12
   4  -3  -1   28.74    1.73
   4  -3  -1   26.82    1.73
  -4  -3   0    2.98    0.44
  -4  -3   0    2.33    0.41
   4  -3   0    2.49    0.43
  -4  -3   0    3.23    0.41
  -4  -3   0    3.40    0.42
   4  -3   0    2.12    0.41
  -4  -3   0    3.23    0.45
  -4  -3   0    2.87    0.45
  -4  -3   0    3.10    0.68
   4  -3   0    2.44    0.43
  -4  -3   0    2.39    0.43
   4  -3   0    3.50    0.76
   4  -3   0    2.16    0.43
   4  -3   0    1.61    0.41
   4  -3   0    3.61    0.74
  -4  -3   0    2.96    0.42
  -4  -3   0    3.24    0.45
  -4  -3   0    2.90    0.42
   4  -3   0    3.23    0.47
  -4  -3  -1    1.74    0.30
   4  -3   1    1.40    0.36
   4  -3   1    1.24    0.34
   4  -3   1    1.04    0.51
  -4  -3  -1    1.46    0.38
  -4  -3  -1    1.40    0.49
  -4  -3  -1    1.18    0.34
   4  -3   1    1.30    0.33
  -4  -3  -1    0.69    0.29
   4  -3   1    1.42    0.36
   4  -3   1    0.84    0.47
  -4  -3  -1    1.47    0.30
  -4  -3  -1    1.02    0.32
  -4  -3  -1    0.77    0.30
  -4  -3  -1    1.27    0.33
   4  -3   1    1.32    0.35
  -4  -3  -1    1.59    0.31
  -4  -3  -1    1.03    0.27
   4  -3   1    1.33    0.38
  -4  -3  -1    1.09    0.30
   4  -3   1    1.73    0.38
  -4  -3  -1    1.49    0.32
   4   3   2    0.59    0.37
  -4  -3  -2    1.50    0.51
  -4  -3  -2    0.17    0.29
  -4  -3  -2    1.08    0.31
   4  -3   2    0.63    0.28
   4  -3   2    2.39    0.63
   4  -3   2    1.13    0.36
   4  -3   2    0.75    0.32
   4  -3   2    1.15    0.48
   4  -3   2    0.82    0.29
  -4  -3  -2    0.57    0.21
  -4  -3  -2    0.75    0.28
   4  -3   2    0.36    0.23
  -4  -3  -2    1.09    0.30
   4  -3   2    0.68    0.32
   4  -3   2    0.72    0.43
  -4  -3  -2    0.55    0.24
  -4  -3  -2    0.39    0.27
  -4  -3  -2    0.38    0.26
  -4  -3  -2    0.40    0.29
  -4  -3  -2    1.27    0.34
  -4  -3  -2    0.29    0.23
   4  -3   2    0.92    0.30
  -4  -3  -2    0.70    0.24
   4  -3   2    0.83    0.32
  -4  -3  -2    0.22    0.26
  -4  -3  -2    0.51    0.24
  -4  -3  -2    0.26    0.27
   4  -3   3  111.92    5.29
   4   3   3  104.51    5.69
  -4  -3  -3  111.00    5.25
  -4  -3  -3  109.13    5.79
   4  -3   3  102.75    5.34
   4  -3   3  112.53    6.01
   4  -3   3  109.05    5.67
  -4  -3  -3  107.25    5.31
   4  -3   3  102.92    5.26
   4  -3   3  112.90    5.30
   4  -3   3  109.34    5.84
  -4  -3  -3  109.34    5.31
  -4  -3  -3  110.65    5.32
  -4  -3  -3  101.14    5.30
  -4  -3  -3  104.82    5.44
  -4  -3  -3  122.75    5.28
   4  -3   3  112.86    6.05
   4  -3   3  105.45    5.36
  -4  -3  -3   93.99    5.24
  -4  -3  -3  108.80    5.33
  -4  -3  -3  108.17    5.44
  -4  -3  -3  102.15    5.27
  -4  -3  -3  103.72    5.20
  -4  -3  -3  108.09    5.19
   4  -3   3  105.31    5.31
   4  -3   3  109.22    5.27
  -4  -3  -3  101.41    5.28
  -4  -3  -3   95.82    5.27
   4   3   4    4.29    0.75
  -4  -3  -4    5.17    0.82
   4  -3   4    5.01    0.63
   4  -3   4    5.96    0.81
   4  -3   4    6.40    0.94
  -4  -3  -4    5.29    0.61
   4  -3   4    5.61    0.59
   4  -3   4    4.92    0.58
  -4  -3  -4    6.03    0.62
   4  -3   4    3.87    0.75
   4  -3   4    4.13    0.54
  -4  -3  -4    5.05    0.59
  -4  -3  -4    5.25    0.69
  -4  -3  -4    6.28    0.57
   4  -3   4    6.79    0.97
   4  -3   4    5.60    0.63
  -4  -3  -4    5.74    0.63
  -4  -3  -4    5.10    0.58
  -4  -3  -4    6.71    0.67
  -4  -3  -4    5.58    0.67
   4  -3   4    4.93    0.56
   4  -3   4    4.39    0.53
  -4  -3  -4    5.72    0.54
  -4  -3  -4    5.55    0.52
   4  -3   4    4.38    0.54
   4  -3   5   19.53    1.24
   4   3   5   19.99    1.65
  -4  -3  -5   16.97    1.55
   4  -3   5   17.72    1.64
   4  -3   5   19.65    1.66
   4  -3   5   17.97    1.28
   4  -3   5   18.46    1.23
   4  -3   5   16.80    1.23
  -4  -3  -5   19.26    1.29
  -4  -3  -5   19.49    1.28
   4  -3   5   19.38    1.61
   4  -3   5   17.11    1.23
  -4  -3  -5   16.69    1.27
  -4  -3  -5   18.24    1.40
  -4  -3  -5   21.86    1.25
   4  -3   5   18.78    1.71
   4  -3   5   18.50    1.31
  -4  -3  -5   16.85    1.26
  -4  -3  -5   18.85    1.27
  -4  -3  -5   20.44    1.33
  -4  -3  -5   16.61    1.34
  -4  -3  -5   19.27    1.16
   4  -3   5   19.31    1.29
  -4  -3  -5   19.25    1.29
   4   3   6   85.91    4.97
  -4  -3  -6   92.61    4.99
   4  -3   6   76.34    4.45
   4  -3   6   90.27    4.44
   4  -3   6   85.73    5.08
   4  -3   6   85.83    4.50
   4  -3   6   87.33    5.03
   4  -3   6   85.72    4.86
  -4  -3  -6   94.27    4.52
   4  -3   6   85.47    4.49
  -4  -3  -6   83.07    4.51
  -4  -3  -6   88.83    4.74
   4  -3   6   85.28    4.50
  -4  -3  -6   86.94    4.56
   4  -3   6   88.92    5.05
  -4  -3  -6   91.57    4.55
  -4  -3  -6   88.47    4.58
  -4  -3  -6   95.22    4.52
  -4  -3  -6   87.93    4.70
  -4  -3  -6  103.07    4.63
   4  -3   6   93.37    4.57
  -4  -3  -6   99.46    4.40
   4  -3   6   91.39    4.44
   4  -3   7   10.23    1.02
  -4  -3  -7    9.91    0.98
   4  -3   7   10.80    0.77
   4  -3   7    9.12    0.84
   4   3   7    7.28    1.04
  -4  -3  -7    8.45    0.86
  -4  -3  -7    9.40    0.85
  -4  -3  -7   11.27    0.92
  -4  -3  -7    9.87    0.98
   4  -3   7   12.69    0.95
   4  -3   7   11.15    0.87
   4  -3   7   10.55    0.76
   4  -3   7   11.71    1.29
  -4  -3  -7   10.77    0.74
   4  -3   8    5.36    0.58
   4   3   8    5.80    0.87
   4  -3   8    3.71    0.53
   4  -3   8    5.55    0.93
  -4  -3  -8    5.94    0.76
  -4  -3  -8    5.23    0.57
   4  -3   8    5.20    0.52
  -4  -3  -8    5.99    0.74
   4  -3   8    6.20    0.67
  -4  -3  -8    5.23    0.66
  -4  -3  -8    6.15    0.63
   4  -3   9    0.24    0.35
   4   3   9   -0.19    0.34
  -4  -3  -9    0.73    0.35
  -4  -3  -9    0.07    0.32
   4  -3   9    0.14    0.23
  -4  -3  -9    0.45    0.24
  -4  -3  -9    0.68    0.36
  -4  -3  -9    0.43    0.28
   4  -3   9    0.11    0.23
   4  -3   9   -0.07    0.21
  -4  -3 -10   56.77    3.23
  -4  -3 -10   57.89    3.07
  -4  -3 -10   52.31    2.95
   4   3  10   58.91    3.49
   4  -3  10   57.09    3.02
   4  -3  10   58.31    3.72
  -4  -3 -10   58.81    3.17
   4  -3  10   54.05    2.91
   4  -3  10   63.77    2.94
   4  -3  10   47.53    2.95
  -4  -3 -11   -0.06    0.31
  -4  -3 -11   -0.05    0.29
   4  -3  11   -0.12    0.25
   4  -3  11    0.36    0.22
   4  -3  11    0.16    0.24
  -4  -3 -11   -0.04    0.24
  -4  -3 -11   -0.09    0.28
   4  -3  11    0.17    0.17
   4  -3  11    0.17    0.22
  -4  -3 -12    0.17    0.28
  -4  -3 -12    0.24    0.27
   4  -3  12    0.51    0.23
   4  -3  12    0.43    0.25
   4  -3  12    0.71    0.24
  -4  -3 -12    0.76    0.28
   4  -3  12    0.32    0.23
  -4  -3 -12    0.16    0.25
   4  -3  12    0.32    0.18
  -4  -3 -13    1.64    0.32
   4  -3  13    1.04    0.28
   4  -3  13    2.30    0.31
  -4  -3 -13    1.67    0.35
   4  -3  13    1.71    0.27
   4  -3  13    1.31    0.28
  -4  -3 -13    1.83    0.41
   4  -3  13    1.94    0.33
   4  -3  14   23.28    1.22
  -4  -3 -14   17.43    1.06
  -4   3 -14   16.29    1.08
   4   3  14   20.99    1.16
  -4  -3 -14   20.38    1.30
   4  -3  14   20.37    1.09
  -4  -3 -14   18.69    1.16
   4  -3  14   22.76    1.18
   4  -3  14   16.98    1.16
   4  -3  15    0.04    0.15
  -4  -3 -15    0.05    0.18
   4  -3  15    0.38    0.16
   4   3  15    0.08    0.12
   4  -3  16    0.43    0.13
   4   3  16    0.42    0.11
   4  -4 -15    1.50    0.18
  -4  -4  15    1.40    0.16
   4  -4 -14    7.72    0.56
   4  -4 -14    7.98    0.55
  -4  -4  14    8.82    0.46
   4  -4 -13   13.68    0.86
   4  -4 -13   14.50    0.97
   4  -4 -13   12.99    0.86
  -4  -4  13   13.61    0.79
   4  -4 -12    2.63    0.45
  -4  -4  12    3.59    0.34
   4  -4 -12    2.50    0.39
   4  -4 -12    2.38    0.35
   4  -4 -11    0.55    0.27
  -4  -4  11    0.65    0.23
   4  -4 -11    0.53    0.35
   4  -4 -11    0.64    0.29
   4  -4 -11    0.81    0.24
   4  -4 -10    2.22    0.44
  -4  -4  10    2.61    0.34
  -4  -4  10    3.96    0.42
  -4  -4  10    3.59    0.49
   4  -4 -10    2.64    0.43
   4  -4 -10    3.62    0.50
   4  -4  -9    0.24    0.24
  -4  -4   9   -0.03    0.21
   4  -4  -9    0.16    0.28
  -4  -4   9   -0.09    0.27
   4  -4  -9    0.56    0.32
   4  -4  -9    0.09    0.29
   4  -4  -8    0.31    0.28
  -4  -4   8    0.32    0.20
   4  -4  -8    0.80    0.35
   4  -4  -8    0.47    0.20
  -4  -4   8    0.68    0.29
   4  -4  -8    0.48    0.21
  -4  -4   8    0.52    0.22
   4  -4  -8    0.77    0.41
   4  -4  -8    0.39    0.21
   4  -4  -8    0.36    0.26
  -4  -4   8    0.51    0.29
   4  -4  -8    0.76    0.35
  -4  -4   7    1.24    0.30
   4  -4  -7    1.53    0.48
  -4  -4   7    1.58    0.28
   4  -4  -7    1.44    0.29
   4  -4  -7    1.35    0.38
   4  -4  -7    1.74    0.32
   4  -4  -7    1.10    0.38
   4  -4  -7    1.07    0.38
  -4  -4   7    1.12    0.29
   4  -4  -7    0.90    0.29
  -4  -4   7    1.51    0.29
  -4  -4   7    0.80    0.24
  -4  -4   7    1.06    0.35
   4  -4  -7    1.98    0.34
   4  -4  -7    1.64    0.41
  -4  -4   7    1.11    0.36
  -4  -4   7    1.90    0.39
  -4  -4   6    7.07    0.60
  -4  -4   6    5.73    0.66
   4  -4  -6    5.08    0.76
  -4  -4   6    6.16    0.53
  -4  -4   6    5.31    0.58
   4  -4  -6    4.67    0.64
   4  -4  -6    5.87    0.64
   4  -4  -6    5.60    0.84
  -4  -4   6    5.47    0.55
   4  -4  -6    7.94    0.77
   4  -4  -6    6.07    0.73
   4  -4  -6    6.28    0.88
   4  -4  -6    6.19    0.64
  -4  -4   6    5.41    0.57
  -4  -4   6    6.00    0.67
  -4  -4   6    8.07    0.82
   4  -4  -6    6.24    0.61
   4  -4  -6    7.19    0.66
   4  -4  -6    7.39    0.83
  -4  -4   6    8.47    0.75
  -4  -4   6    6.07    0.56
  -4  -4   5   20.81    1.23
  -4  -4   5   18.92    1.32
   4  -4  -5   17.32    1.37
   4  -4  -5   17.55    1.50
  -4  -4   5   16.03    1.21
  -4  -4   5   19.80    1.15
   4  -4  -5   16.76    1.59
  -4  -4   5   23.67    1.33
   4  -4  -5   17.48    1.32
   4  -4  -5   21.88    1.88
   4  -4  -5   23.33    1.45
   4  -4  -5   20.52    1.44
  -4  -4   5   17.26    1.21
   4  -4  -5   20.34    1.37
   4  -4  -5   17.58    1.73
  -4  -4   5   16.05    1.22
  -4  -4   5   19.03    1.35
  -4  -4   5   20.89    1.48
   4  -4  -5   18.97    1.28
   4  -4  -5   18.68    1.29
  -4  -4   5   22.15    1.27
  -4  -4   5   21.44    1.36
  -4  -4   4   11.01    0.90
  -4  -4   4   11.00    0.80
   4  -4  -4    9.20    0.94
   4  -4  -4    9.78    1.05
  -4  -4   4    8.42    0.79
  -4  -4   4   10.43    0.72
   4  -4  -4    9.30    1.17
  -4  -4   4   12.78    0.91
   4  -4  -4   10.31    0.94
   4  -4  -4    9.71    1.33
   4  -4  -4   11.79    1.00
  -4  -4   4   10.28    0.85
   4  -4  -4   11.77    1.03
   4  -4  -4   10.83    0.95
   4  -4  -4    9.68    1.24
  -4  -4   4   11.05    0.95
  -4  -4   4    8.95    0.82
  -4  -4   4   11.43    1.04
   4  -4  -4   11.61    0.91
   4  -4  -4   11.70    0.94
  -4  -4   4   12.07    0.86
  -4  -4   4   11.29    0.98
   4  -4  -3    4.41    0.58
   4  -4  -3    4.01    0.81
  -4  -4   3    3.62    0.46
  -4  -4   3    3.59    0.42
   4  -4  -3    2.74    0.59
  -4  -4   3    4.80    0.55
   4  -4  -3    3.04    0.53
   4  -4  -3    3.56    0.55
   4  -4  -3    3.82    0.79
   4  -4  -3    5.25    0.66
  -4  -4   3    3.29    0.49
   4  -4  -3    3.26    0.78
   4  -4  -3    4.19    0.59
  -4  -4   3    4.02    0.49
  -4  -4   3    3.65    0.58
  -4  -4   3    3.89    0.52
   4  -4  -3    3.91    0.55
  -4  -4   3    4.31    0.59
  -4  -4   3    3.73    0.51
   4  -4  -3    4.89    0.66
   4  -4  -2   28.84    2.02
  -4  -4   2   32.45    1.93
  -4  -4   2   33.08    1.77
   4  -4  -2   30.63    2.41
  -4  -4   2   28.65    1.84
   4  -4  -2   32.12    1.96
   4  -4  -2   31.52    2.01
  -4  -4   2   36.20    2.10
   4  -4  -2   27.16    2.05
  -4  -4   2   37.49    2.16
  -4  -4   2   37.87    1.98
   4  -4  -2   33.04    2.65
   4  -4  -2   30.64    2.06
  -4  -4   2   28.74    1.83
  -4  -4   2   29.28    1.89
   4  -4  -2   31.31    2.57
  -4  -4   2   31.59    1.92
   4  -4  -2   31.68    2.13
  -4  -4   2   36.28    1.92
  -4  -4   2   36.88    2.00
  -4  -4   2   34.48    2.05
   4  -4  -2   35.71    2.02
   4  -4  -1   40.00    2.89
  -4  -4   1   43.11    2.45
   4  -4  -1   38.81    2.49
  -4  -4   1   44.75    2.54
   4  -4  -1   42.59    2.42
   4  -4  -1   41.64    2.38
  -4  -4   1   46.63    2.37
   4  -4  -1   52.12    2.53
  -4  -4   1   33.93    2.23
  -4  -4   1   36.92    2.30
   4  -4  -1   43.95    2.43
   4  -4  -1   41.36    2.46
  -4  -4   1   42.88    2.54
  -4  -4   1   40.03    2.33
  -4  -4   1   40.04    2.31
  -4  -4   1   38.89    2.13
  -4  -4   1   34.06    2.22
   4  -4  -1   39.50    2.48
  -4  -4   1   44.52    2.46
  -4  -4   1   45.11    2.31
  -4  -4   1   44.41    2.36
  -4  -4   0   47.49    2.64
   4  -4   0   54.46    2.91
   4  -4   0   43.91    3.40
  -4  -4   0   46.80    2.68
  -4  -4   0   46.80    2.72
   4  -4   0   54.27    2.90
   4  -4   0   46.01    3.41
  -4  -4   0   48.28    2.77
  -4  -4   0   49.29    2.74
  -4  -4   0   54.85    2.95
   4  -4   0   40.56    2.55
  -4  -4   0   51.75    2.70
  -4  -4   0   47.09    2.48
  -4  -4   0   49.87    2.92
  -4  -4   0   53.95    2.85
   4  -4   0   49.89    2.87
   4  -4   0   54.51    2.88
   4  -4   0   47.22    2.86
  -4  -4   0   57.08    2.87
  -4  -4   0   54.96    2.76
   4  -4   1   32.81    2.58
   4  -4   1   31.15    2.08
  -4  -4  -1   35.98    2.07
   4  -4   1   33.14    1.99
  -4  -4  -1   37.90    2.34
  -4  -4  -1   41.78    2.27
   4  -4   1   35.42    2.20
   4  -4   1   40.93    2.28
   4  -4   1   37.07    2.82
  -4  -4  -1   34.02    2.09
   4  -4   1   36.82    2.23
   4  -4   1   34.40    2.75
  -4  -4  -1   38.04    2.16
  -4  -4  -1   37.65    2.31
  -4  -4  -1   36.17    2.17
   4   4   1   29.45    2.32
   4  -4   1   39.15    2.23
   4  -4   1   32.54    2.20
  -4  -4  -1   42.64    2.25
  -4  -4  -1   37.46    2.10
   4   4   2   32.82    2.63
   4  -4   2   38.56    2.34
   4  -4   2   45.83    3.04
   4  -4   2   37.61    2.43
  -4  -4  -2   47.27    2.56
   4  -4   2   44.76    2.53
  -4  -4  -2   44.96    2.67
   4  -4   2   46.06    2.49
  -4  -4  -2   52.19    2.49
   4  -4   2   44.00    2.56
   4  -4   2   39.08    3.07
  -4  -4  -2   38.18    2.42
   4  -4   2   43.22    2.55
   4  -4   2   44.52    3.17
  -4  -4  -2   43.51    2.49
  -4  -4  -2   42.82    2.61
  -4  -4  -2   42.29    2.49
   4  -4   2   47.11    2.52
   4  -4   2   42.24    2.52
  -4  -4  -2   49.56    2.42
  -4  -4  -2   47.12    2.44
   4   4   3    0.52    0.35
   4  -4   3    0.62    0.31
  -4  -4  -3    0.58    0.30
  -4  -4  -3    0.96    0.43
   4  -4   3    0.38    0.26
   4  -4   3    1.04    0.45
   4  -4   3    0.71    0.33
  -4  -4  -3    0.83    0.34
  -4  -4  -3    0.27    0.38
   4  -4   3    0.26    0.40
   4  -4   3    0.67    0.36
  -4  -4  -3    0.79    0.28
  -4  -4  -3    0.40    0.34
  -4  -4  -3    1.12    0.41
   4  -4   3    0.50    0.47
   4  -4   3    0.38    0.35
  -4  -4  -3    0.93    0.31
  -4  -4  -3    0.65    0.36
   4  -4   3    1.24    0.37
   4  -4   3    1.12    0.36
  -4  -4  -3    0.74    0.27
   4   4   4   12.43    1.24
   4  -4   4   12.58    1.00
   4  -4   4   12.81    1.32
   4  -4   4   14.35    1.05
  -4  -4  -4   14.10    1.22
  -4  -4  -4   13.12    1.08
   4  -4   4   13.64    1.01
  -4  -4  -4   17.82    1.07
   4  -4   4   12.67    1.06
   4  -4   4   13.48    1.46
  -4  -4  -4   12.49    1.06
  -4  -4  -4   13.58    1.08
  -4  -4  -4   11.70    0.98
   4  -4   4   12.93    1.04
   4  -4   4   12.61    1.42
  -4  -4  -4   14.62    1.12
  -4  -4  -4   13.88    1.08
  -4  -4  -4   14.50    1.22
   4  -4   4   14.93    1.05
   4  -4   4   12.52    1.03
  -4  -4  -4   15.25    0.99
  -4  -4  -4   14.59    0.98
   4   4   5   19.83    1.74
   4  -4   5   24.45    1.54
  -4  -4  -5   22.92    1.55
  -4  -4  -5   24.94    1.76
   4  -4   5   22.53    1.54
   4  -4   5   21.36    1.93
   4  -4   5   24.91    1.57
  -4  -4  -5   21.98    1.49
  -4  -4  -5   23.08    1.55
   4  -4   5   21.67    1.86
   4  -4   5   24.97    1.54
  -4  -4  -5   28.80    1.67
  -4  -4  -5   25.60    1.56
  -4  -4  -5   21.44    1.63
   4  -4   5   23.17    1.47
   4  -4   5   26.55    1.52
   4  -4   5   26.92    1.54
  -4  -4  -5   27.23    1.46
  -4  -4  -5   24.23    1.42
   4  -4   6    0.26    0.24
  -4  -4  -6    0.46    0.35
  -4  -4  -6    0.30    0.21
   4  -4   6    0.29    0.25
   4  -4   6    0.22    0.22
  -4  -4  -6    0.07    0.32
   4  -4   6    0.45    0.23
  -4  -4  -6    0.49    0.26
  -4  -4  -6    0.14    0.30
   4  -4   6    0.08    0.21
  -4  -4  -6    0.41    0.21
  -4  -4  -6    0.12    0.26
   4  -4   6    0.47    0.22
   4  -4   6    0.24    0.19
   4  -4   7   12.72    0.91
  -4  -4  -7   15.97    0.98
  -4  -4  -7   10.23    1.02
   4  -4   7   12.48    0.98
  -4  -4  -7   12.28    0.94
  -4  -4  -7   14.71    1.18
  -4  -4  -7   14.75    1.02
  -4  -4  -7   12.32    1.00
  -4  -4  -7   12.46    0.98
   4  -4   7   12.26    0.88
   4  -4   7   13.91    0.97
   4  -4   7   11.67    0.90
   4  -4   7   13.43    0.85
   4  -4   8    3.62    0.46
   4  -4   8    5.16    0.52
  -4  -4  -8    3.83    0.56
  -4  -4  -8    4.69    0.57
  -4  -4  -8    4.14    0.51
  -4  -4  -8    5.83    0.58
  -4  -4  -8    4.72    0.67
   4  -4   9    2.48    0.37
   4  -4   9    3.33    0.41
  -4  -4  -9    2.94    0.51
  -4  -4  -9    2.25    0.38
  -4  -4  -9    3.32    0.45
   4  -4   9    3.12    0.42
  -4  -4  -9    2.38    0.44
   4  -4  10    5.78    0.51
   4  -4  10    6.62    0.52
   4  -4  10    5.65    0.53
  -4  -4 -10    5.79    0.65
  -4  -4 -10    5.00    0.54
  -4  -4 -10    4.94    0.54
  -4  -4 -10    4.35    0.53
  -4  -4 -11    0.52    0.26
  -4  -4 -11    0.42    0.23
  -4  -4 -11    0.09    0.19
   4  -4  11    0.29    0.17
   4  -4  11    0.22    0.17
   4  -4  11    0.38    0.19
  -4  -4 -11    0.11    0.19
  -4  -4 -12    0.09    0.17
   4  -4  12    0.25    0.15
   4  -4  12    0.16    0.14
  -4  -4 -12    0.48    0.19
  -4  -4 -12    0.22    0.15
   4  -4  12    0.24    0.15
  -4  -4 -12    0.18    0.13
   4  -4  13    3.25    0.29
  -4  -4 -13    2.50    0.31
  -4  -4 -13    2.72    0.30
   4  -4  13    3.06    0.25
  -4  -5  10    1.55    0.19
   4  -5 -10    1.48    0.19
  -4  -5   9   20.57    1.17
   4  -5  -9   19.87    1.17
  -4  -5   9   22.91    1.11
   4  -5  -8    3.71    0.42
   4  -5  -8    2.89    0.34
  -4  -5   8    3.45    0.38
   4  -5  -8    3.34    0.37
  -4  -5   8    4.38    0.33
   4  -5  -7   16.47    1.14
   4  -5  -7   17.41    1.09
  -4  -5   7   17.57    1.09
  -4  -5   7   18.79    0.98
   4  -5  -7   17.51    1.08
   4  -5  -6    2.13    0.34
   4  -5  -6    1.96    0.35
  -4  -5   6    2.60    0.37
   4  -5  -6    2.23    0.27
   4  -5  -6    1.63    0.37
  -4  -5   6    2.05    0.26
   4  -5  -5    0.03    0.18
   4  -5  -5   -0.07    0.22
   4  -5  -5    0.17    0.17
   4  -5  -5   -0.11    0.24
  -4  -5   5    0.09    0.25
   4  -5  -5   -0.12    0.20
   4  -5  -5   -0.20    0.30
  -4  -5   5   -0.05    0.14
  -4  -5   4    1.84    0.37
   4  -5  -4    1.86    0.34
   4  -5  -4    1.81    0.29
   4  -5  -4    1.81    0.37
   4  -5  -4    2.14    0.34
   4  -5  -4    2.41    0.35
   4  -5  -3    4.87    0.55
  -4  -5   3    5.40    0.47
  -4  -5   3    5.44    0.54
   4  -5  -3    4.74    0.53
   4  -5  -3    3.63    0.51
   4  -5  -3    2.99    0.39
   4  -5  -3    5.42    0.51
   4  -5  -3    4.73    0.48
   4  -5  -3    4.40    0.45
   4  -5  -2   17.12    1.20
  -4  -5   2   21.06    1.11
  -4  -5   2   21.61    1.17
   4  -5  -2   17.18    1.19
  -4  -5   2   16.51    1.07
   4  -5  -2   12.95    1.01
  -4  -5   2   18.73    1.26
   4  -5  -2   16.47    1.06
   4  -5  -1    3.53    0.49
  -4  -5   1    5.06    0.49
  -4  -5   1    5.75    0.52
   4  -5  -1    5.01    0.48
  -4  -5   1    3.71    0.46
  -4  -5   1    4.93    0.62
   4  -5  -1    4.05    0.51
   4  -5  -1    3.38    0.42
   4  -5   0   15.31    1.02
   4  -5   0   12.99    1.01
  -4  -5   0   16.98    0.99
   4  -5   0   15.59    1.03
  -4  -5   0   13.60    0.96
  -4  -5   0   14.33    1.09
  -4  -5   0   13.92    1.02
   4  -5   0   14.31    0.99
   4  -5   0   11.32    0.89
   4  -5   1    2.66    0.39
   4  -5   1    2.05    0.37
   4  -5   1    2.11    0.37
  -4  -5  -1    3.57    0.39
   4  -5   1    2.19    0.37
  -4  -5  -1    2.15    0.39
  -4  -5  -1    1.72    0.31
  -4  -5  -1    2.69    0.43
  -4  -5  -1    2.35    0.45
   4  -5   1    2.17    0.34
   4  -5   2    0.12    0.20
   4  -5   2    0.71    0.22
   4  -5   2    0.38    0.24
  -4  -5  -2    0.08    0.21
  -4  -5  -2    0.56    0.20
   4  -5   2    0.16    0.21
   4  -5   2    0.47    0.23
  -4  -5  -2    0.34    0.22
  -4  -5  -2    0.54    0.28
   4  -5   2    0.40    0.21
  -4  -5  -3    0.03    0.19
   4  -5   3   -0.19    0.20
   4  -5   3    0.03    0.18
   4  -5   3   -0.09    0.18
  -4  -5  -3   -0.12    0.23
  -4  -5  -3   -0.26    0.30
   4  -5   3    0.12    0.18
  -4  -5  -3    0.23    0.24
   4  -5   3   -0.14    0.18
  -4  -5  -4    0.54    0.23
   4  -5   4    0.47    0.17
  -4  -5  -4    0.36    0.26
   4  -5   4    0.42    0.18
   4  -5   4    0.16    0.16
   4  -5   4    0.55    0.20
  -4  -5  -4    0.53    0.28
   4  -5   4    0.28    0.18
   4  -5   5    0.25    0.19
   4  -5   5    0.19    0.13
  -4  -5  -5    0.19    0.21
   4  -5   5    0.28    0.15
  -4  -5  -5    0.14    0.22
  -4  -5  -5    0.07    0.24
   4  -5   5    0.35    0.16
   4  -5   5    0.10    0.15
  -4  -5  -6    5.63    0.51
   4  -5   6    5.63    0.40
  -4  -5  -6    6.47    0.60
   4  -5   6    6.84    0.42
   4  -5   6    5.85    0.43
  -4  -5  -7    2.66    0.32
   4  -5   7    3.09    0.29
  -4  -5  -7    3.73    0.42
   4  -5   8   -0.04    0.12
  -4  -5  -8    0.07    0.14
   4  -5   8    0.10    0.09
  -4  -5  -8    0.19    0.14
   4  -5   9    2.48    0.20
   4  -5   9    2.65    0.22
  -4  -5  -9    2.59    0.26
  -4  -5  -9    2.57    0.24
  -5   0  20    0.52    0.12
   5   0 -20    0.58    0.18
   5   0 -19   -0.10    0.20
  -5   0  19   -0.03    0.10
  -5   0  18    1.22    0.24
   5   0 -18    1.20    0.26
   5   0 -18    1.29    0.34
  -5   0  18    1.09    0.23
  -5   0  17   -0.07    0.17
  -5   0  17    0.46    0.21
  -5   0  17   -0.07    0.17
   5   0 -17    0.05    0.29
   5   0 -17    0.04    0.23
   5   0 -16   36.32    2.23
  -5   0  16   36.37    2.00
  -5   0  16   35.52    2.01
   5   0 -16   35.07    2.09
   5   0 -15   -0.05    0.29
   5   0 -15   -0.13    0.47
  -5   0  15    0.60    0.29
  -5   0  15    0.16    0.25
   5   0 -14  512.65   25.83
  -5   0  14  552.61   25.04
   5   0 -14  550.30   25.15
  -5   0  14  539.66   25.02
   5   0 -13   -0.05    0.27
   5   0 -13    0.25    0.41
  -5   0  13    0.17    0.21
  -5   0  13    0.13    0.22
   5   0 -12   50.79    3.31
  -5   0  12   49.23    2.67
  -5   0  12   50.98    2.69
   5   0 -12   50.32    2.79
  -5   0  11    0.34    0.20
   5   0 -11    0.31    0.28
   5   0 -11    0.05    0.18
  -5   0  10   12.67    1.13
   5   0 -10   12.69    1.28
  -5   0  10   13.84    0.93
   5   0  -9   -0.08    0.26
  -5   0   9    0.06    0.24
  -5   0   8 1200.50   53.56
   5   0  -8 1229.08   54.00
  -5   0   8 1104.67   53.76
   5   0  -7    0.37    0.34
  -5   0   7    0.09    0.18
   5   0  -6  321.36   15.72
  -5   0   6  344.30   15.51
  -5   0   5   -0.09    0.16
   5   0  -5    0.09    0.24
   5   0  -5    0.48    0.26
   5   0  -4   67.17    3.74
  -5   0   4   75.91    3.60
   5   0  -3    0.04    0.16
   5   0  -2    0.43    0.18
   5   0  -1   -0.11    0.17
  -5   0   1    0.09    0.18
   5   0   0   24.63    1.48
  -5   0   0   24.55    1.52
  -5   0  -1    0.27    0.19
  -5   0  -2    5.95    0.64
  -5   0  -3   -0.05    0.25
  -5   0  -3    0.24    0.15
   5   0   4    0.03    0.15
  -5   0  -4    0.09    0.13
  -5   0  -4    0.24    0.31
  -5   0  -4    0.05    0.14
   5   0   5    0.04    0.16
  -5   0  -5    0.03    0.14
  -5   0  -5   -0.27    0.18
   5   0   6   34.65    2.14
  -5   0  -6   39.34    2.10
  -5   0  -6   41.22    2.51
  -5   0  -6   41.40    2.12
   5   0   7   -0.05    0.23
  -5   0  -7   -0.07    0.13
  -5   0  -7    0.04    0.18
  -5   0  -8  105.69    5.29
   5   0   8  108.42    5.36
  -5   0  -9    0.18    0.23
  -5   0  -9    0.24    0.24
   5   0   9   -0.05    0.26
   5   0   9    0.13    0.22
   5   0  10  184.96    8.79
   5   0  10  175.32    8.71
  -5   0 -10  192.41    8.76
  -5   0 -10  186.60    8.86
   5   0  10  177.16    8.89
   5   0  11    0.33    0.21
   5   0  11    0.06    0.21
   5   0  11    0.10    0.25
  -5   0 -11   -0.09    0.24
   5   0  12   22.97    1.61
  -5   0 -12   23.49    2.15
  -5   0 -12   25.29    1.63
  -5   0 -12   26.54    1.72
  -5   0 -13    0.57    0.41
   5   0  13    0.10    0.27
  -5   0 -13   -0.06    0.30
  -5   0 -13    0.15    0.28
  -5   0 -13   -0.11    0.31
  -5   0 -14   15.51    1.17
   5   0  14   16.36    1.16
  -5   0 -14   15.14    1.21
  -5   0 -14   13.74    1.58
  -5   0 -15    0.38    0.31
  -5   0 -15    0.05    0.26
   5   0  15   -0.04    0.27
  -5   0 -16    6.53    0.66
  -5   0 -16    7.31    0.71
   5   0  16    7.38    0.67
  -5   0 -17   -0.10    0.21
  -5   0 -17    0.15    0.19
   5   0  17   -0.06    0.21
  -5   0 -18    1.51    0.26
   5   0  18    2.17    0.27
  -5   0 -18    1.42    0.25
   5   0  19    0.11    0.08
   5  -1 -20    0.16    0.10
  -5  -1  20    0.04    0.09
  -5   1  20    0.04    0.07
   5  -1 -19   -0.03    0.18
   5  -1 -19   -0.02    0.15
  -5  -1  19    0.23    0.10
  -5   1  19    0.15    0.12
  -5   1  19   -0.02    0.12
  -5  -1  19    0.13    0.13
  -5   1  18    7.95    0.60
   5  -1 -18    7.73    0.66
  -5  -1  18    7.35    0.60
   5   1 -18    6.18    0.60
   5  -1 -18    5.82    0.60
   5  -1 -18    6.40    0.64
   5  -1 -18    8.01    0.72
  -5   1  18    8.27    0.60
  -5  -1  18    7.58    0.56
   5  -1 -17    0.18    0.23
  -5  -1  17    0.27    0.20
  -5  -1  17   -0.12    0.25
  -5   1  17   -0.04    0.21
  -5   1  17    0.07    0.19
   5   1 -17    0.24    0.24
   5  -1 -17    0.05    0.21
  -5  -1  16   16.17    1.14
  -5  -1  16   16.32    1.07
  -5   1  16   19.01    1.21
   5   1 -16   17.45    1.28
   5  -1 -16   17.73    1.28
   5  -1 -16   18.85    1.30
   5  -1 -15   25.13    1.69
  -5  -1  15   24.45    1.47
  -5  -1  15   24.48    1.57
   5  -1 -15   24.93    2.17
  -5  -1  15   25.26    1.51
   5  -1 -15   23.23    2.07
   5   1 -15   26.04    1.73
   5  -1 -15   26.24    1.73
  -5   1  15   28.91    1.64
  -5   1  14   54.02    2.68
  -5   1  14   40.51    2.86
   5   1 -14   41.91    3.08
   5  -1 -14   45.91    3.25
   5  -1 -14   43.68    3.24
  -5  -1  14   45.87    2.52
   5  -1 -14   48.56    2.73
  -5  -1  14   48.05    2.49
  -5   1  13   11.55    1.14
   5   1 -13   10.37    1.22
   5  -1 -13    8.26    1.20
   5  -1 -13   11.51    1.40
  -5  -1  13    9.63    0.81
  -5  -1  13   10.65    0.79
   5  -1 -13   10.78    0.95
  -5  -1  12    5.20    0.55
   5  -1 -12    6.29    0.68
  -5   1  12    6.09    0.62
  -5  -1  12    5.10    0.52
   5   1 -12    6.45    0.91
  -5   1  12    5.81    0.80
  -5   1  11    3.32    0.55
   5  -1 -11    3.34    0.49
  -5   1  11    4.31    0.49
  -5  -1  11    2.82    0.37
   5   1 -11    2.12    0.58
   5  -1 -11    3.69    0.68
  -5  -1  11    3.08    0.41
  -5   1  10   68.27    3.68
  -5  -1  10   62.53    3.32
  -5   1  10   71.88    3.40
   5  -1 -10   70.72    3.51
   5  -1 -10   67.26    3.92
   5   1 -10   63.64    3.82
  -5  -1  10   56.93    3.48
  -5   1   9  134.07    6.44
  -5  -1   9  126.09    6.34
  -5  -1   9  117.42    6.19
   5   1  -9  135.22    6.63
   5  -1  -9  137.44    6.74
   5   1  -8    6.58    0.80
   5  -1  -8    8.57    0.89
   5  -1  -8    7.65    0.70
  -5   1   8    8.29    0.77
  -5  -1   8    6.88    0.69
  -5  -1   8    6.70    0.69
  -5  -1   8    6.10    0.66
   5   1  -7  128.75    6.14
   5  -1  -7  131.35    6.18
   5  -1  -7  113.25    5.67
  -5  -1   7  119.83    5.98
  -5   1   7  125.21    5.95
  -5  -1   7  120.02    5.95
  -5  -1   7  120.16    5.95
   5   1  -6  144.78    7.03
   5  -1  -6  160.66    7.09
   5  -1  -6  164.67    7.38
   5   1  -6  138.60    6.85
  -5   1   6  148.74    6.87
  -5  -1   6  145.33    6.97
   5  -1  -6  144.52    6.67
  -5  -1   6  131.64    6.64
  -5  -1   6  137.10    6.87
  -5  -1   6  134.63    6.90
   5   1  -5  274.34   12.13
   5  -1  -5  282.54   12.14
   5   1  -5  238.98   11.89
   5  -1  -5  280.19   12.39
  -5   1   5  252.02   11.92
   5  -1  -5  252.43   11.79
  -5  -1   5  251.19   12.05
  -5  -1   5  244.32   11.77
  -5  -1   5  261.58   12.01
  -5  -1   5  265.04   12.06
   5  -1  -4    0.70    0.25
  -5   1   4    0.20    0.13
   5  -1  -4    0.19    0.23
   5   1  -4    0.16    0.13
  -5  -1   4    0.27    0.21
   5  -1  -4    0.14    0.18
  -5  -1   4    0.27    0.21
   5  -1  -3   94.04    4.56
   5  -1  -3   99.99    4.81
   5   1  -3   90.53    4.38
  -5  -1   3   90.07    4.55
   5  -1  -3   90.55    4.54
  -5  -1   3   89.03    4.58
   5  -1  -2  114.60    5.57
  -5  -1   2  107.80    5.39
   5  -1  -2  108.24    5.28
   5  -1  -1  174.23    7.95
   5  -1  -1  155.20    7.58
  -5  -1   1  162.23    7.76
  -5  -1   1  166.94    7.80
   5  -1   0  234.76   10.56
   5  -1   0  206.64   10.09
  -5  -1   0  232.94   10.44
  -5   1   0  243.73   10.48
  -5  -1  -1    5.95    0.62
  -5  -1  -1    7.42    0.67
  -5   1  -1    6.55    0.66
  -5  -1  -2   67.66    3.59
  -5   1  -2   69.40    3.60
   5  -1   2   68.74    3.33
  -5  -1  -2   68.11    3.53
  -5  -1  -3   26.13    1.44
  -5   1  -3   26.19    1.66
  -5  -1  -3   25.94    1.70
  -5  -1  -3   28.18    1.63
  -5  -1  -3   24.76    1.39
   5  -1   3   25.87    1.42
  -5  -1  -3   29.91    1.66
  -5  -1  -4   73.88    3.79
  -5   1  -4   74.87    3.77
  -5  -1  -4   82.01    3.99
  -5   1  -4   79.57    4.08
  -5  -1  -4   82.08    4.18
  -5  -1  -4   78.07    3.73
  -5  -1  -4   80.96    4.00
   5  -1   4   76.37    3.74
  -5  -1  -5   59.46    3.10
  -5   1  -5   65.37    3.11
   5   1   5   58.59    3.36
  -5  -1  -5   61.59    3.26
  -5   1  -5   66.28    3.45
  -5  -1  -5   71.58    3.63
  -5  -1  -5   57.56    3.01
   5  -1   5   62.60    3.03
  -5  -1  -5   61.88    3.29
  -5  -1  -6    5.31    0.51
  -5   1  -6    4.67    0.47
   5   1   6    5.35    0.65
  -5  -1  -6    5.19    0.58
  -5  -1  -6    5.70    0.75
   5  -1   6    4.75    0.57
  -5   1  -6    6.17    0.71
  -5  -1  -6    4.49    0.41
  -5  -1  -6    4.72    0.56
   5  -1   6    4.66    0.40
  -5  -1  -7    0.41    0.23
   5   1   7    0.39    0.31
  -5  -1  -7    0.79    0.24
  -5   1  -7    0.68    0.21
  -5  -1  -7    0.84    0.24
   5  -1   7    1.07    0.29
  -5   1  -7    1.18    0.38
   5  -1   8   61.96    3.03
   5  -1   8   54.12    2.94
   5   1   8   51.33    2.93
  -5  -1  -8   54.07    2.90
   5   1   8   61.67    3.28
  -5   1  -8   56.47    3.39
  -5   1  -8   54.46    2.94
  -5  -1  -8   57.92    2.98
  -5  -1  -9    2.29    0.40
  -5   1  -9    3.22    0.44
  -5  -1  -9    2.36    0.40
   5  -1   9    2.30    0.40
  -5  -1  -9    2.56    0.38
  -5   1  -9    3.21    0.42
  -5  -1  -9    2.36    0.37
   5   1   9    2.62    0.41
   5   1   9    2.73    0.55
   5  -1   9    3.19    0.44
  -5   1  -9    3.26    0.64
  -5  -1 -10    0.10    0.22
  -5  -1 -10   -0.05    0.24
  -5   1 -10   -0.05    0.25
   5  -1  10    0.25    0.23
  -5  -1 -10    0.36    0.23
  -5   1 -10    0.16    0.20
  -5  -1 -10    0.57    0.26
  -5  -1 -10   -0.08    0.21
   5   1  10   -0.08    0.33
   5  -1  10    0.47    0.26
   5   1  10    0.09    0.22
  -5   1 -10   -0.11    0.28
   5   1  11    2.56    0.54
   5   1  11    3.04    0.47
   5  -1  11    1.67    0.37
   5  -1  11    2.90    0.46
  -5   1 -11    3.26    0.49
  -5  -1 -11    2.69    0.45
  -5  -1 -11    2.50    0.45
  -5   1 -11    3.25    0.46
  -5  -1 -11    3.23    0.46
  -5  -1 -11    2.53    0.47
  -5   1 -11    2.20    0.57
  -5  -1 -11    1.88    0.65
  -5   1 -12    6.54    0.66
  -5  -1 -12    6.79    0.68
  -5  -1 -12    4.27    0.64
  -5   1 -12    4.86    0.64
   5  -1  12    6.15    0.66
   5   1  12    5.32    0.62
   5  -1  12    6.29    0.67
  -5  -1 -12    5.72    1.01
  -5   1 -12    4.69    0.86
  -5  -1 -12    5.34    0.66
   5   1  12    6.93    0.84
   5   1  13    0.71    0.32
  -5   1 -13    0.05    0.29
  -5  -1 -13    0.05    0.28
  -5  -1 -13    0.23    0.29
  -5   1 -13    0.44    0.29
  -5  -1 -13    0.70    0.43
  -5   1 -13    0.72    0.29
  -5  -1 -13    0.16    0.24
   5  -1  13    0.61    0.23
   5   1  13    0.33    0.28
   5  -1  13    0.44    0.28
  -5  -1 -14   29.05    1.92
   5  -1  14   34.33    1.95
   5   1  14   37.68    1.96
  -5  -1 -14   32.97    1.98
  -5   1 -14   35.25    1.95
   5  -1  14   29.00    1.72
  -5  -1 -14   30.37    1.97
  -5   1 -14   32.67    1.99
   5  -1  15   41.80    2.38
   5   1  15   44.42    2.37
  -5  -1 -15   41.06    2.44
  -5   1 -15   40.80    2.42
  -5   1 -15   41.21    2.36
  -5  -1 -15   45.18    2.45
  -5   1 -15   49.10    2.51
   5  -1  16    6.06    0.58
   5   1  16    6.91    0.59
  -5  -1 -16    6.50    0.64
  -5   1 -16    6.95    0.66
  -5   1 -16    6.07    0.58
  -5  -1 -16    6.88    0.65
  -5   1 -16    6.29    0.62
  -5  -1 -16    6.22    0.64
   5  -1  17   21.06    1.21
   5   1  17   19.79    1.18
  -5  -1 -17   21.41    1.25
  -5   1 -17   20.94    1.26
  -5  -1 -17   20.03    1.25
  -5   1 -17   20.99    1.24
  -5  -1 -17   21.64    1.27
  -5   1 -17   18.93    1.17
  -5  -1 -18   13.36    0.83
   5   1  18   12.58    0.75
   5  -1  18   13.43    0.78
  -5  -1 -18   12.14    0.79
  -5   1 -18   13.45    0.83
   5   1  18   14.21    0.77
   5  -1  18   13.77    0.77
  -5  -2  19    0.16    0.10
  -5   2  19    0.12    0.09
  -5  -2  19    0.09    0.11
   5  -2 -18    4.19    0.42
  -5   2  18    3.93    0.36
  -5  -2  18    2.98    0.27
  -5  -2  18    3.62    0.33
  -5   2  18    4.15    0.37
   5  -2 -18    3.60    0.39
  -5  -2  18    4.78    0.39
  -5   2  17    7.18    0.59
   5  -2 -17    7.38    0.65
  -5  -2  17    6.56    0.56
  -5  -2  17    7.35    0.55
  -5   2  17    8.41    0.61
   5  -2 -17    7.11    0.65
   5  -2 -17    6.94    0.66
  -5  -2  17    7.00    0.60
   5  -2 -16    4.38    0.57
  -5   2  16    4.40    0.50
  -5  -2  16    4.92    0.53
  -5  -2  16    5.38    0.50
  -5   2  16    5.22    0.53
   5  -2 -16    5.15    0.59
   5   2 -16    4.23    0.48
   5  -2 -16    5.82    0.67
  -5  -2  16    6.38    0.61
   5  -2 -15   44.14    2.42
  -5   2  15   43.44    2.30
   5  -2 -15   40.22    2.28
   5   2 -15   40.07    2.30
  -5  -2  15   37.73    2.24
  -5  -2  15   41.77    2.32
  -5   2  15   42.63    2.30
   5  -2 -15   39.84    2.42
   5  -2 -15   45.80    2.57
  -5   2  14   25.51    1.56
   5  -2 -14   25.63    1.68
  -5  -2  14   23.44    1.56
   5   2 -14   24.17    1.59
   5  -2 -14   25.99    1.59
  -5  -2  14   25.06    1.37
  -5  -2  14   24.35    1.55
   5  -2 -14   24.79    1.68
   5  -2 -14   24.87    1.79
  -5   2  14   25.10    1.58
  -5   2  13    4.98    0.59
   5  -2 -13    6.00    0.68
  -5   2  13    4.82    0.56
  -5  -2  13    5.30    0.61
  -5  -2  13    3.22    0.51
  -5  -2  13    4.72    0.44
   5   2 -13    4.19    0.55
   5  -2 -13    4.05    0.78
   5  -2 -13    5.23    0.59
  -5   2  13    4.70    0.69
   5  -2 -13    3.76    0.81
   5  -2 -13    4.13    0.70
   5  -2 -13    3.32    0.57
   5  -2 -12   61.13    3.08
  -5   2  12   60.16    3.07
   5  -2 -12   57.77    3.17
  -5   2  12   60.21    3.04
  -5  -2  12   53.17    3.05
  -5  -2  12   55.04    3.04
  -5  -2  12   55.76    2.87
   5  -2 -12   53.84    3.56
   5  -2 -12   57.82    3.08
   5  -2 -12   51.23    3.74
  -5   2  12   56.71    3.34
   5  -2 -12   56.94    3.80
   5  -2 -12   51.12    3.14
   5  -2 -11   88.81    5.42
   5  -2 -11   88.00    5.49
  -5   2  11   95.75    5.07
  -5  -2  11   91.06    4.75
  -5  -2  11   99.53    4.61
   5  -2 -11   89.42    5.28
   5  -2 -11   87.22    4.85
  -5   2  11   99.11    4.77
  -5   2  11  101.63    4.75
   5  -2 -11   91.39    4.84
  -5  -2  11   88.80    5.10
   5  -2 -11   95.11    4.78
  -5  -2  11   93.31    4.79
   5  -2 -10   38.79    2.78
  -5   2  10   37.13    2.30
  -5  -2  10   31.98    2.04
  -5  -2  10   37.76    1.95
   5  -2 -10   33.89    2.14
   5  -2 -10   34.63    2.49
   5   2 -10   32.70    2.33
  -5  -2  10   37.54    1.98
   5  -2 -10   34.30    2.08
  -5   2  10   37.54    2.07
  -5   2  10   39.99    2.07
   5  -2 -10   36.33    2.18
  -5  -2  10   34.65    2.08
  -5  -2  10   32.53    2.34
   5  -2 -10   30.24    2.53
   5  -2  -9    9.08    1.17
  -5   2   9    9.72    0.92
  -5  -2   9    8.94    0.69
  -5  -2   9    8.44    0.75
  -5  -2   9    7.43    0.83
  -5  -2   9    8.36    0.68
   5  -2  -9    8.56    0.98
   5   2  -9    9.54    0.98
   5  -2  -9    7.71    0.79
   5  -2  -9   10.32    0.82
  -5   2   9   10.14    0.80
  -5   2   9    9.06    0.73
   5  -2  -9    8.36    0.81
  -5  -2   9    7.59    0.73
   5  -2  -9    7.92    1.09
  -5  -2   9    8.72    0.97
   5  -2  -8  176.35    8.49
   5   2  -8  161.76    8.32
   5  -2  -8  163.84    8.40
  -5  -2   8  158.33    8.42
   5  -2  -8  175.75    8.82
  -5   2   8  182.04    8.26
   5  -2  -8  167.08    8.33
  -5  -2   8  158.20    8.02
  -5  -2   8  173.39    7.94
  -5  -2   8  155.97    8.30
  -5  -2   8  184.42    7.95
   5  -2  -8  160.42    8.40
  -5   2   8  171.88    8.03
   5  -2  -8  168.72    8.15
  -5   2   8  175.13    8.00
  -5  -2   8  159.15    8.05
  -5  -2   8  157.85    8.35
   5  -2  -8  162.50    7.93
   5  -2  -8  163.77    8.63
   5  -2  -8  174.38    8.10
  -5  -2   7   34.89    2.02
   5  -2  -7   35.41    1.97
   5  -2  -7   42.43    2.69
  -5   2   7   38.20    2.16
   5  -2  -7   38.24    2.51
  -5  -2   7   32.03    2.31
   5  -2  -7   37.49    2.00
   5  -2  -7   36.70    2.35
  -5  -2   7   37.25    2.06
   5  -2  -7   38.91    2.46
  -5   2   7   39.83    2.05
   5  -2  -7   36.40    2.13
  -5  -2   7   33.42    2.03
  -5  -2   7   39.22    1.97
  -5  -2   7   33.90    2.31
   5  -2  -7   36.33    2.32
   5   2  -7   36.63    2.27
  -5  -2   7   35.71    2.06
  -5  -2   7   39.34    2.42
   5  -2  -7   35.45    2.40
   5  -2  -6   14.50    1.33
   5  -2  -6   16.87    1.23
   5   2  -6   14.78    1.16
   5  -2  -6   15.45    1.44
  -5   2   6   16.55    1.08
  -5  -2   6   15.49    1.32
   5  -2  -6   14.40    1.30
   5  -2  -6   14.54    0.98
  -5  -2   6   14.72    1.26
   5  -2  -6   15.25    1.33
  -5  -2   6   13.34    0.98
  -5  -2   6   14.19    1.24
   5  -2  -6   14.30    1.27
   5  -2  -5   62.50    3.62
   5   2  -5   58.84    3.31
   5  -2  -5   64.86    3.35
   5  -2  -5   63.99    3.74
  -5   2   5   62.87    3.15
  -5  -2   5   54.03    3.46
   5  -2  -5   64.58    3.56
   5  -2  -5   63.90    3.14
  -5  -2   5   65.03    3.51
  -5  -2   5   58.22    3.14
  -5  -2   5   56.43    3.44
   5  -2  -5   63.61    3.54
   5  -2  -4   53.75    3.15
   5  -2  -4   49.52    2.74
   5  -2  -4   58.81    3.24
  -5  -2   4   51.12    3.02
   5  -2  -4   51.25    2.95
   5  -2  -4   50.93    2.65
  -5  -2   4   50.42    2.95
  -5  -2   4   47.97    2.64
  -5  -2   4   48.15    2.97
   5  -2  -4   52.07    3.04
   5  -2  -3  264.53   12.51
   5  -2  -3  308.48   13.13
   5  -2  -3  272.38   12.75
  -5  -2   3  249.78   12.85
   5  -2  -3  268.70   12.47
  -5  -2   3  278.62   12.84
  -5  -2   3  249.92   12.46
  -5  -2   3  259.73   12.84
   5  -2  -3  298.95   12.99
  -5  -2   2   12.18    1.11
   5  -2  -2   11.86    0.84
   5  -2  -2   12.46    1.17
  -5  -2   2   11.60    0.85
   5  -2  -2   13.33    1.19
   5  -2  -2   11.17    0.95
   5  -2  -2   11.51    0.81
   5  -2  -1  193.13   10.21
   5  -2  -1  250.46   10.92
   5  -2  -1  235.45   10.30
   5  -2  -1  253.08   10.36
  -5  -2   1  204.88   10.31
  -5  -2   1  222.46   10.74
   5  -2  -1  219.85   10.33
   5  -2  -1  237.00   10.82
  -5  -2   1  215.15   10.68
   5  -2   0  183.27    8.66
   5  -2   0  191.31    8.61
  -5  -2   0  170.78    8.68
   5  -2   0  197.81    9.13
  -5  -2   0  172.46    8.93
   5  -2   1  221.51   10.25
  -5  -2  -1  214.55   10.24
   5  -2   1  225.18   10.10
  -5  -2  -1  210.83   10.10
   5  -2   1  211.30   10.09
  -5  -2  -1  208.35   10.45
   5  -2   2  257.73   11.81
   5  -2   2  259.23   11.56
  -5  -2  -2  225.51   11.54
  -5  -2  -2  243.37   11.96
   5  -2   2  249.70   11.56
   5  -2   2  270.77   12.07
  -5  -2  -2  251.93   11.75
  -5   2  -2  242.09   11.69
  -5  -2  -2  245.32   11.92
  -5  -2  -3  187.23    8.56
   5  -2   3  178.73    8.63
  -5  -2  -3  181.54    9.05
  -5  -2  -3  188.32    9.03
  -5  -2  -3  185.93    8.66
   5  -2   3  181.63    8.63
  -5  -2  -3  181.28    8.86
  -5   2  -3  169.12    8.75
   5  -2   3  184.50    9.08
   5  -2   3  202.86    9.28
   5  -2   4   86.36    4.55
  -5  -2  -4   77.91    3.90
   5   2   4   78.76    4.38
   5  -2   4   80.75    3.96
  -5  -2  -4   83.45    4.40
   5  -2   4   81.24    3.99
  -5  -2  -4   80.59    3.99
  -5  -2  -4   80.04    4.33
   5  -2   4   88.22    4.53
  -5  -2  -4   77.80    4.24
  -5   2  -4   70.05    4.08
   5  -2   4   80.90    4.39
   5  -2   5  526.27   23.39
   5  -2   5  488.63   22.81
   5  -2   5  485.81   22.84
  -5  -2  -5  511.32   22.86
  -5  -2  -5  517.36   23.25
  -5  -2  -5  493.25   23.27
   5  -2   5  491.47   22.81
   5  -2   5  507.84   23.26
  -5   2  -5  429.02   22.97
  -5  -2  -5  514.51   23.24
  -5  -2  -5  513.61   22.80
   5  -2   5  521.45   23.43
  -5  -2  -6    2.25    0.35
  -5  -2  -6    1.77    0.34
   5  -2   6    2.29    0.40
  -5  -2  -6    1.70    0.48
   5  -2   6    1.77    0.49
   5  -2   6    2.62    0.37
  -5  -2  -6    2.98    0.56
  -5   2  -6    2.66    0.44
   5  -2   6    2.03    0.33
   5  -2   6    2.63    0.57
  -5  -2  -6    2.74    0.42
   5  -2   6    2.89    0.45
  -5  -2  -6    2.53    0.52
   5  -2   6    2.98    0.38
   5  -2   6    2.60    0.52
  -5  -2  -7   16.63    1.42
   5  -2   7   18.58    1.12
  -5  -2  -7   20.95    1.25
  -5  -2  -7   16.72    1.39
  -5   2  -7   16.27    1.35
   5  -2   7   23.00    1.50
  -5  -2  -7   20.20    1.64
   5  -2   7   18.03    1.18
   5  -2   7   20.41    1.27
   5  -2   7   19.18    1.14
  -5  -2  -7   19.59    1.21
  -5  -2  -7   16.77    1.29
   5  -2   7   18.08    1.49
  -5  -2  -7   18.35    1.26
  -5  -2  -7   16.15    1.17
  -5  -2  -7   19.65    1.23
   5  -2   7   17.60    1.46
   5  -2   7   22.38    1.40
   5  -2   7   20.68    1.23
   5   2   8   71.30    3.95
  -5  -2  -8   60.54    3.41
   5  -2   8   70.84    3.45
  -5  -2  -8   70.34    4.03
   5  -2   8   69.20    3.36
  -5  -2  -8   64.66    3.49
  -5  -2  -8   67.93    3.61
  -5  -2  -8   70.43    3.47
  -5   2  -8   61.48    3.34
   5   2   9    9.01    1.03
  -5  -2  -9    7.92    0.74
  -5  -2  -9    7.29    0.66
   5  -2   9    8.38    0.72
  -5  -2  -9    7.43    1.00
   5  -2   9    8.77    0.66
  -5  -2  -9    6.78    0.71
  -5  -2  -9    7.95    0.82
  -5  -2  -9    7.67    0.71
  -5   2  -9    7.30    0.65
   5   2  10   20.09    1.72
  -5  -2 -10   19.47    1.34
  -5   2 -10   25.13    1.41
   5  -2  10   22.33    1.39
   5   2  10   19.47    1.31
   5  -2  10   24.26    1.57
  -5  -2 -10   21.29    1.89
   5  -2  10   21.10    1.27
  -5  -2 -10   21.46    1.42
  -5  -2 -10   21.74    1.44
  -5  -2 -10   22.43    1.56
  -5  -2 -10   23.74    1.46
  -5   2 -10   19.45    1.31
   5   2  11  110.88    5.83
  -5  -2 -11  108.29    5.38
  -5  -2 -11  109.27    5.38
  -5  -2 -11   94.86    5.28
  -5   2 -11  123.01    5.35
   5   2  11   96.63    5.22
   5  -2  11  110.33    5.33
   5  -2  11  127.60    5.56
  -5  -2 -11  104.49    6.08
   5  -2  11  116.88    5.17
  -5  -2 -11  108.97    5.38
  -5   2 -11   93.64    5.23
  -5  -2 -11  102.35    5.50
  -5  -2 -12   14.95    1.18
  -5  -2 -12   16.99    1.15
  -5  -2 -12   17.41    1.17
  -5   2 -12   16.04    1.06
  -5  -2 -12   14.20    1.07
  -5  -2 -12   15.53    1.11
  -5   2 -12   13.19    1.00
   5  -2  12   12.60    0.99
   5  -2  12   15.03    1.06
   5   2  12   12.64    0.98
  -5  -2 -12   15.93    1.49
   5   2  12   13.58    1.34
  -5  -2 -13    1.20    0.32
  -5   2 -13    1.15    0.29
  -5  -2 -13    1.05    0.29
  -5  -2 -13    0.80    0.33
   5  -2  13    1.03    0.27
  -5  -2 -13    1.09    0.30
   5  -2  13    0.78    0.27
   5   2  13    0.82    0.23
   5  -2  13    0.60    0.21
  -5  -2 -13    1.99    0.43
  -5  -2 -14    9.10    0.79
  -5  -2 -14    8.74    0.71
  -5   2 -14    8.05    0.68
  -5  -2 -14    8.15    0.76
   5   2  14    7.81    0.63
   5  -2  14    9.45    0.70
   5  -2  14    8.85    0.67
  -5  -2 -14    7.58    0.70
  -5  -2 -15    0.19    0.18
  -5  -2 -15   -0.12    0.23
   5   2  15    0.12    0.11
   5  -2  15    0.27    0.17
  -5   2 -15    0.24    0.22
  -5  -2 -15    0.26    0.25
  -5   2 -15   -0.14    0.18
  -5  -2 -16    3.97    0.41
   5  -2  16    3.24    0.31
  -5   2 -16    4.26    0.42
  -5  -2 -16    3.48    0.40
   5   2  17    1.27    0.20
  -5   2 -17    1.00    0.19
  -5  -3  17    2.54    0.24
  -5  -3  17    3.17    0.26
  -5  -3  17    3.00    0.25
  -5  -3  17    2.75    0.26
  -5   3  17    2.82    0.24
  -5   3  16    0.57    0.15
  -5   3  16    0.51    0.15
  -5  -3  16    0.59    0.18
  -5  -3  16    0.53    0.19
  -5  -3  16    0.68    0.18
  -5  -3  16    0.57    0.18
   5  -3 -16    0.67    0.19
   5  -3 -16    0.68    0.21
  -5  -3  15    3.24    0.42
  -5  -3  15    4.31    0.44
  -5  -3  15    4.47    0.46
  -5  -3  15    4.24    0.43
  -5   3  15    3.52    0.36
  -5   3  15    4.32    0.41
   5  -3 -15    4.21    0.52
   5  -3 -15    3.75    0.44
  -5   3  14   56.69    2.96
  -5  -3  14   61.28    3.08
  -5  -3  14   58.84    3.04
  -5  -3  14   61.81    3.10
  -5  -3  14   60.26    2.88
  -5  -3  14   62.30    3.06
  -5   3  14   54.28    2.92
   5  -3 -14   59.20    3.00
   5  -3 -14   55.37    3.07
   5  -3 -14   60.48    3.24
  -5   3  13   45.48    2.32
  -5  -3  13   46.51    2.40
  -5  -3  13   45.47    2.44
  -5  -3  13   44.17    2.43
   5  -3 -13   38.58    2.35
  -5  -3  13   45.67    2.25
  -5  -3  13   43.73    2.40
  -5   3  13   41.41    2.26
   5  -3 -13   41.44    2.42
   5  -3 -13   43.42    2.38
   5  -3 -13   37.98    2.39
   5  -3 -13   45.26    2.62
  -5   3  12   34.89    1.86
  -5   3  12   31.90    1.79
   5  -3 -12   33.18    1.98
  -5  -3  12   30.16    1.85
  -5  -3  12   31.50    1.90
  -5  -3  12   32.45    1.97
  -5  -3  12   31.13    1.95
  -5  -3  12   34.12    1.79
  -5  -3  12   33.46    1.95
   5  -3 -12   29.88    1.95
   5  -3 -12   32.17    1.93
   5  -3 -11    4.34    0.59
  -5   3  11    4.29    0.51
  -5   3  11    5.30    0.51
   5  -3 -11    4.88    0.64
  -5  -3  11    6.26    0.56
   5  -3 -11    6.23    0.94
  -5  -3  11    3.85    0.52
  -5  -3  11    4.91    0.59
  -5  -3  11    4.20    0.61
  -5  -3  11    3.40    0.55
   5  -3 -11    4.73    0.62
  -5  -3  11    4.05    0.59
  -5  -3  10  178.60    7.96
  -5  -3  10  172.01    8.11
   5  -3 -10  155.19    8.14
   5  -3 -10  167.88    8.37
   5  -3 -10  159.54    8.84
   5  -3 -10  168.54    8.13
  -5   3  10  162.41    7.95
  -5   3  10  155.56    7.89
   5  -3 -10  159.69    8.13
  -5  -3  10  169.39    8.15
   5  -3 -10  151.65    8.75
  -5  -3  10  168.98    8.13
  -5  -3  10  166.22    8.04
  -5  -3  10  182.38    7.95
  -5  -3  10  164.35    8.05
  -5  -3  10  144.95    7.91
  -5  -3  10  155.74    8.58
  -5  -3   9   39.23    2.01
  -5  -3   9   34.86    2.10
   5  -3  -9   31.31    2.58
  -5  -3   9   35.47    2.14
  -5  -3   9   40.44    1.99
  -5  -3   9   32.83    2.04
  -5  -3   9   39.43    2.12
   5  -3  -9   32.91    2.61
   5  -3  -9   29.52    2.11
   5  -3  -9   34.91    2.36
   5  -3  -9   46.57    2.20
   5  -3  -9   37.84    2.17
  -5   3   9   33.82    1.98
  -5   3   9   30.72    1.90
   5  -3  -9   35.37    2.17
  -5  -3   9   37.83    2.17
  -5  -3   9   33.85    2.53
  -5  -3   9   31.64    1.99
  -5  -3   8    0.63    0.42
   5  -3  -8    0.86    0.27
   5  -3  -8    0.88    0.41
   5  -3  -8    0.23    0.25
   5  -3  -8    0.97    0.48
  -5  -3   8    1.64    0.41
  -5  -3   8    0.66    0.28
   5  -3  -8    0.74    0.38
   5  -3  -8    0.73    0.27
  -5  -3   8    0.63    0.26
  -5  -3   8    0.87    0.31
  -5  -3   8    0.68    0.28
   5  -3  -8    2.02    0.51
  -5  -3   8    0.85    0.31
   5  -3  -8    0.61    0.26
   5  -3  -8    0.39    0.29
   5  -3  -8    1.70    0.40
  -5   3   8    0.22    0.19
   5  -3  -8    1.46    0.39
  -5  -3   8    0.65    0.33
  -5  -3   8    0.61    0.31
   5  -3  -8    0.78    0.33
  -5  -3   8    1.02    0.33
   5  -3  -8    1.06    0.37
  -5  -3   8    0.54    0.28
  -5  -3   8    0.35    0.27
   5  -3  -7   71.19    3.67
   5  -3  -7   64.42    4.25
   5  -3  -7   74.46    4.44
  -5  -3   7   70.43    3.61
  -5  -3   7   72.54    3.76
  -5  -3   7   66.00    4.11
   5  -3  -7   69.43    3.64
   5  -3  -7   71.06    4.14
  -5  -3   7   65.25    3.67
  -5  -3   7   68.89    3.70
  -5  -3   7   68.47    3.76
  -5  -3   7   76.46    3.57
  -5  -3   7   66.99    3.66
   5  -3  -7   62.07    3.75
   5  -3  -7   72.61    4.02
   5  -3  -7   71.73    4.31
   5  -3  -7   66.37    3.71
  -5   3   7   65.71    3.58
  -5  -3   7   76.94    3.80
  -5  -3   7   63.79    3.65
  -5  -3   7   67.93    3.69
   5  -3  -7   70.62    4.26
  -5  -3   7   73.02    4.29
   5  -3  -7   71.63    3.74
  -5  -3   7   72.08    3.78
  -5  -3   7   77.30    3.58
  -5  -3   7   91.91    3.82
   5  -3  -7   89.45    3.87
   5  -3  -7   78.08    3.86
   5  -3  -6    0.11    0.30
  -5  -3   6    0.65    0.28
  -5  -3   6    0.61    0.43
  -5  -3   6    0.82    0.41
   5  -3  -6    0.62    0.28
   5  -3  -6    1.28    0.48
  -5  -3   6    0.86    0.26
   5  -3  -6    0.18    0.27
   5  -3  -6    0.20    0.37
  -5  -3   6    0.45    0.22
  -5  -3   6    0.50    0.23
  -5  -3   6    0.66    0.28
   5  -3  -6    0.59    0.36
  -5  -3   6    0.66    0.32
   5  -3  -6    0.58    0.29
   5  -3  -6    1.20    0.45
   5  -3  -6    0.55    0.36
  -5  -3   6    0.35    0.24
   5  -3  -6    0.85    0.34
  -5  -3   6    0.71    0.26
  -5  -3   6    0.32    0.27
  -5  -3   6    0.99    0.31
  -5  -3   6    0.81    0.35
  -5  -3   6    0.78    0.31
  -5  -3   6    1.16    0.32
   5  -3  -6    0.18    0.27
   5  -3  -6    1.18    0.44
  -5  -3   5    0.41    0.24
  -5  -3   5    0.61    0.44
  -5  -3   5    0.30    0.20
  -5  -3   5   -0.05    0.27
  -5  -3   5    0.50    0.34
   5  -3  -5    0.12    0.33
   5  -3  -5    0.21    0.27
  -5  -3   5    0.69    0.24
   5  -3  -5    0.85    0.48
   5  -3  -5    0.55    0.29
  -5  -3   5    0.08    0.17
  -5  -3   5    0.34    0.20
  -5  -3   5   -0.04    0.22
   5  -3  -5    0.14    0.29
  -5  -3   5    0.29    0.28
   5  -3  -5    0.38    0.27
   5  -3  -5    0.38    0.40
  -5  -3   5    0.37    0.25
   5  -3  -5    0.33    0.27
  -5  -3   5    0.32    0.23
  -5  -3   5    0.34    0.23
   5  -3  -5    0.35    0.32
  -5  -3   5    0.48    0.28
  -5  -3   5    0.41    0.28
  -5  -3   5    0.30    0.25
   5  -3  -5    0.19    0.27
   5  -3  -5    0.34    0.35
   5  -3  -4   42.95    2.40
  -5  -3   4   39.65    2.40
  -5  -3   4   43.50    2.25
  -5  -3   4   39.43    2.80
   5  -3  -4   45.69    3.06
  -5  -3   4   47.01    2.92
   5  -3  -4   41.25    2.48
   5  -3  -4   42.01    2.89
  -5  -3   4   39.75    2.37
  -5  -3   4   41.32    2.39
  -5  -3   4   36.66    2.27
   5  -3  -4   42.03    2.57
  -5  -3   4   47.94    2.52
  -5  -3   4   51.48    2.39
   5  -3  -4   40.60    2.98
   5  -3  -4   45.10    2.50
  -5  -3   4   35.77    2.29
   5  -3  -4   51.17    2.53
   5  -3  -4   49.31    2.52
  -5  -3   4   43.66    2.47
  -5  -3   4   40.05    2.38
  -5  -3   4   37.10    2.34
  -5  -3   4   41.27    2.40
  -5  -3   4   47.90    2.31
   5  -3  -4   42.02    2.42
  -5  -3   4   38.18    2.31
   5  -3  -4   46.84    3.01
  -5  -3   3    3.47    0.51
  -5  -3   3    4.29    0.77
  -5  -3   3    3.90    0.41
  -5  -3   3    3.54    0.54
   5  -3  -3    3.28    0.56
   5  -3  -3    4.64    0.89
   5  -3  -3    4.93    0.86
   5  -3  -3    3.44    0.51
  -5  -3   3    4.76    0.54
  -5  -3   3    3.45    0.47
  -5  -3   3    4.86    0.60
   5  -3  -3    5.05    0.64
  -5  -3   3    3.07    0.49
  -5  -3   3    4.53    0.50
   5  -3  -3    2.84    0.51
  -5  -3   3    4.77    0.59
   5  -3  -3    5.18    0.86
  -5  -3   3    3.61    0.48
   5  -3  -3    5.19    0.60
   5  -3  -3    4.48    0.56
  -5  -3   3    3.75    0.53
  -5  -3   3    4.54    0.54
  -5  -3   3    4.56    0.48
  -5  -3   3    3.47    0.48
  -5  -3   3    3.95    0.50
  -5  -3   3    4.62    0.51
  -5  -3   3    5.09    0.82
   5  -3  -3    5.24    0.59
   5  -3  -3    3.57    0.69
   5  -3  -2   17.07    1.23
  -5  -3   2   13.87    1.17
  -5  -3   2   16.59    1.05
  -5  -3   2   19.70    1.22
   5  -3  -2   13.89    1.23
   5  -3  -2   17.93    1.63
  -5  -3   2   15.67    1.18
  -5  -3   2   19.75    1.28
   5  -3  -2   17.88    1.32
  -5  -3   2   16.26    1.24
  -5  -3   2   20.05    1.19
   5  -3  -2   14.39    1.23
  -5  -3   2   15.13    1.14
   5  -3  -2   21.86    1.33
   5  -3  -2   19.75    1.31
  -5  -3   2   14.46    1.08
  -5  -3   2   14.93    1.17
  -5  -3   2   16.30    1.25
  -5  -3   2   17.10    1.12
  -5  -3   2   19.50    1.20
  -5  -3   2   22.91    1.31
  -5  -3   2   17.46    1.63
   5  -3  -2   17.30    1.23
   5  -3  -2   15.55    1.54
   5  -3  -2   20.49    1.31
  -5  -3   2   15.17    1.12
   5  -3  -1   26.86    1.70
  -5  -3   1   26.54    1.71
   5  -3  -1   29.04    2.22
  -5  -3   1   24.11    1.66
  -5  -3   1   26.91    1.76
   5  -3  -1   25.54    1.77
  -5  -3   1   29.57    1.73
   5  -3  -1   31.50    2.38
  -5  -3   1   27.31    1.69
  -5  -3   1   31.89    1.68
  -5  -3   1   24.99    1.65
  -5  -3   1   24.42    1.59
  -5  -3   1   25.59    1.67
  -5  -3   1   28.17    1.79
  -5  -3   1   25.09    1.66
  -5  -3   1   33.44    1.66
  -5  -3   1   28.76    1.65
  -5  -3   1   28.70    1.71
  -5  -3   1   26.13    1.64
  -5  -3   1   29.20    1.52
  -5  -3   1   23.80    2.03
  -5  -3   1   25.30    2.12
   5  -3  -1   27.97    1.72
   5  -3  -1   25.75    1.72
   5  -3   0    2.52    0.47
   5  -3   0    4.17    0.81
  -5  -3   0    2.91    0.63
  -5  -3   0    2.71    0.31
  -5  -3   0    1.83    0.41
   5  -3   0    2.75    0.46
  -5  -3   0    2.56    0.40
  -5  -3   0    2.35    0.42
   5  -3   0    2.18    0.45
  -5  -3   0    3.47    0.49
   5  -3   0    3.53    0.77
  -5  -3   0    1.81    0.39
  -5  -3   0    2.65    0.44
   5  -3   0    2.51    0.46
  -5  -3   0    3.03    0.44
  -5  -3   0    2.84    0.42
  -5  -3   0    2.92    0.40
   5  -3   0    2.46    0.43
  -5  -3   0    2.56    0.39
  -5  -3   0    2.75    0.43
   5  -3   1    0.05    0.21
  -5  -3  -1    0.16    0.14
  -5  -3  -1    0.20    0.34
  -5  -3  -1    0.25    0.27
   5  -3   1   -0.33    0.56
   5  -3   1   -0.14    0.30
   5  -3   1    0.37    0.17
   5  -3   1   -0.17    0.26
   5  -3   1    0.50    0.44
  -5  -3  -1    0.35    0.20
  -5  -3  -1    0.28    0.24
  -5  -3  -1   -0.09    0.24
   5  -3   1    0.23    0.27
  -5  -3  -1    0.15    0.22
  -5  -3  -1   -0.16    0.28
   5  -3   1    0.52    0.42
  -5  -3  -1   -0.09    0.23
  -5  -3  -1    0.05    0.24
  -5  -3  -1    0.05    0.25
   5  -3   1    0.27    0.22
  -5  -3  -1   -0.09    0.24
  -5  -3  -1    0.08    0.21
  -5  -3  -1   -0.15    0.23
   5  -3   1   -0.10    0.29
  -5  -3  -1    0.11    0.35
  -5  -3  -1    0.18    0.26
  -5  -3  -1   -0.13    0.26
  -5  -3  -1    0.18    0.23
   5  -3   2   12.80    0.97
  -5  -3  -2   10.16    1.24
   5   3   2   11.00    1.18
   5  -3   2   11.71    0.95
  -5  -3  -2   10.56    0.88
  -5  -3  -2   12.78    1.29
   5  -3   2   11.20    1.33
   5  -3   2   11.65    1.07
   5  -3   2   11.80    0.99
  -5  -3  -2   10.57    0.92
   5  -3   2   11.05    0.93
   5  -3   2   11.81    0.95
   5  -3   2   12.79    1.34
  -5  -3  -2   12.04    0.94
  -5  -3  -2   10.43    0.91
  -5  -3  -2   12.15    0.93
  -5  -3  -2   11.69    1.00
  -5  -3  -2   14.06    0.93
   5  -3   2   12.53    1.43
   5  -3   2   10.53    0.97
  -5  -3  -2   10.13    0.89
  -5  -3  -2   11.04    0.92
  -5  -3  -2   10.33    0.91
  -5  -3  -2   13.47    0.88
   5  -3   2   10.76    0.95
  -5  -3  -2   12.95    0.99
  -5  -3  -2   11.99    0.85
   5  -3   2   10.84    0.89
  -5  -3  -2    9.42    0.88
  -5  -3  -2   10.35    0.91
   5  -3   3   16.43    1.15
   5   3   3   13.28    1.37
  -5  -3  -3   15.10    1.46
   5  -3   3   16.44    1.63
   5  -3   3   14.93    1.18
   5  -3   3   15.51    1.33
   5  -3   3   14.86    1.11
   5  -3   3   14.31    1.10
  -5  -3  -3   14.27    1.12
   5  -3   3   15.67    1.52
  -5  -3  -3   13.74    1.08
  -5  -3  -3   17.46    1.18
  -5  -3  -3   14.07    1.07
  -5  -3  -3   13.45    1.16
  -5  -3  -3   17.19    1.09
   5  -3   3   15.56    1.62
   5  -3   3   13.90    1.14
  -5  -3  -3   13.76    1.08
  -5  -3  -3   14.76    1.21
  -5  -3  -3   15.43    1.14
  -5  -3  -3   15.01    1.12
  -5  -3  -3   16.52    1.03
   5  -3   3   14.37    1.10
  -5  -3  -3   17.13    1.03
   5  -3   3   13.67    1.07
  -5  -3  -3   14.08    1.11
  -5  -3  -3   13.89    1.10
   5   3   4  106.34    6.00
  -5  -3  -4  111.11    6.02
   5  -3   4  114.47    6.24
   5  -3   4  114.13    5.96
   5  -3   4  105.80    5.56
   5  -3   4  106.75    5.49
   5  -3   4  116.71    5.51
  -5  -3  -4  119.62    5.57
   5  -3   4  110.02    6.05
  -5  -3  -4  106.26    5.49
   5  -3   4   96.80    5.45
  -5  -3  -4  107.97    5.47
  -5  -3  -4  109.89    5.65
   5  -3   4  122.71    6.38
   5  -3   4  107.77    5.58
  -5  -3  -4  108.07    5.51
  -5  -3  -4  103.71    5.52
  -5  -3  -4  121.25    5.74
  -5  -3  -4  121.43    5.58
  -5  -3  -4  114.79    5.53
   5  -3   4  104.85    5.50
   5  -3   4   97.87    5.43
  -5  -3  -4  130.30    5.44
   5  -3   4  118.26    5.52
   5  -3   5  157.64    7.20
   5   3   5  152.81    7.79
  -5  -3  -5  137.47    7.65
   5  -3   5  150.81    7.92
   5  -3   5  140.10    7.67
   5  -3   5  141.34    7.27
   5  -3   5  154.26    7.19
   5  -3   5  134.49    7.18
  -5  -3  -5  157.20    7.26
   5  -3   5  156.58    7.79
  -5  -3  -5  153.94    7.23
   5  -3   5  135.39    7.17
  -5  -3  -5  138.26    7.35
   5  -3   5  151.48    7.96
   5  -3   5  146.65    7.27
  -5  -3  -5  142.10    7.25
  -5  -3  -5  158.42    7.28
  -5  -3  -5  143.01    7.39
  -5  -3  -5  147.57    7.21
  -5  -3  -5  168.50    7.12
   5  -3   5  147.79    7.27
  -5  -3  -5  148.91    7.24
   5   3   6    4.10    0.78
  -5  -3  -6    3.26    0.70
  -5  -3  -6    2.91    0.59
   5  -3   6    3.15    0.49
   5  -3   6    3.92    0.73
   5  -3   6    2.75    0.67
   5  -3   6    2.38    0.50
   5  -3   6    2.41    0.61
   5  -3   6    3.29    0.47
   5  -3   6    2.54    0.47
  -5  -3  -6    3.76    0.51
   5  -3   6    3.26    0.50
   5  -3   6    3.97    0.75
  -5  -3  -6    2.69    0.53
  -5  -3  -6    3.11    0.57
  -5  -3  -6    4.14    0.57
  -5  -3  -6    3.35    0.49
   5  -3   6    2.82    0.51
   5  -3   6    3.55    0.47
  -5  -3  -6    2.87    0.54
  -5  -3  -6    3.22    0.53
   5  -3   7    5.74    0.56
   5  -3   7    3.79    0.57
  -5  -3  -7    5.67    0.77
   5   3   7    5.66    0.86
   5  -3   7    6.20    0.80
   5  -3   7    4.58    0.82
   5  -3   7    5.97    0.55
  -5  -3  -7    5.36    0.71
  -5  -3  -7    5.34    0.67
   5  -3   7    6.28    0.69
  -5  -3  -7    6.78    0.69
   5  -3   7    5.40    0.60
  -5  -3  -7    6.13    0.65
  -5  -3  -7    5.62    0.70
   5  -3   8    1.48    0.54
   5   3   8    2.31    0.59
  -5  -3  -8    1.81    0.46
  -5  -3  -8    1.60    0.42
   5  -3   8    1.44    0.37
  -5  -3  -8    1.36    0.30
   5  -3   8    1.51    0.39
   5  -3   8    1.80    0.36
  -5  -3  -8    1.67    0.37
  -5  -3  -8    1.83    0.45
   5  -3   9   10.44    0.82
   5  -3   9   12.26    1.32
  -5  -3  -9   11.03    1.02
   5   3   9    9.58    1.16
  -5  -3  -9    9.95    0.82
  -5   3  -9   11.55    0.81
  -5  -3  -9   11.38    1.05
   5  -3   9    9.21    0.87
  -5  -3  -9   11.25    0.84
  -5  -3  -9   10.48    0.95
   5  -3   9   13.27    1.04
  -5  -3 -10   12.77    1.07
  -5  -3 -10   14.32    1.13
   5  -3  10   10.17    0.91
  -5  -3 -10   10.32    0.95
   5  -3  10   14.32    0.89
  -5  -3 -10   10.82    0.86
   5  -3  10   10.91    0.92
  -5  -3 -11    0.86    0.25
  -5  -3 -11    0.54    0.36
   5  -3  11    0.81    0.29
   5  -3  11    0.92    0.24
   5  -3  11    0.45    0.27
   5  -3  11    0.77    0.27
  -5  -3 -11    0.87    0.34
  -5  -3 -11    0.94    0.33
  -5  -3 -12    6.73    0.68
  -5  -3 -12    5.19    0.58
   5  -3  12    7.07    0.60
   5  -3  12    7.19    0.52
   5  -3  12    5.09    0.58
  -5  -3 -12    6.40    0.67
  -5  -3 -12    5.52    0.55
   5  -3  12    6.18    0.57
   5  -3  13    0.20    0.15
  -5  -3 -13    0.19    0.23
  -5  -3 -13    0.27    0.22
   5  -3  13    0.17    0.17
   5  -3  13    0.02    0.13
   5  -3  13   -0.06    0.21
   5  -3  13   -0.10    0.18
  -5  -3 -13    0.14    0.19
   5  -3  14    0.14    0.14
  -5  -3 -14   -0.03    0.12
  -5   3 -14   -0.04    0.13
   5  -3  14    0.12    0.12
  -5  -3 -14    0.08    0.18
   5  -3  14    0.13    0.17
   5  -3  14   -0.05    0.15
   5  -3  15   10.00    0.59
   5   3  15    8.28    0.57
  -5  -4  14    0.40    0.15
  -5  -4  14    0.34    0.14
   5  -4 -14    0.45    0.14
   5  -4 -14    0.21    0.14
  -5  -4  13    9.38    0.66
  -5  -4  13    9.05    0.63
  -5  -4  13    9.16    0.55
   5  -4 -13    6.89    0.61
   5  -4 -13    9.27    0.71
  -5  -4  12    6.17    0.57
   5  -4 -12    5.43    0.48
   5  -4 -12    6.03    0.56
  -5  -4  12    7.21    0.49
  -5  -4  11   71.35    3.13
   5  -4 -11   59.32    3.23
  -5  -4  11   69.02    3.29
   5  -4 -11   62.60    3.23
   5  -4 -11   68.41    3.25
   5  -4 -10    0.40    0.27
   5  -4 -10    0.13    0.25
  -5  -4  10    0.39    0.23
   5  -4 -10    0.45    0.34
   5  -4 -10    0.55    0.21
  -5  -4  10    0.51    0.27
   5  -4 -10    0.49    0.29
   5  -4  -9   10.64    0.88
  -5  -4   9    8.73    0.73
   5  -4  -9    9.35    0.94
   5  -4  -9    8.95    0.78
   5  -4  -9   10.07    0.86
  -5  -4   9   10.26    0.88
   5  -4  -9    8.99    0.89
   5  -4  -8    0.50    0.30
   5  -4  -8    0.93    0.40
   5  -4  -8    0.59    0.22
   5  -4  -8    0.46    0.25
   5  -4  -8    0.42    0.19
   5  -4  -8    0.68    0.30
  -5  -4   8    0.68    0.25
  -5  -4   8    0.64    0.35
   5  -4  -8    0.35    0.29
  -5  -4   8    0.80    0.34
  -5  -4   8    0.07    0.25
   5  -4  -8    0.27    0.22
   5  -4  -8    0.31    0.19
   5  -4  -7    1.54    0.38
   5  -4  -7    2.69    0.38
   5  -4  -7    2.35    0.53
  -5  -4   7    2.42    0.36
  -5  -4   7    1.71    0.28
   5  -4  -7    1.37    0.35
   5  -4  -7    1.67    0.35
   5  -4  -7    1.40    0.42
  -5  -4   7    1.29    0.32
  -5  -4   7    2.27    0.46
  -5  -4   7    1.85    0.42
   5  -4  -7    0.88    0.42
  -5  -4   7    1.74    0.40
  -5  -4   7    1.54    0.32
   5  -4  -7    2.16    0.36
   5  -4  -7    1.47    0.35
   5  -4  -6   26.17    1.84
  -5  -4   6   32.54    1.70
  -5  -4   6   30.69    1.82
  -5  -4   6   30.00    1.58
  -5  -4   6   23.34    1.70
   5  -4  -6   26.55    1.96
   5  -4  -6   29.50    1.73
   5  -4  -6   27.43    1.77
   5  -4  -6   37.60    1.93
  -5  -4   6   26.67    1.65
   5  -4  -6   34.33    1.96
  -5  -4   6   36.35    1.73
  -5  -4   6   28.83    1.86
  -5  -4   6   35.10    1.96
  -5  -4   6   30.25    1.80
  -5  -4   6   22.23    1.65
   5  -4  -6   29.99    1.76
   5  -4  -6   29.61    1.80
   5  -4  -5    1.14    0.39
   5  -4  -5    1.31    0.35
  -5  -4   5    1.41    0.31
   5  -4  -5    1.41    0.44
   5  -4  -5    2.87    0.58
   5  -4  -5    2.06    0.41
  -5  -4   5    1.33    0.31
   5  -4  -5    1.69    0.45
  -5  -4   5    1.45    0.33
  -5  -4   5    1.09    0.36
  -5  -4   5    1.53    0.42
  -5  -4   5    1.72    0.39
  -5  -4   5    1.33    0.45
   5  -4  -5    1.77    0.38
   5  -4  -5    1.32    0.39
   5  -4  -5    0.98    0.34
  -5  -4   5    1.38    0.33
   5  -4  -4   49.12    2.99
  -5  -4   4   54.93    2.92
  -5  -4   4   58.89    2.77
   5  -4  -4   52.62    3.44
  -5  -4   4   45.61    2.82
   5  -4  -4   58.25    2.94
   5  -4  -4   49.49    3.09
   5  -4  -4   53.22    3.66
   5  -4  -4   56.12    3.03
  -5  -4   4   44.28    2.79
   5  -4  -4   50.55    3.08
  -5  -4   4   59.96    2.85
  -5  -4   4   56.29    2.97
  -5  -4   4   49.69    2.84
  -5  -4   4   60.51    3.10
   5  -4  -4   56.53    2.94
   5  -4  -4   53.16    3.00
   5  -4  -4   51.85    3.55
   5  -4  -3   12.53    1.12
  -5  -4   3   14.17    1.07
  -5  -4   3   14.53    0.92
  -5  -4   3   17.10    1.24
   5  -4  -3   11.35    1.12
  -5  -4   3   11.32    0.97
   5  -4  -3   12.87    1.12
   5  -4  -3   11.57    1.49
  -5  -4   3   11.71    1.00
   5  -4  -3   10.87    1.12
  -5  -4   3   15.02    1.08
  -5  -4   3   15.36    1.01
  -5  -4   3   12.84    1.14
  -5  -4   3   13.26    1.09
  -5  -4   3   14.01    1.05
   5  -4  -3   13.77    1.46
  -5  -4   3   13.56    1.10
   5  -4  -3   13.09    1.07
   5  -4  -3   13.30    1.06
   5  -4  -3   12.01    1.09
   5  -4  -3   12.72    1.51
   5  -4  -2    0.35    0.38
   5  -4  -2   -0.15    0.35
  -5  -4   2    0.39    0.20
  -5  -4   2    0.19    0.41
   5  -4  -2    0.39    0.34
  -5  -4   2    0.05    0.31
  -5  -4   2   -0.18    0.38
   5  -4  -2   -0.14    0.37
  -5  -4   2    0.30    0.27
  -5  -4   2    0.19    0.30
  -5  -4   2    0.18    0.25
  -5  -4   2    0.23    0.31
  -5  -4   2    0.04    0.27
   5  -4  -2   -0.40    0.36
  -5  -4   2    0.19    0.32
   5  -4  -2    0.31    0.37
   5  -4  -2    0.14    0.35
  -5  -4   2    0.04    0.28
   5   4  -1   20.29    1.93
  -5  -4   1   31.66    1.81
  -5  -4   1   27.92    1.58
   5  -4  -1   27.38    2.27
  -5  -4   1   28.40    1.85
  -5  -4   1   38.34    1.97
   5  -4  -1   29.01    1.90
  -5  -4   1   29.86    1.95
   5  -4  -1   28.76    1.83
  -5  -4   1   37.36    1.87
  -5  -4   1   27.81    1.77
  -5  -4   1   25.62    1.69
   5  -4  -1   26.28    1.90
  -5  -4   1   33.74    1.81
  -5  -4   1   33.11    1.76
  -5  -4   1   28.75    1.85
  -5  -4   1   28.42    1.79
  -5  -4   1   24.38    1.71
   5  -4  -1   29.73    1.86
   5  -4  -1   28.33    1.90
   5  -4   0    0.28    0.32
  -5  -4   0    0.91    0.46
  -5  -4   0    1.00    0.40
   5  -4   0    0.87    0.53
   5  -4   0    1.50    0.43
  -5  -4   0    1.37    0.45
  -5  -4   0    1.34    0.32
  -5  -4   0    0.58    0.36
  -5  -4   0    0.88    0.31
  -5  -4   0    0.88    0.33
   5  -4   0    0.86    0.41
  -5  -4   0    0.48    0.29
  -5  -4   0    0.40    0.37
  -5  -4   0    0.69    0.37
   5  -4   0    0.93    0.26
   5   4   0    0.82    0.38
   5  -4   0    0.67    0.38
   5  -4   0    0.98    0.54
   5   4   1   50.13    3.69
   5  -4   1   65.68    4.06
  -5  -4  -1   66.42    3.51
  -5  -4  -1   63.42    3.39
  -5  -4  -1   66.59    3.61
  -5  -4  -1   77.35    3.57
   5  -4   1   63.11    3.48
   5  -4   1   55.23    3.29
   5  -4   1   71.22    3.62
   5  -4   1   65.87    4.27
  -5  -4  -1   57.83    3.38
   5  -4   1   64.54    3.53
  -5  -4  -1   72.47    3.42
  -5  -4  -1   72.10    3.39
  -5  -4  -1   67.05    3.64
  -5  -4  -1   58.07    3.44
   5  -4   1   67.86    3.50
   5  -4   1   67.28    3.58
   5  -4   1   65.99    4.25
   5   4   2   57.57    4.02
   5  -4   2   60.94    3.61
   5  -4   2   70.00    4.32
   5  -4   2   78.58    3.80
  -5  -4  -2   78.01    3.81
  -5  -4  -2   71.88    3.92
   5  -4   2   71.12    3.74
   5  -4   2   70.73    3.84
   5  -4   2   69.94    4.51
  -5  -4  -2   67.19    3.72
  -5  -4  -2   72.64    3.78
   5  -4   2   70.05    3.79
  -5  -4  -2   81.46    3.70
  -5  -4  -2   79.62    3.69
  -5  -4  -2   68.15    3.77
  -5  -4  -2   72.77    3.93
   5  -4   2   76.88    3.80
   5  -4   2   71.79    3.85
   5  -4   2   59.96    4.34
   5   4   3   61.84    4.19
   5  -4   3   64.05    3.76
  -5  -4  -3   82.72    3.93
  -5  -4  -3   76.00    4.05
   5  -4   3   65.23    3.85
   5  -4   3   67.82    4.34
   5  -4   3   74.53    3.97
   5  -4   3   71.17    4.59
  -5  -4  -3   70.56    3.89
  -5  -4  -3   73.47    3.88
   5  -4   3   72.62    3.88
  -5  -4  -3   87.58    3.82
  -5  -4  -3   80.75    3.77
  -5  -4  -3   74.81    3.90
  -5  -4  -3   82.11    3.97
  -5  -4  -3   77.37    4.06
   5  -4   3   77.82    3.87
   5  -4   3   81.32    3.90
   5  -4   3   69.62    3.91
   5  -4   3   68.78    4.54
   5  -4   4    4.70    0.58
  -5  -4  -4    6.52    0.64
   5  -4   4    4.97    0.61
   5  -4   4    5.76    0.67
  -5  -4  -4    5.34    0.73
  -5  -4  -4    5.48    0.65
  -5  -4  -4    6.41    0.69
  -5  -4  -4    5.41    0.55
   5  -4   4    5.10    0.58
  -5  -4  -4    6.24    0.58
  -5  -4  -4    6.15    0.53
  -5  -4  -4    5.52    0.65
  -5  -4  -4    5.96    0.72
  -5  -4  -4    6.50    0.76
   5  -4   4    5.33    0.59
   5  -4   4    6.03    0.62
   5  -4   4    5.52    0.64
   5  -4   5    4.76    0.54
  -5  -4  -5    5.24    0.69
  -5  -4  -5    5.35    0.56
   5  -4   5    5.03    0.58
   5  -4   5    4.49    0.51
   5  -4   5    5.92    0.61
  -5  -4  -5    5.62    0.69
  -5  -4  -5    4.79    0.60
  -5  -4  -5    4.73    0.61
  -5  -4  -5    3.58    0.47
   5  -4   5    4.58    0.51
  -5  -4  -5    4.31    0.55
  -5  -4  -5    5.44    0.63
   5  -4   5    4.85    0.56
   5  -4   5    4.94    0.54
  -5  -4  -6    6.57    0.77
   5  -4   6    6.14    0.63
  -5  -4  -6    5.51    0.57
  -5  -4  -6    6.76    0.66
   5  -4   6    7.24    0.59
   5  -4   6    6.28    0.60
   5  -4   6    5.06    0.59
  -5  -4  -6    5.39    0.70
  -5  -4  -6    6.36    0.62
   5  -4   6    6.15    0.55
   5  -4   6    6.32    0.61
  -5  -4  -7    1.40    0.38
  -5  -4  -7    1.21    0.31
  -5  -4  -7    1.52    0.37
  -5  -4  -7    1.65    0.43
   5  -4   7    1.58    0.35
   5  -4   7    1.69    0.25
  -5  -4  -7    1.46    0.30
   5  -4   7    1.00    0.23
  -5  -4  -7    1.72    0.43
   5  -4   7    1.55    0.27
   5  -4   7    1.13    0.27
   5  -4   7    1.41    0.33
   5  -4   8    0.55    0.25
   5  -4   8    0.97    0.26
  -5  -4  -8    1.27    0.35
  -5  -4  -8    0.67    0.32
  -5  -4  -8    1.52    0.29
  -5  -4  -8    1.38    0.33
  -5  -4  -8    1.25    0.38
   5  -4   9    0.94    0.26
   5  -4   9    0.74    0.23
  -5  -4  -9    0.72    0.29
  -5  -4  -9    0.90    0.26
  -5  -4  -9    0.67    0.28
   5  -4   9    1.62    0.30
  -5  -4  -9    0.67    0.29
   5  -4  10    0.11    0.17
   5  -4  10    0.13    0.16
  -5  -4 -10    0.04    0.21
  -5  -4 -10   -0.03    0.17
  -5  -4 -10   -0.03    0.22
   5  -4  10    0.11    0.17
  -5  -4 -10   -0.03    0.17
   5  -4  11    0.05    0.14
   5  -4  11   -0.09    0.15
  -5  -4 -11    0.03    0.16
   5  -4  11   -0.02    0.14
  -5  -4 -11    0.08    0.15
  -5  -4 -11   -0.02    0.14
  -5  -4 -11   -0.15    0.20
   5  -4  12    0.03    0.09
   5  -4  12   -0.10    0.13
   5  -4  12    0.06    0.11
  -5  -4 -12   -0.06    0.10
  -5  -4 -12    0.07    0.12
  -5  -4 -12    0.15    0.13
   5  -4  13    2.96    0.22
   5  -5 -10    3.30    0.28
   5  -5  -9    7.04    0.48
  -5  -5   9    5.08    0.37
  -5  -5   9    6.73    0.45
   5  -5  -8    0.59    0.20
   5  -5  -8    0.49    0.16
  -5  -5   8    0.58    0.21
  -5  -5   8    0.72    0.16
   5  -5  -7    1.68    0.31
   5  -5  -7    2.17    0.31
  -5  -5   7    2.34    0.32
  -5  -5   7    2.23    0.27
   5  -5  -6    1.17    0.28
   5  -5  -6    1.43    0.29
  -5  -5   6    0.96    0.27
  -5  -5   6    0.84    0.20
   5  -5  -5   22.76    1.22
   5  -5  -5   21.16    1.33
   5  -5  -5   22.33    1.38
   5  -5  -5   22.61    1.27
   5  -5  -5   23.28    1.27
   5  -5  -4   12.23    0.83
   5  -5  -4   13.23    0.90
   5  -5  -4   11.61    0.89
   5  -5  -4   12.02    0.83
   5  -5  -4   12.41    0.91
   5  -5  -4   12.66    0.80
   5  -5  -3    1.24    0.27
   5  -5  -3    1.28    0.31
   5  -5  -3    1.30    0.30
   5  -5  -3    0.81    0.20
   5  -5  -3    1.45    0.30
  -5  -5   3    1.24    0.31
   5  -5  -3    1.28    0.24
   5  -5  -2    0.70    0.25
   5  -5  -2    0.37    0.19
   5  -5  -2    0.37    0.23
   5  -5  -2    0.40    0.21
  -5  -5   2    0.42    0.23
   5  -5  -1    3.70    0.43
   5  -5  -1    3.18    0.44
   5  -5  -1    3.59    0.41
  -5  -5   1    3.54    0.41
  -5  -5   1    3.55    0.47
  -5  -5   1    3.06    0.47
   5  -5  -1    3.29    0.38
   5  -5  -1    2.45    0.35
   5  -5   0    6.56    0.58
   5  -5   0    5.63    0.55
   5  -5   0    5.53    0.53
  -5  -5   0    5.51    0.54
   5  -5   0    5.89    0.55
  -5  -5   0    6.16    0.60
  -5  -5   0    6.72    0.65
   5  -5   0    4.52    0.48
   5  -5   1    4.41    0.44
  -5  -5  -1    4.97    0.50
   5  -5   1    3.83    0.45
   5  -5   1    3.94    0.45
   5  -5   1    4.91    0.43
  -5  -5  -1    4.43    0.54
  -5  -5  -1    4.71    0.52
   5  -5   1    4.95    0.50
   5  -5   1    3.84    0.43
   5  -5   2    0.98    0.23
  -5  -5  -2    0.92    0.30
  -5  -5  -2    1.19    0.31
   5  -5   2    1.03    0.24
   5  -5   2    0.92    0.25
  -5  -5  -2    1.11    0.32
   5  -5   2    1.13    0.28
   5  -5   2    0.81    0.24
  -5  -5  -2    1.20    0.25
  -5  -5  -3    3.39    0.39
  -5  -5  -3    3.49    0.43
   5  -5   3    3.61    0.35
   5  -5   3    3.40    0.38
   5  -5   3    3.57    0.36
   5  -5   3    3.69    0.40
  -5  -5  -3    3.54    0.47
  -5  -5  -3    3.54    0.48
   5  -5   3    3.33    0.38
   5  -5   4    2.95    0.30
   5  -5   4    3.53    0.34
   5  -5   4    2.72    0.29
  -5  -5  -4    3.64    0.37
   5  -5   4    3.12    0.34
  -5  -5  -4    3.44    0.44
  -5  -5  -4    2.43    0.39
  -5  -5  -5    4.42    0.43
   5  -5   5    4.77    0.36
  -5  -5  -5    4.06    0.46
   5  -5   5    5.36    0.39
  -5  -5  -5    4.43    0.49
  -5  -5  -6    0.18    0.17
   5  -5   6    0.15    0.11
  -5  -5  -6    0.45    0.20
  -5  -5  -6    0.23    0.18
   5  -5   6    0.22    0.15
   5  -5   7    0.63    0.13
  -5  -5  -7    0.70    0.17
   5  -5   7    1.21    0.17
  -5  -5  -7    0.72    0.18
   5  -5   8    0.41    0.11
   5  -5   8    0.26    0.08
   6   0 -19    0.09    0.14
   6   0 -18    4.07    0.48
  -6   0  18    3.15    0.32
  -6   0  18    3.71    0.36
  -6   0  17    0.06    0.15
   6   0 -17    0.03    0.20
   6   0 -17   -0.10    0.26
  -6   0  17    0.13    0.17
  -6   0  17   -0.03    0.17
   6   0 -16   77.86    4.19
  -6   0  16   83.35    4.01
   6   0 -16   77.22    4.02
  -6   0  16   78.50    3.95
  -6   0  16   78.92    3.97
  -6   0  15   -0.09    0.23
  -6   0  15    0.12    0.23
   6   0 -15   -0.13    0.37
   6   0 -15   -0.05    0.25
  -6   0  15    0.08    0.21
   6   0 -15    0.81    0.32
  -6   0  14    0.38    0.24
  -6   0  14    1.02    0.33
   6   0 -14    0.56    0.30
   6   0 -14   -0.13    0.47
  -6   0  13    0.55    0.27
  -6   0  13    0.35    0.26
   6   0 -13    0.15    0.24
   6   0 -13    0.13    0.36
  -6   0  12    3.53    0.45
  -6   0  12    2.66    0.40
   6   0 -12    2.99    0.45
   6   0 -12    2.38    0.63
  -6   0  11    0.12    0.19
  -6   0  11    0.28    0.18
   6   0 -11    0.11    0.34
   6   0 -11   -0.09    0.24
  -6   0  10  192.41    9.05
  -6   0  10  188.63    9.04
   6   0 -10  195.39    9.68
   6   0  -9    0.09    0.27
  -6   0   8    8.32    0.70
   6   0  -8    9.05    0.99
   6   0  -8    7.00    0.86
   6   0  -7    0.08    0.28
  -6   0   7    0.12    0.18
  -6   0   7    0.05    0.11
   6   0  -7   -0.07    0.28
   6   0  -6  442.15   21.38
  -6   0   6  462.94   21.06
  -6   0   6  462.85   20.83
   6   0  -6  438.06   21.28
   6   0  -5   -0.06    0.28
  -6   0   5    0.15    0.11
  -6   0   5    0.15    0.19
   6   0  -4  282.53   14.15
  -6   0   4  315.16   14.02
   6   0  -3    0.10    0.20
  -6   0   3   -0.04    0.18
   6   0  -2   16.99    1.21
   6   0  -1    0.19    0.21
  -6   0   1   -0.05    0.24
  -6   0   0   16.15    1.01
  -6   0   0   19.48    1.31
  -6   0  -1   -0.11    0.24
  -6   0  -1   -0.04    0.19
  -6   0  -1    0.05    0.12
  -6   0  -2    5.66    0.55
  -6   0  -2    5.68    0.48
  -6   0  -2    4.63    0.64
  -6   0  -3   -0.13    0.30
  -6   0  -3   -0.08    0.18
  -6   0  -3    0.14    0.15
  -6   0  -3   -0.04    0.11
   6   0   4    2.00    0.35
  -6   0  -4    2.58    0.33
  -6   0  -4    1.78    0.43
  -6   0  -4    2.20    0.35
  -6   0  -4    2.08    0.24
   6   0   5   -0.04    0.19
  -6   0  -5    0.03    0.17
  -6   0  -5   -0.12    0.19
  -6   0  -5    0.11    0.10
   6   0   6   83.74    4.28
  -6   0  -6   85.36    4.22
  -6   0  -6   89.90    4.74
  -6   0  -6   85.23    4.25
  -6   0  -6   82.70    4.01
  -6   0  -7    0.10    0.32
  -6   0  -7    0.34    0.20
  -6   0  -7   -0.17    0.22
   6   0   7    0.19    0.22
   6   0   8  450.26   20.59
   6   0   8  432.81   20.50
  -6   0  -8  419.87   21.20
  -6   0  -8  458.53   20.56
  -6   0  -9    0.05    0.29
   6   0   9   -0.05    0.20
   6   0   9   -0.24    0.22
   6   0   9    0.20    0.20
  -6   0  -9   -0.36    0.47
  -6   0  -9    0.06    0.18
   6   0  10   34.39    2.06
   6   0  10   33.10    1.99
   6   0  10   33.35    1.94
  -6   0 -10   30.24    2.52
  -6   0 -10   32.06    2.05
  -6   0 -11   -0.10    0.28
   6   0  11   -0.16    0.27
  -6   0 -11   -0.28    0.33
  -6   0 -11   -0.06    0.23
   6   0  11    0.42    0.21
  -6   0 -12   12.71    1.05
   6   0  12   13.15    1.09
  -6   0 -12   14.09    1.57
  -6   0 -12   14.46    1.17
   6   0  13    0.05    0.27
  -6   0 -13    0.28    0.40
  -6   0 -13    0.25    0.32
  -6   0 -13    0.16    0.31
  -6   0 -13   -0.06    0.27
  -6   0 -14   -0.19    0.32
  -6   0 -14    0.10    0.28
  -6   0 -14    0.33    0.28
   6   0  14    0.33    0.28
  -6   0 -15    0.04    0.27
  -6   0 -15    0.22    0.29
  -6   0 -15    0.10    0.25
   6   0  15   -0.04    0.26
  -6   0 -16    1.41    0.35
  -6   0 -16    1.80    0.36
  -6   0 -16    1.79    0.34
   6   0  16    2.10    0.36
   6   0  17    0.05    0.17
  -6   0 -17    0.22    0.19
  -6   0 -17    0.14    0.20
  -6   0 -17   -0.03    0.19
   6   0  18    1.79    0.22
  -6   0 -18    1.46    0.22
  -6   0 -18    1.21    0.20
  -6   1  19    2.53    0.26
  -6  -1  19    1.97    0.24
   6  -1 -19    1.86    0.27
  -6  -1  19    2.52    0.28
  -6   1  19    2.39    0.24
   6  -1 -18    0.23    0.21
   6  -1 -18    0.33    0.21
  -6   1  18    0.30    0.17
  -6   1  18    0.15    0.15
   6   1 -18    0.21    0.17
   6  -1 -18    0.21    0.18
   6  -1 -18    0.27    0.20
  -6  -1  18    0.10    0.12
  -6  -1  18    0.32    0.19
  -6  -1  17   25.72    1.46
   6   1 -17   22.73    1.50
   6  -1 -17   23.53    1.50
  -6   1  17   23.91    1.41
   6  -1 -17   22.64    1.47
  -6   1  17   25.46    1.44
  -6  -1  17   23.53    1.34
   6  -1 -17   22.39    1.51
   6  -1 -16   31.30    1.86
  -6  -1  16   32.08    1.81
   6   1 -16   28.64    1.84
   6  -1 -16   30.23    1.87
  -6  -1  16   27.80    1.69
  -6   1  16   30.63    1.76
  -6   1  15    0.59    0.29
   6  -1 -15    0.59    0.32
   6  -1 -15    0.56    0.33
  -6  -1  15    0.58    0.29
  -6  -1  15    0.80    0.25
  -6  -1  15    1.04    0.26
   6  -1 -14    1.59    0.45
   6   1 -14    2.27    0.57
   6  -1 -14    3.51    0.77
   6  -1 -14    1.66    0.69
  -6  -1  14    1.75    0.35
  -6  -1  14    1.52    0.32
  -6  -1  14    1.80    0.33
  -6   1  14    2.28    0.43
   6   1 -13   33.53    2.50
   6  -1 -13   31.48    2.52
  -6  -1  13   30.04    1.85
   6  -1 -13   33.49    2.71
  -6  -1  13   32.82    1.92
  -6   1  13   35.18    2.00
   6  -1 -13   37.35    2.14
  -6   1  13   37.14    2.01
  -6  -1  13   30.16    1.84
   6  -1 -12    8.26    0.83
  -6  -1  12    7.72    0.67
  -6   1  12    8.92    0.78
   6  -1 -12    8.95    1.14
   6   1 -12    7.64    1.03
  -6  -1  12    7.47    0.68
  -6   1  12    8.43    0.94
   6  -1 -12    8.46    1.21
  -6  -1  12    7.43    0.70
   6  -1 -12   10.41    1.22
  -6   1  12    9.57    0.80
  -6  -1  11   21.10    1.33
   6  -1 -11   25.03    2.11
  -6   1  11   20.98    1.63
  -6  -1  11   20.05    1.32
   6  -1 -11   22.69    1.91
   6  -1 -11   23.87    1.92
   6   1 -11   20.37    1.80
  -6   1  11   21.78    1.40
   6  -1 -11   21.79    1.49
  -6  -1  11   21.19    1.31
  -6  -1  10    1.10    0.21
  -6   1  10    1.67    0.42
   6  -1 -10    3.06    0.69
  -6  -1  10    0.95    0.26
  -6  -1  10    1.04    0.26
   6  -1 -10    2.17    0.42
   6   1 -10    1.95    0.51
   6  -1 -10    0.73    0.38
  -6  -1  10    1.35    0.26
  -6   1  10    1.34    0.31
  -6  -1   9   32.73    2.18
   6  -1  -9   41.84    2.82
   6   1  -9   35.81    2.36
  -6   1   9   37.71    2.32
   6   1  -9   38.57    2.51
   6  -1  -9   40.75    2.61
   6  -1  -9   39.50    2.21
  -6   1   9   39.71    2.11
  -6   1   8    3.00    0.48
   6   1  -8    3.44    0.51
   6  -1  -8    3.41    0.69
  -6  -1   8    3.50    0.47
  -6  -1   8    2.97    0.48
   6   1  -8    4.01    0.63
   6  -1  -8    3.73    0.65
  -6  -1   8    3.52    0.54
  -6  -1   7    0.16    0.14
  -6   1   7    0.35    0.21
   6   1  -7    0.26    0.20
   6  -1  -7    0.29    0.38
  -6  -1   7    0.23    0.20
  -6  -1   7   -0.06    0.25
   6   1  -7   -0.07    0.24
   6  -1  -7    0.15    0.30
   6  -1  -7    0.19    0.20
  -6  -1   7    0.24    0.25
  -6  -1   6    6.20    0.53
   6   1  -6    7.60    0.67
   6  -1  -6    7.18    0.92
  -6  -1   6    6.29    0.64
  -6  -1   6    6.79    0.74
   6   1  -6    7.23    0.79
   6  -1  -6    6.88    0.76
   6  -1  -6    7.44    0.57
  -6  -1   6    6.76    0.72
  -6  -1   5  374.98   17.34
   6   1  -5  358.69   17.47
   6  -1  -5  417.99   18.02
  -6  -1   5  380.59   17.54
   6  -1  -5  411.89   17.74
   6  -1  -5  369.43   17.35
  -6  -1   5  373.04   17.66
   6  -1  -4  256.82   11.19
  -6  -1   4  228.04   10.84
  -6  -1   4  222.62   11.13
   6  -1  -4  254.51   11.47
   6   1  -4  230.25   10.94
  -6  -1   3   90.99    4.66
   6  -1  -3  103.59    4.88
  -6  -1   3   99.77    4.98
   6  -1  -3  108.36    5.24
   6   1  -3   99.34    4.74
  -6  -1   2   63.31    3.21
  -6  -1   2   69.89    3.52
   6  -1  -2   66.08    3.32
   6  -1  -2   68.40    3.69
   6  -1  -1   24.67    1.36
  -6  -1   1   26.20    1.62
   6  -1  -1   26.90    1.77
  -6  -1   1   24.52    1.36
   6  -1  -1   24.57    1.37
  -6  -1   1   25.51    1.63
   6  -1   0  604.71   28.09
  -6  -1   0  608.20   27.95
  -6   1   0  597.51   27.98
   6  -1   0  607.12   27.60
  -6  -1  -1   15.14    1.08
  -6  -1  -1   14.84    1.13
  -6   1  -1   12.83    1.07
  -6  -1  -1   12.12    0.80
   6  -1   1   13.25    0.84
  -6   1  -1   12.18    0.81
  -6  -1  -1   13.91    0.86
  -6  -1  -2  185.22    8.70
  -6  -1  -2  188.26    8.79
  -6   1  -2  188.03    8.79
  -6  -1  -2  165.84    8.36
   6  -1   2  190.34    8.42
  -6  -1  -2  177.78    8.43
  -6   1  -2  179.82    8.41
   6  -1   3   17.71    1.07
  -6  -1  -3   20.03    1.33
  -6  -1  -3   17.13    1.10
  -6   1  -3   15.90    1.06
  -6  -1  -3   17.66    1.38
  -6  -1  -3   17.23    1.04
   6  -1   3   17.19    1.08
  -6  -1  -4   37.02    2.21
   6  -1   4   35.78    1.93
  -6  -1  -4   36.55    1.99
  -6   1  -4   35.77    1.96
  -6  -1  -4   40.66    2.23
  -6   1  -4   37.67    2.30
  -6  -1  -4   40.91    2.39
  -6  -1  -4   34.46    1.90
   6  -1   5   38.22    2.06
  -6  -1  -5   38.48    2.34
   6   1   5   37.51    2.40
  -6  -1  -5   42.47    2.18
  -6   1  -5   37.82    2.11
  -6  -1  -5   44.50    2.39
  -6   1  -5   41.19    2.49
  -6  -1  -5   42.96    2.61
  -6  -1  -5   38.30    2.06
  -6  -1  -6    9.99    0.90
   6  -1   6    8.41    0.64
   6   1   6    9.60    0.96
  -6  -1  -6    9.57    0.77
  -6   1  -6   10.02    0.75
  -6  -1  -6    8.87    0.84
  -6   1  -6   10.17    1.04
  -6  -1  -6    8.63    1.03
  -6  -1  -6    8.09    0.63
   6   1   7   13.51    1.17
   6  -1   7   14.99    1.02
   6  -1   7   13.76    1.01
  -6  -1  -7   13.15    0.97
  -6   1  -7   14.40    0.98
  -6  -1  -7   10.45    0.85
  -6  -1  -7   13.99    1.37
   6  -1   7   13.33    1.07
  -6   1  -7   14.04    1.30
  -6  -1  -7   13.14    0.91
  -6  -1  -7   11.10    1.02
  -6   1  -7   15.02    0.99
   6   1   8    7.60    0.91
  -6  -1  -8    6.74    0.66
  -6  -1  -8    8.21    0.71
  -6  -1  -8    9.64    0.80
  -6   1  -8    9.70    0.78
   6  -1   8    9.86    0.80
   6  -1   8    6.95    0.75
   6   1   8    7.33    0.73
  -6  -1  -8   11.87    1.22
  -6   1  -8    8.79    1.03
   6   1   9   38.14    2.48
  -6  -1  -9   35.89    2.14
  -6  -1  -9   38.64    2.21
  -6   1  -9   41.28    2.20
  -6  -1  -9   38.28    2.27
  -6   1  -9   36.13    2.22
   6  -1   9   41.38    2.29
   6  -1   9   40.55    2.28
   6   1   9   38.52    2.25
  -6  -1  -9   40.03    2.88
  -6   1  -9   42.01    2.76
   6   1  10    1.67    0.47
   6  -1  10    0.90    0.33
   6   1  10    0.82    0.31
  -6  -1 -10    1.06    0.31
  -6  -1 -10    1.03    0.33
  -6   1 -10    1.28    0.32
  -6  -1 -10    1.69    0.35
  -6  -1 -10    1.14    0.36
  -6   1 -10    1.34    0.36
   6  -1  10    0.98    0.34
  -6  -1 -10    0.92    0.46
  -6   1 -10    1.02    0.49
   6   1  11   94.03    5.15
  -6  -1 -11   88.86    4.74
   6   1  11   91.95    4.84
   6  -1  11  100.21    4.88
   6  -1  11  102.47    4.92
  -6  -1 -11   96.96    4.93
  -6   1 -11   96.14    4.89
  -6  -1 -11   92.55    5.65
  -6   1 -11   83.32    5.38
  -6  -1 -11   94.48    4.84
  -6  -1 -11   96.20    4.84
  -6   1 -11  104.50    4.86
   6   1  12    0.16    0.26
   6   1  12   -0.05    0.25
   6  -1  12    0.25    0.28
  -6   1 -12    0.46    0.29
  -6  -1 -12    0.34    0.26
  -6  -1 -12   -0.05    0.29
   6  -1  12    0.25    0.27
  -6  -1 -12    0.34    0.32
  -6   1 -12    0.38    0.31
  -6  -1 -12   -0.14    0.38
  -6   1 -12   -0.12    0.31
  -6  -1 -13    1.26    0.37
  -6   1 -13    1.78    0.39
   6   1  13    1.89    0.40
   6  -1  13    1.40    0.38
  -6   1 -13    1.63    0.39
  -6  -1 -13    2.20    0.41
  -6  -1 -13    1.23    0.41
   6  -1  13    0.99    0.24
   6  -1  14   15.28    1.11
   6   1  14   14.59    1.07
  -6  -1 -14   14.95    1.11
  -6   1 -14   15.85    1.11
  -6  -1 -14   15.41    1.15
  -6   1 -14   14.19    1.11
   6  -1  15   29.33    1.75
   6   1  15   32.22    1.75
  -6  -1 -15   26.93    1.78
  -6   1 -15   28.52    1.77
  -6  -1 -15   29.23    1.76
  -6   1 -15   32.33    1.78
  -6   1 -15   34.40    1.87
  -6  -1 -16    0.61    0.23
  -6   1 -16    0.61    0.29
  -6   1 -16    0.69    0.25
   6   1  16    0.46    0.22
   6  -1  16    0.76    0.24
   6  -1  16    0.82    0.24
  -6   1 -16    0.52    0.21
  -6  -1 -16    0.81    0.24
  -6  -1 -17    2.22    0.29
  -6   1 -17    2.67    0.34
  -6   1 -17    2.43    0.28
   6   1  17    2.65    0.29
   6  -1  17    1.66    0.27
   6   1  17    2.42    0.28
  -6  -1 -17    2.68    0.33
   6  -1  17    2.17    0.29
  -6   1 -18    0.13    0.11
  -6  -1 -18    0.20    0.12
   6  -1  18    0.24    0.09
  -6   2  19    7.63    0.44
  -6  -2  19    7.54    0.45
   6  -2 -18    2.00    0.27
  -6  -2  18    1.81    0.23
  -6  -2  18    2.23    0.27
  -6   2  18    2.02    0.23
  -6   2  18    1.98    0.25
  -6  -2  18    1.32    0.18
   6  -2 -18    1.32    0.20
  -6   2  17    2.86    0.34
   6  -2 -17    2.41    0.37
   6  -2 -17    2.42    0.38
  -6  -2  17    2.83    0.36
  -6   2  17    2.28    0.31
  -6  -2  17    2.24    0.29
  -6  -2  17    2.08    0.25
   6  -2 -17    2.37    0.33
   6  -2 -16   14.60    0.98
  -6   2  16   13.65    0.88
   6  -2 -16   10.49    0.88
   6  -2 -16   13.13    1.03
  -6  -2  16   10.62    0.78
  -6   2  16   13.66    0.90
  -6  -2  16   11.34    0.83
  -6  -2  16   11.87    0.88
   6  -2 -15    2.43    0.41
  -6   2  15    1.79    0.35
   6  -2 -15    1.30    0.37
   6   2 -15    1.70    0.31
   6  -2 -15    1.79    0.33
  -6   2  15    1.22    0.31
  -6  -2  15    2.81    0.42
   6  -2 -15    1.77    0.47
  -6  -2  15    1.74    0.33
  -6  -2  15    2.09    0.33
  -6   2  14    0.66    0.28
   6  -2 -14    0.72    0.35
   6   2 -14    0.19    0.24
   6  -2 -14    0.22    0.21
  -6  -2  14    0.33    0.17
  -6   2  14    0.34    0.23
   6  -2 -14    0.16    0.27
   6  -2 -14    0.43    0.40
  -6  -2  14    0.48    0.25
  -6  -2  14    0.20    0.20
  -6  -2  13   50.91    2.87
  -6   2  13   59.32    2.93
   6  -2 -13   53.69    3.01
  -6   2  13   57.75    2.90
  -6  -2  13   48.85    2.79
   6  -2 -13   46.43    2.92
   6  -2 -13   55.76    2.93
  -6  -2  13   55.60    2.88
  -6  -2  13   53.80    2.70
   6  -2 -13   50.60    3.53
  -6   2  12   85.32    3.98
   6  -2 -12   81.10    4.08
  -6   2  12   81.89    3.94
  -6  -2  12   74.74    3.93
   6  -2 -12   75.75    4.66
  -6   2  12   67.13    4.12
   6  -2 -12   77.88    4.53
   6  -2 -12   68.78    3.97
  -6  -2  12   72.85    3.89
  -6  -2  12   73.75    3.73
  -6  -2  11    2.21    0.35
   6  -2 -11    2.60    0.44
  -6   2  11    3.00    0.47
   6  -2 -11    2.16    0.48
  -6  -2  11    2.26    0.44
  -6  -2  11    2.76    0.45
   6  -2 -11    3.20    0.68
   6  -2 -11    2.13    0.65
  -6   2  11    2.21    0.47
  -6   2  11    2.33    0.43
   6  -2 -10  142.92    7.54
   6  -2 -10  152.40    8.04
   6   2 -10  149.41    7.92
  -6   2  10  165.81    7.54
   6  -2 -10  149.73    7.63
  -6   2  10  172.77    7.52
  -6  -2  10  159.19    7.53
  -6  -2  10  150.53    7.50
  -6  -2  10  156.17    7.36
  -6  -2  10  146.64    7.83
  -6  -2  10  151.36    7.55
   6  -2 -10  151.12    8.19
  -6   2  10  158.00    7.75
  -6  -2   9    6.76    0.66
  -6  -2   9    6.49    0.59
  -6  -2   9    6.75    0.78
  -6  -2   9    6.23    0.82
  -6  -2   9    7.63    0.72
   6  -2  -9    7.72    0.71
  -6   2   9    7.46    0.68
   6  -2  -9    7.43    0.79
  -6   2   9    6.98    0.64
  -6  -2   9    6.34    0.66
   6  -2  -9    7.42    0.94
   6  -2  -9    5.78    0.92
   6   2  -9    7.31    0.91
  -6   2   9    7.43    0.78
   6  -2  -8    0.39    0.20
  -6  -2   8    0.25    0.31
   6   2  -8    0.08    0.26
   6  -2  -8    0.09    0.30
   6  -2  -8    0.41    0.37
  -6   2   8    0.23    0.20
  -6  -2   8   -0.08    0.28
   6  -2  -8    0.09    0.26
  -6  -2   8    0.20    0.23
   6  -2  -8    0.48    0.34
   6  -2  -8    0.17    0.21
  -6  -2   8    0.15    0.18
  -6  -2   8    0.48    0.34
  -6  -2   8    0.63    0.25
   6  -2  -8    0.09    0.23
  -6   2   8    0.17    0.20
   6  -2  -8    0.54    0.32
  -6  -2   8    0.48    0.25
  -6  -2   8   -0.09    0.27
  -6   2   8    0.34    0.21
   6  -2  -8    0.41    0.24
  -6  -2   7  131.27    7.19
   6  -2  -7  138.04    7.27
   6  -2  -7  144.29    6.74
   6  -2  -7  146.76    7.15
   6   2  -7  137.43    7.09
  -6   2   7  137.09    6.84
  -6  -2   7  135.42    6.75
  -6  -2   7  143.24    7.15
   6  -2  -7  144.16    7.31
   6  -2  -7  134.02    6.76
   6  -2  -7  142.65    7.20
  -6  -2   7  131.16    6.71
  -6  -2   7  138.74    7.16
  -6  -2   7  132.34    6.74
  -6  -2   7  145.40    6.67
  -6  -2   7  146.96    6.63
  -6  -2   7  139.25    6.78
   6  -2  -7  138.64    6.78
   6  -2  -7  147.18    7.34
  -6   2   7  144.58    6.76
  -6   2   7  148.73    6.73
   6  -2  -7  139.82    6.89
  -6  -2   7  133.88    6.75
  -6  -2   7  127.06    6.71
   6  -2  -7  158.98    6.87
  -6  -2   6   54.55    3.02
  -6  -2   6   59.21    3.37
   6  -2  -6   61.00    3.47
  -6  -2   6   56.90    3.40
  -6  -2   6   60.73    2.94
  -6  -2   6   54.93    3.01
  -6  -2   6   55.17    3.02
   6  -2  -6   66.78    3.65
  -6   2   6   60.77    3.02
   6  -2  -6   57.91    3.13
  -6  -2   6   52.86    3.00
   6  -2  -6   62.67    3.04
   6  -2  -6   62.35    3.49
  -6  -2   6   52.86    3.42
   6   2  -6   53.12    3.24
   6  -2  -6   62.44    3.33
   6  -2  -5    3.25    0.64
   6   2  -5    1.96    0.41
   6  -2  -5    2.97    0.47
   6  -2  -5    3.66    0.57
   6  -2  -5    1.72    0.57
   6  -2  -5    2.92    0.45
  -6  -2   5    2.84    0.53
  -6  -2   5    2.00    0.50
   6  -2  -5    2.97    0.41
  -6  -2   5    2.18    0.53
  -6  -2   5    2.75    0.32
  -6  -2   5    1.55    0.34
   6  -2  -5    2.82    0.59
  -6  -2   4    0.43    0.34
   6  -2  -4    1.48    0.33
   6  -2  -4    0.71    0.45
  -6  -2   4    0.72    0.41
   6  -2  -4    0.72    0.27
   6  -2  -4    0.68    0.29
  -6  -2   4    0.56    0.25
   6  -2  -4    1.19    0.48
  -6  -2   3   14.59    1.32
   6  -2  -3   16.46    1.22
   6  -2  -3   16.53    1.05
   6  -2  -3   14.10    1.40
  -6  -2   3   16.57    1.35
   6  -2  -3   13.97    1.04
  -6  -2   3   13.62    1.01
   6  -2  -3   13.32    1.32
  -6  -2   2  117.56    6.21
   6  -2  -2  126.13    5.79
   6  -2  -2  138.98    6.49
   6  -2  -2  121.71    5.91
   6  -2  -2  111.52    5.75
  -6  -2   2  108.75    5.75
   6  -2  -2  125.38    6.28
  -6  -2   1    8.74    0.96
   6  -2  -1    8.19    0.70
   6  -2  -1    9.26    1.04
  -6  -2   1    8.76    0.72
   6  -2  -1    7.01    0.62
   6  -2  -1    9.27    1.02
  -6  -2   1    9.75    0.98
   6  -2   0   66.34    3.20
  -6  -2   0   58.04    3.53
  -6  -2   0   61.89    3.36
   6  -2   0   60.37    3.18
   6  -2   1    5.79    0.60
   6  -2   1    5.36    0.54
  -6  -2  -1    5.40    0.56
  -6  -2  -1    5.86    0.81
   6  -2   1    5.70    0.58
  -6  -2  -1    4.84    0.62
   6  -2   1    6.44    0.90
  -6  -2  -1    5.19    0.76
   6  -2   2  162.52    7.96
  -6  -2  -2  164.02    8.19
  -6  -2  -2  156.25    7.76
   6  -2   2  162.08    7.77
  -6  -2  -2  166.31    8.04
   6  -2   2  168.74    8.30
  -6  -2  -2  163.96    8.23
   6  -2   2  165.83    7.78
  -6  -2  -3  410.95   18.65
  -6  -2  -3  393.52   19.13
   6  -2   3  409.98   18.72
  -6  -2  -3  407.57   18.74
  -6  -2  -3  404.57   19.03
   6  -2   3  424.46   19.27
  -6   2  -3  379.77   18.91
  -6  -2  -3  386.63   19.18
   6  -2   3  414.85   18.73
   6  -2   4  363.79   16.32
  -6  -2  -4  338.79   15.60
  -6  -2  -4  328.96   16.10
   6  -2   4  340.82   15.58
   6  -2   4  350.53   15.72
  -6  -2  -4  338.90   15.53
  -6  -2  -4  322.79   15.59
   6  -2   4  337.14   15.61
   6  -2   4  355.66   16.14
  -6  -2  -4  327.76   15.94
  -6   2  -4  302.78   15.79
  -6  -2  -4  334.06   16.03
  -6  -2  -5   51.43    3.03
   6  -2   5   48.86    2.56
  -6  -2  -5   52.12    2.58
  -6  -2  -5   50.56    2.62
   6  -2   5   46.83    2.60
  -6  -2  -5   48.80    2.98
   6  -2   5   45.47    2.96
  -6   2  -5   40.96    2.74
  -6  -2  -5   46.74    2.55
  -6  -2  -5   53.18    3.00
   6  -2   5   40.51    2.51
   6  -2   5   45.87    2.61
   6  -2   5   52.11    3.15
  -6  -2  -5   47.31    2.60
   6  -2   5   45.38    2.61
   6  -2   5   50.66    3.10
  -6  -2  -5   52.05    2.60
  -6  -2  -5   48.01    2.58
   6  -2   5   49.90    2.70
  -6  -2  -5   54.33    2.64
   6  -2   6   21.03    1.72
  -6  -2  -6   20.84    1.69
   6  -2   6   23.61    1.33
  -6  -2  -6   20.76    1.33
   6   2   6   21.85    1.75
  -6  -2  -6   23.74    1.69
   6  -2   6   23.20    1.33
  -6  -2  -6   24.31    1.39
   6  -2   6   22.17    1.39
  -6  -2  -6   20.56    1.70
   6  -2   6   23.22    1.70
  -6   2  -6   18.77    1.51
   6  -2   6   17.51    1.26
  -6  -2  -6   20.56    1.39
   6  -2   6   22.04    1.77
  -6  -2  -6   19.39    1.35
  -6  -2  -6   20.58    1.28
  -6  -2  -6   21.68    1.33
   6  -2   6   22.79    1.49
   6  -2   6   20.24    1.31
  -6  -2  -6   20.72    1.34
  -6  -2  -7   36.95    2.05
   6   2   7   39.14    2.55
   6  -2   7   34.35    2.27
  -6  -2  -7   33.95    2.48
   6  -2   7   31.91    1.93
  -6  -2  -7   38.55    2.03
   6  -2   7   35.41    1.95
   6  -2   7   32.23    2.04
  -6  -2  -7   32.93    2.09
   6  -2   7   36.30    2.42
  -6   2  -7   38.98    1.87
  -6  -2  -7   35.52    2.08
  -6  -2  -7   40.46    2.04
   6  -2   7   34.57    2.01
  -6  -2  -7   36.66    2.01
  -6  -2  -7   30.49    2.29
   6  -2   7   36.66    1.95
  -6  -2  -8    4.76    0.79
  -6  -2  -8    5.61    0.61
  -6  -2  -8    5.43    0.58
   6  -2   8    4.31    0.52
   6   2   8    4.17    0.73
  -6  -2  -8    4.69    0.60
   6  -2   8    4.40    0.47
  -6  -2  -8    4.97    0.56
  -6   2  -8    3.87    0.45
   6  -2   8    5.14    0.59
  -6  -2  -9    1.01    0.42
  -6  -2  -9   -0.05    0.24
  -6  -2  -9    0.10    0.30
  -6  -2  -9   -0.13    0.25
   6  -2   9   -0.06    0.25
  -6  -2  -9   -0.05    0.20
  -6   2  -9    0.29    0.19
   6  -2   9    0.05    0.24
   6  -2   9   -0.04    0.24
   6   2   9   -0.34    0.25
   6   2   9   -0.09    0.32
   6  -2   9   -0.03    0.18
   6  -2  10    5.04    0.63
   6   2  10    7.63    0.97
  -6   2 -10    7.94    0.69
   6  -2  10    6.33    0.73
   6  -2  10    6.08    0.63
   6   2  10    5.93    0.62
  -6  -2 -10    7.26    0.74
  -6  -2 -10    8.20    0.73
  -6  -2 -10    6.52    0.99
  -6  -2 -10    6.51    0.72
  -6  -2 -10    7.65    0.70
  -6   2 -10    6.36    0.61
   6  -2  11   15.75    1.18
   6   2  11   13.90    1.42
  -6   2 -11   18.45    1.17
  -6  -2 -11   15.38    1.09
   6  -2  11   18.28    1.29
   6  -2  11   16.59    1.15
   6   2  11   16.15    1.10
  -6  -2 -11   16.48    1.23
  -6  -2 -11   16.04    1.18
  -6   2 -11   15.23    1.08
  -6  -2 -11   14.71    1.57
  -6  -2 -11   16.06    1.19
  -6  -2 -11   18.19    1.22
  -6  -2 -12   22.26    1.56
  -6  -2 -12   25.72    1.55
  -6  -2 -12   28.98    1.65
  -6  -2 -12   24.09    1.50
  -6   2 -12   29.78    1.58
   6  -2  12   24.15    1.59
   6  -2  12   25.26    1.53
   6   2  12   23.28    1.46
   6  -2  12   23.14    1.46
  -6  -2 -12   25.65    1.59
  -6  -2 -12   24.35    1.58
   6  -2  13    1.62    0.28
   6  -2  13    2.44    0.34
  -6  -2 -13    2.51    0.38
   6  -2  13    1.91    0.37
  -6  -2 -13    1.36    0.33
  -6   2 -13    2.35    0.37
  -6  -2 -13    1.84    0.39
   6  -2  13    2.22    0.35
   6   2  13    2.30    0.32
  -6  -2 -14    0.14    0.27
  -6  -2 -14    0.20    0.17
   6  -2  14    0.23    0.22
  -6   2 -14    0.12    0.18
  -6  -2 -14    0.26    0.21
  -6  -2 -14    0.25    0.18
   6  -2  14    0.03    0.16
   6   2  14    0.16    0.15
   6  -2  14    0.28    0.18
  -6  -2 -15   20.58    1.29
   6  -2  15   19.34    1.22
  -6  -2 -15   19.34    1.20
   6  -2  15   20.61    1.10
  -6   2 -15   22.60    1.25
  -6   2 -15   17.31    1.11
  -6   2 -16    0.70    0.20
  -6  -2 -16    0.90    0.20
  -6  -2 -16    0.44    0.19
   6   2  17    8.38    0.50
   6  -2  17    7.71    0.49
  -6  -3  16    2.32    0.28
  -6  -3  16    2.00    0.25
  -6  -3  16    2.01    0.25
  -6  -3  16    1.87    0.23
   6  -3 -16    2.44    0.32
  -6   3  16    1.99    0.23
  -6   3  16    2.10    0.20
  -6   3  15    2.27    0.26
   6  -3 -15    1.91    0.26
  -6  -3  15    1.56    0.28
  -6  -3  15    2.23    0.31
  -6  -3  15    1.83    0.28
   6  -3 -15    2.32    0.39
  -6  -3  15    2.08    0.31
  -6   3  15    1.96    0.27
  -6   3  14    0.06    0.16
  -6  -3  14    0.02    0.14
  -6  -3  14   -0.03    0.20
  -6  -3  14    0.13    0.20
  -6  -3  14    0.13    0.20
  -6   3  14    0.05    0.14
   6  -3 -14   -0.09    0.16
   6  -3 -14   -0.05    0.29
  -6  -3  14   -0.04    0.20
  -6   3  13    3.02    0.40
  -6   3  13    3.42    0.39
  -6  -3  13    4.38    0.51
  -6  -3  13    4.23    0.48
  -6  -3  13    4.31    0.41
   6  -3 -13    3.48    0.44
  -6  -3  13    4.29    0.52
  -6  -3  13    3.45    0.45
   6  -3 -13    4.17    0.46
  -6   3  12   58.67    3.02
   6  -3 -12   56.87    3.14
  -6  -3  12   59.62    3.15
  -6  -3  12   66.72    3.03
  -6  -3  12   58.78    3.14
  -6  -3  12   58.65    3.20
  -6  -3  12   55.63    3.10
  -6   3  12   56.04    3.05
  -6  -3  12   58.97    3.18
   6  -3 -12   66.43    3.18
   6  -3 -11   58.40    2.95
  -6   3  11   54.90    2.81
  -6   3  11   51.12    2.74
  -6  -3  11   54.64    2.94
  -6  -3  11   51.76    2.87
  -6  -3  11   53.79    2.89
  -6  -3  11   55.48    2.98
  -6  -3  11   54.06    2.90
  -6  -3  11   59.39    2.79
   6  -3 -11   48.45    2.87
   6  -3 -11   55.96    3.19
  -6  -3  11   47.09    2.76
   6  -3 -10   29.26    2.51
  -6  -3  10   37.07    2.11
  -6  -3  10   39.56    1.99
  -6  -3  10   34.68    2.07
  -6  -3  10   36.26    2.16
  -6  -3  10   36.58    2.08
   6  -3 -10   31.22    2.61
   6  -3 -10   31.41    2.05
   6  -3 -10   35.96    2.32
   6  -3 -10   38.68    2.15
  -6   3  10   35.57    2.00
  -6   3  10   34.06    1.93
  -6  -3  10   36.54    2.14
  -6  -3  10   33.05    2.43
  -6  -3  10   34.25    2.01
   6  -3  -9   16.64    1.66
  -6  -3   9   18.99    1.28
  -6  -3   9   18.67    1.15
   6  -3  -9   16.68    1.71
  -6  -3   9   15.73    1.12
  -6  -3   9   15.99    1.21
  -6  -3   9   15.78    1.25
  -6  -3   9   16.08    1.20
   6  -3  -9   17.08    1.45
   6  -3  -9   19.38    1.32
  -6   3   9   19.45    1.18
  -6   3   9   16.85    1.09
  -6  -3   9   16.40    1.56
  -6  -3   9   17.26    1.27
  -6  -3   9   16.07    1.18
  -6  -3   9   15.89    1.12
   6  -3  -8   73.58    3.65
   6  -3  -8   72.72    4.35
   6  -3  -8   65.34    4.39
  -6  -3   8   75.80    3.78
  -6  -3   8   79.64    3.63
  -6  -3   8   60.97    4.04
   6  -3  -8   73.43    3.63
  -6  -3   8   68.64    3.66
  -6  -3   8   69.59    3.78
  -6  -3   8   72.30    3.74
  -6  -3   8   70.40    3.70
   6  -3  -8   70.20    4.00
   6  -3  -8   64.52    4.16
   6  -3  -8   74.26    3.71
  -6   3   8   64.56    3.59
  -6  -3   8   64.88    3.67
  -6  -3   8   68.42    3.65
   6  -3  -8   69.48    4.20
  -6  -3   8   70.51    4.23
   6  -3  -8   72.43    3.71
  -6  -3   8   71.18    3.78
   6  -3  -8   81.05    3.86
   6  -3  -7    1.13    0.36
   6  -3  -7    1.09    0.44
  -6  -3   7    1.65    0.37
  -6  -3   7    0.92    0.40
  -6  -3   7    1.04    0.31
  -6  -3   7    0.31    0.39
   6  -3  -7    1.44    0.36
   6  -3  -7    1.64    0.48
   6  -3  -7    1.21    0.49
   6  -3  -7    0.79    0.31
  -6  -3   7    0.69    0.25
  -6  -3   7    0.54    0.27
  -6  -3   7    1.05    0.32
   6  -3  -7    0.83    0.40
  -6  -3   7    0.94    0.34
   6  -3  -7    1.30    0.35
   6  -3  -7    0.96    0.47
  -6   3   7    1.25    0.29
  -6  -3   7    1.13    0.35
  -6  -3   7    0.95    0.34
  -6  -3   7    1.08    0.34
  -6  -3   7    0.64    0.32
  -6  -3   7    0.90    0.35
   6  -3  -7    0.26    0.46
   6  -3  -7    1.24    0.36
  -6  -3   7    1.01    0.30
  -6  -3   7    0.66    0.30
   6  -3  -6    7.08    1.12
  -6  -3   6    6.98    0.71
  -6  -3   6    7.53    0.73
  -6  -3   6    6.90    0.96
   6  -3  -6    8.11    1.09
   6  -3  -6    8.18    0.79
   6  -3  -6    7.76    0.75
  -6  -3   6    5.89    0.70
   6  -3  -6    6.87    0.98
  -6  -3   6    7.75    0.75
  -6  -3   6    7.39    0.57
  -6  -3   6    6.34    0.66
  -6  -3   6    7.03    0.75
   6  -3  -6    7.47    0.86
   6  -3  -6    7.13    0.74
   6  -3  -6    7.46    1.08
  -6   3   6    6.96    0.62
  -6  -3   6    6.63    0.70
  -6  -3   6    6.67    0.71
  -6  -3   6    7.18    0.73
  -6  -3   6    6.25    0.72
   6  -3  -6    6.58    0.69
  -6  -3   6    5.72    0.62
   6  -3  -6    7.72    0.79
  -6  -3   5    0.11    0.28
  -6  -3   5    0.17    0.21
  -6  -3   5   -0.43    0.46
  -6  -3   5    0.35    0.24
   6  -3  -5    0.46    0.32
   6  -3  -5    0.13    0.36
  -6  -3   5    0.10    0.22
   6  -3  -5    0.11    0.40
   6  -3  -5   -0.05    0.34
  -6  -3   5    0.25    0.22
  -6  -3   5   -0.05    0.25
   6  -3  -5   -0.21    0.35
  -6  -3   5    0.35    0.30
   6  -3  -5   -0.23    0.30
   6  -3  -5   -0.13    0.34
   6  -3  -5    0.56    0.31
  -6  -3   5    1.17    0.33
   6  -3  -5    0.36    0.36
  -6  -3   5    0.55    0.26
  -6  -3   5   -0.10    0.30
  -6  -3   5   -0.09    0.26
  -6  -3   5    0.05    0.24
  -6  -3   5    0.14    0.24
   6  -3  -5    0.15    0.28
   6  -3  -5    0.25    0.40
   6  -3  -4   18.80    1.31
  -6  -3   4   16.71    1.30
  -6  -3   4   19.42    1.17
  -6  -3   4   19.19    1.72
   6  -3  -4   19.30    1.84
   6  -3  -4   19.59    1.40
   6  -3  -4   18.10    1.72
  -6  -3   4   17.53    1.29
  -6  -3   4   19.68    1.35
   6  -3  -4   19.27    1.46
   6  -3  -4   18.50    1.84
   6  -3  -4   17.14    1.34
  -6  -3   4   16.65    1.23
   6  -3  -4   21.34    1.40
  -6  -3   4   17.70    1.30
  -6  -3   4   16.99    1.28
  -6  -3   4   15.97    1.26
  -6  -3   4   19.68    1.33
  -6  -3   4   20.48    1.22
  -6  -3   4   25.01    1.36
  -6  -3   4   16.00    1.66
   6  -3  -4   18.36    1.32
   6  -3  -4   18.89    1.36
  -6  -3   4   16.41    1.25
   6  -3  -4   15.84    1.68
   6  -3  -3  126.80    6.06
  -6  -3   3  112.03    6.03
  -6  -3   3  119.18    5.82
  -6  -3   3  107.96    6.49
   6  -3  -3  131.77    6.91
   6  -3  -3  121.64    6.13
  -6  -3   3  114.95    6.00
   6  -3  -3  121.51    6.69
  -6  -3   3  115.57    6.02
   6  -3  -3  118.93    6.15
  -6  -3   3  135.50    6.10
   6  -3  -3  129.87    6.93
   6  -3  -3  118.77    6.12
  -6  -3   3  106.21    5.91
  -6  -3   3  118.53    6.02
  -6  -3   3  116.67    6.03
  -6  -3   3  112.94    5.99
  -6  -3   3  140.75    5.94
  -6  -3   3  152.45    6.03
  -6  -3   3  121.96    6.03
  -6  -3   3  111.04    6.58
   6  -3  -3  123.06    6.05
  -6  -3   3  119.62    5.99
   6  -3  -3  120.25    6.07
   6  -3  -3  117.84    6.68
  -6  -3   2    0.65    0.33
  -6  -3   2    0.38    0.29
   6  -3  -2    0.59    0.53
   6  -3  -2   -0.05    0.34
  -6  -3   2   -0.14    0.25
   6  -3  -2    0.18    0.28
  -6  -3   2    0.46    0.32
  -6  -3   2    0.49    0.24
  -6  -3   2    0.46    0.27
  -6  -3   2    0.18    0.29
  -6  -3   2    0.14    0.24
  -6  -3   2    0.20    0.26
   6  -3  -2    0.52    0.34
  -6  -3   2   -0.12    0.44
   6  -3  -2    0.05    0.24
   6  -3  -1   12.03    1.03
  -6  -3   1   14.74    1.03
  -6  -3   1   11.96    0.82
  -6  -3   1   11.62    1.32
   6  -3  -1   12.38    1.49
   6  -3  -1   12.42    1.07
   6  -3  -1   13.75    1.05
  -6  -3   1   12.32    1.03
  -6  -3   1   10.85    0.97
   6  -3  -1    9.86    1.30
  -6  -3   1   12.29    1.01
  -6  -3   1   13.65    1.06
  -6  -3   1   14.34    1.03
   6  -3  -1   11.08    1.01
   6  -3  -1   12.49    1.50
  -6  -3   1   10.23    0.90
  -6  -3   1   12.47    1.05
  -6  -3   1   12.92    1.02
  -6  -3   1   13.92    0.94
  -6  -3   1   15.18    1.00
  -6  -3   1   11.94    1.00
  -6  -3   1   12.76    1.39
   6  -3  -1   13.51    1.06
  -6  -3   1   12.08    0.98
  -6  -3   1   10.92    0.90
   6  -3   0   14.60    1.14
   6  -3   0   16.86    1.70
   6  -3   0   15.29    1.19
  -6  -3   0   14.98    1.08
  -6  -3   0   14.26    0.90
  -6  -3   0   12.54    1.37
  -6  -3   0   14.19    1.09
  -6  -3   0   13.06    1.08
  -6  -3   0   14.39    1.07
  -6  -3   0   13.78    1.12
   6  -3   0   12.93    1.14
   6  -3   0   19.09    1.82
  -6  -3   0   14.24    1.06
  -6  -3   0   13.82    1.15
  -6  -3   0   13.60    1.09
  -6  -3   0   14.51    1.11
   6  -3   0   12.84    1.14
  -6  -3   0   16.72    1.05
  -6  -3   0   15.58    1.14
   6  -3   0   14.28    1.05
  -6  -3   0   13.34    1.03
   6  -3   1    4.15    0.58
  -6  -3  -1    3.02    0.73
   6  -3   1    4.39    0.58
  -6  -3  -1    4.62    0.54
  -6  -3  -1    3.12    0.73
  -6  -3  -1    3.62    0.57
  -6  -3  -1    3.27    0.53
   6  -3   1    5.31    0.87
   6  -3   1    4.21    0.60
   6  -3   1    5.67    0.98
   6  -3   1    4.46    0.61
  -6  -3  -1    4.73    0.53
  -6  -3  -1    2.50    0.49
   6  -3   1    3.63    0.84
   6  -3   1    3.42    0.56
  -6  -3  -1    3.35    0.54
  -6  -3  -1    3.03    0.48
  -6  -3  -1    2.37    0.47
  -6  -3  -1    4.17    0.56
   6  -3   1    4.18    0.56
  -6  -3  -1    4.65    0.58
  -6  -3  -1    4.08    0.47
  -6  -3  -1    4.01    0.46
   6  -3   1    3.61    0.48
  -6  -3  -1    4.29    0.52
  -6  -3  -1    3.31    0.51
  -6  -3  -1    3.09    0.49
  -6  -3  -2   98.53    6.06
   6  -3   2  120.21    5.55
   6   3   2  106.20    5.98
   6  -3   2  126.17    5.62
  -6  -3  -2  116.81    5.46
  -6  -3  -2  102.22    6.00
   6  -3   2  119.83    6.40
   6  -3   2  102.59    5.57
  -6  -3  -2  107.45    5.52
   6  -3   2  113.98    5.52
   6  -3   2  121.50    6.25
  -6  -3  -2  105.08    5.46
  -6  -3  -2  105.25    5.50
  -6  -3  -2  120.13    5.47
  -6  -3  -2  104.37    5.53
   6  -3   2  103.94    6.25
   6  -3   2  101.72    5.57
  -6  -3  -2   95.79    5.42
  -6  -3  -2  114.42    5.52
  -6  -3  -2  105.37    5.47
  -6  -3  -2  106.39    5.60
   6  -3   2   99.07    5.47
  -6  -3  -2  124.65    5.40
  -6  -3  -2  121.12    5.36
   6  -3   2  110.97    5.50
  -6  -3  -2   98.63    5.44
  -6  -3  -2  105.85    5.47
  -6  -3  -3  130.03    7.53
   6  -3   3  150.74    7.01
   6   3   3  138.20    7.53
  -6  -3  -3  132.14    7.47
   6  -3   3  142.75    7.77
   6  -3   3  128.70    7.16
   6  -3   3  141.65    7.06
   6  -3   3  153.44    7.02
  -6  -3  -3  138.99    7.00
   6  -3   3  145.70    7.64
  -6  -3  -3  136.99    6.96
  -6  -3  -3  155.17    7.07
  -6  -3  -3  150.51    6.92
  -6  -3  -3  140.60    7.05
   6  -3   3  156.04    7.92
   6  -3   3  143.47    7.08
  -6  -3  -3  126.61    6.92
  -6  -3  -3  138.86    6.97
  -6  -3  -3  153.38    7.02
   6  -3   3  129.93    6.93
  -6  -3  -3  170.10    6.90
   6  -3   3  141.98    7.01
  -6  -3  -3  133.03    6.97
  -6  -3  -3  138.88    6.98
  -6  -3  -4   43.87    2.47
   6  -3   4   45.53    2.44
  -6  -3  -4   41.09    2.85
   6  -3   4   40.91    3.03
   6  -3   4   41.59    2.71
   6  -3   4   38.53    2.44
   6  -3   4   41.25    2.91
  -6  -3  -4   43.38    2.43
   6  -3   4   35.68    2.34
  -6  -3  -4   40.10    2.50
   6  -3   4   41.95    3.06
   6  -3   4   44.95    2.52
  -6  -3  -4   41.13    2.45
  -6  -3  -4   45.45    2.47
  -6  -3  -4   43.67    2.43
  -6  -3  -4   46.11    2.46
   6  -3   4   43.73    2.48
   6  -3   4   44.66    2.43
   6   3   4   40.52    2.85
   6  -3   5  147.32    6.74
  -6  -3  -5  133.67    6.75
  -6  -3  -5  130.40    7.22
   6  -3   5  132.35    7.41
   6  -3   5  136.37    7.18
   6  -3   5  132.43    6.78
   6  -3   5  140.25    7.33
  -6  -3  -5  131.31    6.72
   6  -3   5  126.44    6.70
  -6  -3  -5  137.87    6.87
   6  -3   5  138.53    7.50
   6  -3   5  130.89    6.78
  -6  -3  -5  140.13    6.77
  -6  -3  -5  145.32    6.99
  -6  -3  -5  137.96    6.74
  -6  -3  -5  142.53    6.77
   6  -3   5  148.37    6.85
   6  -3   5  149.82    6.75
   6   3   5  133.79    7.36
   6   3   6  267.19   13.39
  -6  -3  -6  258.43   13.24
   6  -3   6  246.85   13.32
   6  -3   6  260.95   12.75
   6  -3   6  256.15   13.25
  -6  -3  -6  275.55   12.77
   6  -3   6  275.92   12.70
   6  -3   6  263.08   13.24
  -6  -3  -6  269.54   12.73
   6  -3   6  258.28   12.71
  -6  -3  -6  255.77   12.87
   6  -3   6  265.38   13.46
   6  -3   6  282.88   12.82
  -6  -3  -6  268.94   12.83
  -6  -3  -6  274.55   12.99
  -6  -3  -6  270.08   12.74
  -6  -3  -6  303.20   12.83
   6  -3   6  290.89   12.90
   6  -3   6  284.47   12.71
  -6  -3  -6  261.29   12.84
  -6  -3  -6  274.15   12.78
   6   3   7    0.21    0.36
   6  -3   7    1.01    0.34
   6  -3   7    0.82    0.43
   6  -3   7    0.85    0.31
   6  -3   7    0.82    0.31
  -6  -3  -7    0.76    0.37
  -6  -3  -7    0.63    0.40
  -6  -3  -7    0.69    0.37
   6  -3   7    0.78    0.40
   6  -3   7    0.51    0.27
  -6  -3  -7    0.39    0.39
  -6  -3  -7    0.71    0.37
  -6  -3  -7    0.47    0.45
   6  -3   8    3.81    0.63
  -6  -3  -8    2.62    0.48
  -6  -3  -8    2.39    0.50
   6  -3   8    2.41    0.40
   6   3   8    2.51    0.59
   6  -3   8    4.12    0.57
  -6  -3  -8    2.50    0.57
  -6  -3  -8    2.33    0.43
  -6  -3  -8    3.10    0.57
  -6  -3  -9   23.23    1.43
  -6  -3  -9   26.52    1.64
  -6   3  -9   25.10    1.44
   6  -3   9   20.44    1.49
  -6  -3  -9   24.90    1.71
   6  -3   9   24.28    1.61
   6  -3   9   25.60    1.44
  -6  -3  -9   22.43    1.59
  -6   3 -10   -0.35    0.21
  -6  -3 -10   -0.10    0.27
  -6  -3 -10   -0.14    0.32
   6  -3  10    0.22    0.19
   6  -3  10    0.35    0.27
  -6  -3 -10    0.06    0.32
   6  -3  10    0.21    0.23
  -6   3 -11    0.95    0.23
   6  -3  11    1.51    0.33
  -6  -3 -11    1.17    0.34
   6  -3  11    1.38    0.24
   6  -3  11    1.64    0.34
  -6  -3 -11    1.37    0.31
  -6  -3 -11    1.61    0.39
   6  -3  11    1.40    0.30
  -6  -3 -12    0.30    0.23
   6  -3  12    0.60    0.16
   6  -3  12    0.36    0.22
   6  -3  12    0.20    0.19
  -6  -3 -12    0.39    0.26
   6  -3  12    0.65    0.23
  -6  -3 -13    4.41    0.41
   6  -3  13    4.00    0.37
   6  -3  13    3.71    0.43
  -6  -3 -13    4.14    0.48
   6  -3  13    4.10    0.41
  -6   3 -14    0.51    0.15
   6  -3  14    0.27    0.10
  -6  -3 -14    0.89    0.20
   6   3  14    0.48    0.16
   6  -3  14    0.83    0.17
   6  -3  14    0.42    0.17
   6   3  15    1.63    0.17
  -6  -4  14    0.09    0.09
  -6  -4  14    0.02    0.10
   6  -4 -14    0.05    0.10
   6  -4 -14    0.08    0.08
  -6  -4  13    2.75    0.32
  -6  -4  13    3.51    0.33
   6  -4 -13    3.17    0.33
  -6  -4  12    0.13    0.14
  -6  -4  12    0.03    0.19
  -6  -4  12   -0.05    0.17
   6  -4 -12   -0.07    0.24
   6  -4 -12   -0.03    0.18
  -6  -4  11    2.71    0.31
  -6  -4  11    2.90    0.40
   6  -4 -11    2.36    0.36
  -6  -4  11    3.23    0.39
   6  -4 -11    2.67    0.38
   6  -4 -11    2.66    0.46
   6  -4 -10    1.53    0.41
  -6  -4  10    1.29    0.27
  -6  -4  10    0.98    0.27
  -6  -4  10    1.03    0.33
   6  -4 -10    0.90    0.31
   6  -4 -10    1.12    0.31
  -6  -4   9    4.57    0.56
   6  -4  -9    3.49    0.56
   6  -4  -9    3.93    0.53
   6  -4  -9    4.23    0.62
  -6  -4   9    3.99    0.47
   6  -4  -8   84.15    4.43
   6  -4  -8   85.63    4.27
  -6  -4   8   88.71    4.29
  -6  -4   8   77.17    4.24
   6  -4  -8   93.01    4.58
  -6  -4   8   92.35    4.47
   6  -4  -8   87.70    4.63
   6  -4  -8   89.62    4.22
   6  -4  -8   95.13    4.27
  -6  -4   8   81.23    4.33
  -6  -4   7   15.84    1.13
   6  -4  -7   14.11    1.25
   6  -4  -7   16.01    1.05
   6  -4  -7   16.15    1.11
   6  -4  -7   14.78    1.09
  -6  -4   7   17.29    1.13
  -6  -4   7   15.57    1.08
  -6  -4   7   17.65    1.23
  -6  -4   7   18.10    1.06
   6  -4  -7   16.86    1.08
   6  -4  -7   14.15    1.16
   6  -4  -6    0.53    0.34
   6  -4  -6    0.42    0.30
   6  -4  -6    0.19    0.35
  -6  -4   6    0.33    0.24
   6  -4  -6    0.28    0.26
  -6  -4   6    0.10    0.23
  -6  -4   6    0.35    0.26
  -6  -4   6    0.09    0.31
  -6  -4   6    0.15    0.31
  -6  -4   6    0.32    0.30
  -6  -4   6    0.05    0.31
  -6  -4   6    0.45    0.30
   6  -4  -6    0.37    0.29
   6  -4  -6    0.59    0.29
   6  -4  -5    6.93    0.79
  -6  -4   5    7.34    0.72
  -6  -4   5    7.91    0.63
  -6  -4   5    6.93    0.69
   6  -4  -5    7.40    0.85
   6  -4  -5    7.20    0.72
   6  -4  -5    8.98    0.82
  -6  -4   5    7.21    0.66
  -6  -4   5    7.39    0.76
  -6  -4   5    7.37    0.79
  -6  -4   5    7.28    0.71
   6  -4  -5    7.63    0.86
  -6  -4   5    6.66    0.76
   6  -4  -5    7.51    0.72
   6  -4  -5    7.25    0.74
   6  -4  -4    2.59    0.55
   6  -4  -4    3.70    0.57
  -6  -4   4    3.60    0.52
  -6  -4   4    3.44    0.48
  -6  -4   4    3.36    0.51
  -6  -4   4    2.89    0.52
  -6  -4   4    4.13    0.59
  -6  -4   4    4.45    0.57
  -6  -4   4    3.53    0.52
   6  -4  -4    3.83    0.60
   6  -4  -4    2.88    0.52
  -6  -4   4    4.04    0.43
   6  -4  -4    3.77    0.60
  -6  -4   4    2.41    0.51
   6  -4  -4    3.69    0.55
   6  -4  -4    3.87    0.57
   6  -4  -3    0.17    0.30
   6  -4  -3    0.05    0.34
  -6  -4   3   -0.11    0.21
  -6  -4   3    0.12    0.36
   6  -4  -3   -0.19    0.34
  -6  -4   3    0.16    0.37
   6  -4  -3    0.06    0.32
   6  -4  -3    0.14    0.36
  -6  -4   3    0.04    0.29
  -6  -4   3   -0.14    0.28
  -6  -4   3   -0.29    0.35
  -6  -4   3   -0.16    0.35
  -6  -4   3    0.05    0.36
  -6  -4   3    0.26    0.30
  -6  -4   3    0.14    0.27
   6  -4  -3    0.07    0.35
   6  -4  -3   -0.15    0.31
   6  -4  -3   -0.12    0.36
   6  -4  -3   -0.13    0.54
  -6  -4   3    0.33    0.31
   6  -4  -2   58.36    3.12
  -6  -4   2   56.35    2.99
  -6  -4   2   52.96    2.77
   6  -4  -2   48.28    3.51
  -6  -4   2   53.81    2.96
  -6  -4   2   63.36    3.17
   6  -4  -2   50.11    3.07
   6  -4  -2   62.14    3.08
   6  -4  -2   53.82    3.76
  -6  -4   2   44.41    2.78
  -6  -4   2   48.21    2.92
  -6  -4   2   51.49    2.97
  -6  -4   2   55.90    3.13
   6  -4  -2   51.16    3.10
  -6  -4   2   64.36    2.96
  -6  -4   2   72.22    3.05
  -6  -4   2   58.45    3.08
   6  -4  -2   56.38    3.04
   6  -4  -2   52.53    3.70
   6   4  -1    1.44    0.50
   6  -4  -1    2.80    0.52
   6  -4  -1    2.18    0.46
  -6  -4   1    3.04    0.56
   6  -4  -1    3.23    0.78
   6  -4  -1    3.11    0.54
   6  -4  -1    2.59    0.53
  -6  -4   1    2.57    0.53
  -6  -4   1    2.54    0.45
  -6  -4   1    1.67    0.38
  -6  -4   1    2.52    0.48
  -6  -4   1    3.13    0.52
  -6  -4   1    2.97    0.54
  -6  -4   1    2.70    0.54
  -6  -4   1    3.56    0.47
   6  -4  -1    1.93    0.50
  -6  -4   1    2.76    0.47
  -6  -4   1    1.64    0.63
  -6  -4   1    2.89    0.58
   6  -4  -1    2.81    0.52
   6  -4  -1    3.51    0.57
  -6  -4   1    2.26    0.43
  -6  -4   0   35.46    2.15
  -6  -4   0   35.90    2.07
  -6  -4   0   38.64    2.09
   6  -4   0   27.62    1.87
  -6  -4   0   32.49    2.55
   6  -4   0   35.02    2.11
  -6  -4   0   38.60    2.22
   6  -4   0   34.21    2.19
   6  -4   0   34.70    2.77
  -6  -4   0   33.48    2.01
  -6  -4   0   34.82    2.08
  -6  -4   0   35.68    2.13
   6  -4   0   34.72    2.18
  -6  -4   0   44.37    2.09
   6   4   0   26.53    2.31
   6  -4   0   41.20    2.24
   6  -4   0   37.93    2.23
   6  -4   0   34.79    2.79
   6  -4   1   21.34    1.49
  -6  -4  -1   19.71    1.97
  -6  -4  -1   25.82    1.74
  -6  -4  -1   30.84    1.72
   6  -4   1   25.13    1.62
  -6  -4  -1   25.70    1.64
  -6  -4  -1   24.68    1.68
   6  -4   1   26.77    1.78
   6  -4   1   25.20    2.29
  -6  -4  -1   25.04    1.61
  -6  -4  -1   25.58    1.69
   6  -4   1   24.84    1.69
  -6  -4  -1   27.96    1.59
  -6  -4  -1   30.18    1.59
   6  -4   1   26.19    1.69
   6  -4   1   26.24    1.69
   6  -4   1   28.09    1.78
   6  -4   1   26.50    2.27
   6  -4   2    2.38    0.40
  -6  -4  -2    2.92    0.54
  -6  -4  -2    4.04    0.51
   6  -4   2    2.22    0.45
   6  -4   2    3.92    0.56
   6  -4   2    3.91    0.59
  -6  -4  -2    5.33    0.65
  -6  -4  -2    3.39    0.50
  -6  -4  -2    3.82    0.55
  -6  -4  -2    2.92    0.52
  -6  -4  -2    3.81    0.56
   6  -4   2    3.52    0.52
  -6  -4  -2    3.90    0.45
   6  -4   2    3.95    0.53
   6  -4   2    3.96    0.58
  -6  -4  -2    4.27    0.49
  -6  -4  -3    3.72    0.62
   6  -4   3    3.41    0.48
  -6  -4  -3    5.81    0.56
   6  -4   3    4.35    0.57
   6  -4   3    4.32    0.58
  -6  -4  -3    3.74    0.58
  -6  -4  -3    3.66    0.54
  -6  -4  -3    3.95    0.57
  -6  -4  -3    4.72    0.61
  -6  -4  -3    5.27    0.61
   6  -4   3    4.29    0.53
  -6  -4  -3    5.02    0.47
   6  -4   3    4.99    0.57
   6  -4   3    4.30    0.54
   6  -4   3    4.63    0.61
  -6  -4  -4    2.00    0.34
   6  -4   4    2.25    0.40
   6  -4   4    1.57    0.37
  -6  -4  -4    1.81    0.40
  -6  -4  -4    1.74    0.40
  -6  -4  -4    1.42    0.40
  -6  -4  -4    1.34    0.35
   6  -4   4    1.73    0.32
  -6  -4  -4    1.70    0.46
   6  -4   4    1.84    0.36
   6  -4   4    1.54    0.38
   6  -4   4    2.17    0.38
  -6  -4  -4    1.81    0.42
   6  -4   4    1.51    0.39
  -6  -4  -5    1.64    0.41
   6  -4   5    2.13    0.38
  -6  -4  -5    1.86    0.43
  -6  -4  -5    1.93    0.38
   6  -4   5    2.18    0.36
  -6  -4  -5    2.61    0.51
   6  -4   5    2.52    0.40
  -6  -4  -5    1.87    0.41
  -6  -4  -5    1.60    0.40
   6  -4   5    2.76    0.37
   6  -4   5    1.62    0.34
   6  -4   5    1.79    0.38
  -6  -4  -6    0.99    0.33
   6  -4   6    0.75    0.24
  -6  -4  -6    0.55    0.26
   6  -4   6    0.90    0.23
   6  -4   6    0.42    0.20
   6  -4   6    0.54    0.23
   6  -4   6    0.44    0.23
  -6  -4  -6    0.71    0.32
  -6  -4  -6    1.20    0.39
   6  -4   6    0.92    0.30
  -6  -4  -7    3.67    0.46
  -6  -4  -7    3.12    0.47
   6  -4   7    3.01    0.36
   6  -4   7    3.03    0.40
   6  -4   7    2.96    0.34
  -6  -4  -7    4.10    0.57
   6  -4   7    2.58    0.44
   6  -4   8   -0.03    0.19
   6  -4   8   -0.09    0.20
  -6  -4  -8    0.20    0.22
  -6  -4  -8    0.15    0.28
  -6  -4  -8    0.03    0.20
  -6  -4  -8    0.54    0.29
   6  -4   9   16.14    0.91
   6  -4   9   13.82    0.92
  -6  -4  -9   12.68    1.01
  -6  -4  -9   12.90    0.97
   6  -4   9   15.17    0.96
  -6  -4  -9   14.53    0.99
  -6  -4 -10    0.03    0.19
   6  -4  10    0.10    0.16
  -6  -4 -10   -0.06    0.22
   6  -4  10   -0.07    0.15
   6  -4  10    0.27    0.18
  -6  -4 -11    1.36    0.24
   6  -4  11    1.43    0.21
  -6  -4 -11    1.02    0.23
   6  -4  11    1.50    0.18
   6  -4  11    1.38    0.21
  -6  -4 -12    2.55    0.25
   6  -4  12    3.82    0.26
   6  -5  -9   -0.05    0.09
   6  -5  -8    0.14    0.12
   6  -5  -8    0.13    0.12
   6  -5  -8    0.14    0.12
   6  -5  -7    3.79    0.37
   6  -5  -7    4.11    0.38
   6  -5  -6    0.07    0.15
   6  -5  -5    0.44    0.17
   6  -5  -5    0.54    0.17
   6  -5  -5    0.35    0.16
   6  -5  -5    0.20    0.20
   6  -5  -4    0.10    0.15
   6  -5  -4    0.16    0.13
   6  -5  -4    0.29    0.17
   6  -5  -4    0.52    0.19
   6  -5  -4    0.11    0.15
   6  -5  -4    0.06    0.19
   6  -5  -3    0.22    0.20
   6  -5  -3    0.13    0.16
   6  -5  -3    0.08    0.16
   6  -5  -3   -0.07    0.15
   6  -5  -3   -0.16    0.18
  -6  -5   3    0.32    0.23
   6  -5  -3   -0.09    0.17
  -6  -5   2    0.44    0.21
   6  -5  -2    0.40    0.18
   6  -5  -2    0.20    0.17
  -6  -5   2    0.25    0.26
   6  -5  -2    0.39    0.18
   6  -5  -2    0.28    0.20
   6  -5  -1   15.58    1.01
   6  -5  -1   16.87    1.01
   6  -5  -1   14.97    0.92
   6  -5  -1   12.69    0.92
  -6  -5   1   16.61    0.97
  -6  -5   1   16.63    1.03
   6  -5  -1   14.58    0.93
  -6  -5   0    1.03    0.30
  -6  -5   0    0.89    0.27
   6  -5   0    0.98    0.27
   6  -5   0    1.13    0.25
   6  -5   0    1.08    0.26
   6  -5   0    0.97    0.24
   6  -5   1    0.99    0.24
   6  -5   1    1.07    0.24
  -6  -5  -1    1.22    0.28
   6  -5   1    1.24    0.26
  -6  -5  -1    1.08    0.30
  -6  -5  -1    0.95    0.31
   6  -5   1    1.27    0.23
   6  -5   1    1.28    0.26
   6  -5   2    0.17    0.18
  -6  -5  -2    0.27    0.25
  -6  -5  -2    0.05    0.23
   6  -5   2    0.13    0.17
   6  -5   2    0.16    0.15
   6  -5   2    0.10    0.16
   6  -5   3    1.17    0.17
  -6  -5  -3    1.23    0.29
  -6  -5  -3    1.55    0.29
  -6  -5  -3    0.94    0.20
   6  -5   3    1.14    0.23
   6  -5   3    1.23    0.22
   6  -5   3    0.84    0.18
  -6  -5  -4    1.09    0.23
   6  -5   4    1.66    0.23
   6  -5   4    1.23    0.20
  -6  -5  -4    1.23    0.30
   6  -5   5    2.31    0.27
   6  -5   5    2.07    0.20
   6  -5   5    1.97    0.19
  -6  -5  -5    1.86    0.31
  -6  -5  -5    2.55    0.28
   6  -5   6    0.98    0.16
  -6  -5  -6    0.68    0.18
  -6  -5  -6    0.94    0.18
   6  -5   7    0.26    0.09
  -6  -5  -7    0.14    0.10
  -6  -5  -7    0.13    0.09
   7   0 -19    0.02    0.14
  -7   0  19    0.15    0.07
   7   0 -19   -0.08    0.13
  -7   0  18    2.18    0.28
   7   0 -18    2.13    0.35
  -7   0  18    2.15    0.26
   7   0 -17    0.19    0.23
  -7   0  17    0.12    0.15
  -7   0  17   -0.03    0.15
  -7   0  16    5.90    0.54
  -7   0  16    5.53    0.53
  -7   0  16    6.36    0.58
  -7   0  15    0.19    0.20
  -7   0  15    0.08    0.19
  -7   0  15   -0.04    0.22
  -7   0  14  145.07    6.91
   7   0 -14  152.11    7.87
   7   0 -14  139.71    6.96
  -7   0  14  143.73    6.94
  -7   0  14  142.18    6.91
   7   0 -14  138.16    7.70
  -7   0  13    0.13    0.23
   7   0 -13    0.13    0.37
  -7   0  13   -0.04    0.22
   7   0 -13   -0.13    0.45
  -7   0  13   -0.14    0.23
  -7   0  12   64.31    3.41
   7   0 -12   73.32    4.30
  -7   0  12   65.40    3.43
  -7   0  12   66.00    3.44
   7   0 -12   64.84    4.10
  -7   0  11    0.12    0.16
   7   0 -11   -0.12    0.34
  -7   0  11    0.64    0.26
   7   0 -11    0.58    0.39
  -7   0  11    0.22    0.20
  -7   0  10    7.90    0.70
   7   0 -10    9.22    1.13
  -7   0  10    8.44    0.72
  -7   0  10    8.85    0.72
   7   0 -10    8.50    1.11
  -7   0   9   -0.04    0.17
   7   0  -9    0.10    0.27
   7   0  -9    0.10    0.29
  -7   0   9    0.11    0.17
  -7   0   9    0.07    0.15
  -7   0   8    0.47    0.19
  -7   0   8    0.74    0.24
   7   0  -8    0.70    0.40
   7   0  -8    0.19    0.30
   7   0  -7   -0.25    0.28
  -7   0   7   -0.05    0.18
   7   0  -7   -0.08    0.30
  -7   0   7    0.02    0.12
  -7   0   6    7.61    0.72
   7   0  -6    8.47    0.90
  -7   0   6    7.53    0.54
  -7   0   5    0.05    0.18
   7   0  -5    0.14    0.21
  -7   0   5   -0.02    0.12
  -7   0   4   66.43    3.40
  -7   0   4   66.30    3.12
  -7   0   3    0.46    0.27
   7   0  -3    0.25    0.22
  -7   0   3    0.25    0.16
   7   0  -2  130.08    7.20
  -7   0   2  163.43    7.18
  -7   0   1    0.07    0.25
   7   0  -1    0.06    0.19
  -7   0   1   -0.05    0.21
  -7   0   0  290.22   13.84
  -7   0  -1    0.23    0.23
  -7   0  -1    0.06    0.15
  -7   0  -2   39.44    2.64
  -7   0  -2   43.44    2.20
  -7   0  -2   42.79    2.30
  -7   0  -3   -0.08    0.33
  -7   0  -3    0.09    0.13
  -7   0  -3    0.07    0.17
  -7   0  -3   -0.14    0.20
   7   0   3   -0.04    0.16
   7   0   4  131.28    6.96
  -7   0  -4  141.93    7.36
  -7   0  -4  150.21    6.76
  -7   0  -4  153.49    7.06
  -7   0  -4  140.04    6.90
  -7   0  -5    0.64    0.36
  -7   0  -5    0.18    0.13
  -7   0  -5    0.48    0.23
  -7   0  -5    0.10    0.21
   7   0   5    0.05    0.17
   7   0   6    1.55    0.32
  -7   0  -6    1.01    0.43
  -7   0  -6    1.32    0.21
  -7   0  -6    1.75    0.36
  -7   0  -6    1.24    0.31
  -7   0  -7   -0.19    0.26
   7   0   7    0.04    0.19
  -7   0  -7    0.14    0.19
   7   0   7    0.10    0.21
  -7   0  -7   -0.04    0.18
  -7   0  -7   -0.11    0.38
  -7   0  -7    0.15    0.17
  -7   0  -8    0.72    0.42
  -7   0  -8    0.31    0.25
  -7   0  -8    0.34    0.20
  -7   0  -8    0.05    0.24
   7   0   8    0.38    0.20
   7   0   8   -0.05    0.19
   7   0   8    0.34    0.23
   7   0   9    0.05    0.27
  -7   0  -9   -0.03    0.18
  -7   0  -9    0.28    0.27
   7   0   9    0.61    0.24
  -7   0  -9    0.39    0.35
  -7   0 -10   28.49    1.78
  -7   0 -10   36.72    2.10
  -7   0 -10   33.50    2.62
   7   0  10   33.62    2.00
   7   0  10   32.27    1.91
  -7   0 -11   -0.06    0.27
  -7   0 -11   -0.28    0.41
   7   0  11    0.11    0.25
   7   0  11    0.17    0.20
  -7   0 -12    0.12    0.28
  -7   0 -12    0.14    0.38
   7   0  12   -0.05    0.27
  -7   0 -12    0.20    0.31
  -7   0 -13   -0.06    0.29
   7   0  13   -0.39    0.30
  -7   0 -13   -0.19    0.30
  -7   0 -13   -0.24    0.32
  -7   0 -14    8.45    0.85
  -7   0 -14   10.49    0.88
  -7   0 -14   10.30    0.87
   7   0  14   10.63    0.87
  -7   0 -15   -0.09    0.23
   7   0  15    0.11    0.25
  -7   0 -15    0.23    0.25
  -7   0 -15    0.23    0.29
   7   0  16   71.92    3.43
  -7   0 -16   65.76    3.47
  -7   0 -16   69.69    3.45
  -7   0 -16   70.05    3.45
   7   0  16   66.80    3.38
   7   0  17   -0.06    0.17
  -7   0 -17    0.04    0.16
  -7   0 -17    0.06    0.17
   7  -1 -19    1.95    0.26
  -7  -1  19    2.74    0.26
  -7  -1  19    2.41    0.22
  -7   1  19    2.73    0.23
  -7   1  19    2.63    0.24
   7  -1 -18    0.25    0.20
  -7   1  18    0.42    0.17
   7   1 -18    0.28    0.19
   7  -1 -18   -0.06    0.18
   7  -1 -18    0.35    0.17
  -7  -1  18    0.48    0.17
  -7  -1  18    0.45    0.18
  -7   1  18    0.48    0.16
  -7  -1  17    0.79    0.25
  -7   1  17    1.40    0.28
   7  -1 -17    1.04    0.28
   7   1 -17    1.56    0.32
   7  -1 -17    1.38    0.30
   7  -1 -17    1.19    0.29
  -7  -1  16    1.46    0.31
  -7   1  16    1.17    0.29
   7  -1 -16    1.52    0.39
   7   1 -16    1.56    0.36
   7  -1 -16    1.29    0.33
   7  -1 -16    1.60    0.33
  -7   1  15   17.68    1.18
  -7  -1  15   16.42    1.06
   7  -1 -15   19.10    1.28
  -7  -1  15   15.44    1.06
  -7  -1  15   17.26    1.19
   7  -1 -14    4.89    0.98
  -7  -1  14    4.39    0.50
  -7   1  14    6.23    0.64
   7  -1 -14    4.09    0.88
   7  -1 -14    4.73    0.86
  -7  -1  14    4.87    0.50
   7  -1 -14    4.18    0.62
  -7  -1  14    5.17    0.62
  -7  -1  13  303.30   13.92
  -7  -1  13  269.65   13.72
   7  -1 -13  290.70   14.63
  -7   1  13  311.86   13.90
   7   1 -13  283.60   14.55
   7  -1 -13  285.35   14.64
  -7   1  13  321.71   13.91
   7  -1 -13  321.34   14.01
  -7  -1  13  273.75   13.71
   7  -1 -13  316.72   15.03
  -7  -1  12   36.68    2.08
  -7  -1  12   31.17    1.91
   7  -1 -12   33.00    2.55
   7   1 -12   31.13    2.46
  -7   1  12   38.10    2.07
  -7   1  12   35.48    2.04
   7  -1 -12   36.75    2.14
  -7  -1  12   30.96    1.91
   7  -1 -12   34.25    2.59
   7  -1 -12   37.89    2.87
   7  -1 -11   15.99    1.68
  -7  -1  11   14.63    1.09
   7   1 -11   15.42    1.51
   7  -1 -11   13.79    1.46
  -7   1  11   14.33    1.06
   7  -1 -11   14.90    1.15
  -7  -1  11   12.94    0.97
   7  -1 -11   12.38    1.38
  -7  -1  10   74.43    3.84
   7  -1 -10   82.78    4.74
  -7   1  10   74.13    3.80
   7  -1 -10   77.09    3.92
  -7  -1  10   71.12    3.73
   7   1 -10   68.17    4.27
   7  -1 -10   73.33    4.39
   7   1  -9   71.93    4.03
   7  -1  -9   75.04    4.11
   7  -1  -9   75.78    4.36
  -7  -1   9   71.87    3.56
  -7  -1   9   60.39    3.62
  -7  -1   9   62.37    3.30
  -7   1   9   70.41    3.52
   7  -1  -9   69.06    3.59
  -7  -1   9   68.00    3.44
  -7   1   8   30.54    1.68
   7  -1  -8   28.37    1.74
  -7  -1   8   26.12    1.60
   7   1  -8   32.38    2.12
   7  -1  -8   31.09    2.13
   7  -1  -8   30.51    2.29
  -7  -1   8   26.37    1.58
  -7  -1   8   28.80    1.71
  -7  -1   8   29.91    1.91
  -7  -1   8   25.29    1.50
  -7  -1   8   28.11    1.90
   7  -1  -8   30.25    1.61
   7  -1  -7  303.04   14.34
  -7  -1   7  302.27   14.74
  -7   1   7  309.35   14.39
  -7  -1   7  307.67   14.72
   7  -1  -7  332.26   15.26
   7   1  -7  317.16   14.91
   7  -1  -7  334.58   14.94
  -7  -1   7  308.43   14.43
  -7  -1   7  305.14   14.34
  -7   1   7  310.68   14.41
   7  -1  -6  142.38    6.95
   7  -1  -6  128.72    6.16
  -7  -1   6  122.52    6.51
  -7  -1   6  133.81    6.56
   7  -1  -6  141.98    6.67
   7   1  -6  128.81    6.61
  -7  -1   6  121.82    6.14
  -7  -1   5   61.07    3.35
   7  -1  -5   64.42    3.64
   7  -1  -5   65.44    3.39
  -7  -1   5   54.69    2.96
  -7  -1   4   39.40    2.35
   7  -1  -4   35.61    2.19
   7  -1  -4   39.28    2.55
   7  -1  -4   41.70    2.35
  -7  -1   4   37.13    2.01
   7  -1  -3   71.47    3.87
  -7  -1   3   65.78    3.27
  -7  -1   3   66.75    3.62
   7  -1  -3   62.99    3.39
   7  -1  -2  153.87    7.23
  -7  -1   2  137.30    6.61
   7  -1  -2  134.97    6.65
  -7  -1   2  146.44    6.99
  -7  -1   1  349.72   16.68
   7  -1  -1  366.68   16.85
  -7  -1   1  333.89   16.25
   7  -1  -1  366.84   16.27
  -7  -1   1  362.35   16.64
   7  -1   0   97.22    4.73
  -7  -1   0   96.65    5.13
  -7   1   0  101.16    5.19
  -7  -1  -1   39.31    2.11
   7  -1   1   40.39    2.13
  -7  -1  -1   44.89    2.56
  -7   1  -1   41.20    2.52
  -7  -1  -1   40.14    2.43
  -7  -1  -2  115.98    5.63
  -7   1  -2  107.15    5.57
  -7  -1  -2  108.39    5.17
  -7   1  -2  100.27    5.12
  -7  -1  -2  105.74    5.46
  -7  -1  -2  105.75    5.11
   7  -1   2  107.60    5.13
   7  -1   3    0.32    0.21
  -7  -1  -3    0.80    0.33
  -7  -1  -3    1.17    0.23
  -7   1  -3    0.58    0.20
  -7  -1  -3    0.80    0.24
   7  -1   3    0.51    0.22
  -7   1  -3    0.61    0.31
  -7  -1  -3    0.48    0.33
  -7  -1  -4   47.07    2.90
  -7   1  -4   47.18    2.87
   7   1   4   44.57    2.74
   7  -1   4   46.26    2.42
  -7  -1  -4   44.08    2.71
  -7  -1  -4   51.21    2.77
  -7  -1  -4   45.60    2.39
   7  -1   4   45.66    2.43
  -7  -1  -4   45.89    2.47
  -7   1  -4   45.06    2.44
  -7  -1  -5   27.20    1.58
  -7  -1  -5   29.74    1.69
  -7   1  -5   29.10    1.66
   7   1   5   27.25    1.91
   7  -1   5   27.21    1.72
   7  -1   5   25.98    1.57
  -7  -1  -5   30.46    1.95
  -7  -1  -5   32.12    1.94
  -7   1  -5   25.18    1.95
  -7  -1  -5   30.68    2.14
  -7  -1  -5   26.84    1.57
  -7  -1  -6   67.43    3.96
  -7   1  -6   62.80    3.79
  -7   1  -6   68.35    3.18
  -7  -1  -6   61.15    3.27
  -7  -1  -6   65.37    3.26
   7  -1   6   63.75    3.42
   7   1   6   62.19    3.65
  -7  -1  -6   63.03    3.61
   7  -1   6   62.52    3.23
  -7  -1  -6   68.09    3.59
  -7  -1  -6   62.69    3.24
  -7  -1  -6   67.81    3.40
  -7   1  -6   62.27    3.34
  -7   1  -7    5.30    0.88
   7  -1   7    8.65    0.86
  -7  -1  -7    9.23    1.11
  -7  -1  -7    7.62    0.67
   7  -1   7    7.09    0.73
   7   1   7    7.98    0.92
  -7   1  -7    8.24    0.59
  -7  -1  -7    7.32    0.68
  -7  -1  -7    8.13    0.85
  -7   1  -7    8.37    0.75
  -7  -1  -7    7.41    0.74
  -7   1  -7    6.72    0.69
  -7   1  -7    8.73    0.57
  -7  -1  -7    7.34    0.62
   7  -1   8   22.14    1.56
   7   1   8   23.54    1.57
   7  -1   8   24.38    1.60
  -7   1  -8   25.82    1.38
  -7  -1  -8   23.51    1.50
  -7  -1  -8   27.11    1.65
  -7   1  -8   22.59    1.55
  -7  -1  -8   24.02    1.50
  -7   1  -8   23.09    1.94
  -7  -1  -8   23.12    2.05
   7   1   8   26.28    1.85
   7  -1   9    0.21    0.24
  -7   1  -9    0.08    0.21
  -7  -1  -9    0.25    0.27
  -7   1  -9    0.97    0.32
  -7  -1  -9    0.33    0.29
  -7  -1  -9    0.27    0.24
  -7   1  -9    0.42    0.27
  -7  -1  -9    0.71    0.27
  -7  -1  -9    0.78    0.43
  -7   1  -9    0.11    0.35
   7   1   9    0.08    0.27
   7  -1   9    0.36    0.27
   7   1   9    0.30    0.27
   7  -1  10    6.42    0.68
   7   1  10    5.78    0.65
  -7  -1 -10    4.45    0.58
  -7  -1 -10    5.92    0.69
  -7   1 -10    5.52    0.66
  -7  -1 -10    6.13    0.64
  -7  -1 -10    7.34    0.66
  -7   1 -10    6.16    0.64
  -7  -1 -10    6.08    0.99
  -7   1 -10    2.73    0.73
   7   1  10    4.93    0.74
   7  -1  10    3.66    0.57
   7   1  11    5.99    0.65
   7  -1  11    4.94    0.62
   7  -1  11    5.76    0.66
  -7  -1 -11    4.89    0.58
  -7   1 -11    8.31    0.76
  -7  -1 -11    5.12    0.66
  -7   1 -11    5.01    0.62
  -7  -1 -11    5.26    0.64
  -7  -1 -11    5.74    0.61
  -7  -1 -11    3.29    0.80
  -7   1 -11    5.04    0.88
   7   1  11    2.69    0.63
  -7  -1 -12   78.39    3.92
  -7  -1 -12   73.33    3.86
  -7   1 -12   83.59    3.91
   7  -1  12   81.99    3.95
   7   1  12   74.93    3.88
   7  -1  12   76.11    3.91
  -7  -1 -12   69.63    3.94
  -7   1 -12   73.55    3.92
  -7  -1 -12   65.37    3.74
  -7  -1 -13   15.82    1.21
  -7   1 -13   15.61    1.17
   7  -1  13   13.40    0.96
  -7   1 -13   18.32    1.19
  -7  -1 -13   18.59    1.24
  -7  -1 -13   16.52    1.15
   7  -1  13   17.27    1.20
   7   1  13   17.65    1.18
  -7   1 -14    2.81    0.44
  -7  -1 -14    2.92    0.44
  -7   1 -14    3.49    0.50
  -7  -1 -14    2.42    0.45
   7  -1  14    2.99    0.43
   7   1  14    2.90    0.42
  -7  -1 -14    2.62    0.45
   7  -1  14    2.20    0.39
  -7   1 -14    2.72    0.43
  -7  -1 -15   19.12    1.22
  -7  -1 -15   17.23    1.15
  -7   1 -15   19.53    1.20
  -7   1 -15   21.76    1.28
  -7  -1 -15   18.69    1.23
  -7   1 -15   20.18    1.22
   7  -1  15   17.69    1.17
   7   1  15   19.51    1.18
   7  -1  15   17.82    1.19
  -7   1 -16    0.06    0.20
  -7   1 -16    0.17    0.16
   7   1  16    0.04    0.15
   7  -1  16    0.09    0.16
  -7  -1 -16    0.08    0.14
  -7   1 -16    0.13    0.14
   7  -1  16   -0.03    0.15
   7   1  17    0.40    0.11
   7  -1  17    0.38    0.13
   7   1  17    0.27    0.11
  -7   1 -17    0.29    0.14
  -7   1 -17    0.22    0.12
  -7  -1 -17    0.26    0.14
  -7   2  18    2.68    0.25
  -7  -2  18    2.20    0.26
  -7  -2  18    2.65    0.26
  -7  -2  18    2.05    0.23
   7  -2 -18    2.30    0.27
  -7  -2  17    2.06    0.28
  -7  -2  17    1.96    0.28
  -7   2  17    1.93    0.27
  -7  -2  17    1.20    0.18
  -7   2  17    2.17    0.28
  -7  -2  17    1.46    0.27
   7  -2 -17    2.04    0.33
  -7   2  16   12.18    0.81
  -7  -2  16   12.27    0.87
  -7  -2  16   12.55    0.86
  -7  -2  16   11.21    0.75
  -7  -2  16   10.23    0.70
   7  -2 -16   11.75    0.96
   7  -2 -16   10.60    0.77
  -7   2  16   11.56    0.81
  -7   2  15    0.04    0.22
   7  -2 -15    0.51    0.27
  -7  -2  15    0.26    0.18
  -7  -2  15    0.17    0.18
  -7   2  15    0.18    0.23
   7   2 -15    0.15    0.16
   7  -2 -15    0.15    0.17
  -7  -2  15    0.28    0.25
  -7  -2  15    0.04    0.22
  -7  -2  14    0.23    0.31
   7   2 -14    0.09    0.22
   7  -2 -14    0.46    0.23
  -7   2  14    0.16    0.23
   7  -2 -14    0.22    0.22
  -7   2  14    0.21    0.24
   7  -2 -14    0.32    0.30
  -7  -2  14    0.08    0.22
  -7  -2  14    0.39    0.22
  -7  -2  14    0.25    0.26
  -7  -2  14    0.41    0.20
  -7  -2  13   40.59    2.30
  -7   2  13   41.23    2.21
   7  -2 -13   38.12    2.31
  -7   2  13   40.58    2.20
  -7  -2  13   36.85    2.15
  -7  -2  13   37.94    2.24
   7  -2 -13   33.32    2.15
   7  -2 -13   38.00    2.42
  -7  -2  13   37.11    2.13
  -7  -2  13   37.06    2.13
   7  -2 -13   41.48    2.22
  -7  -2  12   61.93    3.17
  -7  -2  12   62.89    3.32
  -7  -2  12   62.11    3.33
  -7   2  12   65.61    3.39
  -7  -2  12   63.72    3.47
   7  -2 -12   69.41    3.54
  -7   2  12   65.01    3.36
   7  -2 -12   61.31    3.85
   7  -2 -12   57.78    3.92
  -7  -2  11   72.55    3.56
  -7  -2  11   68.04    3.67
  -7  -2  11   71.60    3.70
  -7   2  11   73.97    3.73
  -7  -2  11   68.84    3.80
  -7   2  11   75.44    3.71
   7  -2 -11   74.28    3.88
   7  -2 -11   65.77    4.19
   7  -2 -11   61.38    4.24
  -7  -2  10   22.87    1.33
  -7  -2  10   21.14    1.42
  -7  -2  10   19.86    1.41
  -7   2  10   24.74    1.50
  -7  -2  10   22.01    1.54
   7  -2 -10   22.16    1.56
  -7   2  10   22.66    1.43
   7  -2 -10   23.40    1.89
   7   2 -10   20.14    1.74
   7  -2 -10   19.75    1.86
  -7  -2   9  206.26    9.08
  -7  -2   9  190.74    9.18
  -7  -2   9  161.84    9.41
  -7  -2   9  191.68    9.29
  -7   2   9  201.73    9.23
   7  -2  -9  198.83    9.37
  -7   2   9  199.09    9.18
  -7  -2   9  182.70    9.16
   7  -2  -9  185.47    9.78
   7  -2  -9  193.45    9.72
   7   2  -9  189.59    9.66
  -7  -2   8    3.37    0.46
  -7  -2   8    3.08    0.46
  -7  -2   8    3.63    0.66
   7  -2  -8    3.55    0.46
   7   2  -8    3.70    0.65
   7  -2  -8    3.51    0.62
   7  -2  -8    2.24    0.59
  -7  -2   8    2.88    0.60
  -7  -2   8    3.81    0.43
   7  -2  -8    3.38    0.46
   7  -2  -8    3.20    0.66
  -7  -2   8    3.49    0.47
   7  -2  -8    2.68    0.57
   7  -2  -8    2.91    0.43
  -7  -2   8    3.76    0.51
  -7  -2   8    2.86    0.44
   7  -2  -8    3.76    0.69
   7  -2  -8    3.10    0.45
  -7   2   8    3.55    0.48
   7  -2  -8    3.70    0.56
  -7  -2   8    4.04    0.48
  -7   2   8    3.48    0.45
  -7  -2   8    4.15    0.56
  -7  -2   7   74.71    4.65
   7  -2  -7   79.06    4.66
   7  -2  -7   84.36    4.22
  -7  -2   7   81.98    4.25
  -7  -2   7   81.51    4.67
  -7  -2   7   80.58    4.22
  -7  -2   7   87.23    4.14
   7   2  -7   83.17    4.63
   7  -2  -7   92.72    4.68
   7  -2  -7   84.82    4.72
  -7  -2   7   76.23    4.19
   7  -2  -7   83.72    4.81
   7  -2  -7   77.88    4.25
  -7  -2   7   86.75    4.34
  -7  -2   7   85.82    4.29
   7  -2  -7   81.31    4.28
   7  -2  -7   82.10    4.81
  -7   2   7   91.70    4.29
   7  -2  -7   85.37    4.41
  -7   2   7   86.44    4.21
  -7  -2   7   79.48    4.21
  -7  -2   7   83.23    4.24
   7  -2  -7   96.82    4.33
   7   2  -6   37.59    2.38
   7  -2  -6   34.41    2.27
  -7  -2   6   37.66    2.46
  -7  -2   6   35.00    2.01
  -7  -2   6   37.25    1.93
  -7  -2   6   34.22    2.03
   7  -2  -6   33.08    2.40
  -7  -2   6   33.94    2.01
   7  -2  -6   33.08    2.33
  -7  -2   6   34.26    2.45
   7  -2  -6   34.34    2.00
  -7  -2   6   33.97    2.07
  -7  -2   6   35.14    2.09
  -7  -2   6   33.77    2.02
   7  -2  -6   38.35    2.61
   7  -2  -6   30.47    2.01
  -7   2   6   36.99    2.03
  -7   2   6   36.18    1.97
   7  -2  -6   40.25    2.08
  -7  -2   6   35.84    2.00
  -7  -2   6   34.56    2.03
   7   2  -5    0.15    0.26
   7  -2  -5    0.20    0.23
   7  -2  -5    0.23    0.26
  -7  -2   5    0.17    0.21
  -7  -2   5    0.18    0.37
   7  -2  -5    0.10    0.37
  -7  -2   5   -0.19    0.27
  -7  -2   5    0.04    0.19
  -7  -2   5    0.05    0.23
   7  -2  -5    0.86    0.30
  -7  -2   5    0.04    0.24
   7  -2  -5    0.51    0.26
  -7  -2   5    0.89    0.30
  -7   2   5    0.23    0.19
  -7  -2   5    0.04    0.21
  -7   2   5    0.14    0.17
  -7  -2   5    0.16    0.21
  -7  -2   5   -0.08    0.22
  -7  -2   5    0.49    0.38
   7  -2  -5    0.21    0.26
  -7  -2   4   76.99    4.10
  -7  -2   4   81.17    4.13
  -7  -2   4   78.52    4.05
  -7  -2   4   82.60    4.55
  -7  -2   4   77.53    4.04
  -7   2   4   82.76    4.05
  -7  -2   4   74.56    4.06
  -7  -2   4   77.68    4.02
   7  -2  -4   77.46    4.21
  -7  -2   4   86.65    4.13
   7  -2  -4   83.60    4.33
  -7  -2   4   81.85    4.61
   7  -2  -4   87.61    4.11
  -7  -2   4   78.87    4.06
   7  -2  -4   86.85    4.64
  -7  -2   3   50.75    2.74
  -7  -2   3   52.28    2.76
  -7  -2   3   47.25    3.16
   7  -2  -3   49.05    2.85
   7  -2  -3   56.64    2.79
   7  -2  -3   47.75    2.80
  -7  -2   3   50.70    2.76
  -7  -2   3   50.43    3.16
  -7  -2   3   52.26    2.60
  -7  -2   3   49.74    2.70
  -7  -2   3   52.35    2.79
  -7  -2   3   50.43    2.77
  -7  -2   3   51.09    2.73
   7  -2  -3   53.29    3.24
   7  -2  -2    2.84    0.65
  -7  -2   2    2.40    0.33
   7  -2  -2    2.18    0.38
  -7  -2   2    3.26    0.45
  -7  -2   2    3.66    0.47
  -7  -2   2    3.52    0.43
  -7  -2   2    2.47    0.59
   7  -2  -2    3.06    0.45
  -7  -2   2    3.89    0.48
  -7  -2   2    3.10    0.44
  -7  -2   1   18.25    1.19
  -7  -2   1   16.47    1.20
  -7  -2   1   19.38    1.55
  -7  -2   1   15.99    1.13
  -7  -2   1   16.59    1.15
   7  -2  -1   18.44    1.58
  -7  -2   1   16.68    1.17
  -7  -2   1   20.32    1.62
   7  -2  -1   16.93    1.18
  -7  -2   1   18.84    1.21
   7  -2   0   24.05    1.45
  -7  -2   0   21.78    1.77
  -7  -2   0   22.99    1.42
  -7  -2   0   21.71    1.42
  -7  -2   0   24.00    1.50
  -7  -2   0   24.35    1.47
  -7  -2  -1    4.31    0.61
   7  -2   1    4.67    0.79
  -7  -2  -1    4.66    0.52
  -7  -2  -1    4.76    0.52
  -7  -2  -1    4.30    0.48
  -7  -2  -1    4.57    0.53
  -7  -2  -1    5.24    0.55
   7  -2   1    4.86    0.58
  -7  -2  -1    4.55    0.55
   7  -2   1    7.76    0.63
  -7  -2  -1    4.40    0.51
  -7  -2  -1    4.89    0.77
   7  -2   1    3.63    0.49
  -7  -2  -1    4.54    0.75
   7  -2   1    4.54    0.53
   7  -2   2    0.72    0.30
  -7  -2  -2    1.14    0.44
  -7  -2  -2    0.19    0.21
  -7  -2  -2    0.70    0.26
  -7  -2  -2    0.25    0.25
  -7  -2  -2    0.37    0.26
   7  -2   2    0.11    0.23
   7  -2   2    0.76    0.28
  -7  -2  -2    0.59    0.30
   7  -2   2    0.29    0.45
  -7  -2  -2    0.53    0.35
  -7  -2  -2    0.54    0.29
  -7  -2  -2    1.02    0.30
   7  -2   2    0.66    0.26
  -7  -2  -2    0.57    0.27
  -7  -2  -3   32.64    1.85
  -7  -2  -3   27.67    1.80
  -7  -2  -3   30.73    1.82
  -7  -2  -3   31.91    1.85
  -7  -2  -3   32.70    2.29
   7  -2   3   35.53    1.88
   7  -2   3   33.55    1.95
  -7  -2  -3   30.81    2.20
  -7  -2  -3   30.21    1.81
  -7  -2  -3   29.76    2.10
  -7   2  -3   27.85    2.00
   7  -2   3   32.00    2.28
   7  -2   3   31.89    1.85
  -7  -2  -3   30.79    1.84
  -7  -2  -4    9.64    1.05
  -7   2  -4    8.40    0.93
  -7  -2  -4    9.48    0.81
   7  -2   4   10.36    1.15
  -7  -2  -4   10.43    1.12
  -7  -2  -4   10.71    0.81
   7   2   4    9.47    1.12
  -7  -2  -4    9.84    0.83
  -7  -2  -4   10.22    0.84
  -7  -2  -4   10.61    0.82
   7  -2   4   10.06    0.91
  -7  -2  -4   10.39    1.16
   7  -2   4   10.12    0.82
  -7  -2  -4   10.90    0.87
   7  -2   4    9.44    0.83
  -7  -2  -5    3.57    0.48
  -7  -2  -5    3.49    0.44
   7  -2   5    2.08    0.41
   7   2   5    3.10    0.65
   7  -2   5    2.42    0.38
  -7   2  -5    2.20    0.50
   7  -2   5    3.91    0.68
  -7  -2  -5    3.01    0.63
  -7  -2  -5    3.86    0.47
   7  -2   5    2.11    0.37
   7  -2   5    3.19    0.71
   7  -2   5    2.78    0.46
  -7  -2  -5    2.95    0.46
  -7  -2  -5    2.95    0.45
  -7  -2  -5    2.86    0.42
  -7  -2  -5    2.87    0.44
   7  -2   5    2.46    0.48
  -7  -2  -5    2.57    0.61
   7  -2   5    3.82    0.47
  -7  -2  -5    4.15    0.70
[truncated: 237,604 more chars]
